# Supplementary material for: Genome sequencing of 2000 canids by the Dog10K consortium advances the understanding of demography, genome function and architecture
Source: Genome Biol. 2023 Aug 15;24:187. doi: 10.1186/s13059-023-03023-7 (PMC10426128; doi:10.1186/s13059-023-03023-7)
Supplement: Supplementary file 1 — Additional file 1: Table S1. Sample metadata and analyses where used. Table S2. Samples with high F2 allele sharing with wolves. Table S3. Variation yet to be discovered based on 100 samples per breed. Table S4. Breed group placement of each sample. Table S5. Runs of homozygosity (ROH) statistics per sample. Table S6. Publicly available test samples used to measure imputation accuracy. Table S7. Copy number variable genes. Table S8. Potential retrogenes. Table S9. Candidate genes either overlapping or within a 100kb distance of a significant site for each targeted ancestry. Table S10. iSAFE top 10 sites per selection signature and ancestry component. Table S11. Observed fraction of theoretically possible SNVs. Table S12. Alignment and filtering strategies for three panels of normal variation. Table S13. Breed categories included in three panels of normal variation. Table S14. Summary of variant counts in Dog10K sample sets. Table S15. Distribution of SNVs across functional classes and Dog10K sample sets. Table S16. Genotypes observed for 76 OMIA variants. Table S17. Allele frequency distributions detected in Dog10K for OMIA categories. Table S18. Variant positions deviating from HWE. Table S19. Animal protocols, approving board, and date of approval. Table S20. Summary of duplicate genes within NCBI release 106. Table S21. Samples used in Ohana selection analysis. [file 13059_2023_3023_MOESM1_ESM.xlsx]

## Sheet: INDEX
Index of Supplementary Tables
Table S1.	Sample metadata and analyses where used.
Table S2.	Samples with high F2 allele sharing with wolves.
Table S3.	Variation yet to be discovered based on 100 samples per breed.
Table S4.	Breed group placement of each sample.
Table S5.	Runs of homozygosity (ROH) statistics per sample.
Table S6.	Publicly available test samples used to measure imputation accuracy.
Table S7.	Copy number variable genes.
Table S8.	Potential retrogenes.
Table S9.	Candidate genes either overlapping or within a 100kb distance of a significant site for each targeted ancestry.
Table S10.	iSAFE top 10 sites per selection signature and ancestry component
Table S11.	Observed fraction of theoretically possible SNVs.
Table S12.	Alignment and filtering strategies for three panels of normal variation.
Table S13.	Breed categories included in three panels of normal variation.
Table S14.	Summary of variant counts in Dog10K sample sets.
Table S15.	Distribution of SNVs across functional classes and Dog10K sample sets.
Table S16	Genotypes observed for 76 OMIA variants.
Table S17.	Allele frequency distributions detected in Dog10K for OMIA categories.
Table S18.	Variant positions deviating from HWE.
Table S19.	Animal protocols, approving board, and date of approval.
Table S20.	Summary of duplicate genes within NCBI release 106.
Table S21.	Samples used in Ohana selection analysis.

## Sheet: Table S1
Table S1. Sample metadata and analyses where used
Sample Name	Breed/Type	Category	BIOSAMID	runID	sampleName2	sampleName3	sampleName4	Source	Alignment Center	Note	In VQSR PASS VCF	In Strict Filter VCF	In SV analyses	Effective Autosomal Mean Coverage	Sex	mtDNA Haplogroup
ACKR000001	Cocker Spaniel	Breed_Dogs	SAMN15625691	SRR12330404	FAM007075	12451		NHGRI	Michigan		YES	YES	YES	18.91	Female	B1
ACKR000002	Cocker Spaniel	Breed_Dogs	SAMN15625692	SRR12330403	FAM007076	12452		NHGRI	Michigan		YES	YES	YES	18.4	Male	A1
ACKR000003	Cocker Spaniel	Breed_Dogs	SAMN15625693	SRR12330292	FAM007077	12453		NHGRI	Michigan		YES	YES	YES	26.3	Female	A1
AESK000001	American Eskimo Dog	Breed_Dogs	SAMN15625694	SRR12330181	FAM007058	8380		NHGRI	Michigan		YES	YES	YES	21.81	Male	A1
AESK000002	American Eskimo Dog	Breed_Dogs	SAMN15625695	SRR12330084	FAM007068	10805		NHGRI	Michigan		YES	YES	YES	17.62	Female	C1
AESK000003	American Eskimo Dog	Breed_Dogs	SAMN15625696	SRR12330073	FAM007069	10809		NHGRI	Michigan		YES	YES	YES	18.11	Female	C1
AESK000004	American Eskimo Dog	Breed_Dogs	SAMN15625697	SRR12330062	FAM007301	15300		NHGRI	Uppsala		YES	YES	YES	18.78	Male	A1
AESK000005	American Eskimo Dog	Breed_Dogs	SAMN15625698	SRR12330051	FAM007302	15301		NHGRI	Uppsala		YES	YES	YES	17.45	Male	A1
AESK000006	American Eskimo Dog	Breed_Dogs	SAMN15625699	SRR12330040	FAM007303	15304		NHGRI	Uppsala		YES	YES	YES	17.61	Male	A1
AFFN000001	Affenpinscher	Breed_Dogs	SAMN15625700	SRR12330029	FAM007292	33500		NHGRI	Michigan		YES	YES	YES	14.36	Female	A1
AFFN000002	Affenpinscher	Breed_Dogs	SAMN15625701	SRR12330402	FAM007298	34310		NHGRI	Uppsala		NO	NO	NO	10.1	Male	NotApplicable
AFFN000003	Affenpinscher	Breed_Dogs	SAMN15625702	SRR12330391	FAM007299	34314		NHGRI	Uppsala		YES	YES	YES	18.1	Female	A1
AFFN000004	Affenpinscher	Breed_Dogs	SAMN20151343	SRR15100282	AFP021	FAM005191		Helsinki	Helsinki		YES	YES	YES	21.23	Female	B1
AFFN000005	Affenpinscher	Breed_Dogs	SAMN20151344	SRR15100281	AFP023	FAM005192		Helsinki	Helsinki		YES	YES	YES	18.43	Male	B1
AFFN000006	Affenpinscher	Breed_Dogs	SAMN20151345	SRR15100220	AFP025	FAM005193		Helsinki	Helsinki		YES	YES	YES	20.09	Male	B1
AFGH000001	Afghan Hound	Breed_Dogs	SAMN29845568	SRR20326624	FAM004108	YP170308-001		RIT	Michigan		YES	YES	YES	19.65	Female	D2
AFOX000001	American Foxhound	Breed_Dogs	SAMN15625703	SRR12330380	FAM007304	34454		NHGRI	Uppsala		YES	YES	YES	17.77	Male	B1
AFOX000002	American Foxhound	Breed_Dogs	SAMN21035041	SRR16048740	AMK001A1	FAM006662		Helsinki	Helsinki		YES	YES	YES	19.18	Male	A1
AFOX000003	American Foxhound	Breed_Dogs	SAMN21035042	SRR16048739	AMK002A1	FAM006663		Helsinki	Helsinki		YES	YES	YES	16.67	Female	A1
AFOX000004	American Foxhound	Breed_Dogs	SAMN21035043	SRR16048460	AMK003A1	FAM006664		Helsinki	Helsinki		YES	YES	YES	19.21	Male	A1
AFOX000005	American Foxhound	Breed_Dogs	SAMN21035044	SRR16048714	AMK004A1	FAM006665		Helsinki	Helsinki		YES	YES	YES	19.41	Female	A1
AFOX000006	American Foxhound	Breed_Dogs	SAMN21035045	SRR16048547	AMK005A1	FAM006666		Helsinki	Helsinki		YES	YES	YES	19.23	Male	A1
AFOX000007	American Foxhound	Breed_Dogs	SAMN21035046	SRR16048879	AMK006A1	FAM006667		Helsinki	Helsinki		YES	YES	YES	22.12	Male	B1
AHRT000001	American Hairless Terrier	Breed_Dogs	SAMN15625704	SRR12330369	FAM007305	1118		NHGRI	Uppsala		YES	YES	YES	19.36	Male	A1
AHRT000002	American Hairless Terrier	Breed_Dogs	SAMN15625705	SRR12330358	FAM007306	1121		NHGRI	Uppsala		YES	YES	YES	15.93	Female	A1
AHRT000003	American Hairless Terrier	Breed_Dogs	SAMN15625706	SRR12330347	FAM007307	1124		NHGRI	Uppsala		YES	YES	YES	16.1	Female	A1
AHRT000004	American Hairless Terrier	Breed_Dogs	SAMN20151348	SRR15100187	AKT061	FAM005196		Helsinki	Helsinki		YES	YES	YES	19.75	Female	A1
AHRT000005	American Hairless Terrier	Breed_Dogs	SAMN20151349	SRR15100176	AKT062	FAM005197		Helsinki	Helsinki		YES	YES	YES	18	Male	B1
AIRT000001	Airedale Terrier	Breed_Dogs	SAMN20151361	SRR15100222	AT242	FAM005209		Helsinki	Helsinki		YES	YES	YES	23.39	Male	C1
AKBH000001	Akbash	Breed_Dogs	SAMN29845569	SRR20326623	FAM004015	ZTD16061324		RIT	Michigan	Bolvadin / Afyonkarahisar	YES	YES	YES	20.17	Female	A1
AKBH000002	Akbash	Breed_Dogs	SAMN29845570	SRR20326622	FAM004033	ZTD16061326		RIT	Michigan		YES	YES	YES	19.69	Female	A1
AKBH000003	Akbash	Breed_Dogs	SAMN29845571	SRR20326621	FAM004046	ZTD16061325		RIT	Michigan	Sivrihisar/Eskisehir	YES	YES	YES	20.34	Male	A1
AKIN000001	Japanese Akita	Breed_Dogs	SAMN21036191	SRR15734646	AI003	FAM005466		Bern	Bern		YES	YES	YES	21.02	Female	A1
AKIN000002	Japanese Akita	Breed_Dogs	SAMN21036192	SRR15734868	AI005	FAM005467		Bern	Bern		YES	YES	YES	17.82	Female	F
AKIT000001	American Akita	Breed_Dogs	SAMN15625707	SRR12330336	FAM007300	12758		NHGRI	Uppsala		YES	YES	YES	18.2	Female	A2
AKIT000002	Japanese Akita	Breed_Dogs	SAMN20151346	SRR15100209	AKI132	FAM005194		Helsinki	Helsinki		YES	YES	YES	18.55	Male	B2
AKIT000003	Japanese Akita	Breed_Dogs	SAMN20151347	SRR15100198	AKI142	FAM005195		Helsinki	Helsinki		YES	YES	YES	21.94	Female	A1
AKIT000004	American Akita	Breed_Dogs	SAMN20151350	SRR15100165	AMA090	FAM005198		Helsinki	Helsinki		YES	YES	YES	18.25	Male	B1
AKIT000005	American Akita	Breed_Dogs	SAMN20151351	SRR15100154	AMA091	FAM005199		Helsinki	Helsinki		YES	YES	YES	19.31	Male	B1
AKIT000006	American Akita	Breed_Dogs	SAMN20151352	SRR15100143	AMA104	FAM005200		Helsinki	Helsinki		YES	YES	YES	21.78	Male	F
AKIT000007	American Akita	Breed_Dogs	SAMN20151353	SRR15100280	AMA136	FAM005201		Helsinki	Helsinki		YES	YES	YES	21.76	Male	B2
AKIT000008	American Akita	Breed_Dogs	SAMN20151354	SRR15100269	AMA163	FAM005202		Helsinki	Helsinki		YES	YES	YES	19.06	Female	B1
AKIT000009	American Akita	Breed_Dogs	SAMN21036183	SRR15734676	AE001	FAM005383		Bern	Bern		YES	YES	YES	21.29	Female	A1
ALDB000001	Alpine Dachsbracke	Breed_Dogs	SAMN21036179	SRR15734805	AD001	FAM005547		Bern	Bern		YES	YES	YES	19.31	Male	A1
ALDB000002	Alpine Dachsbracke	Breed_Dogs	SAMN21036180	SRR15734709	AD004	FAM005548		Bern	Bern		YES	YES	YES	17.08	Male	A1
ALDB000003	Alpine Dachsbracke	Breed_Dogs	SAMN21036181	SRR15734698	AD010	FAM005549		Bern	Bern		YES	YES	YES	16.96	Female	A1
ALDB000004	Alpine Dachsbracke	Breed_Dogs	SAMN21036182	SRR15734687	AD026	FAM005550		Bern	Bern		YES	YES	YES	16.71	Female	A1
ALDB000005	Alpine Dachsbracke	Breed_Dogs	SAMN21035047	SRR16048868	AAK001A1	FAM006653		Helsinki	Helsinki		YES	YES	YES	17.59	Female	A1
ALDB000006	Alpine Dachsbracke	Breed_Dogs	SAMN21035048	SRR16048857	AAK002A1	FAM006654		Helsinki	Helsinki		YES	YES	YES	20.94	Male	A1
ALDB000007	Alpine Dachsbracke	Breed_Dogs	SAMN21035049	SRR16048818	AAK005A1	FAM006655		Helsinki	Helsinki		YES	YES	YES	18.9	Female	A1
AMAL000001	Alaskan Malamute	Breed_Dogs	SAMN15625708	SRR12330325	FAM007241	30099		NHGRI	Michigan		YES	YES	YES	18.19	Female	A1
AMAL000002	Alaskan Malamute	Breed_Dogs	SAMN19522718	SRR14750533	FAM006565	2-ADN7471		Rennes	Michigan		YES	YES	YES	17.99	Female	A1
AMAL000003	Alaskan Malamute	Breed_Dogs	SAMN21036196	SRR15734816	AM006	FAM005471		Bern	Bern		YES	YES	YES	19.75	Male	A1
AMBD000001	American Bulldog	Breed_Dogs	SAMN21036184	SRR15734665	AG001	FAM005384		Bern	Bern		YES	YES	YES	19.43	Female	A1
AMBD000002	American Bulldog	Breed_Dogs	SAMN21035050	SRR16048807	ABI002A1	FAM006656		Helsinki	Helsinki		YES	YES	YES	17.01	Female	A1
AMBD000003	American Bulldog	Breed_Dogs	SAMN21035051	SRR16048738	ABI005A1	FAM006657		Helsinki	Helsinki		YES	YES	YES	17.67	Female	A1
AMBD000004	American Bulldog	Breed_Dogs	SAMN21035052	SRR16048642	ABI006A1	FAM006658		Helsinki	Helsinki		NO	NO	NO	18.95	Male	NotApplicable
AMBD000005	American Bulldog	Breed_Dogs	SAMN21035053	SRR16048631	ABI007A1	FAM006659		Helsinki	Helsinki		YES	YES	YES	17.85	Male	B1
AMBD000006	American Bulldog	Breed_Dogs	SAMN21035054	SRR16048592	ABI009A1	FAM006660		Helsinki	Helsinki		NO	NO	NO	17.95	Female	NotApplicable
AMBD000007	American Bulldog	Breed_Dogs	SAMN21035055	SRR16048581	ABI012A1	FAM006661		Helsinki	Helsinki		YES	YES	YES	18.16	Male	A1
AMST000001	American Staffordshire Terrier	Breed_Dogs	SAMN15625709	SRR12330314	FAM007308	24030		NHGRI	Uppsala		YES	YES	YES	17.46	Female	A1
AMST000002	American Staffordshire Terrier	Breed_Dogs	SAMN15625710	SRR12330303	FAM007219	24262		NHGRI	Michigan		YES	YES	YES	18.61	Male	A1
AMST000003	American Staffordshire Terrier	Breed_Dogs	SAMN15625711	SRR12330291	FAM007239	29583		NHGRI	Michigan		YES	YES	YES	20.41	Male	B1
AMST000004	American Staffordshire Terrier	Breed_Dogs	SAMN21036206	SRR15734771	AS003	FAM005390		Bern	Bern		NO	NO	NO	17.63	Male	NotApplicable
AMST000005	American Staffordshire Terrier	Breed_Dogs	SAMN21036207	SRR15734757	AS004	FAM005391		Bern	Bern		YES	YES	YES	18.96	Male	A1
AMST000006	American Staffordshire Terrier	Breed_Dogs	SAMN20151360	SRR15100223	AST173	FAM005208		Helsinki	Helsinki		YES	YES	YES	20.68	Male	A1
AMWS000001	American Water Spaniel	Breed_Dogs	SAMN15625712	SRR12330280	FAM007035	987		NHGRI	Michigan		YES	YES	YES	19.38	Male	A1
AMWS000002	American Water Spaniel	Breed_Dogs	SAMN15625713	SRR12330269	FAM007036	988		NHGRI	Michigan		YES	YES	YES	19.94	Male	A1
AMWS000003	American Water Spaniel	Breed_Dogs	SAMN15625714	SRR12330258	FAM007132	29580		NHGRI	Michigan		YES	YES	YES	17.48	Female	A1
AMWS000004	American Water Spaniel	Breed_Dogs	SAMN21035056	SRR16048570	AVS002A1	FAM006671		Helsinki	Helsinki		YES	YES	YES	17.61	Female	A1
AMWS000005	American Water Spaniel	Breed_Dogs	SAMN21035057	SRR16048504	AVS003A1	FAM006672		Helsinki	Helsinki		YES	YES	YES	20.24	Male	A1
AMWS000006	American Water Spaniel	Breed_Dogs	SAMN21035058	SRR16048493	AVS001A1	FAM006815		Helsinki	Helsinki		YES	YES	YES	20.77	Female	A1
ANAT000001	Anatolian Shepherd Dog	Breed_Dogs	SAMN15625715	SRR12330247	FAM007309	7584		NHGRI	Uppsala		YES	YES	YES	16.82	Male	B1
ANAT000002	Anatolian Shepherd Dog	Breed_Dogs	SAMN29845305	SRR20326498	FAM004084	YPi2998		KIZ	Michigan	Turkey	NO	NO	NO	20.29	Male	NotApplicable
ANAT000003	Anatolian Shepherd Dog	Breed_Dogs	SAMN21036208	SRR15734746	AT001	FAM005392		Bern	Bern		YES	YES	YES	19.66	Female	A1
ANAT000004	Anatolian Shepherd Dog	Breed_Dogs	SAMN20151362	SRR15100221	ATP001	FAM005210		Helsinki	Helsinki		YES	YES	YES	21.62	Male	A1
ANAT000005	Anatolian Shepherd Dog	Breed_Dogs	SAMN19522719	SRR14750392	FAM005924	2-ADN11820		Rennes	Michigan		YES	YES	YES	17.25	Male	B1
ANAT000006	Anatolian Shepherd Dog	Breed_Dogs	SAMN19522720	SRR14750403	FAM005931	2-ADN12241		Rennes	Michigan		YES	YES	YES	16.83	Female	A1
ANAT000007	Anatolian Shepherd Dog	Breed_Dogs	SAMN19522721	SRR14750414	FAM006586	2-ADN8782		Rennes	Michigan		YES	YES	YES	20.54	Male	A1
ANFH000001	Anglo-Francais hound	Mixed/Other	SAMN19522722	SRR14750423	FAM005978	3-ADN1954		Rennes	Michigan		YES	YES	YES	17.88	Female	B1
ANFH000002	Anglo-Francais hound	Mixed/Other	SAMN19522723	SRR14750434	FAM006518	3-ADN4034		Rennes	Michigan		YES	YES	YES	16.96	Female	B1
ANFH000003	Anglo-Francais hound	Mixed/Other	SAMN19522724	SRR14750293	FAM005898	3-ADN10402		Rennes	Michigan		YES	YES	YES	19.08	Male	A1
ANFH000004	Anglo-Francais hound	Mixed/Other	SAMN19522725	SRR14750304	FAM006584	3-ADN865		Rennes	Michigan		YES	YES	YES	19.84	Male	A1
APPZ000001	Appenzeller Sennenhund	Breed_Dogs	SAMN21036197	SRR15734804	AP001	FAM005551		Bern	Bern		YES	YES	YES	17.03	Male	A1
APPZ000002	Appenzeller Sennenhund	Breed_Dogs	SAMN21036198	SRR15734793	AP002	FAM005552		Bern	Bern		YES	YES	YES	18.5	Male	A1
APPZ000003	Appenzeller Sennenhund	Breed_Dogs	SAMN21036202	SRR15734782	AP027	FAM005553		Bern	Bern		YES	YES	YES	19.83	Female	A1
APPZ000004	Appenzeller Sennenhund	Breed_Dogs	SAMN20151356	SRR15100247	APZ032	FAM005204		Helsinki	Helsinki		YES	YES	YES	18.01	Female	A1
APPZ000005	Appenzeller Sennenhund	Breed_Dogs	SAMN20151357	SRR15100236	APZ040	FAM005205		Helsinki	Helsinki		YES	YES	YES	18.05	Male	A1
APPZ000006	Appenzeller Sennenhund	Breed_Dogs	SAMN20151358	SRR15100225	APZ041	FAM005206		Helsinki	Helsinki		YES	YES	YES	17.39	Female	A1
APPZ000007	Appenzeller Sennenhund	Breed_Dogs	SAMN19522726	SRR14750315	FAM005932	2-ADN12281		Rennes	Michigan		YES	YES	YES	21.39	Male	A1
APPZ000008	Appenzeller Sennenhund	Breed_Dogs	SAMN19522727	SRR14750446	FAM006543	2-ADN5442		Rennes	Michigan		YES	YES	YES	18.72	Female	A1
APPZ000009	Appenzeller Sennenhund	Breed_Dogs	SAMN21036199	SRR16288924	AP003	FAM004600		Bern	Uppsala		YES	YES	YES	18.26	Female	A1
APPZ000010	Appenzeller Sennenhund	Breed_Dogs	SAMN21036200	SRR16288923	AP019	FAM004601		Bern	Uppsala		YES	YES	YES	17.18	Female	A1
APPZ000011	Appenzeller Sennenhund	Breed_Dogs	SAMN21036201	SRR16289012	AP025	FAM004602		Bern	Uppsala		YES	YES	YES	17.43	Male	A1
APPZ000012	Appenzeller Sennenhund	Breed_Dogs	SAMN21036203	SRR16289001	AP030	FAM004603		Bern	Uppsala		YES	YES	YES	17.88	Female	A1
APPZ000013	Appenzeller Sennenhund	Breed_Dogs	SAMN21036204	SRR16288990	AP035	FAM004604		Bern	Uppsala		YES	YES	YES	18.86	Male	A1
APPZ000014	Appenzeller Sennenhund	Breed_Dogs	SAMN21036205	SRR16288979	AP042	FAM004605		Bern	Uppsala		YES	YES	YES	17.71	Female	A1
ARHO000001	Artois Hound	Breed_Dogs	SAMN19522728	SRR14750457	FAM005997	3-ADN3134		Rennes	Michigan		YES	YES	YES	18.29	Female	A1
ARHO000002	Artois Hound	Breed_Dogs	SAMN19522729	SRR14750468	FAM005998	3-ADN3138		Rennes	Michigan		YES	YES	YES	18.19	Female	A1
ARIE000001	Ariegeois	Breed_Dogs	SAMN19522730	SRR14750327	FAM006535	3-ADN4909		Rennes	Michigan		YES	YES	YES	19.86	Male	B1
ARIP000001	Ariege Pointer	Breed_Dogs	SAMN19522731	SRR14750338	FAM005892	2-ADN10050		Rennes	Michigan		YES	YES	YES	17.96	Female	B1
ARIP000002	Ariege Pointer	Breed_Dogs	SAMN19522732	SRR14750350	FAM005994	2-ADN2720		Rennes	Michigan		YES	YES	YES	18.57	Male	B1
ARIP000003	Ariege Pointer	Breed_Dogs	SAMN19522733	SRR14750481	FAM006551	2-ADN6341		Rennes	Michigan		YES	YES	YES	21.12	Female	B1
ARIP000004	Ariege Pointer	Breed_Dogs	SAMN19522734	SRR14750492	FAM006552	2-ADN6342		Rennes	Michigan		YES	YES	YES	19.22	Male	B1
ARIP000005	Ariege Pointer	Breed_Dogs	SAMN19522735	SRR14750503	FAM006553	2-ADN6343		Rennes	Michigan		YES	YES	YES	19.69	Female	A1
ARIP000006	Ariege Pointer	Breed_Dogs	SAMN19522736	SRR14750362	FAM006554	2-ADN6344		Rennes	Michigan		YES	YES	YES	24.21	Male	A1
ASKT000001	Silky Terrier	Breed_Dogs	SAMN21035059	SRR16048482	SIT060A1	FAM005812		Helsinki	Helsinki		YES	YES	YES	20.75	Male	A1
ASKT000002	Silky Terrier	Breed_Dogs	SAMN21035060	SRR16048471	SIT099A1	FAM005813		Helsinki	Helsinki		YES	YES	YES	18.44	Male	A1
ASKT000003	Silky Terrier	Breed_Dogs	SAMN21035061	SRR16048459	SIT101A1	FAM005814		Helsinki	Helsinki		YES	YES	YES	18.06	Female	B1
AUCD000001	Australian Cattle Dog	Breed_Dogs	SAMN15625716	SRR12330236	FAM007030	887		NHGRI	Michigan		YES	YES	YES	18.52	Male	B1
AUCD000002	Australian Cattle Dog	Breed_Dogs	SAMN15625717	SRR12330225	FAM007062	9994		NHGRI	Michigan		YES	YES	YES	18.64	Male	A1
AUCD000003	Australian Cattle Dog	Breed_Dogs	SAMN15625718	SRR12330214	FAM007107	25269		NHGRI	Michigan		YES	YES	YES	17.81	Female	A1
AUCD000004	Australian Cattle Dog	Breed_Dogs	SAMN21036177	SRR15734768	AC140	FAM005545		Bern	Bern		YES	YES	YES	17.93	Male	B1
AUCD000005	Australian Cattle Dog	Breed_Dogs	SAMN21036178	SRR15734767	AC182	FAM005546		Bern	Bern		NO	NO	NO	18.47	Female	NotApplicable
AUPO000001	Auvergne Pointer	Breed_Dogs	SAMN19522737	SRR14750373	FAM005913	3-ADN11260		Rennes	Michigan		YES	YES	YES	18.37	Male	A1
AUPO000002	Auvergne Pointer	Breed_Dogs	SAMN19522738	SRR14750376	FAM005916	3-ADN11402		Rennes	Michigan		YES	YES	YES	17.22	Female	A1
AUPO000003	Auvergne Pointer	Breed_Dogs	SAMN19522739	SRR14750377	FAM005951	4-ADN13052_1		Rennes	Michigan		YES	YES	YES	20.6	Male	A1
AUPO000004	Auvergne Pointer	Breed_Dogs	SAMN19522740	SRR14750378	FAM006574	3-ADN8149		Rennes	Michigan		YES	YES	YES	17.78	Female	A1
AUPO000005	Auvergne Pointer	Breed_Dogs	SAMN19522741	SRR14750379	FAM006610	4-ADNPR3658_1		Rennes	Michigan		YES	YES	YES	20.55	Male	C1
AUPO000006	Auvergne Pointer	Breed_Dogs	SAMN19522742	SRR14750381	FAM006616	3-ADNPR4232_1		Rennes	Michigan		YES	YES	YES	19.95	Male	A1
AUSK000001	Australian Kelpie	Breed_Dogs	SAMN21036193	SRR15734857	AK003	FAM005468		Bern	Bern		YES	YES	YES	19.46	Female	C2
AUSK000002	Australian Kelpie	Breed_Dogs	SAMN21036194	SRR15734846	AK004	FAM005469		Bern	Bern		YES	YES	YES	18.99	Male	C2
AUSK000003	Australian Kelpie	Breed_Dogs	SAMN21036195	SRR15734835	AK020	FAM005470		Bern	Bern		YES	YES	YES	17.38	Female	A1
AUSK000004	Australian Kelpie	Breed_Dogs	SAMN20151363	SRR15100219	AUK077	FAM005211		Helsinki	Helsinki		YES	YES	YES	20.82	Female	A1
AUSK000005	Australian Kelpie	Breed_Dogs	SAMN20151364	SRR15100218	AUK124	FAM005212		Helsinki	Helsinki		YES	YES	YES	19.94	Male	C2
AUSK000006	Australian Kelpie	Breed_Dogs	SAMN20151365	SRR15100217	AUK177	FAM005213		Helsinki	Helsinki		YES	YES	YES	21.4	Female	C2
AUSS000001	Australian Shepherd	Breed_Dogs	SAMN15625719	SRR12330203	FAM007130	29479		NHGRI	Michigan		YES	YES	YES	20.25	Male	A1
AUSS000002	Australian Shepherd	Breed_Dogs	SAMN21036209	SRR15734713	AU094	FAM005554		Bern	Bern		YES	YES	YES	17.67	Female	A1
AUSS000003	Australian Shepherd	Breed_Dogs	SAMN20151355	SRR15100258	APK393	FAM005203		Helsinki	Helsinki		YES	YES	YES	21.7	Male	B1
AUST000001	Australian Terrier	Breed_Dogs	SAMN15625720	SRR12330192	FAM007310	8663		NHGRI	Uppsala		YES	YES	YES	16.34	Female	B1
AUST000002	Australian Terrier	Breed_Dogs	SAMN15625721	SRR12330180	FAM007247	30508		NHGRI	Michigan		YES	YES	YES	22.02	Male	B1
AUST000003	Australian Terrier	Breed_Dogs	SAMN20151366	SRR15100216	AUT225	FAM005214		Helsinki	Helsinki		YES	YES	YES	21.93	Female	B1
AUST000004	Australian Terrier	Breed_Dogs	SAMN20151367	SRR15100215	AUT309	FAM005215		Helsinki	Helsinki		YES	YES	YES	22.63	Male	B1
AUST000005	Australian Terrier	Breed_Dogs	SAMN20151368	SRR15100214	AUT427	FAM005216		Helsinki	Helsinki		YES	YES	YES	18.22	Male	B1
AZWK000001	Azawakh	Breed_Dogs	SAMN29845306	SRR20326497	FAM004085	YPi2999		KIZ	Michigan	Niger	YES	NO	NO	20.74	Male	NotApplicable
BAND000001	Bandog	Mixed/Other	SAMN29845195	SRR20326576	FAM009501	4299		Cornell	Uppsala		YES	YES	YES	18.98	Male	A1
BANO000001	Basset Artesien Normand	Breed_Dogs	SAMN19522743	SRR14750382	FAM005915	3-ADN1137		Rennes	Michigan		YES	YES	YES	23.16	Male	B1
BANO000002	Basset Artesien Normand	Breed_Dogs	SAMN19522744	SRR14750383	FAM005979	3-ADN2075		Rennes	Michigan		YES	YES	YES	18.45	Female	B1
BANO000003	Basset Artesien Normand	Breed_Dogs	SAMN19522745	SRR14750384	FAM005984	2-ADN2257		Rennes	Michigan		YES	YES	YES	17.87	Male	B1
BANO000004	Basset Artesien Normand	Breed_Dogs	SAMN19522746	SRR14750385	FAM006529	3-ADN4432		Rennes	Michigan		YES	YES	YES	20.36	Male	B1
BANO000005	Basset Artesien Normand	Breed_Dogs	SAMN21035062	SRR16048840	BAN001A1	FAM006673		Helsinki	Helsinki		YES	YES	YES	17.46	Female	B1
BANO000006	Basset Artesien Normand	Breed_Dogs	SAMN21035063	SRR16048829	BAN002A1	FAM006674		Helsinki	Helsinki		YES	YES	YES	16.95	Female	B1
BASS000001	Basset Hound	Breed_Dogs	SAMN15625722	SRR12330169	FAM007067	10376		NHGRI	Michigan		YES	YES	YES	19.22	Female	B1
BASS000002	Basset Hound	Breed_Dogs	SAMN15625723	SRR12330158	FAM007081	12885		NHGRI	Michigan		YES	YES	YES	21.96	Male	B1
BASS000003	Basset Hound	Breed_Dogs	SAMN15625724	SRR12330147	FAM007084	13196		NHGRI	Michigan		YES	YES	YES	17.92	Female	B1
BASS000004	Basset Hound	Breed_Dogs	SAMN21036226	SRR15734701	BH001	FAM005394		Bern	Bern		YES	YES	YES	17.89	Male	B1
BASS000005	Basset Hound	Breed_Dogs	SAMN20151384	SRR15100196	BH047	FAM005232		Helsinki	Helsinki		YES	YES	YES	17.89	Male	B1
BASS000006	Basset Hound	Breed_Dogs	SAMN20151385	SRR15100195	BH083	FAM005233		Helsinki	Helsinki		YES	YES	YES	17.1	Male	B1
BASS000007	Basset Hound	Breed_Dogs	SAMN19522747	SRR14750386	FAM006597	2-ADN9413		Rennes	Michigan		YES	YES	YES	20.91	Female	B1
BBLS000001	White Swiss Shepherd Dog	Breed_Dogs	SAMN21036213	SRR15734710	BB005	FAM005472		Bern	Bern		YES	YES	YES	18.34	Female	A1
BBLS000002	White Swiss Shepherd Dog	Breed_Dogs	SAMN21036214	SRR15734708	BB037	FAM005473		Bern	Bern		YES	YES	YES	18.78	Male	A1
BBLS000003	White Swiss Shepherd Dog	Breed_Dogs	SAMN21036215	SRR15734707	BB042	FAM005474		Bern	Bern		YES	YES	YES	19.21	Female	A1
BEAU000001	Beauceron	Breed_Dogs	SAMN15625725	SRR12330136	FAM007133	29598		NHGRI	Michigan		YES	YES	YES	17.73	Female	B1
BEAU000002	Belgian Tervuren	Breed_Dogs	SAMN15625726	SRR12330125	FAM007163	33058		NHGRI	Michigan		YES	YES	YES	17.51	Male	B1
BEAU000003	Beauceron	Breed_Dogs	SAMN21036221	SRR15734706	BF001	FAM005393		Bern	Bern		YES	YES	YES	18.74	Male	A1
BEAU000004	Beauceron	Breed_Dogs	SAMN20151377	SRR15100204	BE100	FAM005225		Helsinki	Helsinki		YES	YES	YES	18.26	Female	A1
BEAU000005	German shepherd mix	Mixed/Other	SAMN19522748	SRR14750387	FAM005895	2-ADN10277		Rennes	Michigan		YES	YES	YES	17.09	Male	A1
BEAU000006	Beauceron	Breed_Dogs	SAMN19522749	SRR14750388	FAM005914	2-ADN11263		Rennes	Michigan		YES	YES	YES	17.1	Female	A1
BEAU000007	German shepherd mix	Mixed/Other	SAMN19522750	SRR14750509	FAM006622	2-ADNPR4615		Rennes	Michigan		YES	YES	YES	19.47	Male	C1
BEDT000001	Bedlington Terrier	Breed_Dogs	SAMN15625727	SRR12330114	FAM007234	27328		NHGRI	Michigan		YES	YES	YES	18.59	Male	A1
BEDT000002	Bedlington Terrier	Breed_Dogs	SAMN15625728	SRR12330104	FAM007311	28914		NHGRI	Uppsala		NO	NO	NO	10.75	Male	NotApplicable
BEDT000003	Bedlington Terrier	Breed_Dogs	SAMN15625729	SRR12330093	FAM007312	31124		NHGRI	Uppsala		YES	YES	YES	16.43	Male	A1
BEDT000004	Bedlington Terrier	Breed_Dogs	SAMN15625730	SRR12330085	FAM007287	33486		NHGRI	Michigan		YES	YES	YES	18.67	Male	A1
BEDT000005	Bedlington Terrier	Breed_Dogs	SAMN15625731	SRR12330083	FAM007294	33606		NHGRI	Michigan		YES	YES	YES	20.37	Male	A1
BEDT000006	Bedlington Terrier	Breed_Dogs	SAMN20151423	SRR15100153	BT117	FAM005271		Helsinki	Helsinki		YES	YES	YES	21.7	Male	A1
BEDT000007	Bedlington Terrier	Breed_Dogs	SAMN20151424	SRR15100152	BT118	FAM005272		Helsinki	Helsinki		YES	YES	YES	17.9	Male	B1
BEDT000008	Bedlington Terrier	Breed_Dogs	SAMN20151425	SRR15100151	BT122	FAM005273		Helsinki	Helsinki		YES	YES	YES	17.35	Male	A1
BELS000001	Belgian Sheepdog	Breed_Dogs	SAMN15625732	SRR12330082	FAM007143	30647		NHGRI	Michigan		YES	YES	YES	20.22	Male	A1
BELS000002	Belgian Sheepdog	Breed_Dogs	SAMN15625733	SRR12330081	FAM007152	31144		NHGRI	Michigan		YES	YES	YES	18.62	Female	A1
BELS000003	Belgian Sheepdog	Breed_Dogs	SAMN20151397	SRR15100182	BPG023	FAM005245		Helsinki	Helsinki		YES	YES	YES	22.04	Male	B1
BERG000001	Bergamasco Sheepdog	Breed_Dogs	SAMN21036235	SRR15734691	BMH001	FAM005397		Bern	Bern		YES	YES	YES	16.98	Female	A1
BERG000002	Bergamasco Sheepdog	Breed_Dogs	SAMN21036236	SRR15734690	BMH004	FAM005398		Bern	Bern		YES	YES	YES	17.06	Female	A1
BERG000003	Bergamasco Sheepdog	Breed_Dogs	SAMN21036237	SRR15734689	BMH005	FAM005399		Bern	Bern		YES	YES	YES	18.11	Female	A1
BERG000004	Bergamasco Sheepdog	Breed_Dogs	SAMN21036238	SRR15734688	BMH007	FAM005400		Bern	Bern		YES	YES	YES	17.12	Female	A1
BERG000005	Bergamasco Sheepdog	Breed_Dogs	SAMN21036239	SRR15734686	BMH010	FAM005401		Bern	Bern		YES	YES	YES	18.01	Male	A1
BERG000006	Bergamasco Sheepdog	Breed_Dogs	SAMN21036240	SRR15734685	BMH011	FAM005402		Bern	Bern		YES	YES	YES	18.06	Female	A1
BFDB000001	Basset Fauve de Bretagne	Breed_Dogs	SAMN20151373	SRR15100208	BB086	FAM005221		Helsinki	Helsinki		YES	YES	YES	18.38	Female	B1
BFDB000002	Basset Fauve de Bretagne	Breed_Dogs	SAMN20151374	SRR15100207	BB096	FAM005222		Helsinki	Helsinki		YES	YES	YES	21.48	Male	A1
BFDB000003	Basset Fauve de Bretagne	Breed_Dogs	SAMN20151375	SRR15100206	BB097	FAM005223		Helsinki	Helsinki		YES	YES	YES	21.14	Female	B1
BFDB000004	Unknown	Breed_Dogs	SAMN19522751	SRR14750510	FAM005912	2-ADN11231		Rennes	Michigan		YES	NO	NO	18.87	Male	NotApplicable
BFDB000005	Basset Fauve de Bretagne	Breed_Dogs	SAMN19522752	SRR14750512	FAM006550	2-ADN633_1		Rennes	Michigan		YES	YES	YES	18.24	Male	A1
BFDB000006	Basset Fauve de Bretagne	Breed_Dogs	SAMN19522753	SRR14750513	FAM006562	2-ADN7079		Rennes	Michigan		YES	YES	YES	18.13	Female	A1
BGBA000001	Blue Gascony Griffon	Breed_Dogs	SAMN19522754	SRR14750514	FAM006523	3-ADN4158		Rennes	Michigan		YES	YES	YES	19	Female	A1
BGGR000001	Blue Gascony Griffon	Breed_Dogs	SAMN19522755	SRR14750515	FAM005966	3-ADN1388		Rennes	Michigan		YES	YES	YES	20.38	Male	B1
BGGR000002	Blue Gascony Griffon	Breed_Dogs	SAMN19522756	SRR14750516	FAM005993	3-ADN2670		Rennes	Michigan		YES	YES	YES	19.5	Male	A1
BHSP000001	Bohemian Shepherd	Breed_Dogs	SAMN20151447	SRR15100275	CP004A1	FAM005295		Helsinki	Helsinki		YES	YES	YES	18.86	Female	A1
BHSP000002	Bohemian Shepherd	Breed_Dogs	SAMN20151448	SRR15100274	CP007A1	FAM005296		Helsinki	Helsinki		YES	YES	YES	18.66	Female	A1
BHSP000003	Bohemian Shepherd	Breed_Dogs	SAMN20151449	SRR15100273	CP011A1	FAM005297		Helsinki	Helsinki		YES	YES	YES	19.88	Female	A1
BHSP000004	Bohemian Shepherd	Breed_Dogs	SAMN20151450	SRR15100272	CP014A1	FAM005298		Helsinki	Helsinki		YES	YES	YES	21.46	Female	A1
BHSP000005	Bohemian Shepherd	Breed_Dogs	SAMN20151451	SRR15100271	CP018A1	FAM005299		Helsinki	Helsinki		YES	YES	YES	21.97	Male	A1
BHSP000006	Bohemian Shepherd	Breed_Dogs	SAMN20151452	SRR15100270	CP020A1	FAM005300		Helsinki	Helsinki		YES	YES	YES	20.88	Male	A1
BICH000001	Bichon Frise	Breed_Dogs	SAMN15625734	SRR12330080	FAM007034	974		NHGRI	Michigan		YES	YES	YES	18.24	Female	B1
BICH000002	Bichon Frise	Breed_Dogs	SAMN15625735	SRR12330079	FAM007082	13125		NHGRI	Michigan		YES	YES	YES	19.15	Female	B1
BICH000003	Bichon Frise	Breed_Dogs	SAMN15625736	SRR12330078	FAM007085	13198		NHGRI	Michigan		YES	YES	YES	17.86	Female	B1
BICH000004	Bichon Frise	Breed_Dogs	SAMN20151386	SRR15100194	BIF470	FAM005234		Helsinki	Helsinki		YES	YES	YES	21.72	Male	B1
BICH000005	Bichon Frise	Breed_Dogs	SAMN20151387	SRR15100193	BIF548	FAM005235		Helsinki	Helsinki		YES	YES	YES	20.28	Female	B1
BICH000006	Havanese	Breed_Dogs	SAMN19522757	SRR14750517	FAM006515	2-ADN3971		Rennes	Michigan		YES	YES	YES	18.17	Male	A1
BICH000007	Bichon Frise	Breed_Dogs	SAMN19522758	SRR14750518	FAM005905	2-ADN1085		Rennes	Michigan		YES	YES	YES	18.94	Male	A1
BILL000001	Billy	Breed_Dogs	SAMN19522759	SRR14750519	FAM005926	2-ADN11992		Rennes	Michigan		YES	YES	YES	17.11	Male	A1
BILL000002	Billy	Breed_Dogs	SAMN19522760	SRR14750520	FAM006568	2-ADN7741		Rennes	Michigan		YES	YES	YES	19.24	Male	A1
BLDH000001	Bloodhound	Breed_Dogs	SAMN21035064	SRR16048795	VIH002A1	FAM005870		Helsinki	Helsinki		YES	YES	YES	17.86	Male	B1
BLDH000002	Bloodhound	Breed_Dogs	SAMN21035065	SRR16048784	VIH010A1	FAM005871		Helsinki	Helsinki		YES	YES	YES	20.66	Male	B1
BLDH000003	Bloodhound	Breed_Dogs	SAMN19522761	SRR14750521	FAM005952	2-ADN13199		Rennes	Michigan		YES	YES	YES	18.76	Male	A5
BLDH000004	Bloodhound	Breed_Dogs	SAMN19522762	SRR14750523	FAM006615	3-ADNPR3987		Rennes	Michigan		YES	YES	YES	18.16	Male	B1
BLNK000001	Russian Tsvetnaya Bolonka	Breed_Dogs	SAMN21036255	SRR15734675	BZ016	FAM005482		Bern	Bern		YES	YES	YES	18.52	Male	A1
BLNK000002	Russian Tsvetnaya Bolonka	Breed_Dogs	SAMN21036256	SRR15734674	BZ017	FAM005483		Bern	Bern		YES	YES	YES	20.14	Female	A1
BLNK000003	Russian Tsvetnaya Bolonka	Breed_Dogs	SAMN21036257	SRR15734673	BZ023	FAM005484		Bern	Bern		YES	YES	YES	18.35	Female	A1
BLNK000004	Russian Tsvetnaya Bolonka	Breed_Dogs	SAMN21036258	SRR15734672	BZ028	FAM005485		Bern	Bern		YES	YES	YES	17.85	Female	A1
BLNK000005	Russian Tsvetnaya Bolonka	Breed_Dogs	SAMN21035066	SRR16048773	VB002A1	FAM005864		Helsinki	Helsinki		YES	YES	YES	20.18	Male	A1
BLNK000006	Russian Tsvetnaya Bolonka	Breed_Dogs	SAMN21035067	SRR16048762	VB004A1	FAM005865		Helsinki	Helsinki		YES	YES	YES	22.37	Male	B1
BLPS000001	Blue Picardy Spaniel	Breed_Dogs	SAMN21035068	SRR16048751	SPS005A1	FAM006782		Helsinki	Helsinki		YES	YES	YES	17.49	Male	A1
BLPS000002	Blue Picardy Spaniel	Breed_Dogs	SAMN21035069	SRR16048737	SPS008A1	FAM006783		Helsinki	Helsinki		YES	YES	YES	17.74	Male	A1
BLPS000003	Blue Picardy Spaniel	Breed_Dogs	SAMN21035070	SRR16048725	SPS009A1	FAM006784		Helsinki	Helsinki		YES	YES	YES	19.01	Male	A1
BLUE000001	Bluetick Coonhound	Breed_Dogs	SAMN29845196	SRR20326575	FAM007432	20859		Cornell	Uppsala		YES	YES	YES	19.05	Male	A1
BLUE000002	Bluetick Coonhound	Breed_Dogs	SAMN29845197	SRR20326560	FAM007433	14323		Cornell	Uppsala		YES	YES	YES	20.06	Female	A1
BLUE000003	Unknown	Breed_Dogs	SAMN29845198	SRR20326321	FAM007434	11335		Cornell	Uppsala		YES	NO	NO	19.92	Male	NotApplicable
BMAL000001	Belgian Malinois	Breed_Dogs	SAMN15625737	SRR12330077	FAM007314	24233		NHGRI	Uppsala		YES	YES	YES	19.73	Female	C1
BMAL000002	Belgian Malinois	Breed_Dogs	SAMN15625738	SRR12330076	FAM007222	25490		NHGRI	Michigan		YES	YES	YES	18.37	Male	A1
BMAL000003	Belgian Malinois	Breed_Dogs	SAMN21036375	SRR15734648	CRR033510	MA325	FAM005607	Bern	Bern	sample swap fixed	YES	YES	YES	19.55	Male	B1
BMAL000004	Belgian Malinois	Breed_Dogs	SAMN20151400	SRR15100179	BPM224	FAM005248		Helsinki	Helsinki		YES	YES	YES	17.6	Female	A1
BMSH000001	Bavarian Mountain Scent Hound	Breed_Dogs	SAMN21036222	SRR15734705	BG029	FAM005557		Bern	Bern		YES	YES	YES	18.43	Male	A1
BMSH000002	Bavarian Mountain Scent Hound	Breed_Dogs	SAMN21036223	SRR15734704	BG054	FAM005558		Bern	Bern		YES	YES	YES	18.77	Female	A1
BMSH000003	Bavarian Mountain Scent Hound	Breed_Dogs	SAMN21036224	SRR15734703	BG067	FAM005559		Bern	Bern		YES	YES	YES	18.68	Male	A1
BMSH000004	Bavarian Mountain Scent Hound	Breed_Dogs	SAMN21036225	SRR15734702	BG139	FAM005560		Bern	Bern		YES	YES	YES	18.41	Female	A1
BMSH000005	Bavarian Mountain Scent Hound	Breed_Dogs	SAMN21035071	SRR16048713	BVV001A1	FAM006685		Helsinki	Helsinki		YES	YES	YES	16.71	Male	A1
BMSH000006	Bavarian Mountain Scent Hound	Breed_Dogs	SAMN21035072	SRR16048702	BVV002A1	FAM006686		Helsinki	Helsinki		YES	YES	YES	19.49	Female	A1
BODA000001	Bouvier des Ardennes	Breed_Dogs	SAMN20151376	SRR15100205	BDA001	FAM005224		Helsinki	Helsinki		YES	YES	YES	19.14	Female	B1
BOER000001	Boerboel	Breed_Dogs	SAMN15625739	SRR12330075	FAM007318	21873		NHGRI	Uppsala		YES	YES	YES	17.71	Female	A1
BOER000002	Boerboel	Breed_Dogs	SAMN15625740	SRR12330074	FAM007319	33148		NHGRI	Uppsala		YES	YES	YES	20.01	Male	A1
BOER000003	Boerboel	Breed_Dogs	SAMN29845199	SRR20326434	FAM007435	3903		Cornell	Uppsala		YES	YES	YES	18.75	Female	A1
BOER000004	Boerboel	Breed_Dogs	SAMN29845200	SRR20326278	FAM007436	7004		Cornell	Uppsala		YES	YES	YES	18.55	Male	A1
BOER000005	Boerboel	Breed_Dogs	SAMN29845201	SRR20326267	FAM007437	10784		Cornell	Uppsala		NO	NO	NO	18.86	Male	NotApplicable
BOLO000001	Bolognese	Breed_Dogs	SAMN21035073	SRR16048691	BOL006A1	FAM006680		Helsinki	Helsinki		NO	NO	NO	17.67	Female	NotApplicable
BOLO000002	Bolognese	Breed_Dogs	SAMN21035074	SRR16048680	BOL014A1	FAM006681		Helsinki	Helsinki		YES	YES	YES	17.56	Female	A1
BOLO000003	Bolognese	Breed_Dogs	SAMN21035075	SRR16048669	BOL017A1	FAM006682		Helsinki	Helsinki		YES	YES	YES	16.27	Female	A1
BOLO000004	Bolognese	Breed_Dogs	SAMN21035076	SRR16048658	BOL020A1	FAM006683		Helsinki	Helsinki		YES	YES	YES	21.14	Male	B1
BOLO000005	Bolognese	Breed_Dogs	SAMN21035077	SRR16048619	BOL022A1	FAM006684		Helsinki	Helsinki		YES	YES	YES	18.47	Female	A1
BOLO000006	Bolognese	Breed_Dogs	SAMN21035078	SRR16048608	BOL016A1	FAM006816		Helsinki	Helsinki		YES	YES	YES	22.52	Male	B1
BOPD000001	Bourbonnais Pointing Dog	Breed_Dogs	SAMN21035079	SRR16048597	BBS001A1	FAM006675		Helsinki	Helsinki		YES	YES	YES	20.15	Female	A1
BOPD000002	Bourbonnais Pointing Dog	Breed_Dogs	SAMN21035080	SRR16048558	BBS004A1	FAM006676		Helsinki	Helsinki		YES	YES	YES	23.33	Male	A1
BOPD000003	Bourbonnais Pointing Dog	Breed_Dogs	SAMN21035081	SRR16048546	BBS005A1	FAM006677		Helsinki	Helsinki		YES	YES	YES	17.23	Female	B1
BOPD000004	Bourbonnais Pointing Dog	Breed_Dogs	SAMN21035082	SRR16048535	BBS006A1	FAM006678		Helsinki	Helsinki		YES	YES	YES	17.53	Female	A1
BOPD000005	Bourbonnais Pointing Dog	Breed_Dogs	SAMN21035083	SRR16048524	BBS007A1	FAM006679		Helsinki	Helsinki		NO	NO	NO	19.88	Male	NotApplicable
BOPD000006	Bourbonnais Pointing Dog	Breed_Dogs	SAMN19522763	SRR14750524	FAM005962	3-ADN1381		Rennes	Michigan		YES	YES	YES	20.36	Female	A1
BOPD000007	Bourbonnais Pointing Dog	Breed_Dogs	SAMN19522764	SRR14750525	FAM006581	4-ADN85_1		Rennes	Michigan		YES	YES	YES	19.88	Male	A1
BOPD000008	Bourbonnais Pointing Dog	Breed_Dogs	SAMN19522765	SRR14750526	FAM006589	5-ADN89_1		Rennes	Michigan		YES	YES	YES	17.42	Female	A1
BOST000001	Boston Terrier	Breed_Dogs	SAMN21036241	SRR15734684	BN019	FAM005561		Bern	Bern		YES	YES	YES	19.03	Female	A1
BOST000002	Boston Terrier	Breed_Dogs	SAMN20151393	SRR15100186	BOS011	FAM005241		Helsinki	Helsinki		YES	YES	YES	17.78	Male	A1
BOST000003	Boston Terrier	Breed_Dogs	SAMN20151394	SRR15100185	BOS034	FAM005242		Helsinki	Helsinki		YES	YES	YES	20.6	Male	A1
BOUV000001	Bouvier des Flandres	Breed_Dogs	SAMN15625741	SRR12330072	FAM007095	15380		NHGRI	Michigan		YES	YES	YES	20.87	Male	C1
BOUV000002	Bouvier des Flandres	Breed_Dogs	SAMN15625742	SRR12330071	FAM007105	22254		NHGRI	Michigan		YES	YES	YES	20.31	Male	C1
BOXR000001	Boxer	Breed_Dogs	SAMN15625743	SRR12330070	FAM007214	21522		NHGRI	Michigan		YES	YES	YES	21.91	Female	A1
BOXR000002	Boxer	Breed_Dogs	SAMN15625744	SRR12330069	FAM007236	27749		NHGRI	Michigan		YES	YES	YES	20.22	Male	A1
BOXR000003	Boxer	Breed_Dogs	SAMN21036275	SRR15734886	DB004	FAM005489		Bern	Bern		YES	YES	YES	17.54	Female	C2
BOXR000004	Boxer	Breed_Dogs	SAMN20151369	SRR15100213	B376	FAM005217		Helsinki	Helsinki		YES	YES	YES	17.58	Male	C2
BOXR000005	Boxer	Breed_Dogs	SAMN20151370	SRR15100212	B413	FAM005218		Helsinki	Helsinki		YES	YES	YES	21.83	Male	A1
BOYK000001	Boykin Spaniel	Breed_Dogs	SAMN15625745	SRR12330068	FAM007320	9911		NHGRI	Uppsala		YES	YES	YES	16.71	Male	A1
BOYK000002	Boykin Spaniel	Breed_Dogs	SAMN15625746	SRR12330067	FAM007063	9997		NHGRI	Michigan		YES	YES	YES	20.55	Male	A1
BOYK000003	Boykin Spaniel	Breed_Dogs	SAMN15625747	SRR12330066	FAM007064	9998		NHGRI	Michigan		YES	YES	YES	20.83	Male	A1
BOYK000004	Boykin Spaniel	Breed_Dogs	SAMN15625748	SRR12330065	FAM007321	10012		NHGRI	Uppsala		YES	YES	YES	16.44	Female	A1
BOYK000005	Boykin Spaniel	Breed_Dogs	SAMN15625749	SRR12330064	FAM007065	10013		NHGRI	Michigan		YES	YES	YES	19.79	Male	A1
BRAC000001	Bracco Italiano	Breed_Dogs	SAMN20151407	SRR15100171	BRI002	FAM005255		Helsinki	Helsinki		YES	YES	YES	22.11	Female	A1
BRAC000002	Bracco Italiano	Breed_Dogs	SAMN20151408	SRR15100170	BRI004	FAM005256		Helsinki	Helsinki		YES	YES	YES	16.98	Female	A1
BRAC000003	Bracco Italiano	Breed_Dogs	SAMN20151409	SRR15100169	BRI005	FAM005257		Helsinki	Helsinki		YES	YES	YES	18.91	Female	A1
BRAC000004	Bracco Italiano	Breed_Dogs	SAMN20151410	SRR15100168	BRI011	FAM005258		Helsinki	Helsinki		YES	YES	YES	20.8	Male	A1
BRAC000005	Bracco Italiano	Breed_Dogs	SAMN20151411	SRR15100167	BRI015	FAM005259		Helsinki	Helsinki		YES	YES	YES	19.26	Male	A1
BRAC000006	Bracco Italiano	Breed_Dogs	SAMN20151412	SRR15100166	BRI017	FAM005260		Helsinki	Helsinki		YES	YES	YES	19.62	Female	A1
BRBT000001	Barbet	Breed_Dogs	SAMN21036210	SRR15734712	BA038	FAM005555		Bern	Bern		YES	YES	YES	19.54	Male	C2
BRBT000002	Barbet	Breed_Dogs	SAMN21036211	SRR15734711	BA073	FAM005556		Bern	Bern		YES	YES	YES	18.27	Male	B1
BRBT000003	Barbet	Breed_Dogs	SAMN20151371	SRR15100211	BAR156	FAM005219		Helsinki	Helsinki		YES	YES	YES	19.65	Female	C2
BRBT000004	Barbet	Breed_Dogs	SAMN20151372	SRR15100210	BAR447	FAM005220		Helsinki	Helsinki		YES	YES	YES	22.64	Female	A1
BRBT000005	Barbet	Breed_Dogs	SAMN19522766	SRR14750527	FAM005938	2-ADN12527		Rennes	Michigan		YES	YES	YES	17.31	Female	C2
BRBT000006	Barbet	Breed_Dogs	SAMN19522767	SRR14750528	FAM005939	2-ADN12528		Rennes	Michigan		YES	YES	YES	16.87	Female	C2
BRFR000001	Braques Francais	Breed_Dogs	SAMN19522768	SRR14750529	FAM005902	3-ADN10715		Rennes	Michigan		YES	YES	YES	19.15	Female	A1
BRFR000002	Braques Francais	Breed_Dogs	SAMN19522769	SRR14750530	FAM005986	3-ADN2281		Rennes	Michigan		YES	YES	YES	18.89	Male	A1
BRFR000003	Braques Francais	Breed_Dogs	SAMN19522770	SRR14750531	FAM006507	3-ADN3499		Rennes	Michigan		YES	YES	YES	19.28	Male	A1
BRFR000004	Braques Francais	Breed_Dogs	SAMN19522771	SRR14750532	FAM006522	3-ADN4103		Rennes	Michigan		YES	YES	YES	18.64	Male	A1
BRFR000005	Braques Francais	Breed_Dogs	SAMN19522772	SRR14750534	FAM006587	3-ADN8787		Rennes	Michigan		YES	YES	YES	28.02	Male	A1
BRGV000001	Briquet Griffon Vendeen	Breed_Dogs	SAMN19522773	SRR14750535	FAM005903	3-ADN1083		Rennes	Michigan		YES	YES	YES	17.39	Male	B1
BRGV000002	Briquet Griffon Vendeen	Breed_Dogs	SAMN19522774	SRR14750536	FAM005996	3-ADN3012		Rennes	Michigan		YES	YES	YES	18.58	Male	A1
BRHM000001	Broholmer	Breed_Dogs	SAMN20151413	SRR15100164	BRO003	FAM005261		Helsinki	Helsinki		YES	YES	YES	21.76	Male	A1
BRHM000002	Broholmer	Breed_Dogs	SAMN20151414	SRR15100163	BRO004	FAM005262		Helsinki	Helsinki		YES	YES	YES	22.03	Female	A1
BRHM000003	Broholmer	Breed_Dogs	SAMN20151415	SRR15100162	BRO017	FAM005263		Helsinki	Helsinki		YES	YES	YES	22.66	Female	A1
BRHM000004	Broholmer	Breed_Dogs	SAMN20151416	SRR15100161	BRO032	FAM005264		Helsinki	Helsinki		YES	YES	YES	17.41	Female	A1
BRHM000005	Broholmer	Breed_Dogs	SAMN20151417	SRR15100160	BRO045	FAM005265		Helsinki	Helsinki		YES	YES	YES	18.98	Female	A1
BRHM000006	Broholmer	Breed_Dogs	SAMN20151418	SRR15100159	BRO047	FAM005266		Helsinki	Helsinki		YES	YES	YES	20.69	Male	A1
BRIA000001	Briard	Breed_Dogs	SAMN15625750	SRR12330063	FAM007094	15126		NHGRI	Michigan		YES	YES	YES	17.33	Female	A1
BRIA000002	Briard	Breed_Dogs	SAMN15625751	SRR12330061	FAM007101	20209		NHGRI	Michigan		YES	YES	YES	17.96	Female	B1
BRIA000003	Briard	Breed_Dogs	SAMN15625752	SRR12330060	FAM007102	20268		NHGRI	Michigan		YES	YES	YES	18.91	Female	B1
BRIA000004	Briard	Breed_Dogs	SAMN21036242	SRR15734683	BR020	FAM005481		Bern	Bern		YES	YES	YES	19.42	Female	A1
BRIA000005	Briard	Breed_Dogs	SAMN20151403	SRR15100175	BR082	FAM005251		Helsinki	Helsinki		YES	YES	YES	20.96	Male	A1
BRIA000006	Briard	Breed_Dogs	SAMN19522775	SRR14750537	FAM005941	2-ADN12571		Rennes	Michigan		YES	YES	YES	16.46	Female	B1
BRIA000007	Briard	Breed_Dogs	SAMN19522776	SRR14750538	FAM006536	2-ADN5010		Rennes	Michigan		NO	NO	NO	19.77	Female	NotApplicable
BRIT000001	Brittany	Breed_Dogs	SAMN15625753	SRR12330059	FAM007322	12726		NHGRI	Uppsala		YES	YES	YES	16.52	Female	A1
BRIT000002	Brittany	Breed_Dogs	SAMN15625754	SRR12330058	FAM007174	33265		NHGRI	Michigan		YES	YES	YES	19.83	Male	A1
BRIT000003	Brittany	Breed_Dogs	SAMN20151404	SRR15100174	BRE002	FAM005252		Helsinki	Helsinki		YES	YES	YES	18.21	Male	A1
BRIT000004	Brittany	Breed_Dogs	SAMN20151405	SRR15100173	BRE010	FAM005253		Helsinki	Helsinki		YES	YES	YES	19.73	Male	A1
BRIT000005	Brittany	Breed_Dogs	SAMN20151406	SRR15100172	BRE032	FAM005254		Helsinki	Helsinki		YES	YES	YES	20.62	Female	A1
BRIT000006	Brittany	Breed_Dogs	SAMN19522777	SRR14750539	FAM005918	2-ADN11518		Rennes	Michigan		YES	YES	YES	19.91	Female	A1
BRIT000007	Brittany	Breed_Dogs	SAMN19522778	SRR14750540	FAM005950	2-ADN12874		Rennes	Michigan		YES	YES	YES	17.53	Male	A1
BRIT000008	Brittany	Breed_Dogs	SAMN19522779	SRR14750389	FAM006513	2-ADN3952		Rennes	Michigan		YES	YES	YES	18.15	Male	A1
BRJH000001	Bruno Jura Hound	Breed_Dogs	SAMN19522780	SRR14750390	FAM005909	2-ADN1103		Rennes	Michigan		YES	YES	YES	20.6	Male	B1
BRJH000002	Bloodhound	Breed_Dogs	SAMN19522781	SRR14750391	FAM005956	2-ADN13524		Rennes	Michigan		YES	YES	YES	17.69	Male	A1
BRJH000003	Bruno Jura Hound	Breed_Dogs	SAMN19522782	SRR14750393	FAM005961	2-ADN13804		Rennes	Michigan		YES	YES	YES	19.18	Male	A1
BRJH000004	Bruno Jura Hound	Breed_Dogs	SAMN19522783	SRR14750394	FAM005981	2-ADN2110		Rennes	Michigan		YES	YES	YES	18.09	Male	A1
BRJH000005	Bruno Jura Hound	Breed_Dogs	SAMN19522784	SRR14750395	FAM005995	2-ADN2828		Rennes	Michigan		YES	YES	YES	20.51	Female	B1
BRJH000006	Bruno Jura Hound	Breed_Dogs	SAMN19522785	SRR14750396	FAM006524	2-ADN4175		Rennes	Michigan		YES	YES	YES	19.37	Male	B1
BRMD000001	Bernese Mountain Dog	Breed_Dogs	SAMN15625755	SRR12330057	FAM007293	33589		NHGRI	Michigan		YES	YES	YES	20.49	Female	A1
BRMD000002	Bernese Mountain Dog	Breed_Dogs	SAMN15625756	SRR12330056	FAM007316	34297		NHGRI	Uppsala		YES	YES	YES	16.37	Female	A1
BRMD000003	Bernese Mountain Dog	Breed_Dogs	SAMN21036248	SRR15734682	BS588	FAM005562		Bern	Bern		YES	YES	YES	20.83	Female	A1
BRMD000004	Bernese Mountain Dog	Breed_Dogs	SAMN19522786	SRR14750397	FAM006599	2-ADN9481		Rennes	Michigan		YES	YES	YES	20.41	Female	A1
BRMD000005	Bernese Mountain Dog	Breed_Dogs	SAMN21036244	SRR16289019	BS339	FAM004618		Bern	Uppsala		YES	YES	YES	20.82	Male	A1
BRMD000006	Bernese Mountain Dog	Breed_Dogs	SAMN21036245	SRR16289018	BS379	FAM004619		Bern	Uppsala		YES	YES	YES	27.04	Male	A1
BRMD000007	Bernese Mountain Dog	Breed_Dogs	SAMN21036246	SRR16289017	BS397	FAM004620		Bern	Uppsala		YES	YES	YES	24.38	Female	A1
BRMD000008	Bernese Mountain Dog	Breed_Dogs	SAMN21036247	SRR16289016	BS399	FAM004621		Bern	Uppsala		YES	YES	YES	18.22	Female	A1
BRMD000009	Bernese Mountain Dog	Breed_Dogs	SAMN21036249	SRR16289015	BS652	FAM004622		Bern	Uppsala		YES	YES	YES	17.76	Female	A1
BRMD000010	Bernese Mountain Dog	Breed_Dogs	SAMN21036243	SRR16289020	BS1716	FAM004623		Bern	Uppsala		YES	YES	YES	24.8	Female	A1
BRTR000001	Black Russian Terrier	Breed_Dogs	SAMN21036501	SRR15734763	ST001	FAM005457		Bern	Bern		YES	YES	YES	20.17	Female	A1
BRTR000002	Black Russian Terrier	Breed_Dogs	SAMN21035084	SRR16048513	MT038A1	FAM005701		Helsinki	Helsinki		YES	YES	YES	20.19	Male	A1
BRTR000003	Black Russian Terrier	Breed_Dogs	SAMN21035085	SRR16048446	MT051A1	FAM005702		Helsinki	Helsinki		YES	YES	YES	17.6	Male	A1
BRTR000004	Black Russian Terrier	Breed_Dogs	SAMN21035086	SRR16048889	MT065A1	FAM005703		Helsinki	Helsinki		YES	YES	YES	18.22	Female	A1
BRTR000005	Black Russian Terrier	Breed_Dogs	SAMN21035087	SRR16048883	MT071A1	FAM005704		Helsinki	Helsinki		YES	YES	YES	18.89	Male	A1
BRUS000001	Brussels Griffon	Breed_Dogs	SAMN15625757	SRR12330055	FAM007324	3036		NHGRI	Uppsala		YES	YES	YES	17.9	Male	A1
BRUS000002	Brussels Griffon	Breed_Dogs	SAMN15625758	SRR12330054	FAM007187	6033		NHGRI	Michigan		YES	YES	YES	18.06	Female	A1
BRUS000003	Brussels Griffon	Breed_Dogs	SAMN15625759	SRR12330053	FAM007189	6692		NHGRI	Michigan		YES	YES	YES	20.38	Female	A1
BRUS000004	Brussels Griffon	Breed_Dogs	SAMN15625760	SRR12330052	FAM007210	15571		NHGRI	Michigan		YES	YES	YES	18.51	Female	A1
BRUS000005	Brussels Griffon	Breed_Dogs	SAMN15625761	SRR12330050	FAM007213	21511		NHGRI	Michigan		YES	YES	YES	19.62	Female	A1
BRUS000006	Brussels Griffon	Breed_Dogs	SAMN15625762	SRR12330049	FAM007250	31228		NHGRI	Michigan		YES	YES	YES	17.46	Male	A1
BRUS000007	Brussels Griffon	Breed_Dogs	SAMN21035088	SRR16048882	GRI080A1	FAM005346		Helsinki	Helsinki		YES	YES	YES	18.17	Female	B1
BRZT000001	Brazilian Terrier	Breed_Dogs	SAMN20151419	SRR15100158	BRT238	FAM005267		Helsinki	Helsinki		YES	YES	YES	19.46	Female	C2
BRZT000002	Brazilian Terrier	Breed_Dogs	SAMN20151420	SRR15100157	BRT243	FAM005268		Helsinki	Helsinki		YES	YES	YES	20.96	Male	A1
BRZT000003	Brazilian Terrier	Breed_Dogs	SAMN20151421	SRR15100156	BRT245	FAM005269		Helsinki	Helsinki		YES	YES	YES	20.38	Male	C2
BRZT000004	Brazilian Terrier	Breed_Dogs	SAMN20151422	SRR15100155	BRT246	FAM005270		Helsinki	Helsinki		YES	YES	YES	23.48	Female	C2
BRZT000005	Brazilian Terrier	Breed_Dogs	SAMN19522787	SRR14750398	FAM005980	2-ADN2105		Rennes	Michigan		YES	YES	YES	18.46	Male	C2
BRZT000006	Brazilian Terrier	Breed_Dogs	SAMN19522788	SRR14750399	FAM006561	2-ADN6960		Rennes	Michigan		YES	YES	YES	19.25	Male	C2
BTAN000001	Black and Tan Coonhound	Breed_Dogs	SAMN21035089	SRR16048881	UPO001A1	FAM005848		Helsinki	Helsinki		YES	YES	YES	19.07	Male	A1
BULD000001	French Bulldog	Breed_Dogs	SAMN21036289	SRR15734878	EB001	FAM005410		Bern	Bern		YES	YES	YES	18.12	Male	A1
BULD000002	English Bulldog	Breed_Dogs	SAMN20151480	SRR15100239	EBD129A1	FAM005328		Helsinki	Helsinki		YES	YES	YES	21.01	Female	B1
BULD000003	English Bulldog	Breed_Dogs	SAMN20151481	SRR15100238	EBD153	FAM005329		Helsinki	Helsinki		YES	YES	YES	21.28	Female	C2
BULM000001	Bullmastiff	Breed_Dogs	SAMN15625763	SRR12330048	FAM007175	1125		NHGRI	Michigan		YES	YES	YES	19.62	Female	A1
BULM000002	Bullmastiff	Breed_Dogs	SAMN15625764	SRR12330047	FAM007224	26414		NHGRI	Michigan		YES	YES	YES	20.2	Male	A1
BULM000003	Bullmastiff	Breed_Dogs	SAMN21036251	SRR15734680	BU002	FAM005403		Bern	Bern		YES	YES	YES	18.12	Male	A1
BULM000004	Bullmastiff	Breed_Dogs	SAMN21036252	SRR15734679	BU003	FAM005404		Bern	Bern		YES	YES	YES	17.09	Female	A1
BULM000005	Bullmastiff	Breed_Dogs	SAMN20151391	SRR15100189	BM029	FAM005239		Helsinki	Helsinki		YES	YES	YES	22.19	Female	A1
BULM000006	Bullmastiff	Breed_Dogs	SAMN20151392	SRR15100188	BM036	FAM005240		Helsinki	Helsinki		YES	YES	YES	17.47	Female	A1
BULT000001	Bull Terrier	Breed_Dogs	SAMN15625765	SRR12330046	FAM007323	23713		NHGRI	Uppsala		YES	YES	YES	17.36	Male	B1
BULT000002	Bull Terrier	Breed_Dogs	SAMN21036250	SRR15734681	BT017	FAM005563		Bern	Bern		YES	YES	YES	19.4	Female	B1
BULT000003	Bull Terrier	Breed_Dogs	SAMN20151426	SRR15100150	BUL198	FAM005274		Helsinki	Helsinki		YES	YES	YES	20.31	Male	A1
BULT000004	Bull Terrier	Breed_Dogs	SAMN20151427	SRR15100149	BUL207	FAM005275		Helsinki	Helsinki		YES	YES	YES	18.79	Female	A1
BWRT000001	Biewer Terrier	Breed_Dogs	SAMN15625766	SRR12330045	FAM007251	31246		NHGRI	Michigan		YES	YES	YES	15.19	Female	A1
BWRT000002	Biewer Terrier	Breed_Dogs	SAMN15625767	SRR12330044	FAM007252	31247		NHGRI	Michigan		YES	YES	YES	19.96	Male	C2
BWRT000003	Biewer Terrier	Breed_Dogs	SAMN15625768	SRR12330043	FAM007253	31248		NHGRI	Michigan		YES	YES	YES	16.78	Male	A1
BWRT000004	Biewer Terrier	Breed_Dogs	SAMN15625769	SRR12330042	FAM007254	31253		NHGRI	Michigan		YES	YES	YES	16	Male	C2
BWRT000005	Biewer Terrier	Breed_Dogs	SAMN15625770	SRR12330041	FAM007256	31256		NHGRI	Michigan		YES	YES	YES	15.53	Female	A1
BWRT000006	Biewer Terrier	Breed_Dogs	SAMN15625771	SRR12330039	FAM007317	34303		NHGRI	Uppsala		YES	YES	YES	18.44	Male	A1
CAAN000001	Canaan Dog	Breed_Dogs	SAMN21035090	SRR16048880	KAA001A1	FAM005375		Helsinki	Helsinki		YES	YES	YES	21.96	Female	B1
CAAN000002	Canaan Dog	Breed_Dogs	SAMN21035091	SRR16048878	KAA005A1	FAM005376		Helsinki	Helsinki		YES	YES	YES	24.23	Female	A1
CAIR000001	Cairn Terrier	Breed_Dogs	SAMN15625772	SRR12330038	FAM007325	25446		NHGRI	Uppsala		YES	YES	YES	16.68	Male	A1
CAIR000002	Cairn Terrier	Breed_Dogs	SAMN21036262	SRR15734668	CE024	FAM005567		Bern	Bern		YES	YES	YES	26.66	Male	C2
CAIR000003	Cairn Terrier	Breed_Dogs	SAMN21036263	SRR15734667	CE057	FAM005568		Bern	Bern		YES	YES	YES	16.97	Female	A1
CAIR000004	Cairn Terrier	Breed_Dogs	SAMN20151460	SRR15100261	CT014A1	FAM005308		Helsinki	Helsinki		YES	YES	YES	20.67	Male	A1
CAIR000005	Cairn Terrier	Breed_Dogs	SAMN20151461	SRR15100260	CT060A1	FAM005309		Helsinki	Helsinki		YES	YES	YES	20.68	Female	C2
CANM000001	Dogo Canario	Breed_Dogs	SAMN20151463	SRR15100257	DC007A1	FAM005311		Helsinki	Helsinki		YES	YES	YES	17.32	Female	A1
CANM000002	Dogo Canario	Breed_Dogs	SAMN20151464	SRR15100256	DC015A1	FAM005312		Helsinki	Helsinki		YES	YES	YES	21.28	Male	A1
CANM000003	Dogo Canario	Breed_Dogs	SAMN20151465	SRR15100255	DC027A1	FAM005313		Helsinki	Helsinki		YES	YES	YES	19.61	Female	A1
CANM000004	Dogo Canario	Breed_Dogs	SAMN19522789	SRR14750400	FAM006540	2-ADN5355		Rennes	Michigan		YES	YES	YES	19.32	Female	A1
CANM000005	Dogo Canario	Breed_Dogs	SAMN19522790	SRR14750401	FAM006541	2-ADN5368		Rennes	Michigan		YES	YES	YES	18.02	Female	A1
CANM000006	Dogo Canario	Breed_Dogs	SAMN19522791	SRR14750402	FAM006556	2-ADN6509		Rennes	Michigan		YES	YES	YES	23.72	Female	A1
CARD000001	Cardigan Welsh Corgi	Breed_Dogs	SAMN15625773	SRR12330037	FAM007059	9284		NHGRI	Michigan		YES	YES	YES	19.39	Female	A1
CARD000002	Schipperke	Breed_Dogs	SAMN15625774	SRR12330036	FAM007167	33150		NHGRI	Michigan		YES	YES	YES	17	Female	A1
CARD000003	Cardigan Welsh Corgi	Breed_Dogs	SAMN15625775	SRR12330035	FAM007171	33212		NHGRI	Michigan		YES	YES	YES	21	Male	A1
CARD000004	Cardigan Welsh Corgi	Breed_Dogs	SAMN19522792	SRR14750404	FAM005942	2-ADN12597		Rennes	Michigan		YES	YES	YES	19.84	Male	B1
CARD000005	Cardigan Welsh Corgi	Breed_Dogs	SAMN19522793	SRR14750405	FAM005943	2-ADN12599		Rennes	Michigan		YES	YES	YES	19.95	Female	B1
CARO000001	Carolina Dog	Mixed/Other	SAMN15625776	SRR12330034	FAM007326	7771		NHGRI	Uppsala		YES	YES	YES	18.19	Female	A5
CARO000002	Carolina Dog	Mixed/Other	SAMN15625777	SRR12330033	FAM007327	31703		NHGRI	Uppsala		YES	YES	YES	19.61	Female	A1
CARO000003	Carolina Dog	Mixed/Other	SAMN15625778	SRR12330032	FAM007328	31707		NHGRI	Uppsala		YES	YES	YES	16.03	Female	A5
CASD000001	Central Asian Shepherd Dog	Breed_Dogs	SAMN21035092	SRR16048877	KEP018A1	FAM005644		Helsinki	Helsinki		YES	YES	YES	20.3	Male	C1
CASD000002	Central Asian Shepherd Dog	Breed_Dogs	SAMN21035093	SRR16048876	KEP020A1	FAM005645		Helsinki	Helsinki		YES	YES	YES	17.46	Female	C1
CASD000003	Central Asian Shepherd Dog	Breed_Dogs	SAMN21035094	SRR16048875	KEP034A1	FAM005646		Helsinki	Helsinki		YES	YES	YES	17.53	Female	A1
CAUC000001	Caucasian Ovcharka	Breed_Dogs	SAMN15625779	SRR12330031	FAM007334	7997		NHGRI	Uppsala		YES	YES	YES	18.4	Female	D2
CAUC000002	Caucasian Ovcharka	Breed_Dogs	SAMN21035095	SRR16048874	KAP027A1	FAM005377		Helsinki	Helsinki		YES	YES	YES	21.12	Female	B1
CAUC000003	Caucasian Ovcharka	Breed_Dogs	SAMN21035096	SRR16048873	KAP029A1	FAM005378		Helsinki	Helsinki		YES	YES	YES	20.65	Male	A1
CAUC000004	Caucasian Ovcharka	Breed_Dogs	SAMN21035097	SRR16048872	KAP051A3	FAM005379		Helsinki	Helsinki		YES	YES	YES	17.4	Female	A1
CCRT000001	Curly-Coated Retriever	Breed_Dogs	SAMN21036269	SRR15734893	CR002	FAM005571		Bern	Bern		YES	YES	YES	17.75	Female	A1
CCRT000002	Curly-Coated Retriever	Breed_Dogs	SAMN21036270	SRR15734892	CR034	FAM005572		Bern	Bern		YES	YES	YES	19.3	Female	A1
CCRT000003	Curly-Coated Retriever	Breed_Dogs	SAMN21035098	SRR16048871	KKN193A1	FAM005655		Helsinki	Helsinki		YES	YES	YES	19.51	Male	A1
CCRT000004	Curly-Coated Retriever	Breed_Dogs	SAMN21035099	SRR16048870	KKN194A1	FAM005656		Helsinki	Helsinki		YES	YES	YES	20.01	Male	A1
CFOU000001	Cesky Fousek	Breed_Dogs	SAMN20151457	SRR15100264	CSS001A1	FAM005305		Helsinki	Helsinki		YES	YES	YES	18.29	Female	A1
CFOU000002	Cesky Fousek	Breed_Dogs	SAMN19522794	SRR14750406	FAM006502	4-ADN3234		Rennes	Michigan		YES	YES	YES	20.12	Female	A1
CFOU000003	Cesky Fousek	Breed_Dogs	SAMN19522795	SRR14750407	FAM006572	4-ADN8021		Rennes	Michigan		YES	YES	YES	18.86	Female	A1
CFOU000004	Cesky Fousek	Breed_Dogs	SAMN19522796	SRR14750408	FAM006621	4-ADNPR4573		Rennes	Michigan		YES	YES	YES	18.8	Female	A1
CHBR000001	Chesapeake Bay Retriever	Breed_Dogs	SAMN15625780	SRR12330030	FAM007339	7292		NHGRI	Uppsala		YES	YES	YES	18.24	Female	A1
CHBR000002	Chesapeake Bay Retriever	Breed_Dogs	SAMN15625781	SRR12330028	FAM007340	12347		NHGRI	Uppsala		YES	YES	YES	18	Male	A1
CHBR000003	Chesapeake Bay Retriever	Breed_Dogs	SAMN21036259	SRR15734671	CB001	FAM005405		Bern	Bern		YES	YES	YES	17.61	Female	A1
CHBR000004	Chesapeake Bay Retriever	Breed_Dogs	SAMN21036260	SRR15734670	CB002	FAM005406		Bern	Bern		YES	YES	YES	21.05	Male	A1
CHBR000005	Chesapeake Bay Retriever	Breed_Dogs	SAMN20151446	SRR15100276	CLN004A2	FAM005294		Helsinki	Helsinki		YES	YES	YES	17.19	Female	A1
CHIH000005	Chihuahua	Breed_Dogs	SAMN21036264	SRR15734666	CH004	FAM005569		Bern	Bern		YES	YES	YES	18.23	Female	B1
CHIH000006	Chihuahua	Breed_Dogs	SAMN20151438	SRR15100137	CHI287	FAM005286		Helsinki	Helsinki		YES	YES	YES	18.64	Male	A1
CHIN000001	Japanese Chin	Breed_Dogs	SAMN15625782	SRR12330027	FAM007200	12777		NHGRI	Michigan		YES	YES	YES	18.18	Male	B1
CHIN000003	Japanese Chin	Breed_Dogs	SAMN15625784	SRR12330025	FAM007359	24329		NHGRI	Uppsala		YES	YES	YES	18.64	Female	A1
CHIN000004	Japanese Chin	Breed_Dogs	SAMN15625785	SRR12330024	FAM007220	24956		NHGRI	Michigan		YES	YES	YES	16.33	Female	B1
CHIN000005	Japanese Chin	Breed_Dogs	SAMN21035100	SRR16048869	JCH002A1	FAM006729		Helsinki	Helsinki		YES	YES	YES	17.38	Female	B1
CHIN000006	Japanese Chin	Breed_Dogs	SAMN21035101	SRR16048867	JCH004A1	FAM006730		Helsinki	Helsinki		YES	YES	YES	19.06	Male	A1
CHIN000007	Japanese Chin	Breed_Dogs	SAMN21035102	SRR16048866	JCH015A1	FAM006731		Helsinki	Helsinki		YES	YES	YES	17.97	Female	B1
CHIN000008	Japanese Chin	Breed_Dogs	SAMN19522797	SRR14750409	FAM006595	4-ADN9116		Rennes	Michigan		NO	NO	NO	19.77	Male	NotApplicable
CHOW000001	Chow Chow	Breed_Dogs	SAMN15625786	SRR12330023	FAM007135	29846		NHGRI	Michigan		YES	YES	YES	19.52	Female	A1
CHOW000002	Chow Chow	Breed_Dogs	SAMN15625787	SRR12330022	FAM007136	30105		NHGRI	Michigan		YES	YES	YES	19.63	Male	A1
CHOW000003	Chow Chow	Breed_Dogs	SAMN15625788	SRR12330021	FAM007137	30210		NHGRI	Michigan		YES	YES	YES	18.42	Male	A1
CHOW000004	Chow Chow	Breed_Dogs	SAMN20151439	SRR15100136	CHO067A1	FAM005287		Helsinki	Helsinki		YES	YES	YES	20.52	Female	A1
CIRN000001	Cirneco dell'Etna	Breed_Dogs	SAMN15625789	SRR12330020	FAM007112	26441		NHGRI	Michigan		YES	YES	YES	18.25	Male	A1
CIRN000002	Cirneco dell'Etna	Breed_Dogs	SAMN15625790	SRR12330018	FAM007155	31283		NHGRI	Michigan		YES	YES	YES	18.54	Female	B1
CIRN000003	Cirneco dell'Etna	Breed_Dogs	SAMN15625791	SRR12330401	FAM007156	31284		NHGRI	Michigan		YES	YES	YES	17.54	Female	B1
CIRN000004	Cirneco dell'Etna	Breed_Dogs	SAMN20151431	SRR15100145	CDE038	FAM005279		Helsinki	Helsinki		YES	YES	YES	19.56	Female	A1
CIRN000005	Cirneco dell'Etna	Breed_Dogs	SAMN20151432	SRR15100144	CDE045	FAM005280		Helsinki	Helsinki		YES	YES	YES	18.29	Male	A1
CIRN000006	Cirneco dell'Etna	Breed_Dogs	SAMN20151433	SRR15100142	CDE074	FAM005281		Helsinki	Helsinki		YES	YES	YES	17.65	Female	A1
CKCS000001	Cavalier King Charles Spaniel	Breed_Dogs	SAMN15625792	SRR12330400	FAM007335	952		NHGRI	Uppsala		YES	YES	YES	16.56	Female	A1
CKCS000002	Cavalier King Charles Spaniel	Breed_Dogs	SAMN15625793	SRR12330399	FAM007336	15286		NHGRI	Uppsala		YES	YES	YES	16.14	Female	A1
CKCS000003	Cavalier King Charles Spaniel	Breed_Dogs	SAMN21036266	SRR15734896	CK128	FAM005570		Bern	Bern		YES	YES	YES	19.98	Female	A1
CKCS000004	Cavalier King Charles Spaniel	Breed_Dogs	SAMN20151429	SRR15100147	CAV345	FAM005277		Helsinki	Helsinki		YES	YES	YES	18.65	Male	A1
CKCS000005	Cavalier King Charles Spaniel	Breed_Dogs	SAMN20151430	SRR15100146	CAV390	FAM005278		Helsinki	Helsinki		YES	YES	YES	19.48	Female	A1
CLATUS000001	USA	Coyote	SAMN29845307	SRR20326496	YPi3838	LAT007001		KIZ	Michigan	USA 113 between davis and woodland	YES	NO	NO	22.98	Female	NotApplicable
CLATUS000002	USA	Coyote	SAMN29845308	SRR20326495	YPi3840	LAT007002		KIZ	Michigan	Gance Creek Elko County Independence Range Elko County NV	YES	NO	NO	19.36	Female	NotApplicable
CLATUS000003	USA	Coyote	SAMN29845309	SRR20326494	YPi3841	LAT007003		KIZ	Michigan	Gance Creek Elko County Independence Range Elko County NV	YES	NO	NO	20.79	Female	NotApplicable
CLATUS000004	USA	Coyote	SAMN29845310	SRR20326493	YPi3842	LAT007004		KIZ	Michigan	Gance Creek Elko County Independence Range Elko County NV	YES	NO	NO	20.56	Male	NotApplicable
CLSP000001	Clumber Spaniel	Breed_Dogs	SAMN15625794	SRR12330398	FAM007119	27422		NHGRI	Michigan		YES	YES	YES	19.13	Female	A1
CLSP000002	Clumber Spaniel	Breed_Dogs	SAMN15625795	SRR12330397	FAM007164	33091		NHGRI	Michigan		YES	YES	YES	19.9	Male	A1
CLSP000003	Clumber Spaniel	Breed_Dogs	SAMN15625796	SRR12330396	FAM007165	33092		NHGRI	Michigan		YES	YES	YES	18.85	Female	A1
CLSP000004	Clumber Spaniel	Breed_Dogs	SAMN20151455	SRR15100266	CSP004A1	FAM005303		Helsinki	Helsinki		YES	YES	YES	17.52	Male	A1
CLSP000005	Clumber Spaniel	Breed_Dogs	SAMN20151456	SRR15100265	CSP005A1	FAM005304		Helsinki	Helsinki		YES	YES	YES	17.55	Female	A1
CLUPAZ000001	Azerbaijan	Wolf	SAMN29845311	SRR20326492	LUP004087	YPi0652		KIZ	Michigan	Azerbaijan	YES	YES	YES	23.5	Male	NotApplicable
CLUPCN000001	China	Wolf	SAMN29845312	SRR20326491	YP9805	LUP000078		KIZ	Michigan	HeilongjiangÊProvince	YES	YES	YES	18.3	Female	NotApplicable
CLUPCN000002	China	Wolf	SAMN29845313	SRR20326490	YP5993	LUP000111		KIZ	Michigan	QinghaiÊProvince	YES	YES	YES	17.21	Female	NotApplicable
CLUPCN000003	China	Wolf	SAMN29845314	SRR20326489	YP5994	LUP000112		KIZ	Michigan	QinghaiÊProvince	YES	YES	YES	17.46	Female	NotApplicable
CLUPCN000004	China	Wolf	SAMN29845315	SRR20326487	ypi1001	LUP000145		KIZ	Michigan	Xinjiang	YES	YES	YES	19.53	Male	NotApplicable
CLUPCN000005	China	Wolf	SAMN29845316	SRR20326486	ypi1002	LUP000146		KIZ	Michigan	Xinjiang	YES	YES	YES	20.81	Male	NotApplicable
CLUPCN000006	China	Wolf	SAMN29845317	SRR20326485	YPi1004	LUP000147		KIZ	Michigan	Xinjiang	YES	YES	YES	20.55	Male	NotApplicable
CLUPCN000007	China	Wolf	SAMN29845318	SRR20326484	YPi1007	LUP000148		KIZ	Michigan	Xinjiang	YES	YES	YES	20.38	Female	NotApplicable
CLUPCN000008	China	Wolf	SAMN29845319	SRR20326483	ypi989	LUP000149		KIZ	Michigan	Xinjiang	NO	NO	NO	19.04	Male	NotApplicable
CLUPCN000009	China	Wolf	SAMN29845320	SRR20326482	ypi990	LUP000150		KIZ	Michigan	Xinjiang	YES	YES	YES	18.96	Female	NotApplicable
CLUPCN000010	China	Wolf	SAMN29845321	SRR20326481	ypi991	LUP000151		KIZ	Michigan	Xinjiang	YES	YES	YES	20.24	Female	NotApplicable
CLUPCN000011	China	Wolf	SAMN29845322	SRR20326480	YPi3018	LUP000167		KIZ	Michigan	SichuanÊprovince	NO	NO	NO	6.96	Female	NotApplicable
CLUPCN000012	China	Wolf	SAMN29845323	SRR20326479	YPi3019	LUP000168		KIZ	Michigan	SichuanÊprovince	NO	NO	NO	9.33	Female	NotApplicable
CLUPEA000001	Eurasia	Wolf	SAMN19522949	SRR14750359	LUP006630	LUP006630	2-ADN596	Rennes	Michigan		YES	YES	YES	20.63	Male	NotApplicable
CLUPEU000002	Europe	Wolf	SAMN19522963	SRR14750375	LUP006628	LUP006628	2-ADN12652	Rennes	Michigan		YES	YES	YES	23.37	Female	NotApplicable
CLUPGR000001	Greece	Wolf	SAMN17023496	SRR13376369	LUP006817	RA106		Oxford	Michigan	Ellasona Kalyvia Village Pieria Prefecture Greecce	YES	YES	YES	18.53	Male	NotApplicable
CLUPGR000002	Greece	Wolf	SAMN17023497	SRR13376368	LUP006818	RA107		Oxford	Michigan	Ardaneio Village Evros Prefecture Greece	YES	YES	YES	18.59	Female	NotApplicable
CLUPGR000003	Greece	Wolf	SAMN17023498	SRR13376367	LUP006819	RA108		Oxford	Michigan	Kryovrysh Village Kozanh Prefecture Greece	YES	YES	YES	17.91	Male	NotApplicable
CLUPGR000004	Greece	Wolf	SAMN17023499	SRR13376366	LUP006820	RA109		Oxford	Michigan	Avgi Village Thessaloniki Prefecture Greece	YES	YES	YES	18.56	Male	NotApplicable
CLUPGR000005	Greece	Wolf	SAMN17023500	SRR13376365	LUP006821	RA110		Oxford	Michigan	Lithia Village Kastoria Prefecture Greece	YES	YES	YES	18.52	Female	NotApplicable
CLUPGR000006	Greece	Wolf	SAMN17023501	SRR13376364	LUP006822	RA111		Oxford	Michigan	Mavranaioi Village Grevena Prefecture Greece	YES	YES	YES	20.75	Female	NotApplicable
CLUPGR000007	Greece	Wolf	SAMN17023502	SRR13376363	LUP006823	RA112		Oxford	Michigan	Pythio Village Pieria Prefecture Greece	YES	YES	YES	18.12	Male	NotApplicable
CLUPGR000008	Greece	Wolf	SAMN17023503	SRR13376361	LUP006824	RA114		Oxford	Michigan	Petritsi Village Serres Prefecture Greece	YES	YES	YES	17.06	Female	NotApplicable
CLUPGR000009	Greece	Wolf	SAMN17023504	SRR13376360	LUP006825	RA115		Oxford	Michigan	Perivoli Village Fthiotida Prefecture Greece	YES	YES	YES	19.5	Female	NotApplicable
CLUPGR000010	Greece	Wolf	SAMN17023505	SRR13376359	LUP006826	RA116		Oxford	Michigan	Moschokampos Village Pieria Prefecture Greece	YES	YES	YES	14.58	Female	NotApplicable
CLUPGR000011	Greece	Wolf	SAMN17023506	SRR13376358	LUP006827	RA117		Oxford	Michigan	Perivoli Village Fthiotida Prefecture Greece	YES	YES	YES	20.35	Male	NotApplicable
CLUPGR000012	Greece	Wolf	SAMN17023507	SRR13376357	LUP006828	RA118		Oxford	Michigan	Grevena Village Grevena Prefecture Greece	YES	YES	YES	17.63	Female	NotApplicable
CLUPIR000001	Iran	Wolf	SAMN29845324	SRR20326478	LUP004086	YPi2994		KIZ	Michigan	Iran	YES	YES	YES	23.12	Male	NotApplicable
CLUPIR000002	Iran	Wolf	SAMN29845325	SRR20326412	LUP004100	YPi3649		KIZ	Michigan	Iran	YES	YES	YES	24.22	Male	NotApplicable
CLUPIR000003	Iran	Wolf	SAMN29845326	SRR20326411	LUP004101	YPi3650		KIZ	Michigan	Iran	YES	YES	YES	26.12	Male	NotApplicable
CLUPIR000004	Iran	Wolf	SAMN29845327	SRR20326410	LUP004102	YPi3651		KIZ	Michigan	Iran	YES	YES	YES	26.18	Female	NotApplicable
CLUPIR000005	Iran	Wolf	SAMN29845328	SRR20326409	LUP004104	YPi3653		KIZ	Michigan	Iran	YES	YES	YES	26.33	Female	NotApplicable
CLUPIR000006	Iran	Wolf	SAMN29845329	SRR20326408	LUP004105	YPi3654		KIZ	Michigan	Iran	YES	YES	YES	25.02	Female	NotApplicable
CLUPIR000007	Iran	Wolf	SAMN29845330	SRR20326407	LUP004106	YPi3655		KIZ	Michigan	Iran	NO	NO	NO	25.08	Male	NotApplicable
CLUPKG000001	Kyrgyzstan	Wolf	SAMN29845331	SRR20326406	LUP008521	YP160822-032		KIZ	Michigan	near Nura	YES	NO	NO	16.49	Female	NotApplicable
CLUPKZ000002	Kazakhstan	Wolf	SAMN29845332	SRR20326405	LUP008522	YP160822-033		KIZ	Michigan	Betpak Dala	YES	YES	YES	21.64	Male	NotApplicable
CLUPPT000001	Portugal	Wolf	SAMN17023514	SRR13376349	LUP006829	RA195		Oxford	Michigan	Portugal	YES	YES	YES	18.11	Female	NotApplicable
CLUPPT000002	Portugal	Wolf	SAMN17023515	SRR13376348	LUP006830	RA196		Oxford	Michigan	Portugal	YES	YES	YES	18.9	Male	NotApplicable
CLUPRU000001	Russia	Wolf	SAMN29845333	SRR20326404	LUP008512	ypi584		KIZ	Michigan	Altai republicKabanucha	YES	YES	YES	19.68	Male	NotApplicable
CLUPRU000002	Russia	Wolf	SAMN29845334	SRR20326403	LUP008513	ypi585		KIZ	Michigan	Altai republicKabanucha	YES	YES	YES	19.17	Male	NotApplicable
CLUPRU000003	Russia	Wolf	SAMN29845335	SRR20326401	LUP008514	ypi596		KIZ	Michigan	Altai republicKabanucha	YES	YES	YES	19.22	Female	NotApplicable
CLUPRU000004	Russia	Wolf	SAMN29845336	SRR20326400	LUP008515	ypi639		KIZ	Michigan	Sakha-Yakutia republic North part	YES	YES	YES	19.36	Female	NotApplicable
CLUPRU000005	Russia	Wolf	SAMN29845337	SRR20326399	LUP008516	YP160822-024		KIZ	Michigan	Tver	YES	YES	YES	18.36	Male	NotApplicable
CLUPRU000006	Russia	Wolf	SAMN29845338	SRR20326398	LUP008517	YP160822-025		KIZ	Michigan	Velikolukskiy	YES	YES	YES	19.05	Female	NotApplicable
CLUPRU000007	Russia	Wolf	SAMN29845339	SRR20326397	LUP008518	YP160822-026		KIZ	Michigan	Velykolukskiy	YES	YES	YES	22.21	Female	NotApplicable
CLUPRU000008	Russia	Wolf	SAMN29845340	SRR20326396	LUP008519	YP160822-027		KIZ	Michigan	Novosokolnicheskiy	YES	YES	YES	20.9	Male	NotApplicable
CLUPRU000009	Russia	Wolf	SAMN29845341	SRR20326395	LUP008558	YPi0621		KIZ	Michigan	Russia	YES	YES	YES	23.24	Male	NotApplicable
CLUPRU000010	Russia	Wolf	SAMN29845342	SRR20326394	LUP008559	YPi3102		KIZ	Michigan	Russia	YES	YES	YES	25.79	Male	NotApplicable
CLUPRU000011	Russia	Wolf	SAMN29845343	SRR20326393	LUP008560	YPi0634		KIZ	Michigan	Russia	YES	YES	YES	21.97	Female	NotApplicable
CLUPRU000012	Russia	Wolf	SAMN29845344	SRR20326392	LUP008561	YPi0638		KIZ	Michigan	Russia	YES	YES	YES	22.11	Male	NotApplicable
CLUPRU000013	Russia	Wolf	SAMN29845345	SRR20326390	LUP008562	YPi0640		KIZ	Michigan	Russia	YES	YES	YES	21.8	Male	NotApplicable
CLUPRU000014	Russia	Wolf	SAMN29845346	SRR20326389	LUP008563	YPi0644		KIZ	Michigan	Russia	YES	YES	YES	22.37	Female	NotApplicable
CLUPRU000018	Russia	Wolf	SAMN29845347	SRR20326388	YP160822-028	LUP008520		KIZ	Michigan	Sochi	NO	NO	NO	16.25	Female	NotApplicable
CLUPRU000019	Russia	Wolf	SAMN29845348	SRR20326387	YP160822-038	LUP008527		KIZ	Michigan	Archangels province	YES	NO	NO	19.69	Male	NotApplicable
CLUPRU000020	Russia	Wolf	SAMN29845349	SRR20326386	YP160822-039	LUP008528		KIZ	Michigan	Archangels province	YES	NO	NO	22.15	Female	NotApplicable
CLUPSE000001	Sweden	Wolf	SAMN17023516	SRR13376347	LUP006645	20115275	CRR032393	Oxford	Michigan	Sweden (Swedish Museum of Natural History)	YES	YES	YES	18.66	Female	NotApplicable
CLUPSE000002	Sweden	Wolf	SAMN17023517	SRR13376346	LUP006646	20115034	CRR032394	Oxford	Michigan	Sweden (Swedish Museum of Natural History)	YES	YES	YES	22.14	Male	NotApplicable
CLUPSE000003	Sweden	Wolf	SAMN17023518	SRR13376345	LUP006647	20115355	CRR032395	Oxford	Michigan	Sweden (Swedish Museum of Natural History)	YES	YES	YES	18.33	Female	NotApplicable
CLUPSE000004	Sweden	Wolf	SAMN17023519	SRR13376344	LUP006648	20115100	CRR032396	Oxford	Michigan	Sweden (Swedish Museum of Natural History)	YES	YES	YES	20.36	Female	NotApplicable
CLUPSE000005	Sweden	Wolf	SAMN17023520	SRR13376343	LUP006649	20115277	CRR032397	Oxford	Michigan	Sweden (Swedish Museum of Natural History)	YES	YES	YES	16.7	Male	NotApplicable
CLUPSE000006	Sweden	Wolf	SAMN17023521	SRR13376342	LUP006650	20115054	CRR032398	Oxford	Michigan	Sweden (Swedish Museum of Natural History)	YES	YES	YES	17.84	Female	NotApplicable
CLUPTJ000001	Tajikistan	Wolf	SAMN29845350	SRR20326385	LUP003505	YPi3124		KIZ	Michigan	Tajikistan	YES	NO	NO	17.81	Female	NotApplicable
CLUPTJ000002	Tajikistan	Wolf	SAMN29845351	SRR20326384	LUP003506	YPi3125		KIZ	Michigan	Tajikistan	YES	NO	NO	23.37	Male	NotApplicable
CLUPTJ000003	Tajikistan	Wolf	SAMN29845352	SRR20326383	LUP003513	YPi3130		KIZ	Michigan	Tajikistan	YES	YES	YES	22.74	Female	NotApplicable
CLUPTJ000004	Tajikistan	Wolf	SAMN29845353	SRR20326382	LUP008523	YP160822-034		KIZ	Michigan	Murgab Atobek conces	YES	YES	NO	21.71	Female	NotApplicable
CLUPTJ000005	Tajikistan	Wolf	SAMN29845354	SRR20326381	LUP008524	YP160822-035		KIZ	Michigan	Murgab Atobek conces	YES	YES	YES	21.85	Male	NotApplicable
CLUPTJ000006	Tajikistan	Wolf	SAMN29845355	SRR20326251	LUP008525	YP160822-036		KIZ	Michigan	Murgab Atobek conces	YES	YES	NO	24.8	Male	NotApplicable
CLUPTJ000007	Tajikistan	Wolf	SAMN29845356	SRR20326250	LUP008526	YP160822-037		KIZ	Michigan	Murgab Atobek conces	YES	NO	NO	17.3	Female	NotApplicable
CNCS000001	Cane Corso	Breed_Dogs	SAMN15625797	SRR12330395	FAM007235	27352		NHGRI	Michigan		YES	YES	YES	21.11	Female	A1
CNCS000002	Cane Corso	Breed_Dogs	SAMN21036265	SRR15734897	CI005	FAM005407		Bern	Bern		YES	YES	YES	18.37	Male	A1
CNCS000003	Cane Corso	Breed_Dogs	SAMN20151428	SRR15100148	CAC035	FAM005276		Helsinki	Helsinki		YES	YES	YES	18.7	Male	A1
CNCS000004	Cane Corso	Breed_Dogs	SAMN19522798	SRR14750410	FAM005933	2-ADN12310		Rennes	Michigan		YES	YES	YES	21.24	Female	A1
CNTI000001	Continental Bulldog	Breed_Dogs	SAMN21036412	SRR15734847	OB001	FAM005433		Bern	Bern		YES	YES	YES	17.32	Female	A1
CNTI000002	Continental Bulldog	Breed_Dogs	SAMN21036413	SRR15734845	OB002	FAM005508		Bern	Bern		YES	YES	YES	19.76	Female	C2
CNTI000003	Continental Bulldog	Breed_Dogs	SAMN21036414	SRR15734844	OB003	FAM005509		Bern	Bern		YES	YES	YES	18.81	Female	C2
CNTI000004	Continental Bulldog	Breed_Dogs	SAMN21036415	SRR15734843	OB007	FAM005510		Bern	Bern		YES	YES	YES	17.69	Male	C2
CNTI000005	Continental Bulldog	Breed_Dogs	SAMN21036416	SRR15734842	OB010	FAM005511		Bern	Bern		YES	YES	YES	18.06	Female	A1
CNTI000006	Continental Bulldog	Breed_Dogs	SAMN21036417	SRR15734841	OB014	FAM005512		Bern	Bern		YES	YES	YES	18.9	Female	A1
COLL000001	Collie	Breed_Dogs	SAMN15625798	SRR12330394	FAM007087	13303		NHGRI	Michigan		YES	YES	YES	20.01	Male	A1
COLL000002	Collie	Breed_Dogs	SAMN15625799	SRR12330393	FAM007129	28861		NHGRI	Michigan	read order fixed	YES	YES	YES	19.2	Female	A1
COLL000003	Collie	Breed_Dogs	SAMN15625800	SRR12330392	FAM007131	29554		NHGRI	Michigan		YES	YES	YES	19.73	Male	A1
COLL000004	Collie	Breed_Dogs	SAMN21036267	SRR15734895	CL003	FAM005408		Bern	Bern		YES	YES	YES	18.78	Male	A1
COLL000005	Collie	Breed_Dogs	SAMN20151453	SRR15100268	CPK085A1	FAM005301		Helsinki	Helsinki		YES	YES	YES	20.76	Male	A1
COLL000006	Collie	Breed_Dogs	SAMN20151454	SRR15100267	CPK094A1	FAM005302		Helsinki	Helsinki		YES	YES	YES	16.72	Female	A1
COLL000007	Collie	Breed_Dogs	SAMN20151440	SRR15100135	CLK076A1	FAM005288		Helsinki	Helsinki		YES	YES	YES	22.28	Male	B1
COLL000008	Collie	Breed_Dogs	SAMN20151441	SRR15100134	CLK139A1	FAM005289		Helsinki	Helsinki		YES	YES	YES	19.16	Male	C1
COLL000009	Collie	Breed_Dogs	SAMN20151442	SRR15100133	CLK140A1	FAM005290		Helsinki	Helsinki		YES	YES	YES	18.89	Male	C1
COLL000010	Collie	Breed_Dogs	SAMN20151443	SRR15100279	CLK141A1	FAM005291		Helsinki	Helsinki		YES	YES	YES	19.7	Male	C1
COLL000011	Collie	Breed_Dogs	SAMN20151444	SRR15100278	CLK200A1	FAM005292		Helsinki	Helsinki		YES	YES	YES	19.67	Female	C1
COLL000012	Collie	Breed_Dogs	SAMN20151445	SRR15100277	CLK223A1	FAM005293		Helsinki	Helsinki		YES	YES	YES	20.26	Male	C1
COLL000013	Collie	Breed_Dogs	SAMN19522799	SRR14750411	FAM006560	2-ADN6761		Rennes	Michigan		YES	YES	YES	28.7	Female	A1
COOK000001	Chinook	Breed_Dogs	SAMN15625801	SRR12330390	FAM007269	33140		NHGRI	Michigan		YES	YES	YES	17.46	Female	A1
COOK000002	Chinook	Breed_Dogs	SAMN15625802	SRR12330389	FAM007270	33141		NHGRI	Michigan		YES	YES	YES	20.21	Female	A1
COOK000003	Chinook	Breed_Dogs	SAMN15625803	SRR12330388	FAM007272	33143		NHGRI	Michigan		YES	YES	YES	19.47	Female	A1
COOK000004	Chinook	Breed_Dogs	SAMN15625804	SRR12330387	FAM007278	33256		NHGRI	Michigan		YES	YES	YES	17.51	Male	A1
COOK000005	Chinook	Breed_Dogs	SAMN15625805	SRR12330386	FAM007341	33257		NHGRI	Uppsala		YES	YES	YES	16.48	Male	A1
COOK000006	Chinook	Breed_Dogs	SAMN15625806	SRR12330385	FAM007342	33317		NHGRI	Uppsala		YES	YES	YES	16.16	Female	A1
COOK000007	Chinook	Breed_Dogs	SAMN15625807	SRR12330384	FAM007343	33360		NHGRI	Uppsala		NO	NO	NO	11.45	Male	NotApplicable
COOK000008	Chinook	Breed_Dogs	SAMN15625808	SRR12330383	FAM007344	33362		NHGRI	Uppsala		NO	NO	NO	8.77	Male	NotApplicable
COOK000009	Chinook	Breed_Dogs	SAMN15625809	SRR12330382	FAM007345	33386		NHGRI	Uppsala		NO	NO	NO	10.19	Female	NotApplicable
COTO000001	Coton de Tulear	Breed_Dogs	SAMN15625810	SRR12330381	FAM007172	33217		NHGRI	Michigan		YES	YES	YES	18.85	Female	B1
COTO000002	Coton de Tulear	Breed_Dogs	SAMN15625811	SRR12330379	FAM007346	33882		NHGRI	Uppsala		NO	NO	NO	16.64	Female	NotApplicable
COTO000003	Coton de Tulear	Breed_Dogs	SAMN21036268	SRR15734894	CO003	FAM005409		Bern	Bern		YES	YES	YES	18.11	Male	A1
COTO000004	Coton de Tulear	Breed_Dogs	SAMN20151434	SRR15100141	CDT451	FAM005282		Helsinki	Helsinki		YES	YES	YES	17.74	Female	B1
CRES000001	Chinese Crested	Breed_Dogs	SAMN21036261	SRR15734669	CC604	FAM005566		Bern	Bern		YES	YES	YES	18.83	Male	A1
CRES000002	Chinese Crested	Breed_Dogs	SAMN21035103	SRR16048865	KHK431A1	FAM005648		Helsinki	Helsinki		YES	YES	YES	18.16	Male	A1
CRSP000001	Croatian Sheepdog	Breed_Dogs	SAMN21035104	SRR16048864	KPK004A1	FAM006741		Helsinki	Helsinki		YES	YES	YES	16.86	Female	A1
CRSP000002	Croatian Sheepdog	Breed_Dogs	SAMN21035105	SRR16048863	KPK005A1	FAM006742		Helsinki	Helsinki		YES	YES	YES	20.14	Male	A1
CRSP000003	Croatian Sheepdog	Breed_Dogs	SAMN21035106	SRR16048862	KPK006A1	FAM006743		Helsinki	Helsinki		YES	YES	YES	17.24	Female	A1
CRSP000004	Croatian Sheepdog	Breed_Dogs	SAMN21035107	SRR16048861	KPK007A1	FAM006744		Helsinki	Helsinki		YES	YES	YES	17.97	Male	A1
CRTR000001	Cretan Tracer	Breed_Dogs	SAMN30371173	SRR21121000	FAM005076	Cf1	CRR033008	Oxford	Michigan		YES	YES	YES	18.15	Male	A1
CRTR000002	Cretan Tracer	Breed_Dogs	SAMN30371174	SRR21120999	FAM005077	Cf2	CRR033009	Oxford	Michigan		YES	YES	YES	18.63	Female	A1
CRTR000003	Cretan Tracer	Breed_Dogs	SAMN17023491	SRR13376337	FAM005078	Cf3	CRR033010	Oxford	Michigan	Kritikos Lagonikos	YES	YES	YES	17.34	Female	A1
CRTR000004	Cretan Tracer	Breed_Dogs	SAMN17023492	SRR13376336	FAM005079	Cf4	CRR033011	Oxford	Michigan	Kritikos Lagonikos	YES	YES	YES	18.28	Male	B1
CRTR000005	Cretan Tracer	Breed_Dogs	SAMN17023493	SRR13376372	FAM005080	Cf5	CRR033012	Oxford	Michigan	Kritikos Lagonikos	YES	YES	YES	19.18	Male	B1
CRTR000006	Cretan Tracer	Breed_Dogs	SAMN17023494	SRR13376371	FAM005081	Cf6	CRR033013	Oxford	Michigan	Kritikos Lagonikos	YES	YES	YES	17.32	Female	A1
CRTR000007	Cretan Tracer	Breed_Dogs	SAMN17023495	SRR13376370	FAM005082	Cf7	CRR033014	Oxford	Michigan	Kritikos Lagonikos	YES	YES	YES	17.5	Female	B1
CRTR000008	Hellenic Hound	Breed_Dogs	SAMN17023508	SRR13376356	FAM005083	Cf8	CRR033015	Oxford	Michigan	Greek tracer	YES	YES	YES	17.77	Male	A1
CRTR000009	Hellenic Hound	Breed_Dogs	SAMN17023509	SRR13376355	FAM005084	Cf9	CRR033016	Oxford	Michigan	Greek tracer	YES	YES	YES	18.92	Female	A1
CRTR000010	Hellenic Hound	Breed_Dogs	SAMN17023510	SRR13376354	FAM005085	Cf10	CRR033017	Oxford	Michigan	Greek tracer	YES	YES	YES	18.59	Male	A1
CRTR000011	Hellenic Hound	Breed_Dogs	SAMN17023511	SRR13376353	FAM005086	Cf11	CRR033018	Oxford	Michigan	Greek tracer	YES	YES	YES	17.12	Female	B1
CRTR000012	Hellenic Hound	Breed_Dogs	SAMN17023512	SRR13376352	FAM005087	Cf12	CRR033019	Oxford	Michigan	Greek tracer	YES	YES	YES	17.31	Female	A1
CSHD000001	Catalan Sheepdog	Breed_Dogs	SAMN21035108	SRR16048860	KAT025A1	FAM005380		Helsinki	Helsinki		YES	YES	YES	17.29	Female	A1
CSHD000002	Catalan Sheepdog	Breed_Dogs	SAMN21035109	SRR16048859	KAT026A1	FAM005381		Helsinki	Helsinki		YES	YES	YES	18.98	Female	A1
CSHD000003	Catalan Sheepdog	Breed_Dogs	SAMN21035110	SRR16048858	KAT036A1	FAM005382		Helsinki	Helsinki		YES	YES	YES	18.31	Male	A1
CSHD000004	Catalan Sheepdog	Breed_Dogs	SAMN19522800	SRR14750412	FAM006544	2-ADN5570		Rennes	Michigan		YES	YES	YES	19.36	Female	A1
CSHD000005	Catalan Sheepdog	Breed_Dogs	SAMN19522801	SRR14750413	FAM006577	2-ADN8320		Rennes	Michigan		YES	YES	YES	19.74	Female	A1
CSKT000001	Cesky Terrier	Breed_Dogs	SAMN15625812	SRR12330378	FAM007337	31121		NHGRI	Uppsala		NO	NO	NO	7.7	Female	NotApplicable
CSKT000002	Cesky Terrier	Breed_Dogs	SAMN15625813	SRR12330377	FAM007248	31125		NHGRI	Michigan		NO	NO	NO	14.09	Male	NotApplicable
CSKT000003	Cesky Terrier	Breed_Dogs	SAMN15625814	SRR12330376	FAM007284	33431		NHGRI	Michigan		YES	YES	YES	20.24	Male	C2
CSKT000004	Cesky Terrier	Breed_Dogs	SAMN15625815	SRR12330375	FAM007338	33431		NHGRI	Uppsala		NO	NO	NO	16.72	Male	NotApplicable
CSKT000005	Cesky Terrier	Breed_Dogs	SAMN15625816	SRR12330374	FAM007286	33463		NHGRI	Michigan		YES	YES	YES	19.23	Female	C2
CSKT000006	Cesky Terrier	Breed_Dogs	SAMN20151435	SRR15100140	CET029	FAM005283		Helsinki	Helsinki		YES	YES	YES	19.67	Male	C2
CSKT000007	Cesky Terrier	Breed_Dogs	SAMN20151436	SRR15100139	CET039	FAM005284		Helsinki	Helsinki		YES	YES	YES	18.72	Female	A1
CSKT000008	Cesky Terrier	Breed_Dogs	SAMN20151437	SRR15100138	CET051	FAM005285		Helsinki	Helsinki		YES	YES	YES	17.67	Female	A1
CTLB000001	Catalburun	Breed_Dogs	SAMN29845572	SRR20326620	FAM004047	ZTD16061337		RIT	Michigan		YES	YES	YES	18.68	Female	C2
CTLB000002	Catalburun	Breed_Dogs	SAMN29845573	SRR20326619	FAM004048	ZTD16061338		RIT	Michigan		YES	YES	YES	19.14	Female	B1
CTLB000003	Catalburun	Breed_Dogs	SAMN29845574	SRR20326618	FAM004049	ZTD16061339		RIT	Michigan		YES	YES	YES	20.21	Female	A1
CZEC000001	Czechoslovakian Wolfdog	Breed_Dogs	SAMN21036513	SRR15734751	TW009	FAM005628		Bern	Bern		YES	YES	YES	18.05	Female	A1
CZEC000002	Czechoslovakian Wolfdog	Breed_Dogs	SAMN21036514	SRR15734750	TW069	FAM005629		Bern	Bern		YES	YES	YES	18.56	Male	A1
CZEC000003	Czechoslovakian Wolfdog	Breed_Dogs	SAMN29949170	SRR20637404	CSV001A1	FAM005306		Helsinki	Helsinki		YES	YES	YES	20.69	Male	A1
CZEC000004	Czechoslovakian Wolfdog	Breed_Dogs	SAMN29949171	SRR20637403	CSV007A1	FAM005307		Helsinki	Helsinki		YES	YES	YES	19.6	Female	C1
DACH000001	Dachshund	Breed_Dogs	SAMN15625817	SRR12330373	FAM007056	8257		NHGRI	Michigan		YES	YES	YES	18.56	Female	A1
DACH000002	Dachshund	Breed_Dogs	SAMN15625818	SRR12330372	FAM007057	8272		NHGRI	Michigan		YES	YES	YES	21.29	Female	C1
DACH000003	Dachshund	Breed_Dogs	SAMN21035111	SRR16048856	KKM179A1	FAM005652		Helsinki	Helsinki		YES	YES	YES	18.31	Female	B1
DACH000004	Dachshund	Breed_Dogs	SAMN21035112	SRR16048855	KKM180A1	FAM005653		Helsinki	Helsinki		YES	YES	YES	18.05	Male	B1
DACH000005	Dachshund	Breed_Dogs	SAMN21035113	SRR16048854	KKM200A1	FAM005654		Helsinki	Helsinki		YES	YES	YES	18.28	Male	A1
DACH000006	Dachshund	Breed_Dogs	SAMN21035114	SRR16048853	KMK018A1	FAM005657		Helsinki	Helsinki		YES	YES	YES	19.74	Female	B1
DACH000007	Dachshund	Breed_Dogs	SAMN21035115	SRR16048852	KML078A1	FAM005658		Helsinki	Helsinki		YES	YES	YES	18.6	Female	A1
DACH000008	Dachshund	Breed_Dogs	SAMN21035116	SRR16048851	PKM018A2	FAM005741		Helsinki	Helsinki		YES	YES	YES	17.55	Female	A1
DACH000009	Dachshund	Breed_Dogs	SAMN21035117	SRR16048850	PKM019A1	FAM005742		Helsinki	Helsinki		YES	YES	YES	19.74	Male	A1
DACH000010	Dachshund	Breed_Dogs	SAMN21035118	SRR16048849	PKM050A1	FAM005743		Helsinki	Helsinki		YES	YES	YES	18.76	Female	A1
DACH000011	Dachshund	Breed_Dogs	SAMN21035119	SRR16048847	PKM058A1	FAM006814		Helsinki	Helsinki		YES	YES	YES	16.8	Female	B1
DACH000012	Dachshund	Breed_Dogs	SAMN19522802	SRR14750415	FAM005945	2-ADN12759		Rennes	Michigan		YES	YES	YES	17.95	Male	A1
DACH000013	Dachshund	Breed_Dogs	SAMN19522803	SRR14750416	FAM006603	3-ADN9741-1		Rennes	Michigan		YES	YES	YES	18.08	Male	B1
DACH000014	Dachshund	Breed_Dogs	SAMN19522804	SRR14750417	FAM005920	2-ADN11544		Rennes	Michigan		YES	YES	YES	20.91	Male	B1
DACH000015	Dachshund	Breed_Dogs	SAMN19522805	SRR14750418	FAM005927	2-ADN12059		Rennes	Michigan		YES	YES	YES	19.71	Female	A1
DACH000016	Dachshund	Breed_Dogs	SAMN19522806	SRR14750419	FAM005935	2-ADN12467		Rennes	Michigan		YES	YES	YES	18.01	Female	B1
DACH000017	Dachshund	Breed_Dogs	SAMN19522807	SRR14750420	FAM005983	3-ADN22484		Rennes	Michigan		YES	YES	YES	19	Male	A1
DALM000001	Dalmatian	Breed_Dogs	SAMN15625819	SRR12330371	FAM007052	7305		NHGRI	Michigan		YES	YES	YES	23.06	Male	A1
DALM000002	Dalmatian	Breed_Dogs	SAMN15625820	SRR12330370	FAM007086	13301		NHGRI	Michigan		YES	YES	YES	18.39	Female	A1
DALM000003	Dalmatian	Breed_Dogs	SAMN21036274	SRR15734888	DA162	FAM005573		Bern	Bern		YES	YES	YES	18.44	Male	A1
DALM000004	Dalmatian	Breed_Dogs	SAMN20151462	SRR15100259	DAL133A1	FAM005310		Helsinki	Helsinki		YES	YES	YES	17.98	Female	A1
DALM000005	Dalmatian	Breed_Dogs	SAMN19522808	SRR14750541	FAM005955	2-ADN13408		Rennes	Michigan		YES	YES	YES	22.02	Male	A1
DAND000001	Dandie Dinmont Terrier	Breed_Dogs	SAMN15625821	SRR12330368	FAM007191	7731		NHGRI	Michigan		YES	YES	YES	21.35	Male	B1
DAND000002	Dandie Dinmont Terrier	Breed_Dogs	SAMN15625822	SRR12330367	FAM007192	7732		NHGRI	Michigan		YES	YES	YES	18.62	Female	B1
DAND000003	Dandie Dinmont Terrier	Breed_Dogs	SAMN15625823	SRR12330366	FAM007193	7733		NHGRI	Michigan		YES	YES	YES	20.38	Female	B1
DAND000004	Dandie Dinmont Terrier	Breed_Dogs	SAMN20151467	SRR15100253	DDT361A1	FAM005315		Helsinki	Helsinki		YES	YES	YES	20.24	Male	A1
DAND000005	Dandie Dinmont Terrier	Breed_Dogs	SAMN20151468	SRR15100252	DDT363A1	FAM005316		Helsinki	Helsinki		YES	YES	YES	21.83	Male	B1
DAND000006	Dandie Dinmont Terrier	Breed_Dogs	SAMN20151469	SRR15100251	DDT408A1	FAM005317		Helsinki	Helsinki		YES	YES	YES	19.26	Female	B1
DARG000001	Dogo Argentino	Breed_Dogs	SAMN15625824	SRR12330365	FAM007347	22900		NHGRI	Uppsala		YES	YES	YES	15.38	Male	A1
DARG000002	Dogo Argentino	Breed_Dogs	SAMN15625825	SRR12330364	FAM007348	33067		NHGRI	Uppsala		YES	YES	YES	14.43	Female	A1
DARG000003	Dogo Argentino	Breed_Dogs	SAMN20151470	SRR15100250	DOG031A1	FAM005318		Helsinki	Helsinki		YES	YES	YES	17.65	Female	A1
DARG000004	Dogo Argentino	Breed_Dogs	SAMN20151471	SRR15100249	DOG035A1	FAM005319		Helsinki	Helsinki		YES	YES	YES	17.77	Female	A1
DARG000005	Dogo Argentino	Breed_Dogs	SAMN20151472	SRR15100248	DOG044A1	FAM005320		Helsinki	Helsinki		YES	YES	YES	17.28	Female	A1
DDBX000001	Dogue de Bordeaux	Breed_Dogs	SAMN15625826	SRR12330363	FAM007349	25487		NHGRI	Uppsala		YES	YES	YES	16.26	Male	A1
DDBX000002	Dogue de Bordeaux	Breed_Dogs	SAMN19522809	SRR14750542	FAM005921	2-ADN11545		Rennes	Michigan		YES	YES	YES	20.35	Male	A1
DDBX000003	Dogue de Bordeaux	Breed_Dogs	SAMN19522810	SRR14750543	FAM005929	2-ADN12071		Rennes	Michigan		YES	YES	YES	17.73	Female	A1
DDBX000004	Dogue de Bordeaux	Breed_Dogs	SAMN19522811	SRR14750544	FAM005930	2-ADN12081		Rennes	Michigan		YES	YES	YES	16.95	Male	A1
DDBX000005	Dogue de Bordeaux	Breed_Dogs	SAMN19522812	SRR14750424	FAM006571	2-ADN7996		Rennes	Michigan		YES	YES	YES	20.02	Female	A1
DEER000001	Scottish Deerhound	Breed_Dogs	SAMN21036456	SRR15734796	SD001	FAM005450		Bern	Bern		YES	YES	YES	17.21	Female	A1
DEER000002	Scottish Deerhound	Breed_Dogs	SAMN21036457	SRR15734795	SD008	FAM005451		Bern	Bern		YES	YES	YES	20.48	Male	A1
DEER000003	Scottish Deerhound	Breed_Dogs	SAMN21035120	SRR16048819	SHK021A1	FAM005811		Helsinki	Helsinki		YES	YES	YES	22.05	Male	A1
DEER000004	Scottish Deerhound	Breed_Dogs	SAMN19522813	SRR14750425	FAM006618	2-ADNPR4349		Rennes	Michigan		NO	NO	NO	22.16	Female	NotApplicable
DOBP000001	Doberman Pinscher	Breed_Dogs	SAMN21036281	SRR15734885	DO349	FAM005574		Bern	Bern		YES	YES	YES	19.49	Female	A1
DOBP000002	Doberman Pinscher	Breed_Dogs	SAMN21036276	SRR16289014	DO110	FAM004588		Bern	Uppsala		YES	YES	YES	17.77	Male	C1
DOBP000003	Doberman Pinscher	Breed_Dogs	SAMN21036277	SRR16289013	DO125	FAM004589		Bern	Uppsala		YES	YES	YES	18.05	Female	C1
DOBP000004	Doberman Pinscher	Breed_Dogs	SAMN21036278	SRR16289011	DO126	FAM004590		Bern	Uppsala		YES	YES	YES	17.56	Female	C1
DOBP000005	Doberman Pinscher	Breed_Dogs	SAMN21036279	SRR16289010	DO127	FAM004591		Bern	Uppsala		YES	YES	YES	16.27	Female	B1
DOBP000006	Doberman Pinscher	Breed_Dogs	SAMN21036280	SRR16289009	DO180	FAM004592		Bern	Uppsala		YES	YES	YES	16.87	Male	B1
DOBP000007	Doberman Pinscher	Breed_Dogs	SAMN21036282	SRR16289008	DO640	FAM004593		Bern	Uppsala		YES	YES	YES	17.85	Male	B1
DREV000001	Drever	Breed_Dogs	SAMN20151474	SRR15100245	DRE011A1	FAM005322		Helsinki	Helsinki		YES	YES	YES	18.94	Female	A1
DREV000002	Drever	Breed_Dogs	SAMN20151475	SRR15100244	DRE026A1	FAM005323		Helsinki	Helsinki		YES	YES	YES	20.32	Male	A1
DREV000003	Drever	Breed_Dogs	SAMN20151476	SRR15100243	DRE032A1	FAM005324		Helsinki	Helsinki		YES	YES	YES	17.68	Male	A1
DREV000004	Drever	Breed_Dogs	SAMN20151477	SRR15100242	DRE046A1	FAM005325		Helsinki	Helsinki		YES	YES	YES	18.84	Female	A1
DREV000005	Drever	Breed_Dogs	SAMN20151478	SRR15100241	DRE048A1	FAM005326		Helsinki	Helsinki		YES	YES	YES	17.25	Female	A1
DREV000006	Drever	Breed_Dogs	SAMN20151479	SRR15100240	DRE053A1	FAM005327		Helsinki	Helsinki		YES	YES	YES	19.01	Male	A1
DSFD000001	Danish-Swedish Farmdog	Breed_Dogs	SAMN21035121	SRR16048817	TRP038A1	FAM005838		Helsinki	Helsinki		YES	YES	YES	21.98	Female	B1
DSFD000002	Danish-Swedish Farmdog	Breed_Dogs	SAMN21035122	SRR16048816	TRP044A1	FAM005839		Helsinki	Helsinki		YES	YES	YES	19.95	Female	A1
DSFD000003	Danish-Swedish Farmdog	Breed_Dogs	SAMN21035123	SRR16048815	TRP085A1	FAM005840		Helsinki	Helsinki		YES	YES	YES	17.69	Female	A1
DSFD000004	Danish-Swedish Farmdog	Breed_Dogs	SAMN21035124	SRR16048814	TRP087A1	FAM005841		Helsinki	Helsinki		YES	YES	YES	19.35	Male	B1
DSFD000005	Danish-Swedish Farmdog	Breed_Dogs	SAMN21035125	SRR16048813	TRP108A1	FAM005842		Helsinki	Helsinki		YES	YES	YES	18.65	Male	B1
DSFD000006	Danish-Swedish Farmdog	Breed_Dogs	SAMN21035126	SRR16048812	TRP131A1	FAM005843		Helsinki	Helsinki		YES	YES	YES	18.46	Male	B1
DSHP000001	Unknown	Breed_Dogs	SAMN21036332	SRR15734727	HO003	FAM005417		Bern	Bern		YES	NO	NO	17.77	Female	NotApplicable
DSHP000002	Dutch Shepherd	Breed_Dogs	SAMN21036333	SRR15734726	HO007	FAM005418		Bern	Bern		YES	YES	YES	13.02	Female	B1
DSHP000003	Dutch Shepherd	Breed_Dogs	SAMN21035127	SRR16048811	HPK035A1	FAM005354		Helsinki	Helsinki	Dutch Shepherd Dog rough	YES	YES	YES	20.47	Female	B1
DSHP000004	Dutch Shepherd	Breed_Dogs	SAMN21035128	SRR16048810	HPK018A1	FAM005353		Helsinki	Helsinki	Dutch Shepherd Dog wirehaired	YES	YES	YES	20.84	Male	B1
DSHP000005	Dutch Shepherd	Breed_Dogs	SAMN19522814	SRR14750426	FAM005960	2-ADN13687		Rennes	Michigan		YES	YES	YES	19.89	Female	A1
DSHP000006	Dutch Shepherd	Breed_Dogs	SAMN19522815	SRR14750427	FAM006546	2-ADN5709		Rennes	Michigan		YES	YES	YES	19.97	Male	C1
DUPD000001	Dutch Partridge Dog	Breed_Dogs	SAMN20151473	SRR15100246	DPK001A1	FAM005321		Helsinki	Helsinki		YES	YES	YES	18.72	Male	A1
ECKR000001	English Cocker Spaniel	Breed_Dogs	SAMN15625827	SRR12330362	FAM007073	12021		NHGRI	Michigan		YES	YES	YES	18.09	Female	C2
ECKR000002	English Cocker Spaniel	Breed_Dogs	SAMN15625828	SRR12330361	FAM007088	13589		NHGRI	Michigan		YES	YES	YES	20.06	Female	A1
ECKR000003	English Cocker Spaniel	Breed_Dogs	SAMN15625829	SRR12330360	FAM007127	28381		NHGRI	Michigan		YES	YES	YES	18.47	Female	A1
EEUS000001	East-European shepherd	Breed_Dogs	SAMN21035129	SRR16048809	VEO004A1	FAM006798		Helsinki	Helsinki		YES	YES	YES	17.17	Female	A1
EEUS000002	East-European shepherd	Breed_Dogs	SAMN21035130	SRR16048808	VEO005A1	FAM006799		Helsinki	Helsinki		YES	YES	YES	17.97	Female	B1
EEUS000003	East-European shepherd	Breed_Dogs	SAMN21035131	SRR16048806	VEO006A1	FAM006800		Helsinki	Helsinki		YES	YES	YES	19.13	Male	A1
EFXH000002	English Foxhound	Breed_Dogs	SAMN15625831	SRR12330357	FAM007033	947		NHGRI	Michigan		YES	YES	YES	19.18	Male	B1
EFXH000003	English Foxhound	Breed_Dogs	SAMN15625832	SRR12330356	FAM007230	27119		NHGRI	Michigan		YES	YES	YES	16.75	Male	B1
EGTT000001	English Toy Spaniel	Breed_Dogs	SAMN29845202	SRR20326256	FAM007438	26566		Cornell	Uppsala		YES	YES	YES	18.69	Male	B1
EGTT000002	English Toy Spaniel	Breed_Dogs	SAMN29845203	SRR20326598	FAM007439	13592		Cornell	Uppsala		YES	YES	YES	18.71	Female	A1
EGTT000003	English Toy Spaniel	Breed_Dogs	SAMN29845204	SRR20326587	FAM007440	9314		Cornell	Uppsala		YES	YES	YES	21.73	Male	C2
EGTT000004	English Shepherd	Breed_Dogs	SAMN29845205	SRR20326574	FAM007441	12911		Cornell	Uppsala		YES	YES	YES	18.13	Male	A1
EGTT000005	English Shepherd	Breed_Dogs	SAMN29845206	SRR20326499	FAM007442	16367		Cornell	Uppsala		YES	YES	YES	18.23	Female	B2
EGTT000006	English Shepherd	Breed_Dogs	SAMN29845207	SRR20326488	FAM007443	18183		Cornell	Uppsala		YES	YES	YES	19.93	Female	B1
EGTT000007	English Toy Terrier	Breed_Dogs	SAMN21035132	SRR16048805	EKT066A1	FAM006690		Helsinki	Helsinki		YES	YES	YES	20.03	Female	A1
EGTT000008	English Toy Terrier	Breed_Dogs	SAMN21035133	SRR16048804	EKT071A1	FAM006691		Helsinki	Helsinki		YES	YES	YES	18.57	Female	A1
EGTT000009	English Toy Terrier	Breed_Dogs	SAMN21035134	SRR16048803	EKT075A1	FAM006692		Helsinki	Helsinki		YES	YES	YES	17.37	Female	A1
EGTT000010	English Toy Terrier	Breed_Dogs	SAMN21035135	SRR16048802	EKT078A1	FAM006693		Helsinki	Helsinki		YES	YES	YES	21.93	Male	A1
EGTT000011	English Toy Terrier	Breed_Dogs	SAMN21035136	SRR16048801	EKT081A1	FAM006694		Helsinki	Helsinki		YES	YES	YES	17.14	Male	A1
EGTT000012	English Toy Terrier	Breed_Dogs	SAMN21035137	SRR16048800	EKT091A1	FAM006695		Helsinki	Helsinki		YES	YES	YES	21.48	Male	A1
EGTT000013	English Toy Terrier	Breed_Dogs	SAMN21035138	SRR16048799	EKT095A1	FAM006696		Helsinki	Helsinki		YES	YES	YES	16.89	Female	A1
EGTT000014	English Toy Terrier	Breed_Dogs	SAMN21035139	SRR16048798	EKT096A1	FAM006697		Helsinki	Helsinki		YES	YES	YES	19.9	Male	A1
EGTT000015	English Toy Terrier	Breed_Dogs	SAMN21035140	SRR16048796	EKT097A1	FAM006698		Helsinki	Helsinki		YES	YES	YES	17.56	Male	B1
EGTT000016	English Toy Terrier	Breed_Dogs	SAMN21035141	SRR16048736	EKT102A1	FAM006699		Helsinki	Helsinki		YES	YES	YES	20.49	Male	A1
ELOD000001	Elo	Breed_Dogs	SAMN21036290	SRR15734877	EL051	FAM005581		Bern	Bern		YES	YES	YES	22.04	Male	A2
ELOD000002	Elo	Breed_Dogs	SAMN21036291	SRR15734875	EL170	FAM005582		Bern	Bern		YES	YES	YES	18	Male	A2
ELOD000003	Elo	Breed_Dogs	SAMN21036292	SRR15734874	EL210	FAM005583		Bern	Bern		YES	YES	YES	18.62	Female	A1
ELOD000004	Elo	Breed_Dogs	SAMN21036293	SRR15734825	EL381	FAM005584		Bern	Bern		YES	YES	YES	18.11	Female	A1
ELOD000005	Elo	Breed_Dogs	SAMN21036294	SRR15734824	EL661	FAM005635		Bern	Bern		YES	YES	YES	18	Female	A2
ENTB000001	Entlebucher Mountain Dog	Breed_Dogs	SAMN15625833	SRR12330355	FAM007079	12841		NHGRI	Michigan		YES	YES	YES	20.78	Female	A1
ENTB000002	Entlebucher Mountain Dog	Breed_Dogs	SAMN15625834	SRR12330354	FAM007080	12842		NHGRI	Michigan		YES	YES	YES	19.57	Male	A1
ENTB000003	Entlebucher Mountain Dog	Breed_Dogs	SAMN15625835	SRR12330353	FAM007350	12859		NHGRI	Uppsala		YES	YES	YES	16.07	Female	A1
ENTB000004	Entlebucher Mountain Dog	Breed_Dogs	SAMN21036298	SRR16289004	EN755	FAM004673		Bern	Uppsala		YES	YES	YES	27.77	Female	A1
ENTB000005	Entlebucher Mountain Dog	Breed_Dogs	SAMN21036299	SRR16289003	EN756	FAM004674		Bern	Uppsala		YES	YES	YES	20.11	Female	A1
ENTB000006	Entlebucher Mountain Dog	Breed_Dogs	SAMN21036300	SRR16289002	EN771	FAM004675		Bern	Uppsala		YES	YES	YES	17.78	Male	A1
ENTB000007	Entlebucher Mountain Dog	Breed_Dogs	SAMN21036295	SRR16289007	EN1269	FAM004676		Bern	Uppsala		YES	YES	YES	17.78	Female	A1
ENTB000008	Entlebucher Mountain Dog	Breed_Dogs	SAMN21036296	SRR16289006	EN1371	FAM004677		Bern	Uppsala		YES	YES	YES	18.71	Male	A1
ENTB000009	Entlebucher Mountain Dog	Breed_Dogs	SAMN21036297	SRR16289005	EN1388	FAM004678		Bern	Uppsala		YES	YES	YES	18.91	Male	A1
EPNT000001	English Pointer	Breed_Dogs	SAMN15626070	SRR12330094	FAM007386	9031		NHGRI	Uppsala		YES	YES	YES	17.51	Male	A1
EPNT000002	English Pointer	Breed_Dogs	SAMN15625836	SRR12330352	FAM007097	15390		NHGRI	Michigan		YES	YES	YES	17.97	Male	B1
EPNT000003	English Pointer	Breed_Dogs	SAMN15625837	SRR12330351	FAM007098	15391		NHGRI	Michigan		YES	YES	YES	20.1	Female	A1
EPNT000004	English Pointer	Breed_Dogs	SAMN15626071	SRR12330092	FAM007387	20568		NHGRI	Uppsala		YES	YES	YES	22.63	Female	A1
EPNT000005	English Pointer	Breed_Dogs	SAMN15626072	SRR12330091	FAM007388	24730		NHGRI	Uppsala		YES	YES	YES	17.09	Male	B1
EPNT000006	English Pointer	Breed_Dogs	SAMN15625838	SRR12330350	FAM007118	27378		NHGRI	Michigan		YES	YES	YES	18.62	Female	A1
EPNT000007	English Pointer	Breed_Dogs	SAMN21035142	SRR16048651	POI028A1	FAM005756		Helsinki	Helsinki		YES	YES	YES	21.33	Male	B1
EPNT000008	English Pointer	Breed_Dogs	SAMN21035143	SRR16048650	POI030A1	FAM005757		Helsinki	Helsinki		YES	YES	YES	17.53	Female	B1
EPNT000009	Unknown	Breed_Dogs	SAMN21035144	SRR16048649	POI031A1	FAM005758		Helsinki	Helsinki		YES	NO	NO	18.37	Female	NotApplicable
ESET000001	English Setter	Breed_Dogs	SAMN15625839	SRR12330349	FAM007096	15386		NHGRI	Michigan		YES	YES	YES	17.68	Female	A1
ESET000002	English Setter	Breed_Dogs	SAMN15625840	SRR12330348	FAM007114	26982		NHGRI	Michigan		YES	YES	YES	18.65	Female	A1
ESET000004	English Setter	Breed_Dogs	SAMN21036302	SRR15734822	ET001	FAM005412		Bern	Bern		YES	YES	YES	20.63	Male	A1
ESMD000001	Estrela Mountain Dog	Breed_Dogs	SAMN20151482	SRR15100237	EST014A1	FAM005330		Helsinki	Helsinki		YES	YES	YES	19.25	Male	B1
ESMD000002	Estrela Mountain Dog	Breed_Dogs	SAMN20151483	SRR15100235	EST017A1	FAM005331		Helsinki	Helsinki		YES	YES	YES	20.59	Male	D2
ESMD000003	Estrela Mountain Dog	Breed_Dogs	SAMN20151484	SRR15100234	EST030A1	FAM005332		Helsinki	Helsinki		YES	YES	YES	23.26	Female	D2
ESMD000004	Estrela Mountain Dog	Breed_Dogs	SAMN20151485	SRR15100233	EST039A1	FAM005333		Helsinki	Helsinki		YES	YES	YES	20.5	Female	D2
ESMD000005	Estrela Mountain Dog	Breed_Dogs	SAMN20151486	SRR15100232	EST047A1	FAM005334		Helsinki	Helsinki		YES	YES	YES	17.19	Female	A1
ESMD000006	Estrela Mountain Dog	Breed_Dogs	SAMN20151487	SRR15100231	EST051A1	FAM005335		Helsinki	Helsinki		YES	YES	YES	18.92	Male	B1
ESSP000001	English Springer Spaniel	Breed_Dogs	SAMN15625842	SRR12330345	FAM007045	4238		NHGRI	Michigan		YES	YES	YES	17.43	Female	A1
ESSP000002	English Springer Spaniel	Breed_Dogs	SAMN15625843	SRR12330344	FAM007046	4239		NHGRI	Michigan		YES	YES	YES	23.34	Female	B1
ESSP000003	English Springer Spaniel	Breed_Dogs	SAMN21036301	SRR15734823	EP003	FAM005411		Bern	Bern		YES	YES	YES	17.85	Male	A1
ESTH000001	Estonian Hound	Breed_Dogs	SAMN21035145	SRR16048648	EAK001A1	FAM006687		Helsinki	Helsinki		YES	YES	YES	18.07	Male	A1
ESTH000002	Estonian Hound	Breed_Dogs	SAMN21035146	SRR16048647	EAK003A1	FAM006688		Helsinki	Helsinki		YES	YES	YES	16.9	Female	A1
ESTH000003	Estonian Hound	Breed_Dogs	SAMN21035147	SRR16048646	EAK002A1	FAM006689		Helsinki	Helsinki		YES	YES	YES	18.92	Female	A1
EURA000001	Eurasier	Breed_Dogs	SAMN15625844	SRR12330343	FAM007351	22815		NHGRI	Uppsala		YES	YES	YES	19.33	Female	A1
EURA000002	Eurasier	Breed_Dogs	SAMN21036303	SRR15734821	EU018	FAM005490		Bern	Bern		YES	YES	YES	17.38	Female	A1
EURA000003	Eurasier	Breed_Dogs	SAMN21036304	SRR15734820	EU030	FAM005491		Bern	Bern		YES	YES	YES	20.18	Female	A1
EURA000004	Eurasier	Breed_Dogs	SAMN20151488	SRR15100230	EUR026A1	FAM005336		Helsinki	Helsinki		YES	YES	YES	18.32	Female	A1
FBUL000001	French Bulldog	Breed_Dogs	SAMN15625845	SRR12330342	FAM007090	14473		NHGRI	Michigan		YES	YES	YES	18.58	Female	A1
FBUL000002	French Bulldog	Breed_Dogs	SAMN15625846	SRR12330341	FAM007091	14477		NHGRI	Michigan		YES	YES	YES	22.38	Male	B1
FBUL000003	French Bulldog	Breed_Dogs	SAMN15625847	SRR12330340	FAM007099	16072		NHGRI	Michigan		YES	YES	YES	17.61	Male	A1
FBUL000004	French Bulldog	Breed_Dogs	SAMN21036305	SRR15734819	FB023	FAM005492		Bern	Bern		YES	YES	YES	18.4	Female	A1
FBUL000005	French Bulldog	Breed_Dogs	SAMN21035148	SRR16048645	RBD190A1	FAM005786		Helsinki	Helsinki		YES	YES	YES	17.38	Female	A1
FBUL000006	French Bulldog	Breed_Dogs	SAMN19522816	SRR14750428	FAM006623	3-ADNPR4634		Rennes	Michigan		YES	YES	YES	18.27	Male	A1
FIEL000001	Field Spaniel	Breed_Dogs	SAMN15625848	SRR12330339	FAM007117	27364		NHGRI	Michigan		YES	YES	YES	19.91	Male	A1
FIEL000002	Field Spaniel	Breed_Dogs	SAMN15625849	SRR12330338	FAM007125	28377		NHGRI	Michigan		YES	YES	YES	18.14	Female	C2
FIEL000003	Field Spaniel	Breed_Dogs	SAMN15625850	SRR12330337	FAM007126	28378		NHGRI	Michigan		YES	YES	YES	22.13	Male	C2
FIEL000004	Field Spaniel	Breed_Dogs	SAMN20151490	SRR15100228	FIS018A1	FAM005338		Helsinki	Helsinki		YES	YES	YES	18.85	Female	A1
FIEL000005	Field Spaniel	Breed_Dogs	SAMN20151491	SRR15100227	FIS029A1	FAM005339		Helsinki	Helsinki		YES	YES	YES	18.75	Male	C2
FINH000001	Finnish Hound	Breed_Dogs	SAMN21035149	SRR16048644	SAK326A1	FAM005789		Helsinki	Helsinki		YES	YES	YES	20.17	Female	B1
FINH000002	Finnish Hound	Breed_Dogs	SAMN21035150	SRR16048643	SAK378A1	FAM005790		Helsinki	Helsinki		YES	YES	YES	20.55	Male	A1
FINH000003	Finnish Hound	Breed_Dogs	SAMN21035151	SRR16048641	SAK398A1	FAM005791		Helsinki	Helsinki		YES	YES	YES	20.57	Male	C2
FINH000004	Finnish Hound	Breed_Dogs	SAMN21035152	SRR16048640	SAK492A1	FAM005792		Helsinki	Helsinki		YES	YES	YES	19.67	Male	A1
FINH000005	Finnish Hound	Breed_Dogs	SAMN21035153	SRR16048639	SAK508A1	FAM005793		Helsinki	Helsinki		YES	YES	YES	17.54	Female	B1
FINH000006	Finnish Hound	Breed_Dogs	SAMN21035154	SRR16048638	SAK539A1	FAM005794		Helsinki	Helsinki		YES	YES	YES	19.36	Female	A1
FINS000001	Finnish Spitz	Breed_Dogs	SAMN15625851	SRR12330335	FAM007053	7309		NHGRI	Michigan		YES	YES	YES	19.46	Female	B1
FINS000002	Finnish Spitz	Breed_Dogs	SAMN21035155	SRR16048637	SPK444A1	FAM005820		Helsinki	Helsinki		YES	YES	YES	20.1	Male	B1
FINS000003	Finnish Spitz	Breed_Dogs	SAMN21035156	SRR16048636	SPK472A1	FAM005821		Helsinki	Helsinki		YES	YES	YES	19.23	Male	B1
FINS000004	Finnish Spitz	Breed_Dogs	SAMN21035157	SRR16048635	SPK547A1	FAM005822		Helsinki	Helsinki		YES	YES	YES	19.58	Female	A1
FINS000005	Finnish Spitz	Breed_Dogs	SAMN21035158	SRR16048634	SPK668A1	FAM005823		Helsinki	Helsinki		YES	YES	YES	18.58	Male	D1
FINS000006	Finnish Spitz	Breed_Dogs	SAMN21035159	SRR16048633	SPK814A1	FAM005824		Helsinki	Helsinki		YES	YES	YES	18.53	Female	B1
FLCD000001	Bouvier des Flandres	Breed_Dogs	SAMN20151395	SRR15100184	BOU044	FAM005243		Helsinki	Helsinki		YES	YES	YES	20.59	Female	A1
FLCD000002	Bouvier des Flandres	Breed_Dogs	SAMN20151396	SRR15100183	BOU066	FAM005244		Helsinki	Helsinki		YES	YES	YES	22.64	Male	C1
FLCD000003	Bouvier des Flandres	Breed_Dogs	SAMN19522817	SRR14750429	FAM005937	2-ADN12493		Rennes	Michigan		YES	YES	YES	18.22	Male	C1
FLCD000004	Bouvier des Flandres	Breed_Dogs	SAMN19522818	SRR14750430	FAM005948	2-ADN12811		Rennes	Michigan		YES	YES	YES	17.07	Female	B1
FLCD000005	Bouvier des Flandres	Breed_Dogs	SAMN19522819	SRR14750431	FAM005985	2-ADN22619		Rennes	Michigan		YES	YES	YES	19.3	Male	C1
FLCD000006	Bouvier des Flandres	Breed_Dogs	SAMN19522820	SRR14750432	FAM005992	2-ADN2446		Rennes	Michigan		YES	YES	YES	17.78	Female	B1
FLCD000007	Bouvier des Flandres	Breed_Dogs	SAMN19522821	SRR14750433	FAM006547	2-ADN6006		Rennes	Michigan		YES	YES	YES	25.5	Male	C1
FLCD000008	Bouvier des Flandres	Breed_Dogs	SAMN19522822	SRR14750435	FAM006608	2-ADNPR3583		Rennes	Michigan		YES	YES	YES	17.75	Male	C1
FLCR000001	Flat-Coated Retriever	Breed_Dogs	SAMN15625852	SRR12330334	FAM007138	30377		NHGRI	Michigan		YES	YES	YES	18	Female	A1
FLCR000002	Flat-Coated Retriever	Breed_Dogs	SAMN15625853	SRR12330333	FAM007144	30651		NHGRI	Michigan		YES	YES	YES	21.2	Female	A1
FLCR000003	Flat-Coated Retriever	Breed_Dogs	SAMN15625854	SRR12330332	FAM007153	31166		NHGRI	Michigan		YES	YES	YES	17.74	Female	A1
FOMD000001	Formosan Mountain Dog	Breed_Dogs	SAMN29845208	SRR20326477	FAM009502	4323		Cornell	Uppsala		YES	YES	YES	19.51	Male	A1
FOMD000002	Formosan Mountain Dog	Breed_Dogs	SAMN29845209	SRR20326402	FAM009503	4322		Cornell	Uppsala		YES	YES	YES	19.07	Male	A2
FOMD000003	Formosan Mountain Dog	Breed_Dogs	SAMN29845210	SRR20326391	FAM009504	4321		Cornell	Uppsala		YES	YES	YES	19.96	Female	A2
FRSP000001	French Spaniel	Breed_Dogs	SAMN19522823	SRR14750436	FAM005988	4-ADN23249		Rennes	Michigan		YES	YES	YES	17.29	Female	A1
FRSP000002	French Spaniel	Breed_Dogs	SAMN19522824	SRR14750437	FAM006516	2-ADN3993		Rennes	Michigan		YES	YES	YES	17.6	Male	A1
FRSP000003	French Spaniel	Breed_Dogs	SAMN19522825	SRR14750438	FAM006582	2-ADN8618		Rennes	Michigan		YES	YES	YES	27.96	Male	A1
FRSP000004	French Spaniel	Breed_Dogs	SAMN19522826	SRR14750439	FAM006583	2-ADN8631		Rennes	Michigan		YES	YES	YES	17.26	Female	A1
FRSP000005	French Spaniel	Breed_Dogs	SAMN19522827	SRR14750440	FAM006591	2-ADN8976		Rennes	Michigan		YES	YES	YES	20.12	Female	A1
FRSP000006	French Spaniel	Breed_Dogs	SAMN19522828	SRR14750441	FAM006592	2-ADN9009		Rennes	Michigan		YES	YES	YES	17.87	Female	A1
FXTE000001	Wire Fox Terrier	Breed_Dogs	SAMN21036306	SRR15734818	FX001	FAM005413		Bern	Bern		YES	YES	YES	18.9	Male	A1
FXTE000002	Wire Fox Terrier	Breed_Dogs	SAMN21035160	SRR16048632	KT141A1	FAM005663		Helsinki	Helsinki		YES	YES	YES	20	Male	A1
FXTE000003	Smooth Fox Terrier	Breed_Dogs	SAMN21035161	SRR16048630	KT143A1	FAM005664		Helsinki	Helsinki		YES	YES	YES	18.45	Male	B1
FXTE000004	Smooth Fox Terrier	Breed_Dogs	SAMN21035162	SRR16048629	KT157A1	FAM005665		Helsinki	Helsinki		YES	YES	YES	21.59	Male	A1
FXTE000005	Smooth Fox Terrier	Breed_Dogs	SAMN19522829	SRR14750442	FAM005917	2-ADN1149		Rennes	Michigan		YES	YES	YES	18.11	Male	A1
FXTE000006	Smooth Fox Terrier	Breed_Dogs	SAMN19522830	SRR14750443	FAM006625	3-ADNPR5013		Rennes	Michigan		YES	YES	YES	23.26	Male	C2
FXTE000007	Unknown	Breed_Dogs	SAMN19522831	SRR14750444	FAM005928	2-ADN12062		Rennes	Michigan		YES	NO	NO	21.08	Male	NotApplicable
FXTE000008	Fox Terrier	Mixed/Other	SAMN19522832	SRR14750294	FAM005957	2-ADN13586		Rennes	Michigan		YES	NO	NO	17.61	Female	NotApplicable
FXTE000009	Fox Terrier	Mixed/Other	SAMN19522833	SRR14750295	FAM006624	3-ADNPR4961		Rennes	Michigan		YES	NO	NO	18.65	Male	NotApplicable
GAFT000001	Great Anglo-French Tricolour Hound	Breed_Dogs	SAMN19522834	SRR14750296	FAM005958	4-ADN13611_1		Rennes	Michigan		YES	YES	YES	19.39	Female	A1
GAFT000002	Great Anglo-French Tricolour Hound	Breed_Dogs	SAMN19522835	SRR14750297	FAM005967	4-ADN13919		Rennes	Michigan		YES	YES	YES	17.44	Male	E
GAFT000003	Great Anglo-French Tricolour Hound	Breed_Dogs	SAMN19522836	SRR14750298	FAM005968	4-ADN13924		Rennes	Michigan		YES	YES	YES	17.37	Male	E
GAFT000004	Great Anglo-French Tricolour Hound	Breed_Dogs	SAMN19522837	SRR14750299	FAM005971	2-ADN13937		Rennes	Michigan		YES	YES	YES	18.06	Female	E
GAFT000005	Great Anglo-French Tricolour Hound	Breed_Dogs	SAMN19522838	SRR14750300	FAM005972	2-ADN13938		Rennes	Michigan		YES	YES	YES	17.9	Male	B1
GAFT000006	Great Anglo-French Tricolour Hound	Breed_Dogs	SAMN19522839	SRR14750301	FAM005974	2-ADN13943		Rennes	Michigan		YES	YES	YES	19.47	Male	E
GALG000001	Galgo Espanol	Breed_Dogs	SAMN21035163	SRR16048628	ESV001B1	FAM006704		Helsinki	Helsinki		YES	YES	YES	17.85	Female	A1
GALG000002	Galgo Espanol	Breed_Dogs	SAMN21035164	SRR16048627	ESV003B1	FAM006705		Helsinki	Helsinki		YES	YES	YES	20.53	Female	A1
GALG000003	Galgo Espanol	Breed_Dogs	SAMN21035165	SRR16048626	ESV005A1	FAM006706		Helsinki	Helsinki		YES	YES	YES	19.26	Male	B1
GALG000004	Galgo Espanol	Breed_Dogs	SAMN21035166	SRR16048625	ESV010A1	FAM006707		Helsinki	Helsinki		YES	YES	YES	17.41	Male	B1
GALG000005	Galgo Espanol	Breed_Dogs	SAMN19522840	SRR14750302	FAM006607	2-ADNPR3322		Rennes	Michigan		YES	YES	YES	18.85	Female	A1
GALG000006	Galgo Espanol	Breed_Dogs	SAMN19522841	SRR14750303	FAM006619	2-ADNPR4350		Rennes	Michigan		YES	YES	YES	18.23	Male	A1
GAWO000001	Great Anglo-French White and Orange Hound	Breed_Dogs	SAMN19522842	SRR14750305	FAM005965	4-ADN13877_1		Rennes	Michigan		YES	YES	YES	21.63	Male	A1
GAWO000002	Great Anglo-French White and Orange Hound	Breed_Dogs	SAMN19522843	SRR14750306	FAM005969	4-ADN13927		Rennes	Michigan		YES	YES	YES	16.82	Female	A1
GAWO000003	Great Anglo-French White and Orange Hound	Breed_Dogs	SAMN19522844	SRR14750307	FAM005970	2-ADN13936		Rennes	Michigan		YES	YES	YES	19.95	Male	A1
GAWO000004	Great Anglo-French White and Orange Hound	Breed_Dogs	SAMN19522845	SRR14750308	FAM005973	3-ADN13940		Rennes	Michigan		YES	YES	YES	19.93	Female	E
GAWO000005	Great Anglo-French White and Orange Hound	Breed_Dogs	SAMN19522846	SRR14750309	FAM005975	4-ADN13945		Rennes	Michigan		YES	YES	YES	21.94	Female	A1
GAWO000006	Great Anglo-French White and Orange Hound	Breed_Dogs	SAMN19522847	SRR14750310	FAM005989	3-ADN23355		Rennes	Michigan		YES	YES	YES	18.05	Male	A1
GBGA000001	Grand Bleu de Gascogne	Breed_Dogs	SAMN19522848	SRR14750311	FAM006588	2-ADN889		Rennes	Michigan		YES	YES	YES	18.57	Male	A1
GBGV000001	Grand Basset Griffon Vendeen	Breed_Dogs	SAMN15625855	SRR12330331	FAM007353	5370		NHGRI	Uppsala		YES	YES	YES	18.81	Female	B1
GBGV000002	Grand Basset Griffon Vendeen	Breed_Dogs	SAMN15625856	SRR12330330	FAM007354	5372		NHGRI	Uppsala		YES	YES	YES	17.33	Female	B1
GBGV000003	Grand Basset Griffon Vendeen	Breed_Dogs	SAMN15625857	SRR12330329	FAM007355	5373		NHGRI	Uppsala		YES	YES	YES	17.37	Female	B1
GBGV000004	Grand Basset Griffon Vendeen	Breed_Dogs	SAMN21036307	SRR15734742	GB001	FAM005414		Bern	Bern		YES	YES	YES	21.17	Female	B1
GBGV000005	Grand Basset Griffon Vendeen	Breed_Dogs	SAMN20151380	SRR15100201	BGV046	FAM005228		Helsinki	Helsinki		YES	YES	YES	18.38	Male	B1
GFBR000001	Griffon Fauve de Bretagne	Breed_Dogs	SAMN21035167	SRR16048624	GFB003A1	FAM006711		Helsinki	Helsinki		YES	YES	YES	18.02	Male	A1
GGVE000001	Grand Griffon Vendeen	Breed_Dogs	SAMN21035168	SRR16048595	GGV001A1	FAM006712		Helsinki	Helsinki		YES	YES	YES	19.33	Female	B1
GGVE000002	Grand Griffon Vendeen	Breed_Dogs	SAMN21035169	SRR16048594	GGV002A1	FAM006713		Helsinki	Helsinki		YES	YES	YES	19.52	Female	A1
GHND000001	German Hound	Breed_Dogs	SAMN21036227	SRR15734700	BK003	FAM005475		Bern	Bern		YES	YES	YES	17.5	Female	B1
GHND000002	German Hound	Breed_Dogs	SAMN21036228	SRR15734699	BK004	FAM005476		Bern	Bern		YES	YES	YES	18.62	Male	B1
GHND000003	German Hound	Breed_Dogs	SAMN21036229	SRR15734697	BK009	FAM005477		Bern	Bern		YES	YES	YES	18.02	Male	B1
GHND000004	German Hound	Breed_Dogs	SAMN21036230	SRR15734696	BK012	FAM005478		Bern	Bern		YES	YES	YES	17.53	Female	B1
GHND000005	German Hound	Breed_Dogs	SAMN21036231	SRR15734695	BK015	FAM005479		Bern	Bern		YES	YES	YES	18.26	Male	B1
GHND000006	German Hound	Breed_Dogs	SAMN21036232	SRR15734694	BK016	FAM005480		Bern	Bern		YES	YES	YES	17.46	Male	B1
GHUT000001	German Hunting Terrier	Breed_Dogs	SAMN21036348	SRR15734664	JT016	FAM005594		Bern	Bern		YES	YES	YES	20.29	Male	A1
GHUT000002	German Hunting Terrier	Breed_Dogs	SAMN21036349	SRR15734663	JT021	FAM005595		Bern	Bern		YES	YES	YES	20.65	Male	A1
GHUT000003	German Hunting Terrier	Breed_Dogs	SAMN21035170	SRR16048593	SMT001A1	FAM005818		Helsinki	Helsinki		YES	YES	YES	17.86	Female	A1
GHUT000004	German Hunting Terrier	Breed_Dogs	SAMN21035171	SRR16048591	SMT138A1	FAM005819		Helsinki	Helsinki		YES	YES	YES	19.76	Female	A1
GHUT000005	German Hunting Terrier	Breed_Dogs	SAMN19522849	SRR14750312	FAM006525	2-ADN4201		Rennes	Michigan		YES	YES	YES	21.41	Female	A1
GHUT000006	German Hunting Terrier	Breed_Dogs	SAMN19522850	SRR14750313	FAM006528	2-ADN4365		Rennes	Michigan		YES	YES	YES	18.78	Male	A1
GLEN000001	Glen of Imaal Terrier	Breed_Dogs	SAMN15625858	SRR12330328	FAM007179	4258		NHGRI	Michigan		YES	YES	YES	20.24	Female	A1
GLEN000002	Glen of Imaal Terrier	Breed_Dogs	SAMN15625859	SRR12330327	FAM007352	4261		NHGRI	Uppsala		YES	YES	YES	15.93	Female	A1
GLEN000003	Glen of Imaal Terrier	Breed_Dogs	SAMN15625860	SRR12330326	FAM007180	4263		NHGRI	Michigan		YES	YES	YES	24.29	Male	A1
GLEN000004	Glen of Imaal Terrier	Breed_Dogs	SAMN15625861	SRR12330324	FAM007181	4265		NHGRI	Michigan		YES	YES	YES	20.62	Male	A1
GLEN000005	Glen of Imaal Terrier	Breed_Dogs	SAMN15625862	SRR12330323	FAM007182	4266		NHGRI	Michigan		YES	YES	YES	20.66	Female	A1
GLEN000006	Glen of Imaal Terrier	Breed_Dogs	SAMN15625863	SRR12330322	FAM007183	4268		NHGRI	Michigan		YES	YES	YES	21.24	Male	A1
GMSP000001	German Spaniel	Breed_Dogs	SAMN21036285	SRR15734882	DW029	FAM005577		Bern	Bern		YES	YES	YES	17.52	Female	A1
GMSP000002	German Spaniel	Breed_Dogs	SAMN21036286	SRR15734881	DW087	FAM005578		Bern	Bern		YES	YES	YES	16.65	Female	A1
GMSP000003	German Spaniel	Breed_Dogs	SAMN21036287	SRR15734880	DW096	FAM005579		Bern	Bern		YES	YES	YES	20.81	Male	A1
GMSP000004	German Spaniel	Breed_Dogs	SAMN21036288	SRR15734879	DW1087	FAM005580		Bern	Bern		YES	YES	YES	19.52	Female	A1
GMSP000005	German Spaniel	Breed_Dogs	SAMN21035172	SRR16048590	VK001A1	FAM005872		Helsinki	Helsinki		YES	YES	YES	18.82	Female	A1
GMSP000006	German Spaniel	Breed_Dogs	SAMN21035173	SRR16048589	VK002A1	FAM005873		Helsinki	Helsinki		YES	YES	YES	17.57	Male	A1
GOLD000001	Golden Retriever	Breed_Dogs	SAMN15625864	SRR12330321	FAM007029	797		NHGRI	Michigan		YES	YES	YES	18.58	Female	A1
GOLD000002	Golden Retriever	Breed_Dogs	SAMN21036313	SRR16289000	GR0057	FAM004630		Bern	Uppsala		YES	YES	YES	19.84	Female	B1
GOLD000003	Golden Retriever	Breed_Dogs	SAMN21036314	SRR16288999	GR0116	FAM004631		Bern	Uppsala		YES	YES	YES	18.4	Female	B1
GOLD000004	Golden Retriever	Breed_Dogs	SAMN21036315	SRR16288998	GR0117	FAM004632		Bern	Uppsala		YES	YES	YES	18.87	Female	B1
GOLD000005	Golden Retriever	Breed_Dogs	SAMN21036316	SRR16288997	GR0216	FAM004633		Bern	Uppsala		YES	YES	YES	18.36	Male	A1
GOLD000007	Golden Retriever	Breed_Dogs	SAMN21036318	SRR16288996	GR0427	FAM004635		Bern	Uppsala		YES	YES	YES	31.06	Male	B1
GORD000002	Gordon Setter	Breed_Dogs	SAMN21035174	SRR16048588	GOR010A1	FAM005343		Helsinki	Helsinki		YES	YES	YES	19.97	Female	A1
GPIN000001	German Pinscher	Breed_Dogs	SAMN21036283	SRR15734884	DP200	FAM005575		Bern	Bern		YES	YES	YES	19.78	Male	C1
GPIN000002	German Pinscher	Breed_Dogs	SAMN21036284	SRR15734883	DP201	FAM005576		Bern	Bern		YES	YES	YES	19.05	Female	C2
GPIN000003	German Pinscher	Breed_Dogs	SAMN21035175	SRR16048587	PI074A1	FAM005737		Helsinki	Helsinki		YES	YES	YES	19.3	Female	C2
GPIN000004	German Pinscher	Breed_Dogs	SAMN21035176	SRR16048586	PI107A1	FAM005738		Helsinki	Helsinki		YES	YES	YES	18.79	Male	A1
GPYR000001	Great Pyrenees	Breed_Dogs	SAMN21036422	SRR15734836	PB001	FAM005436		Bern	Bern		YES	YES	YES	17.74	Female	B1
GPYR000002	Great Pyrenees	Breed_Dogs	SAMN21036423	SRR15734834	PB006	FAM005437		Bern	Bern		YES	YES	YES	17.94	Male	B1
GPYR000003	Great Pyrenees	Breed_Dogs	SAMN21035177	SRR16048585	PY050A1	FAM005782		Helsinki	Helsinki		YES	YES	YES	20.72	Male	A1
GPYR000004	Great Pyrenees	Breed_Dogs	SAMN21035178	SRR16048584	PY051A1	FAM005783		Helsinki	Helsinki		YES	YES	YES	20.75	Female	A1
GPYR000005	Great Pyrenees	Breed_Dogs	SAMN19522851	SRR14750314	FAM006575	2-ADN8215		Rennes	Michigan		YES	YES	YES	18.73	Female	A1
GPYR000006	Great Pyrenees	Breed_Dogs	SAMN19522852	SRR14750316	FAM006579	2-ADN8385		Rennes	Michigan		YES	YES	YES	19.19	Female	B1
GREE000001	Greenland Dog	Breed_Dogs	SAMN21036308	SRR15734740	GH001	FAM005493		Bern	Bern		YES	YES	YES	17.85	Female	A1
GREE000002	Greenland Dog	Breed_Dogs	SAMN21036309	SRR15734739	GH003	FAM005494		Bern	Bern		YES	YES	YES	17.8	Female	A1
GREE000003	Greenland Dog	Breed_Dogs	SAMN21036310	SRR15734738	GH015	FAM005495		Bern	Bern		YES	YES	YES	19.67	Male	A1
GRIF000001	Griffon	Breed_Dogs	SAMN19522956	SRR14750367	FAM006514	2-ADN3960		Rennes	Michigan		NO	NO	NO	17.9	Male	NotApplicable
GRIF000002	Griffon	Breed_Dogs	SAMN19522957	SRR14750368	FAM006617	3-ADNPR4338		Rennes	Michigan		NO	NO	NO	20	Male	NotApplicable
GRND000001	Groenendael	Breed_Dogs	SAMN21036373	SRR15734650	MA193	FAM005605		Bern	Bern		YES	YES	YES	20.11	Male	B1
GRND000002	Groenendael	Breed_Dogs	SAMN19522853	SRR14750317	FAM005919	2-ADN11532		Rennes	Michigan		YES	YES	YES	17.58	Male	A1
GRND000003	Groenendael	Breed_Dogs	SAMN19522854	SRR14750318	FAM006539	2-ADN5305		Rennes	Michigan		YES	YES	YES	18.6	Male	B1
GRNI000001	Griffon Nivernais	Breed_Dogs	SAMN19522855	SRR14750319	FAM005947	3-ADN1281		Rennes	Michigan		YES	YES	YES	20.3	Male	B1
GRNI000002	Griffon Nivernais	Breed_Dogs	SAMN19522856	SRR14750320	FAM005990	3-ADN2365		Rennes	Michigan		YES	YES	YES	18.09	Male	A1
GRNI000003	Griffon Nivernais	Breed_Dogs	SAMN19522857	SRR14750321	FAM005991	3-ADN2425		Rennes	Michigan		YES	YES	YES	19	Female	A1
GRNI000004	Griffon Nivernais	Breed_Dogs	SAMN19522858	SRR14750322	FAM005999	3-ADN3153		Rennes	Michigan		YES	YES	YES	18.2	Female	A1
GRNI000005	Griffon Nivernais	Breed_Dogs	SAMN19522859	SRR14750323	FAM006504	3-ADN3255		Rennes	Michigan		YES	YES	YES	18.22	Male	A1
GRNI000006	Griffon Nivernais	Breed_Dogs	SAMN19522860	SRR14750324	FAM006593	3-ADN906		Rennes	Michigan		YES	YES	YES	18.99	Male	A1
GRSD000001	German Shepherd Dog	Breed_Dogs	SAMN15625865	SRR12330320	FAM007078	12786		NHGRI	Michigan		NO	NO	NO	18.58	Female	NotApplicable
GRSD000002	German Shepherd Dog	Breed_Dogs	SAMN15625866	SRR12330319	FAM007083	13170		NHGRI	Michigan		YES	YES	YES	19.86	Female	B1
GRSD000003	German Shepherd Dog	Breed_Dogs	SAMN15625867	SRR12330318	FAM007092	14567		NHGRI	Michigan		YES	YES	YES	18.68	Male	A1
GSHP000001	German Shorthaired Pointer	Breed_Dogs	SAMN15625868	SRR12330317	FAM007141	30644		NHGRI	Michigan		YES	YES	YES	17.72	Female	B1
GSHP000002	German Shorthaired Pointer	Breed_Dogs	SAMN15625869	SRR12330316	FAM007142	30645		NHGRI	Michigan		YES	YES	YES	21.87	Female	B1
GSHP000003	German Shorthaired Pointer	Breed_Dogs	SAMN19522861	SRR14750445	FAM005901	2-ADN10673		Rennes	Michigan		YES	YES	YES	17.12	Female	A1
GSHP000004	German Shorthaired Pointer	Breed_Dogs	SAMN19522862	SRR14750447	FAM005949	2-ADN12840		Rennes	Michigan		YES	YES	YES	17.49	Female	A1
GSMD000001	Greater Swiss Mountain Dog	Breed_Dogs	SAMN15625870	SRR12330315	FAM007221	25402		NHGRI	Michigan		YES	YES	YES	21.26	Male	A1
GSMD000002	Greater Swiss Mountain Dog	Breed_Dogs	SAMN21036459	SRR15734792	SH001	FAM005452		Bern	Bern		YES	YES	YES	17.34	Female	A1
GSMD000003	Greater Swiss Mountain Dog	Breed_Dogs	SAMN21036460	SRR15734791	SH004	FAM005453		Bern	Bern		YES	YES	YES	17.26	Female	A1
GSMD000004	Greater Swiss Mountain Dog	Breed_Dogs	SAMN19522863	SRR14750448	FAM006503	4-ADN3240		Rennes	Michigan		YES	YES	YES	21.5	Male	A1
GSMD000005	Greater Swiss Mountain Dog	Breed_Dogs	SAMN21036461	SRR16288955	SH019	FAM004606		Bern	Uppsala		YES	YES	YES	19.11	Male	A1
GSMD000006	Greater Swiss Mountain Dog	Breed_Dogs	SAMN21036462	SRR16288954	SH027	FAM004607		Bern	Uppsala		YES	YES	YES	19.8	Male	A1
GSMD000007	Greater Swiss Mountain Dog	Breed_Dogs	SAMN21036463	SRR16288953	SH034	FAM004608		Bern	Uppsala		YES	YES	YES	17.58	Female	A1
GSMD000008	Greater Swiss Mountain Dog	Breed_Dogs	SAMN21036464	SRR16288952	SH047	FAM004609		Bern	Uppsala		YES	YES	YES	19.31	Male	A1
GSMD000009	Greater Swiss Mountain Dog	Breed_Dogs	SAMN21036465	SRR16288951	SH055	FAM004610		Bern	Uppsala		YES	YES	YES	23.34	Female	A1
GSMD000010	Greater Swiss Mountain Dog	Breed_Dogs	SAMN21036466	SRR16288950	SH061	FAM004611		Bern	Uppsala		YES	YES	YES	19.7	Male	A1
GSNZ000001	Giant Schnauzer	Breed_Dogs	SAMN15625871	SRR12330313	FAM007215	21939		NHGRI	Michigan		YES	YES	YES	21.41	Female	A1
GSNZ000002	Giant Schnauzer	Breed_Dogs	SAMN15625872	SRR12330312	FAM007223	26265		NHGRI	Michigan		YES	YES	YES	20.17	Male	A1
GSNZ000003	Giant Schnauzer	Breed_Dogs	SAMN21036443	SRR15734803	RS025	FAM005518		Bern	Bern		YES	YES	YES	19.18	Male	A1
GSNZ000004	Giant Schnauzer	Breed_Dogs	SAMN21035179	SRR16048583	SSN141A1	FAM005827		Helsinki	Helsinki		YES	YES	YES	20.6	Female	A1
GSNZ000005	Giant Schnauzer	Breed_Dogs	SAMN21035180	SRR16048582	SSN269A1	FAM005828		Helsinki	Helsinki		YES	YES	YES	18.97	Female	A1
GSNZ000006	Giant Schnauzer	Breed_Dogs	SAMN19522864	SRR14750449	FAM006620	2-ADNPR4467		Rennes	Michigan		YES	YES	YES	21.61	Male	A1
GSPK000001	German Spitz Klein	Breed_Dogs	SAMN21036362	SRR15734655	KS072	FAM005599		Bern	Bern		YES	YES	YES	17.88	Female	A1
GSPK000002	German Spitz Klein	Breed_Dogs	SAMN21036363	SRR15734654	KS073	FAM005600		Bern	Bern		YES	YES	YES	18.84	Female	C1
GSPK000003	German Spitz Klein	Breed_Dogs	SAMN21036364	SRR15734653	KS074	FAM005601		Bern	Bern		YES	YES	YES	18.68	Female	A1
GSPK000004	German Spitz Klein	Breed_Dogs	SAMN21035181	SRR16048580	KSP030A1	FAM005660		Helsinki	Helsinki		YES	YES	YES	18.01	Female	A1
GSPK000005	German Spitz Klein	Breed_Dogs	SAMN21035182	SRR16048579	KSP038A1	FAM005661		Helsinki	Helsinki		YES	YES	YES	19.85	Male	B1
GSPK000006	German Spitz Klein	Breed_Dogs	SAMN21035183	SRR16048578	KSP046A1	FAM005662		Helsinki	Helsinki		YES	YES	YES	18.79	Male	C2
GSPK000007	German Spitz Klein	Breed_Dogs	SAMN21036357	SRR16288981	KS004	FAM004656		Bern	Uppsala		YES	YES	YES	17.97	Female	C2
GSPK000008	German Spitz Klein	Breed_Dogs	SAMN21036358	SRR16288980	KS007	FAM004657		Bern	Uppsala		YES	YES	YES	24.35	Female	B1
GSPK000009	German Spitz Klein	Breed_Dogs	SAMN21036359	SRR16288978	KS014	FAM004658		Bern	Uppsala		YES	YES	YES	21.97	Female	A1
GSPK000010	German Spitz Klein	Breed_Dogs	SAMN21036360	SRR16288977	KS032	FAM004659		Bern	Uppsala		YES	YES	YES	22.03	Female	A1
GSPK000011	German Spitz Klein	Breed_Dogs	SAMN21036361	SRR16288976	KS035	FAM004660		Bern	Uppsala		YES	YES	YES	22.32	Female	A1
GSPZ000001	German Spitz	Breed_Dogs	SAMN21036325	SRR15734730	GS048	FAM005589		Bern	Bern		YES	YES	YES	19.24	Male	A1
GSPZ000002	German Spitz	Breed_Dogs	SAMN21036328	SRR15734729	GS100	FAM005590		Bern	Bern		YES	YES	YES	19.74	Female	A1
GSPZ000003	German Spitz	Breed_Dogs	SAMN21036319	SRR15734735	GS001	FAM005585		Bern	Bern		YES	YES	YES	17.36	Female	A1
GSPZ000004	German Spitz	Breed_Dogs	SAMN21036320	SRR15734734	GS002	FAM005586		Bern	Bern		YES	YES	YES	17.07	Female	A1
GSPZ000005	German Spitz	Breed_Dogs	SAMN21036321	SRR15734733	GS010	FAM005587		Bern	Bern		YES	YES	YES	17.32	Male	A1
GSPZ000006	German Spitz	Breed_Dogs	SAMN21036322	SRR15734732	GS011	FAM005588		Bern	Bern		YES	YES	YES	19.44	Male	A1
GSZG000001	German Giant Spitz	Breed_Dogs	SAMN21036323	SRR16288995	GS012	FAM004649		Bern	Uppsala		YES	YES	YES	20.29	Male	A1
GSZG000002	German Giant Spitz	Breed_Dogs	SAMN21036324	SRR16288994	GS013	FAM004650		Bern	Uppsala		YES	YES	YES	21.47	Female	A1
GSZG000003	German Giant Spitz	Breed_Dogs	SAMN21036326	SRR16288993	GS058	FAM004651		Bern	Uppsala		YES	YES	YES	17.79	Female	A1
GSZG000004	German Giant Spitz	Breed_Dogs	SAMN21036327	SRR16288992	GS070	FAM004652		Bern	Uppsala		YES	YES	YES	21.06	Male	A1
GSZG000005	German Giant Spitz	Breed_Dogs	SAMN21036329	SRR16288991	GS108	FAM004653		Bern	Uppsala		YES	YES	YES	22	Male	B1
GSZG000006	German Giant Spitz	Breed_Dogs	SAMN21036330	SRR16288989	GS119	FAM004654		Bern	Uppsala		YES	YES	YES	21	Male	A1
GSZG000007	Pomeranian	Breed_Dogs	SAMN21036356	SRR16288982	KS003	FAM004655		Bern	Uppsala		YES	YES	YES	21.57	Female	C2
GSZM000001	German Spitz Mittel	Breed_Dogs	SAMN21036384	SRR15734871	MS009	FAM005610		Bern	Bern		YES	YES	YES	20.68	Female	A1
GSZM000002	German Spitz Mittel	Breed_Dogs	SAMN21036385	SRR15734870	MS010	FAM005611		Bern	Bern		YES	YES	YES	16.73	Female	A1
GSZM000003	German Spitz Mittel	Breed_Dogs	SAMN21036386	SRR15734869	MS011	FAM005612		Bern	Bern		YES	YES	YES	20.98	Male	A1
GSZM000004	German Spitz Mittel	Breed_Dogs	SAMN21036387	SRR15734867	MS019	FAM005613		Bern	Bern		YES	YES	YES	17.9	Female	A1
GSZM000005	German Spitz Mittel	Breed_Dogs	SAMN21035184	SRR16048577	MSP115A1	FAM005699		Helsinki	Helsinki		YES	YES	YES	17.67	Female	A1
GSZM000006	German Spitz Mittel	Breed_Dogs	SAMN21035185	SRR16048576	MSP116A1	FAM005700		Helsinki	Helsinki		YES	YES	YES	18.51	Male	A1
GSZM000007	German Spitz Mittel	Breed_Dogs	SAMN21036389	SRR16288967	MS48	FAM004667		Bern	Uppsala		YES	YES	YES	25.65	Female	A1
GSZM000008	German Spitz Mittel	Breed_Dogs	SAMN21036390	SRR16288966	MS50	FAM004668		Bern	Uppsala		YES	YES	YES	18.39	Female	A1
GSZM000009	German Spitz Mittel	Breed_Dogs	SAMN21036391	SRR16288965	MS59	FAM004669		Bern	Uppsala		YES	YES	YES	21.03	Female	C1
GSZM000010	German Spitz Mittel	Breed_Dogs	SAMN21036392	SRR16288964	MS63	FAM004670		Bern	Uppsala		YES	YES	YES	25.02	Female	A1
GSZM000011	German Spitz Mittel	Breed_Dogs	SAMN21036393	SRR16288963	MS66	FAM004671		Bern	Uppsala		YES	YES	YES	24.31	Male	A1
GSZM000012	German Spitz Mittel	Breed_Dogs	SAMN21036388	SRR16288969	MS100	FAM004672		Bern	Uppsala		YES	YES	YES	22.71	Male	A1
GTLH000001	Gotland Hound	Breed_Dogs	SAMN21035186	SRR16048575	GOT002A1	FAM006714		Helsinki	Helsinki		YES	YES	YES	19.58	Male	A1
GWHP000001	German Wirehaired Pointer	Breed_Dogs	SAMN15625873	SRR12330311	FAM007043	2484		NHGRI	Michigan		YES	YES	YES	18.66	Female	A1
GWHP000002	German Wirehaired Pointer	Breed_Dogs	SAMN15625874	SRR12330310	FAM007044	2486		NHGRI	Michigan		YES	YES	YES	19.79	Male	A1
GWHP000003	German Wirehaired Pointer	Breed_Dogs	SAMN21036331	SRR15734728	GW042	FAM005496		Bern	Bern		YES	YES	YES	17.88	Female	A1
GWHP000004	German Wirehaired Pointer	Breed_Dogs	SAMN20151466	SRR15100254	DDK140A1	FAM005314		Helsinki	Helsinki		YES	YES	YES	19.47	Male	A1
GWHP000005	German Wirehaired Pointer	Breed_Dogs	SAMN19522865	SRR14750450	FAM006563	2-ADN7411		Rennes	Michigan		YES	YES	YES	22.31	Female	B1
HAEL000001	Hallefors Elkhound	Breed_Dogs	SAMN21035187	SRR16048574	HAL001A1	FAM005347		Helsinki	Helsinki		YES	YES	YES	20.37	Female	D1
HARR000001	Harrier	Breed_Dogs	SAMN19522866	SRR14750451	FAM006511	2-ADN3779		Rennes	Michigan		YES	YES	YES	17.46	Female	B1
HARR000002	Harrier	Breed_Dogs	SAMN19522867	SRR14750452	FAM006512	2-ADN3888		Rennes	Michigan		YES	YES	YES	18.11	Male	B1
HARR000003	Harrier	Breed_Dogs	SAMN19522868	SRR14750453	FAM006526	2-ADN4288		Rennes	Michigan		YES	YES	YES	18.29	Female	B1
HAVA000001	Havanese	Breed_Dogs	SAMN20151388	SRR15100192	BIH280	FAM005236		Helsinki	Helsinki		YES	YES	YES	22.06	Female	B1
HAVA000002	Havanese	Breed_Dogs	SAMN20151389	SRR15100191	BIH298	FAM005237		Helsinki	Helsinki		YES	YES	YES	21.72	Male	B1
HAVA000003	Havanese	Breed_Dogs	SAMN20151390	SRR15100190	BIH299	FAM005238		Helsinki	Helsinki		YES	YES	YES	22.35	Female	B1
HELH000001	Hellenic Hound	Breed_Dogs	SAMN21035188	SRR16048573	KAK001A1	FAM006737		Helsinki	Helsinki		YES	YES	YES	20.8	Female	A1
HOBO000001	Hortaya Borzaya	Breed_Dogs	SAMN21035189	SRR16048572	HOB001A2	FAM005351		Helsinki	Helsinki		YES	YES	YES	20.72	Female	A1
HOBO000002	Hortaya Borzaya	Breed_Dogs	SAMN21035190	SRR16048571	HOB002A2	FAM005352		Helsinki	Helsinki		YES	YES	YES	19.39	Male	B1
HOKK000001	Hokkaido	Breed_Dogs	SAMN21035191	SRR16048569	HOK001A1	FAM006722		Helsinki	Helsinki		YES	YES	YES	18.86	Female	A1
HOKK000002	Hokkaido	Breed_Dogs	SAMN21035192	SRR16048568	HOK002A1	FAM006723		Helsinki	Helsinki		YES	YES	YES	18.53	Female	A1
HOKK000003	Hokkaido	Breed_Dogs	SAMN21035193	SRR16048511	HOK003A1	FAM006724		Helsinki	Helsinki		NO	NO	NO	17.04	Male	NotApplicable
HOVA000001	Hovawart	Breed_Dogs	SAMN21036335	SRR15734724	HW1946	FAM005591		Bern	Bern		YES	YES	YES	16.84	Male	A1
HOVA000002	Hovawart	Breed_Dogs	SAMN21036336	SRR15734723	HW1993	FAM005592		Bern	Bern		YES	YES	YES	18.69	Male	B1
HOVA000003	Hovawart	Breed_Dogs	SAMN21035194	SRR16048510	HW084A1	FAM005355		Helsinki	Helsinki		YES	YES	YES	17.81	Female	A1
HOVA000004	Hovawart	Breed_Dogs	SAMN19522869	SRR14750454	FAM006527	2-ADN4324		Rennes	Michigan		YES	YES	YES	19.05	Male	A1
HSHP000001	Vizsla	Breed_Dogs	SAMN21035195	SRR16048509	UVS009A1	FAM005856		Helsinki	Helsinki		YES	YES	YES	17.17	Female	A1
HSHP000002	Vizsla	Breed_Dogs	SAMN21035196	SRR21120998	UVS010A1	FAM005857		Helsinki	Helsinki		NO	NO	NO	0.24	Female	NotApplicable
HTSV000001	Hamiltonstovare	Breed_Dogs	SAMN21035197	SRR16048508	HAK001A1	FAM006715		Helsinki	Helsinki		YES	YES	YES	20.24	Female	A1
HTSV000002	Hamiltonstovare	Breed_Dogs	SAMN21035198	SRR16048507	HAK002A1	FAM006716		Helsinki	Helsinki		YES	YES	NO	18.59	Female	A1
HTSV000003	Hamiltonstovare	Breed_Dogs	SAMN21035199	SRR16048506	HAK003A1	FAM006717		Helsinki	Helsinki		YES	YES	YES	19.6	Male	B1
HTSV000004	Hamiltonstovare	Breed_Dogs	SAMN21035200	SRR16048505	HAK004A1	FAM006718		Helsinki	Helsinki		YES	YES	NO	21.54	Female	A1
HTSV000005	Hamiltonstovare	Breed_Dogs	SAMN21035201	SRR16048503	HAK005A1	FAM006719		Helsinki	Helsinki		YES	YES	YES	21.95	Female	A1
HTSV000006	Hamiltonstovare	Breed_Dogs	SAMN21035202	SRR16048502	HAK006A1	FAM006720		Helsinki	Helsinki		YES	YES	YES	20.65	Male	A1
HTSV000007	Hamiltonstovare	Breed_Dogs	SAMN21035203	SRR16048501	HAK007A1	FAM006721		Helsinki	Helsinki		YES	YES	YES	19.13	Female	A1
HUNT000001	Huntaway	Breed_Dogs	SAMN29845211	SRR20326252	FAM009015	NZH14		Cornell	Uppsala		NO	NO	NO	5.69	Male	NotApplicable
HUNT000002	Huntaway	Breed_Dogs	SAMN29845212	SRR20326241	FAM009016	NZH26		Cornell	Uppsala		NO	NO	NO	3.61	Female	NotApplicable
HUNT000003	Huntaway	Breed_Dogs	SAMN29845213	SRR20326679	FAM009017	NZH29		Cornell	Uppsala		NO	NO	NO	1.7	Male	NotApplicable
HVSC000001	Hanoverian Scenthound	Breed_Dogs	SAMN21036334	SRR15734725	HV001	FAM005419		Bern	Bern		YES	YES	YES	20.17	Female	A1
HWHP000001	Vizsla	Breed_Dogs	SAMN21035204	SRR16048500	UVS005A1	FAM005855		Helsinki	Helsinki		YES	YES	YES	18.71	Male	A1
IBIZ000001	Ibizan Hound	Breed_Dogs	SAMN15625875	SRR12330309	FAM007356	1164		NHGRI	Uppsala		YES	YES	YES	19.45	Male	A1
IBIZ000002	Ibizan Hound	Breed_Dogs	SAMN15625876	SRR12330308	FAM007039	1171		NHGRI	Michigan		YES	YES	YES	19.77	Female	A1
IBIZ000003	Ibizan Hound	Breed_Dogs	SAMN15625877	SRR12330307	FAM007176	1172		NHGRI	Michigan		YES	YES	YES	18.1	Female	A1
IBIZ000004	Ibizan Hound	Breed_Dogs	SAMN15625878	SRR12330306	FAM007040	1228		NHGRI	Michigan		YES	YES	YES	18.24	Male	A1
IBIZ000005	Ibizan Hound	Breed_Dogs	SAMN15625879	SRR12330305	FAM007041	1230		NHGRI	Michigan		YES	YES	YES	20.02	Female	A1
IBIZ000006	Ibizan Hound	Breed_Dogs	SAMN15625880	SRR12330304	FAM007357	1316		NHGRI	Uppsala		YES	YES	YES	17.54	Female	A1
IBIZ000007	Ibizan Hound	Breed_Dogs	SAMN15625881	SRR12330302	FAM007358	21535		NHGRI	Uppsala		YES	YES	YES	15.81	Female	B1
IBIZ000008	Ibizan Hound	Breed_Dogs	SAMN21035205	SRR16048499	IP032A1	FAM005356		Helsinki	Helsinki	Ibizan Podenco smooth-haired	YES	YES	YES	18.05	Female	A1
IBIZ000009	Ibizan Hound	Breed_Dogs	SAMN21035206	SRR16048498	IP034A1	FAM005358		Helsinki	Helsinki	Ibizan Podenco smooth-haired	YES	YES	YES	18.24	Male	B1
IBIZ000010	Ibizan Hound	Breed_Dogs	SAMN21035207	SRR16048497	IP035A1	FAM005359		Helsinki	Helsinki	Ibizan Podenco smooth-haired	YES	YES	YES	21.89	Female	A1
IBIZ000011	Ibizan Hound	Breed_Dogs	SAMN21035208	SRR16048496	IP033A1	FAM005357		Helsinki	Helsinki	Ibizan Podenco wire-haired	YES	YES	YES	19.19	Male	A1
IBIZ000012	Ibizan Hound	Breed_Dogs	SAMN21035209	SRR16048495	IP042A1	FAM005360		Helsinki	Helsinki	Ibizan Podenco wire-haired	YES	YES	YES	19.9	Female	A1
IBIZ000013	Ibizan Hound	Breed_Dogs	SAMN21035210	SRR16048494	IP043A1	FAM005361		Helsinki	Helsinki	Ibizan Podenco wire-haired	YES	YES	YES	20.41	Female	A1
ICES000001	Icelandic Sheepdog	Breed_Dogs	SAMN15625882	SRR12330301	FAM007145	30707		NHGRI	Michigan		YES	YES	YES	19.28	Male	A1
ICES000002	Icelandic Sheepdog	Breed_Dogs	SAMN15625883	SRR12330300	FAM007146	30708		NHGRI	Michigan		YES	YES	YES	18.66	Female	A1
ICES000003	Icelandic Sheepdog	Breed_Dogs	SAMN15625884	SRR12330299	FAM007147	30709		NHGRI	Michigan		YES	YES	YES	19.15	Female	A1
ICES000004	Icelandic Sheepdog	Breed_Dogs	SAMN21035211	SRR16048492	ISL079A1	FAM005364		Helsinki	Helsinki		YES	YES	YES	17.93	Female	A1
ICES000005	Icelandic Sheepdog	Breed_Dogs	SAMN21035212	SRR16048491	ISL082A1	FAM005365		Helsinki	Helsinki		YES	YES	YES	18.59	Male	A1
ICES000006	Icelandic Sheepdog	Breed_Dogs	SAMN21035213	SRR16048490	ISL090A1	FAM005366		Helsinki	Helsinki		YES	YES	YES	21.61	Male	A1
IRIT000001	Irish Terrier	Breed_Dogs	SAMN15625885	SRR12330298	FAM007263	31717		NHGRI	Michigan		NO	NO	NO	11.33	Female	NotApplicable
IRIT000002	Irish Terrier	Breed_Dogs	SAMN21036338	SRR15734721	IT011	FAM005593		Bern	Bern		YES	YES	YES	20.5	Female	A1
IRIT000003	Irish Terrier	Breed_Dogs	SAMN21035214	SRR16048489	IRT093A1	FAM005362		Helsinki	Helsinki		YES	YES	YES	21.42	Male	A1
IRSE000001	Irish Setter	Breed_Dogs	SAMN15625886	SRR12330297	FAM007116	27334		NHGRI	Michigan		NO	NO	NO	9.12	Female	NotApplicable
IRSE000002	Irish Setter	Breed_Dogs	SAMN21036337	SRR15734722	IR031	FAM005497		Bern	Bern		YES	YES	YES	17.89	Male	A1
IRSE000003	Irish Setter	Breed_Dogs	SAMN21035215	SRR16048488	ISP385A1	FAM005367		Helsinki	Helsinki	Red Coat	YES	YES	YES	22.56	Male	B1
IRSE000004	Irish Setter	Breed_Dogs	SAMN19522870	SRR14750455	FAM006559	2-ADN6698		Rennes	Michigan		YES	YES	YES	17.95	Female	C1
IWSP000001	Irish Water Spaniel	Breed_Dogs	SAMN15625887	SRR12330296	FAM007148	30856		NHGRI	Michigan		YES	YES	YES	21.43	Male	A1
IWSP000002	Irish Water Spaniel	Breed_Dogs	SAMN15625888	SRR12330295	FAM007149	30861		NHGRI	Michigan		YES	YES	YES	20.88	Female	A1
IWSP000003	Irish Water Spaniel	Breed_Dogs	SAMN15625889	SRR12330294	FAM007150	30864		NHGRI	Michigan		YES	YES	YES	21.31	Male	A1
IWSP000004	Irish Water Spaniel	Breed_Dogs	SAMN21035216	SRR16048487	IRV126A1	FAM005363		Helsinki	Helsinki		YES	YES	YES	17.73	Female	A1
JSPZ000001	Japanese Spitz	Breed_Dogs	SAMN21036340	SRR15734719	JS004	FAM005498		Bern	Bern		YES	YES	YES	18.36	Male	A1
JSPZ000002	Japanese Spitz	Breed_Dogs	SAMN21036344	SRR15734718	JS037	FAM005636		Bern	Bern		YES	YES	YES	19.01	Male	A1
JSPZ000003	Japanese Spitz	Breed_Dogs	SAMN21036346	SRR15734717	JS074	FAM005637		Bern	Bern		YES	YES	YES	19.29	Female	C2
JSPZ000004	Japanese Spitz	Breed_Dogs	SAMN21035217	SRR16048486	JAP029A1	FAM005368		Helsinki	Helsinki		YES	YES	YES	23.94	Male	C2
JSPZ000005	Japanese Spitz	Breed_Dogs	SAMN21035218	SRR16048485	JAP074A1	FAM005369		Helsinki	Helsinki		YES	YES	YES	20.08	Male	B1
JSPZ000006	Japanese Spitz	Breed_Dogs	SAMN21035219	SRR16048484	JAP082A1	FAM005370		Helsinki	Helsinki		YES	YES	YES	19.74	Male	C2
JSPZ000007	Japanese Spitz	Breed_Dogs	SAMN21036339	SRR16288988	JS002	FAM004661		Bern	Uppsala		YES	YES	YES	18.22	Female	A1
JSPZ000008	Japanese Spitz	Breed_Dogs	SAMN21036341	SRR16288987	JS008	FAM004662		Bern	Uppsala		YES	YES	YES	22.33	Female	B1
JSPZ000009	Japanese Spitz	Breed_Dogs	SAMN21036342	SRR16288986	JS013	FAM004663		Bern	Uppsala		YES	YES	YES	19.2	Female	A1
JSPZ000010	Japanese Spitz	Breed_Dogs	SAMN21036343	SRR16288985	JS032	FAM004664		Bern	Uppsala		YES	YES	YES	19.26	Female	C2
JSPZ000011	Japanese Spitz	Breed_Dogs	SAMN21036345	SRR16288984	JS057	FAM004665		Bern	Uppsala		YES	YES	YES	19.69	Male	A1
JSPZ000012	Japanese Spitz	Breed_Dogs	SAMN21036347	SRR16288983	JS075	FAM004666		Bern	Uppsala		YES	YES	YES	25.98	Male	B1
KAIK000001	Kai Ken	Breed_Dogs	SAMN21035220	SRR16048483	KAI001A1	FAM006732		Helsinki	Helsinki		YES	YES	YES	17.75	Female	A1
KAIK000002	Kai Ken	Breed_Dogs	SAMN21035221	SRR16048481	KAI002A1	FAM006733		Helsinki	Helsinki		YES	YES	YES	19.3	Male	A1
KAIK000003	Kai Ken	Breed_Dogs	SAMN21035222	SRR16048480	KAI003A1	FAM006734		Helsinki	Helsinki		YES	YES	YES	19.25	Female	A1
KAIK000004	Kai Ken	Breed_Dogs	SAMN21035223	SRR16048479	KAI006A1	FAM006735		Helsinki	Helsinki		YES	YES	YES	16.46	Female	A1
KAIK000005	Kai Ken	Breed_Dogs	SAMN21035224	SRR16048478	KAI009A1	FAM006736		Helsinki	Helsinki		YES	YES	YES	20.22	Male	A1
KANG000001	Kangal	Breed_Dogs	SAMN29845575	SRR20326616	FAM004025	ZTD16061322		RIT	Michigan	Haymana/Ankara	NO	NO	NO	22.01	Male	NotApplicable
KANG000002	Kangal	Breed_Dogs	SAMN29845576	SRR20326615	FAM004032	ZTD16061321		RIT	Michigan		YES	YES	YES	18.09	Female	A1
KANG000003	Kangal	Breed_Dogs	SAMN29845577	SRR20326614	FAM004045	ZTD16061323		RIT	Michigan	Sivas	YES	YES	YES	20.92	Female	A1
KARS000001	Kars	Breed_Dogs	SAMN29845578	SRR20326613	FAM004012	ZTD16061296		RIT	Michigan		NO	NO	NO	19.06	Male	NotApplicable
KARS000002	Kars	Breed_Dogs	SAMN29845579	SRR20326612	FAM004020	ZTD16061293		RIT	Michigan		YES	YES	YES	18.54	Male	A1
KARS000003	Kars	Breed_Dogs	SAMN29845580	SRR20326611	FAM004024	ZTD16061292		RIT	Michigan		YES	YES	YES	18.33	Male	B1
KARS000004	Kars	Breed_Dogs	SAMN29845581	SRR20326610	FAM004026	ZTD16061295		RIT	Michigan		YES	YES	YES	19.05	Male	A1
KARS000005	Kars	Breed_Dogs	SAMN29845582	SRR20326609	FAM004050	ZTD16061711		RIT	Michigan		YES	YES	YES	24.65	Male	A1
KARS000006	Kars	Breed_Dogs	SAMN29845583	SRR20326608	FAM004051	ZTD16061712		RIT	Michigan		YES	YES	YES	22.99	Female	A1
KEES000001	Keeshond	Breed_Dogs	SAMN15626057	SRR12330019	FAM007360	34863		NHGRI	Uppsala		NO	NO	NO	16.01	Female	NotApplicable
KEES000002	Keeshond	Breed_Dogs	SAMN15626058	SRR12330107	FAM007361	35078		NHGRI	Uppsala		YES	YES	YES	17.25	Male	A1
KEES000003	Keeshond	Breed_Dogs	SAMN21036519	SRR15734745	WS005	FAM005631		Bern	Bern		YES	YES	YES	16.56	Male	A1
KEES000004	Keeshond	Breed_Dogs	SAMN21036520	SRR15734744	WS006	FAM005632		Bern	Bern		YES	YES	YES	18.91	Female	A1
KEES000005	Keeshond	Breed_Dogs	SAMN21035225	SRR16048477	KEE210A1	FAM005642		Helsinki	Helsinki		YES	YES	YES	24.37	Male	A1
KEES000006	Keeshond	Breed_Dogs	SAMN21035226	SRR16048476	KEE213A1	FAM005643		Helsinki	Helsinki		YES	YES	YES	17.65	Female	A1
KEES000007	Keeshond	Breed_Dogs	SAMN21036518	SRR16288934	WS001	FAM004643		Bern	Uppsala		YES	YES	YES	17.51	Female	A1
KEES000008	Keeshond	Breed_Dogs	SAMN21036521	SRR16288933	WS013	FAM004644		Bern	Uppsala		YES	YES	YES	21.75	Male	A1
KEES000009	Keeshond	Breed_Dogs	SAMN21036522	SRR16288932	WS083	FAM004645		Bern	Uppsala		YES	YES	YES	22.01	Male	A1
KEES000010	Keeshond	Breed_Dogs	SAMN21036523	SRR16288931	WS107	FAM004646		Bern	Uppsala		YES	YES	YES	26.28	Female	A1
KEES000011	Keeshond	Breed_Dogs	SAMN21036524	SRR16288930	WS110	FAM004647		Bern	Uppsala		YES	YES	YES	24.47	Female	A1
KEES000012	Keeshond	Breed_Dogs	SAMN21036525	SRR16288929	WS111	FAM004648		Bern	Uppsala		YES	YES	YES	23.55	Female	A1
KERY000001	Kerry Blue Terrier	Breed_Dogs	SAMN21036350	SRR15734662	KB002	FAM005420		Bern	Bern		YES	YES	YES	17.59	Female	A1
KERY000002	Kerry Blue Terrier	Breed_Dogs	SAMN21035227	SRR16048475	KET054A1	FAM005647		Helsinki	Helsinki		YES	YES	YES	19.27	Male	B1
KINT000001	Kintamani	Breed_Dogs	SAMN17023513	SRR13376350	FAM002018	OL1549		Oxford	Michigan	Bali Indonesia	YES	YES	YES	17.48	Female	A2
KISH000001	Kishu	Breed_Dogs	SAMN21035228	SRR16048474	KIS001A1	FAM006738		Helsinki	Helsinki		YES	YES	YES	17.62	Male	B1
KISH000002	Kishu	Breed_Dogs	SAMN21035229	SRR16048473	KIS002A1	FAM006739		Helsinki	Helsinki		YES	YES	YES	20.34	Female	A2
KISH000003	Kishu	Breed_Dogs	SAMN21035230	SRR16048472	KIS003A1	FAM006740		Helsinki	Helsinki		YES	YES	YES	16.62	Male	A2
KMUM000001	Small Munsterlander	Breed_Dogs	SAMN15625890	SRR12330293	FAM007258	31612		NHGRI	Michigan		YES	YES	YES	19.48	Female	A1
KMUM000002	Small Munsterlander	Breed_Dogs	SAMN15625891	SRR12330290	FAM007259	31614		NHGRI	Michigan		YES	YES	YES	20.02	Male	A1
KMUM000003	Small Munsterlander	Breed_Dogs	SAMN21036354	SRR15734658	KM001	FAM005421		Bern	Bern		YES	YES	YES	17.53	Female	A1
KMUM000004	Small Munsterlander	Breed_Dogs	SAMN21036355	SRR15734656	KM004	FAM005422		Bern	Bern		YES	YES	YES	17.57	Female	A1
KMUM000005	Small Munsterlander	Breed_Dogs	SAMN19522871	SRR14750456	FAM005911	2-ADN11167		Rennes	Michigan		YES	YES	YES	17.41	Female	A1
KMUM000006	Small Munsterlander	Breed_Dogs	SAMN19522872	SRR14750458	FAM006545	2-ADN5694		Rennes	Michigan		YES	YES	YES	18.58	Male	A1
KMUM000007	Small Munsterlander	Breed_Dogs	SAMN21035231	SRR16048470	MUS066A1	FAM005707		Helsinki	Helsinki		YES	YES	YES	18.15	Female	A1
KMUM000008	Small Munsterlander	Breed_Dogs	SAMN21035232	SRR16048469	MUS068A1	FAM005708		Helsinki	Helsinki		YES	YES	YES	18.37	Male	A1
KMUM000009	Small Munsterlander	Breed_Dogs	SAMN21035233	SRR16048468	MUS069A1	FAM005709		Helsinki	Helsinki		YES	YES	YES	18.25	Female	A1
KMUM000010	Small Munsterlander	Breed_Dogs	SAMN21035234	SRR16048467	MUS076A1	FAM005710		Helsinki	Helsinki		YES	YES	YES	18.86	Male	A1
KMUM000011	Small Munsterlander	Breed_Dogs	SAMN21035235	SRR16048466	MUS081A1	FAM005711		Helsinki	Helsinki		YES	YES	YES	18.13	Female	A1
KROM000001	Kromfohrlander	Breed_Dogs	SAMN21036351	SRR15734661	KF054	FAM005596		Bern	Bern		YES	YES	YES	19.22	Male	A1
KROM000002	Kromfohrlander	Breed_Dogs	SAMN21036352	SRR15734660	KF196	FAM005597		Bern	Bern		YES	YES	YES	18.82	Female	A1
KROM000003	Kromfohrlander	Breed_Dogs	SAMN21036353	SRR15734659	KF210	FAM005598		Bern	Bern		YES	YES	YES	20.4	Female	A1
KROM000004	Kromfohrlander	Breed_Dogs	SAMN21035236	SRR16048465	KRO277B1	FAM006745		Helsinki	Helsinki		YES	YES	YES	18.18	Female	A1
KROM000005	Kromfohrlander	Breed_Dogs	SAMN21035237	SRR16048464	KRO294A1	FAM006746		Helsinki	Helsinki		YES	YES	YES	17.88	Female	A1
KROM000006	Kromfohrlander	Breed_Dogs	SAMN21035238	SRR16048463	KRO298A1	FAM006747		Helsinki	Helsinki		YES	YES	YES	16.93	Female	A1
KROM000007	Kromfohrlander	Breed_Dogs	SAMN21035239	SRR16048462	KRO299A1	FAM006748		Helsinki	Helsinki		YES	YES	YES	19.39	Male	A1
KUVZ000001	Kuvasz	Breed_Dogs	SAMN15626059	SRR12330106	FAM007362	6230		NHGRI	Uppsala		YES	YES	YES	16.92	Male	A1
KUVZ000002	Kuvasz	Breed_Dogs	SAMN15626060	SRR12330105	FAM007363	7525		NHGRI	Uppsala		NO	NO	NO	12.5	Female	NotApplicable
KUVZ000003	Kuvasz	Breed_Dogs	SAMN15626061	SRR12330103	FAM007364	7774		NHGRI	Uppsala		YES	YES	YES	15.36	Female	B1
KUVZ000004	Kuvasz	Breed_Dogs	SAMN21035240	SRR16048461	KUZ001A1	FAM006749		Helsinki	Helsinki		YES	YES	YES	17.73	Female	B1
KUVZ000005	Kuvasz	Breed_Dogs	SAMN21035241	SRR16048458	KUZ006A2	FAM006750		Helsinki	Helsinki		YES	YES	YES	17.63	Male	A1
KUVZ000006	Kuvasz	Breed_Dogs	SAMN21035242	SRR16048457	KUZ007A2	FAM006751		Helsinki	Helsinki		YES	YES	YES	19.26	Female	A1
KUVZ000007	Kuvasz	Breed_Dogs	SAMN21035243	SRR16048456	KUZ018A1	FAM006752		Helsinki	Helsinki		YES	YES	YES	22.18	Male	B1
KUVZ000008	Kuvasz	Breed_Dogs	SAMN23424288	SRR17176028	FAM005423	KU001		Bern	Bern		YES	YES	YES	20.7	Female	A1
LABN000001	Labernese	Mixed/Other	SAMN19522873	SRR14750459	FAM005944	2-ADN12628		Rennes	Michigan		YES	NO	NO	19.52	Male	NotApplicable
LABN000002	Labernese	Mixed/Other	SAMN19522874	SRR14750460	FAM006626	3-ADNPR5024		Rennes	Michigan		YES	NO	NO	17.96	Female	NotApplicable
LABR000001	Labrador Retriever	Breed_Dogs	SAMN21036365	SRR16288975	LA0343	FAM004624		Bern	Uppsala		YES	YES	YES	23.19	Female	A1
LABR000002	Labrador Retriever	Breed_Dogs	SAMN21036366	SRR16288974	LA0356	FAM004625		Bern	Uppsala		YES	YES	YES	18.03	Male	B1
LABR000003	Labrador Retriever	Breed_Dogs	SAMN21036367	SRR16288973	LA0504	FAM004626		Bern	Uppsala		YES	YES	YES	19.26	Female	B1
LABR000004	Labrador Retriever	Breed_Dogs	SAMN21036368	SRR16288972	LA1257	FAM004627		Bern	Uppsala		YES	YES	YES	18.02	Male	A1
LABR000005	Labrador Retriever	Breed_Dogs	SAMN21036369	SRR16288971	LA1532	FAM004628		Bern	Uppsala		YES	YES	YES	20.87	Female	A1
LABR000006	Labrador Retriever	Breed_Dogs	SAMN21036370	SRR16288970	LA2209	FAM004629		Bern	Uppsala		YES	YES	YES	17.51	Female	A1
LAEK000001	Belgian Laekenois	Breed_Dogs	SAMN15625892	SRR12330289	FAM007313	34575		NHGRI	Uppsala		YES	YES	YES	16.36	Female	B1
LAEK000002	Belgian Laekenois	Breed_Dogs	SAMN21036377	SRR15734645	CRR033512	MA285	FAM005609	Bern	Bern	sample swap fixed	YES	YES	YES	19.99	Female	B1
LAEK000003	Belgian Laekenois	Breed_Dogs	SAMN21036376	SRR15734647	MA284	FAM005608		Bern	Bern		YES	YES	YES	18.45	Female	B1
LAEK000004	Belgian Laekenois	Breed_Dogs	SAMN20151398	SRR15100181	BPL021	FAM005246		Helsinki	Helsinki		YES	YES	YES	21.69	Female	A1
LAEK000005	Belgian Laekenois	Breed_Dogs	SAMN20151399	SRR15100180	BPL030	FAM005247		Helsinki	Helsinki		YES	YES	YES	19.06	Female	A1
LAGO000001	Lagotto Romagnolo	Breed_Dogs	SAMN15625893	SRR12330288	FAM007157	31299		NHGRI	Michigan		YES	YES	YES	18.43	Male	A1
LAGO000002	Lagotto Romagnolo	Breed_Dogs	SAMN15625894	SRR12330287	FAM007158	31603		NHGRI	Michigan		YES	YES	YES	16.68	Male	A1
LAGO000003	Lagotto Romagnolo	Breed_Dogs	SAMN15625895	SRR12330286	FAM007161	31956		NHGRI	Michigan		NO	NO	NO	18.71	Female	NotApplicable
LAGO000004	Lagotto Romagnolo	Breed_Dogs	SAMN15625896	SRR12330285	FAM007169	33195		NHGRI	Michigan		YES	YES	YES	19.66	Female	A1
LAKE000001	Lakeland Terrier	Breed_Dogs	SAMN21035244	SRR16048848	LT007A1	FAM005681		Helsinki	Helsinki		YES	YES	YES	21.06	Female	A1
LAKE000002	Lakeland Terrier	Breed_Dogs	SAMN21035245	SRR16048846	LT013A1	FAM005682		Helsinki	Helsinki		YES	YES	YES	20.44	Male	A1
LAKE000003	Lakeland Terrier	Breed_Dogs	SAMN21035246	SRR16048845	LT020A1	FAM005683		Helsinki	Helsinki		YES	YES	YES	19.39	Male	B1
LAKE000004	Lakeland Terrier	Breed_Dogs	SAMN21035247	SRR16048844	LT021A1	FAM005684		Helsinki	Helsinki		YES	YES	YES	18.08	Female	A1
LAKE000005	Lakeland Terrier	Breed_Dogs	SAMN21035248	SRR16048843	LT025A1	FAM005685		Helsinki	Helsinki		YES	YES	YES	20.91	Male	A1
LAKE000006	Lakeland Terrier	Breed_Dogs	SAMN21035249	SRR16048842	LT026A1	FAM005686		Helsinki	Helsinki		YES	YES	YES	19.81	Female	A1
LANC000001	Lancashire Heeler	Breed_Dogs	SAMN15626062	SRR12330102	FAM007365	5375		NHGRI	Uppsala		YES	YES	YES	18.34	Male	A1
LANC000002	Lancashire Heeler	Breed_Dogs	SAMN15626063	SRR12330101	FAM007366	5378		NHGRI	Uppsala		YES	YES	YES	17.31	Female	A1
LANC000003	Lancashire Heeler	Breed_Dogs	SAMN15626064	SRR12330100	FAM007367	33512		NHGRI	Uppsala		YES	YES	YES	20.38	Male	A1
LANC000004	Lancashire Heeler	Breed_Dogs	SAMN21035250	SRR16048841	LH076A1	FAM005669		Helsinki	Helsinki		YES	YES	YES	18.99	Female	A1
LANC000005	Lancashire Heeler	Breed_Dogs	SAMN21035251	SRR16048839	LH208A1	FAM005670		Helsinki	Helsinki		YES	YES	YES	21.33	Male	A1
LANC000006	Lancashire Heeler	Breed_Dogs	SAMN21035252	SRR16048838	LH211A1	FAM005671		Helsinki	Helsinki		YES	YES	YES	19.53	Male	A1
LDSR000001	Landseer	Breed_Dogs	SAMN21036371	SRR15734652	LN038	FAM005499		Bern	Bern		YES	YES	YES	17.25	Male	A1
LDSR000002	Landseer	Breed_Dogs	SAMN21036372	SRR15734651	LN071	FAM005604		Bern	Bern		YES	YES	YES	18.24	Female	A1
LDSR000003	Landseer	Breed_Dogs	SAMN21035253	SRR16048837	LDR084A1	FAM005666		Helsinki	Helsinki		YES	YES	YES	18.86	Male	A1
LDSR000004	Landseer	Breed_Dogs	SAMN19522875	SRR14750461	FAM006555	2-ADN6358		Rennes	Michigan		YES	YES	YES	21.45	Male	A1
LEON000001	Leonberger	Breed_Dogs	SAMN15625897	SRR12330284	FAM007211	20043		NHGRI	Michigan		YES	YES	YES	19.93	Female	A1
LEON000002	Leonberger	Breed_Dogs	SAMN15625898	SRR12330283	FAM007212	20044		NHGRI	Michigan		NO	NO	NO	19.63	Female	NotApplicable
LEON000003	Leonberger	Breed_Dogs	SAMN29845214	SRR20326571	FAM007444	4864		Cornell	Uppsala		YES	YES	YES	18.6	Male	A1
LEON000004	Leonberger	Breed_Dogs	SAMN29845215	SRR20326559	FAM007445	19411		Cornell	Uppsala		YES	YES	YES	18.62	Male	A1
LEON000007	Leonberger	Breed_Dogs	SAMN21035254	SRR16048836	LEO513A1	FAM005667		Helsinki	Helsinki		YES	YES	YES	17.44	Female	A1
LEON000008	Leonberger	Breed_Dogs	SAMN21035255	SRR16048835	LEO516A1	FAM005668		Helsinki	Helsinki		YES	YES	YES	18.3	Female	A1
LEON000009	Leonberger	Breed_Dogs	SAMN21035256	SRR16048834	LEO451K1P2	FAM006651		Helsinki	Helsinki		YES	YES	YES	20.67	Male	A1
LEON000010	Leonberger	Breed_Dogs	SAMN21035257	SRR16048833	Leo454K1P2	FAM006652		Helsinki	Helsinki		YES	YES	YES	17.3	Female	A1
LEON000011	Leonberger	Breed_Dogs	SAMN19522876	SRR14750462	FAM005946	2-ADN12769		Rennes	Michigan		YES	YES	YES	17.84	Male	A1
LEON000012	Leonberger	Breed_Dogs	SAMN19522877	SRR14750463	FAM006557	2-ADN6517		Rennes	Michigan		YES	YES	YES	18.46	Male	A1
LEON000013	Leonberger	Breed_Dogs	SAMN21036535	SRR15734715	FAM005602	LB0955		Bern	Bern		YES	YES	YES	18.83	Male	A1
LEON000014	Leonberger	Breed_Dogs	SAMN21036536	SRR15734714	FAM005603	LB0958		Bern	Bern		YES	YES	YES	16.66	Female	A1
LEOP000002	Catahoula Leopard Dog	Breed_Dogs	SAMN15625899	SRR12330282	FAM007330	10792		NHGRI	Uppsala		YES	YES	YES	16.96	Female	B1
LEOP000003	Catahoula Leopard Dog	Breed_Dogs	SAMN15625900	SRR12330281	FAM007331	31598		NHGRI	Uppsala		YES	YES	YES	17.04	Male	A1
LEOP000004	Catahoula Leopard Dog	Breed_Dogs	SAMN15625901	SRR12330279	FAM007332	33136		NHGRI	Uppsala		YES	YES	YES	16.37	Female	A1
LEOP000005	Catahoula Leopard Dog	Breed_Dogs	SAMN15625902	SRR12330278	FAM007266	33137		NHGRI	Michigan		YES	YES	YES	18.83	Female	A1
LEOP000007	Catahoula Leopard Dog	Breed_Dogs	SAMN15625903	SRR12330277	FAM007333	33138		NHGRI	Uppsala		NO	NO	NO	16.52	Male	NotApplicable
LEOP000008	Catahoula Leopard Dog	Breed_Dogs	SAMN15625904	SRR12330276	FAM007268	33139		NHGRI	Michigan		YES	YES	YES	20.03	Female	A1
LEOP000009	Catahoula Leopard Dog	Breed_Dogs	SAMN15625905	SRR12330275	FAM007273	33152		NHGRI	Michigan		YES	YES	YES	16.78	Male	B1
LEOP000010	Catahoula Leopard Dog	Breed_Dogs	SAMN15625906	SRR12330274	FAM007281	33321		NHGRI	Michigan		YES	YES	YES	17.84	Male	B1
LHSA000001	Lhasa Apso	Breed_Dogs	SAMN15625907	SRR12330273	FAM007051	6220		NHGRI	Michigan		YES	YES	YES	18.64	Male	A1
LHSA000002	Lhasa Apso	Breed_Dogs	SAMN15625908	SRR12330272	FAM007100	20104		NHGRI	Michigan		YES	YES	YES	18.29	Male	A1
LHSA000003	Lhasa Apso	Breed_Dogs	SAMN15625909	SRR12330271	FAM007225	26983		NHGRI	Michigan		YES	YES	YES	17.71	Female	A1
LHSA000004	Lhasa Apso	Breed_Dogs	SAMN21035258	SRR16048832	LAP040A1	FAM006753		Helsinki	Helsinki		YES	YES	YES	18.44	Female	A1
LHSA000005	Lhasa Apso	Breed_Dogs	SAMN21035259	SRR16048831	LAP043A1	FAM006754		Helsinki	Helsinki		YES	YES	YES	17.59	Male	A1
LHSA000006	Lhasa Apso	Breed_Dogs	SAMN21035260	SRR16048830	LAP044A1	FAM006755		Helsinki	Helsinki		YES	YES	YES	21.99	Female	A1
LHSA000007	Lhasa Apso	Breed_Dogs	SAMN21035261	SRR16048828	LAP045A1	FAM006756		Helsinki	Helsinki		YES	YES	YES	20.96	Male	A1
LHSA000008	Lhasa Apso	Breed_Dogs	SAMN21035262	SRR16048827	LAP047A1	FAM006757		Helsinki	Helsinki		YES	YES	YES	23.73	Male	A1
LMUN000001	Large Munsterlander	Breed_Dogs	SAMN21036312	SRR15734736	GM001	FAM005416		Bern	Bern		YES	YES	YES	18.78	Female	A1
LOWC000001	Lowchen	Breed_Dogs	SAMN21035263	SRR16048826	LOW066A1	FAM005677		Helsinki	Helsinki		YES	YES	YES	18.16	Female	B1
LOWC000002	Lowchen	Breed_Dogs	SAMN21035264	SRR16048825	LOW092A1	FAM005678		Helsinki	Helsinki		YES	YES	YES	18.85	Female	B1
LOWC000003	Lowchen	Breed_Dogs	SAMN21035265	SRR16048824	LOW099A1	FAM005679		Helsinki	Helsinki		YES	YES	YES	19.65	Male	B1
LOWC000004	Lowchen	Breed_Dogs	SAMN21035266	SRR16048823	LOW101A1	FAM005680		Helsinki	Helsinki		YES	YES	YES	18.24	Male	B1
MAAG000001	Magyar Agar	Breed_Dogs	SAMN21035267	SRR16048822	UVK004A1	FAM005849		Helsinki	Helsinki		YES	YES	YES	17.85	Male	C2
MAAG000002	Magyar Agar	Breed_Dogs	SAMN21035268	SRR16048821	UVK009A1	FAM005850		Helsinki	Helsinki		YES	YES	YES	22.51	Male	C2
MAAG000003	Magyar Agar	Breed_Dogs	SAMN21035269	SRR16048820	UVK018A1	FAM005851		Helsinki	Helsinki		YES	YES	YES	17.65	Female	C2
MAAG000004	Magyar Agar	Breed_Dogs	SAMN21035270	SRR16048797	UVK025A1	FAM005852		Helsinki	Helsinki		YES	YES	YES	17.7	Male	C2
MAAG000005	Magyar Agar	Breed_Dogs	SAMN21035271	SRR16048794	UVK027A1	FAM005853		Helsinki	Helsinki		YES	YES	YES	18.02	Male	A1
MAAG000006	Magyar Agar	Breed_Dogs	SAMN21035272	SRR16048793	UVK033A1	FAM005854		Helsinki	Helsinki		YES	YES	YES	21.22	Male	A1
MALT000001	Maltese	Breed_Dogs	SAMN15625910	SRR12330270	FAM007177	1257		NHGRI	Michigan		YES	YES	YES	23.24	Female	A1
MALT000002	Maltese	Breed_Dogs	SAMN21036233	SRR15734693	BM001	FAM005395		Bern	Bern		YES	YES	YES	18.08	Female	B1
MALT000003	Maltese	Breed_Dogs	SAMN21036234	SRR15734692	BM002	FAM005396		Bern	Bern		YES	YES	YES	17.94	Female	B1
MALT000004	Maltese	Breed_Dogs	SAMN21035273	SRR16048792	MAK002A1	FAM005687		Helsinki	Helsinki		YES	YES	YES	18.23	Male	A1
MALT000005	Coton de Tulear	Breed_Dogs	SAMN19522878	SRR14750464	FAM005936	2-ADN12473		Rennes	Michigan		YES	YES	YES	17.86	Female	B1
MANT000001	Manchester Terrier (Standard)	Breed_Dogs	SAMN15625911	SRR12330268	FAM007285	33437		NHGRI	Michigan		YES	YES	YES	18.18	Female	A1
MANT000002	Manchester Terrier (Standard)	Breed_Dogs	SAMN15625912	SRR12330267	FAM007288	33490		NHGRI	Michigan		YES	YES	YES	21.73	Male	A1
MANT000003	Manchester Terrier (Standard)	Breed_Dogs	SAMN15625913	SRR12330266		33491		NHGRI	Michigan		YES	YES	YES	18.04	Female	A1
MANT000004	Manchester Terrier (Standard)	Breed_Dogs	SAMN15626074	SRR12330089	FAM007368	33492		NHGRI	Uppsala		YES	YES	YES	16.76	Female	A1
MANT000005	Manchester Terrier (Standard)	Breed_Dogs	SAMN15626075	SRR12330088	FAM007369	33518		NHGRI	Uppsala		YES	YES	YES	20.75	Male	A1
MANT000006	Manchester Terrier (Standard)	Breed_Dogs	SAMN15626076	SRR12330087	FAM007370	33540		NHGRI	Uppsala		YES	YES	YES	18.35	Female	A1
MANT000007	Manchester Terrier (Standard)	Breed_Dogs	SAMN21035274	SRR16048791	MAT010A1	FAM005694		Helsinki	Helsinki		YES	YES	YES	17.94	Male	B1
MANT000008	Manchester Terrier (Standard)	Breed_Dogs	SAMN21035275	SRR16048790	MAT033A1	FAM005695		Helsinki	Helsinki		YES	YES	YES	18.86	Female	B1
MANT000009	Manchester Terrier (Standard)	Breed_Dogs	SAMN23802765	SRR17179517	FAM005424	MT001		Bern	Bern		YES	YES	YES	19.68	Female	A1
MARM000001	Maremma Sheepdog	Breed_Dogs	SAMN21036381	SRR15734898	MR001	FAM005503		Bern	Bern		YES	YES	YES	20.57	Male	B1
MARM000002	Maremma Sheepdog	Breed_Dogs	SAMN21036382	SRR15734873	MR009	FAM005504		Bern	Bern		YES	YES	YES	18.56	Female	A1
MARM000003	Maremma Sheepdog	Breed_Dogs	SAMN21036383	SRR15734872	MR025	FAM005505		Bern	Bern		YES	YES	YES	18.91	Male	A1
MARM000004	Maremma Sheepdog	Breed_Dogs	SAMN21035276	SRR16048789	MAR002A2	FAM005688		Helsinki	Helsinki		YES	YES	YES	19.05	Male	A1
MARM000005	Maremma Sheepdog	Breed_Dogs	SAMN21035277	SRR16048788	MAR004A1	FAM005689		Helsinki	Helsinki		YES	YES	YES	20.43	Female	A1
MARM000006	Maremma Sheepdog	Breed_Dogs	SAMN21035278	SRR16048787	MAR005A1	FAM005690		Helsinki	Helsinki		YES	YES	YES	20.96	Female	B1
MAST000001	Mastiff	Breed_Dogs	SAMN15625914	SRR12330265	FAM007371	24151		NHGRI	Uppsala		YES	YES	YES	17.05	Male	A1
MAST000002	Mastiff	Breed_Dogs	SAMN15625915	SRR12330264	FAM007372	30097		NHGRI	Uppsala		YES	YES	YES	17.05	Male	A1
MAST000003	Mastiff	Breed_Dogs	SAMN21035279	SRR16048786	MAS010A1	FAM005691		Helsinki	Helsinki		YES	YES	YES	18.63	Female	A1
MAST000004	Mastiff	Breed_Dogs	SAMN21035280	SRR16048785	MAS011A1	FAM005692		Helsinki	Helsinki		YES	YES	YES	19.48	Female	A1
MAST000005	Mastiff	Breed_Dogs	SAMN21035281	SRR16048783	MAS012A1	FAM005693		Helsinki	Helsinki		YES	YES	YES	18.57	Male	A1
MAST000006	Mastiff	Breed_Dogs	SAMN19522879	SRR14750465	FAM006570	2-ADN7910		Rennes	Michigan		YES	YES	YES	22.93	Male	A1
MBLT000001	Miniature Bull Terrier	Breed_Dogs	SAMN15625916	SRR12330263	FAM007373	11474		NHGRI	Uppsala		YES	YES	YES	16.66	Male	A1
MBLT000002	Miniature Bull Terrier	Breed_Dogs	SAMN21036378	SRR15734644	MB012	FAM005500		Bern	Bern		YES	YES	YES	18.14	Male	A1
MBLT000003	Miniature Bull Terrier	Breed_Dogs	SAMN21036379	SRR15734643	MB025	FAM005501		Bern	Bern		YES	YES	YES	17.23	Female	A1
MBLT000004	Miniature Bull Terrier	Breed_Dogs	SAMN21036380	SRR15734642	MB041	FAM005502		Bern	Bern		YES	YES	YES	17.68	Female	A1
MCUR000001	Mountain Cur	Breed_Dogs	SAMN15625917	SRR12330262	FAM007376	9321		NHGRI	Uppsala		YES	YES	YES	17.9	Male	A1
MCUR000002	Mountain Cur	Breed_Dogs	SAMN15625918	SRR12330261	FAM007377	33066		NHGRI	Uppsala		NO	NO	NO	17.78	Female	NotApplicable
MCUR000003	Mountain Cur	Breed_Dogs	SAMN15625919	SRR12330260	FAM007378	33173		NHGRI	Uppsala		NO	NO	NO	10.46	Female	NotApplicable
MCUR000004	Mountain Cur	Breed_Dogs	SAMN15625920	SRR12330259	FAM007379	33312		NHGRI	Uppsala		YES	YES	YES	16.26	Female	B1
MJMA000001	Majorca Mastiff	Breed_Dogs	SAMN21035282	SRR16048782	MAD001A3	FAM006758		Helsinki	Helsinki		YES	YES	YES	19.71	Female	A1
MJMA000002	Majorca Mastiff	Breed_Dogs	SAMN21035283	SRR16048781	MAD002A1	FAM006759		Helsinki	Helsinki		YES	YES	YES	18.28	Male	A1
MJMA000003	Majorca Mastiff	Breed_Dogs	SAMN21035284	SRR16048780	MAD005A1	FAM006760		Helsinki	Helsinki		YES	YES	YES	19.21	Female	B1
MOBD000001	Mongolian Bankhar Dog	Village_Dogs	SAMN29845216	SRR20326548	FAM000291	MN11		Cornell	Uppsala		YES	YES	YES	18.6	Male	A1
MOBD000002	Mongolian Bankhar Dog	Village_Dogs	SAMN29845217	SRR20326377	FAM000292	MN25		Cornell	Uppsala		NO	NO	NO	5.94	Female	NotApplicable
MOBD000003	Mongolian Bankhar Dog	Village_Dogs	SAMN29845218	SRR20326366	FAM000293	MN26		Cornell	Uppsala		NO	NO	NO	8.67	Female	NotApplicable
MOBD000004	Mongolian Bankhar Dog	Village_Dogs	SAMN29845219	SRR20326355	FAM000294	MN42		Cornell	Uppsala		YES	NO	NO	12.72	Male	NotApplicable
MOBD000005	Mongolian Bankhar Dog	Village_Dogs	SAMN29845220	SRR20326472	FAM000295	MN38		Cornell	Uppsala		NO	NO	NO	9.39	Female	NotApplicable
MPIN000001	Miniature Pinscher	Breed_Dogs	SAMN15625921	SRR12330257	FAM007374	12874		NHGRI	Uppsala		YES	YES	YES	16.32	Male	A4
MPIN000002	Miniature Pinscher	Breed_Dogs	SAMN21036440	SRR15734808	RP004	FAM005447		Bern	Bern		YES	YES	YES	17.02	Female	B1
MPIN000003	Miniature Pinscher	Breed_Dogs	SAMN21036441	SRR15734807	RP009	FAM005638		Bern	Bern		YES	YES	YES	19.4	Female	B1
MPIN000004	Miniature Pinscher	Breed_Dogs	SAMN19522880	SRR14750466	FAM006520	2-ADN4093		Rennes	Michigan		YES	YES	YES	18.44	Female	B1
MPIN000005	Pinscher	Mixed/Other	SAMN19522881	SRR14750467	FAM005934	2-ADN12394		Rennes	Michigan		YES	NO	NO	17.7	Male	NotApplicable
MPIN000006	Pinscher	Mixed/Other	SAMN19522882	SRR14750469	FAM006538	2-ADN5149		Rennes	Michigan		YES	NO	NO	18.33	Male	NotApplicable
MPIN000007	Unknown	Breed_Dogs	SAMN19522883	SRR14750470	FAM006596	2-ADN9191		Rennes	Michigan		YES	NO	NO	20.04	Female	NotApplicable
MPOO000001	Miniature Poodle	Breed_Dogs	SAMN21036430	SRR15734827	PL170	FAM005624		Bern	Bern		YES	YES	YES	18.29	Male	A1
MSNZ000001	Miniature Schnauzer	Breed_Dogs	SAMN15625922	SRR12330256	FAM007375	24692		NHGRI	Uppsala		YES	YES	YES	22.57	Female	A1
MSNZ000002	Miniature Schnauzer	Breed_Dogs	SAMN21036534	SRR15734716	ZZ005	FAM005544		Bern	Bern		YES	YES	YES	18.3	Male	A1
MSNZ000003	Miniature Schnauzer	Breed_Dogs	SAMN21035285	SRR16048779	KSN715A1	FAM005659		Helsinki	Helsinki		YES	YES	YES	18.14	Female	A1
MSNZ000004	Miniature Schnauzer	Breed_Dogs	SAMN19522884	SRR14750471	FAM005891	3-ADN0427		Rennes	Michigan		YES	YES	YES	19.77	Male	A1
MUDI000001	Mudi	Breed_Dogs	SAMN15625923	SRR12330255	FAM007271	33142		NHGRI	Michigan		YES	YES	YES	19.34	Female	A1
MUDI000002	Mudi	Breed_Dogs	SAMN15625924	SRR12330254	FAM007274	33179		NHGRI	Michigan		YES	YES	YES	20.45	Male	A1
MUDI000003	Mudi	Breed_Dogs	SAMN21036394	SRR15734866	MU028	FAM005506		Bern	Bern		YES	YES	YES	18.11	Female	A1
MUDI000004	Mudi	Breed_Dogs	SAMN21036395	SRR15734865	MU030	FAM005507		Bern	Bern		NO	NO	NO	11.91	Male	NotApplicable
MUDI000005	Mudi	Breed_Dogs	SAMN21035286	SRR16048778	MUD137B1	FAM005705		Helsinki	Helsinki		YES	YES	YES	21.87	Male	A1
MUDI000006	Mudi	Breed_Dogs	SAMN21035287	SRR16048777	MUD152A1	FAM005706		Helsinki	Helsinki		YES	YES	YES	20.1	Female	A1
NBUH000001	Norwegian Buhund	Breed_Dogs	SAMN15625925	SRR12330253	FAM007108	25380		NHGRI	Michigan		YES	YES	YES	20.41	Male	A1
NBUH000002	Norwegian Buhund	Breed_Dogs	SAMN15626066	SRR12330098	FAM007381	31794		NHGRI	Uppsala		NO	NO	NO	11.21	Female	NotApplicable
NBUH000003	Norwegian Buhund	Breed_Dogs	SAMN21035288	SRR16048776	NBH001B1	FAM005713		Helsinki	Helsinki		YES	YES	YES	20.45	Female	A1
NBUH000004	Norwegian Buhund	Breed_Dogs	SAMN21035289	SRR16048775	NBH010A1	FAM005714		Helsinki	Helsinki		YES	YES	YES	19.74	Female	B1
NBUH000005	Norwegian Buhund	Breed_Dogs	SAMN21035290	SRR16048774	NBH015A1	FAM005715		Helsinki	Helsinki		YES	YES	YES	19.53	Male	A1
NBUH000006	Norwegian Buhund	Breed_Dogs	SAMN21035291	SRR16048772	NBH037A1	FAM005716		Helsinki	Helsinki		YES	YES	YES	17.84	Male	B1
NEAP000001	Neapolitan Mastiff	Breed_Dogs	SAMN15625926	SRR12330252	FAM007217	23560		NHGRI	Michigan		YES	YES	YES	22.36	Male	A1
NEAP000002	Neapolitan Mastiff	Breed_Dogs	SAMN15625927	SRR12330251	FAM007218	23561		NHGRI	Michigan		YES	YES	YES	19.16	Male	A1
NEAP000003	Neapolitan Mastiff	Breed_Dogs	SAMN21035292	SRR16048771	NAP001A1	FAM005712		Helsinki	Helsinki		YES	YES	YES	19.96	Male	A1
NEAP000004	Neapolitan Mastiff	Breed_Dogs	SAMN19522885	SRR14750472	FAM006521	2-ADN4099		Rennes	Michigan		YES	YES	YES	17.48	Female	A1
NEAP000005	Neapolitan Mastiff	Breed_Dogs	SAMN19522886	SRR14750473	FAM006594	2-ADN9085		Rennes	Michigan		YES	YES	YES	21.66	Male	A1
NELK000001	Norwegian Elkhound	Breed_Dogs	SAMN15625928	SRR12330250	FAM007037	1011		NHGRI	Michigan		YES	YES	YES	19.37	Male	D1
NELK000002	Norwegian Elkhound	Breed_Dogs	SAMN15625929	SRR12330249	FAM007038	1012		NHGRI	Michigan		YES	YES	YES	19.05	Female	A1
NELK000003	Norwegian Elkhound	Breed_Dogs	SAMN15625930	SRR12330248	FAM007154	31276		NHGRI	Michigan		YES	YES	YES	19.94	Male	D1
NELK000004	Norwegian Elkhound	Breed_Dogs	SAMN15625931	SRR12330246	FAM007162	31968		NHGRI	Michigan		YES	YES	YES	20.59	Male	D1
NELK000005	Norwegian Elkhound	Breed_Dogs	SAMN21035293	SRR16048770	HNH018A2	FAM005348		Helsinki	Helsinki		YES	YES	YES	17.66	Male	D1
NELK000006	Norwegian Elkhound	Breed_Dogs	SAMN21035294	SRR16048769	HNH094A2	FAM005349		Helsinki	Helsinki		YES	YES	YES	18.54	Male	D1
NELK000007	Norwegian Elkhound	Breed_Dogs	SAMN21035295	SRR16048768	HNH153A2	FAM005350		Helsinki	Helsinki		YES	YES	YES	20.95	Male	D1
NEWF000001	Newfoundland	Breed_Dogs	SAMN15626065	SRR12330099	FAM007380	29395		NHGRI	Uppsala		YES	YES	YES	15.97	Male	A1
NEWF000002	Newfoundland	Breed_Dogs	SAMN15625932	SRR12330245	FAM007240	29596		NHGRI	Michigan		YES	YES	YES	18.65	Male	A1
NEWF000003	Newfoundland	Breed_Dogs	SAMN21036402	SRR15734858	NF038	FAM005614		Bern	Bern		YES	YES	YES	16.34	Female	A1
NEWF000004	Newfoundland	Breed_Dogs	SAMN21036403	SRR15734856	NF045	FAM005615		Bern	Bern		YES	YES	YES	19.49	Female	A1
NEWF000005	Newfoundland	Breed_Dogs	SAMN21035296	SRR16048767	NFK216A1	FAM005718		Helsinki	Helsinki		YES	YES	YES	18.45	Male	A1
NEWF000006	Newfoundland	Breed_Dogs	SAMN19522887	SRR14750474	FAM006531	2-ADN4467		Rennes	Michigan		YES	YES	YES	19.07	Male	A1
NLUN000001	Norwegian Lundehund	Breed_Dogs	SAMN15625933	SRR12330244	FAM007151	31115		NHGRI	Michigan		YES	YES	YES	16.12	Male	A1
NLUN000002	Norwegian Lundehund	Breed_Dogs	SAMN15625934	SRR12330243	FAM007159	31832		NHGRI	Michigan		YES	YES	YES	22.31	Female	A1
NLUN000003	Norwegian Lundehund	Breed_Dogs	SAMN15625935	SRR12330242	FAM007160	31833		NHGRI	Michigan		YES	YES	YES	19.57	Male	A1
NLUN000004	Norwegian Lundehund	Breed_Dogs	SAMN21035297	SRR16048766	LK002A1	FAM005675		Helsinki	Helsinki		YES	YES	YES	21.16	Female	A1
NLUN000005	Norwegian Lundehund	Breed_Dogs	SAMN21035298	SRR16048765	LK038A1	FAM005676		Helsinki	Helsinki		YES	YES	YES	20.66	Male	A1
NORB000001	Norrbottenspitz	Breed_Dogs	SAMN21035299	SRR16048764	POH013A2	FAM005750		Helsinki	Helsinki		YES	YES	YES	18.11	Male	A1
NORB000002	Norrbottenspitz	Breed_Dogs	SAMN21035300	SRR16048763	POH039A1	FAM005751		Helsinki	Helsinki		YES	YES	YES	19.35	Female	B1
NORB000003	Norrbottenspitz	Breed_Dogs	SAMN21035301	SRR16048761	POH051A1	FAM005752		Helsinki	Helsinki		YES	YES	YES	17.61	Female	A1
NORB000004	Norrbottenspitz	Breed_Dogs	SAMN21035302	SRR16048760	POH124A1	FAM005754		Helsinki	Helsinki		YES	YES	YES	21.2	Female	B1
NORB000005	Norrbottenspitz	Breed_Dogs	SAMN21035303	SRR16048759	POH141A1	FAM005755		Helsinki	Helsinki		YES	YES	YES	18.9	Male	B1
NORF000001	Norfolk Terrier	Breed_Dogs	SAMN15625936	SRR12330241	FAM007184	4675		NHGRI	Michigan		YES	YES	YES	21.06	Female	A1
NORF000002	Norfolk Terrier	Breed_Dogs	SAMN15625937	SRR12330240	FAM007185	5353		NHGRI	Michigan		YES	YES	YES	19.22	Male	A1
NORF000003	Norfolk Terrier	Breed_Dogs	SAMN21036404	SRR15734855	NOR008	FAM005431		Bern	Bern		YES	YES	YES	18.66	Female	A1
NORF000004	Norfolk Terrier	Breed_Dogs	SAMN21036405	SRR15734854	NOR010	FAM005432		Bern	Bern		YES	YES	YES	17.56	Male	A1
NORF000005	Norfolk Terrier	Breed_Dogs	SAMN21036406	SRR15734853	NOR013	FAM005616		Bern	Bern		YES	YES	YES	17.87	Male	A1
NORF000006	Norfolk Terrier	Breed_Dogs	SAMN21035304	SRR16048758	NFT086A1	FAM005719		Helsinki	Helsinki		YES	YES	YES	18.25	Female	A1
NORF000007	Norfolk Terrier	Breed_Dogs	SAMN21035305	SRR16048757	NFT133A1	FAM005720		Helsinki	Helsinki		YES	YES	YES	19.49	Female	A1
NOWT000001	Norwich Terrier	Breed_Dogs	SAMN15626067	SRR12330097	FAM007382	25012		NHGRI	Uppsala		YES	YES	YES	16.8	Female	B1
NOWT000002	Norwich Terrier	Breed_Dogs	SAMN15626068	SRR12330096	FAM007383	25013		NHGRI	Uppsala		YES	YES	YES	16.84	Male	B1
NOWT000003	Norwich Terrier	Breed_Dogs	SAMN21036410	SRR15734849	NW127	FAM005620		Bern	Bern		YES	YES	YES	19.65	Female	A1
NOWT000004	Norwich Terrier	Breed_Dogs	SAMN21036411	SRR15734848	NW173	FAM005621		Bern	Bern		YES	YES	YES	19.44	Male	B1
NOWT000005	Norwich Terrier	Breed_Dogs	SAMN21035306	SRR16048756	NWT008A1P	FAM005721		Helsinki	Helsinki		YES	YES	YES	20.55	Male	C2
NOWT000006	Norwich Terrier	Breed_Dogs	SAMN21035307	SRR16048755	NWT060A1	FAM005722		Helsinki	Helsinki		YES	YES	YES	19.18	Female	B1
NSDT000001	Nova Scotia Duck Tolling Retriever	Breed_Dogs	SAMN15625938	SRR12330239	FAM007089	13604		NHGRI	Michigan		YES	YES	YES	20.37	Female	C2
NSDT000002	Nova Scotia Duck Tolling Retriever	Breed_Dogs	SAMN15625939	SRR12330238	FAM007104	21992		NHGRI	Michigan		YES	YES	YES	19.08	Female	C2
NSDT000003	Nova Scotia Duck Tolling Retriever	Breed_Dogs	SAMN21036407	SRR15734852	NR003	FAM005617		Bern	Bern		YES	YES	YES	18.02	Female	C2
NSDT000004	Nova Scotia Duck Tolling Retriever	Breed_Dogs	SAMN21035308	SRR16048754	NCN909A1	FAM005717		Helsinki	Helsinki		YES	YES	YES	19.75	Male	C2
OEBD000001	Olde English Bulldogge	Breed_Dogs	SAMN21035309	SRR16048753	VEB001A1	FAM005866		Helsinki	Helsinki		YES	YES	YES	19.72	Female	C2
OEBD000002	Olde English Bulldogge	Breed_Dogs	SAMN21035310	SRR16048752	VEB002A1	FAM005867		Helsinki	Helsinki		YES	YES	YES	18.35	Female	C2
OEBD000003	Olde English Bulldogge	Breed_Dogs	SAMN21035311	SRR16048750	VEB003A1	FAM005868		Helsinki	Helsinki		YES	YES	YES	20.4	Male	C2
OLES000001	Old English Sheepdog	Breed_Dogs	SAMN15625940	SRR12330237	FAM007047	5990		NHGRI	Michigan		YES	YES	YES	19.35	Female	A1
OLES000002	Old English Sheepdog	Breed_Dogs	SAMN15625941	SRR12330235	FAM007048	6003		NHGRI	Michigan		YES	YES	YES	20.81	Male	A1
OLES000003	Old English Sheepdog	Breed_Dogs	SAMN15625942	SRR12330234	FAM007049	6014		NHGRI	Michigan		YES	YES	YES	17.98	Female	A1
OLES000004	Old English Sheepdog	Breed_Dogs	SAMN21036418	SRR15734840	OS007	FAM005434		Bern	Bern		YES	YES	YES	17.19	Female	A1
OLES000005	Old English Sheepdog	Breed_Dogs	SAMN21036419	SRR15734839	OS008	FAM005435		Bern	Bern		YES	YES	YES	17.3	Female	A1
OLES000006	Old English Sheepdog	Breed_Dogs	SAMN21035312	SRR16048749	VEL046A1	FAM005869		Helsinki	Helsinki		YES	YES	YES	19.26	Female	A1
OLES000007	Old English Sheepdog	Breed_Dogs	SAMN19522888	SRR14750475	FAM006598	2-ADN9438		Rennes	Michigan		YES	YES	YES	27.37	Male	A1
OLGS000001	Old German Shepherd	Breed_Dogs	SAMN21036185	SRR15734887	AH002	FAM005385		Bern	Bern		YES	YES	YES	19.44	Female	A1
OLGS000002	Old German Shepherd	Breed_Dogs	SAMN21036186	SRR15734876	AH003	FAM005386		Bern	Bern		YES	YES	YES	18.39	Female	A1
OLGS000003	Old German Shepherd	Breed_Dogs	SAMN21036187	SRR15734766	AH004	FAM005387		Bern	Bern		YES	YES	YES	17.14	Female	A1
OLGS000004	Old German Shepherd	Breed_Dogs	SAMN21036188	SRR15734731	AH006	FAM005388		Bern	Bern		YES	YES	YES	17.52	Male	A1
OLGS000005	Old German Shepherd	Breed_Dogs	SAMN21036190	SRR15734657	AH008	FAM005389		Bern	Bern		YES	YES	YES	18.91	Male	A1
OLGS000006	Old German Shepherd	Breed_Dogs	SAMN21036189	SRR15734720	AH007	FAM005634		Bern	Bern		YES	YES	YES	16.95	Male	B1
OTTR000001	Otterhound	Breed_Dogs	SAMN15625943	SRR12330233	FAM007109	26411		NHGRI	Michigan		YES	YES	YES	20.9	Female	B1
OTTR000002	Otterhound	Breed_Dogs	SAMN15625944	SRR12330232	FAM007110	26412		NHGRI	Michigan		YES	YES	YES	20.93	Male	B1
OTTR000003	Otterhound	Breed_Dogs	SAMN15625945	SRR12330231	FAM007111	26413		NHGRI	Michigan		YES	YES	YES	20.78	Female	B1
OTTR000004	Otterhound	Breed_Dogs	SAMN21035313	SRR16048748	SAU001A1	FAM006778		Helsinki	Helsinki		YES	YES	YES	16.56	Female	B1
OTTR000005	Otterhound	Breed_Dogs	SAMN21035314	SRR16048747	SAU056A1	FAM006779		Helsinki	Helsinki		YES	YES	YES	16.68	Female	B1
OTTR000006	Otterhound	Breed_Dogs	SAMN21035315	SRR16048746	SAU057A1	FAM006780		Helsinki	Helsinki		YES	YES	YES	19	Male	B1
OTTR000007	Otterhound	Breed_Dogs	SAMN21035316	SRR16048745	SAU058A1	FAM006781		Helsinki	Helsinki		YES	YES	YES	18.83	Female	B1
PAPI000001	Continental Toy Spaniel (Papillon)	Breed_Dogs	SAMN15625946	SRR12330230	FAM007216	22902		NHGRI	Michigan		YES	YES	YES	19.77	Male	A1
PAPI000002	Continental Toy Spaniel (Papillon)	Breed_Dogs	SAMN15625947	SRR12330229	FAM007237	27882		NHGRI	Michigan		YES	YES	YES	18.44	Male	A1
PAPI000003	Continental Toy Spaniel (Papillon)	Breed_Dogs	SAMN21036420	SRR15734838	PA021	FAM005513		Bern	Bern		YES	YES	YES	18.43	Male	A1
PAPI000004	Continental Toy Spaniel (Papillon)	Breed_Dogs	SAMN21036421	SRR15734837	PA026	FAM005514		Bern	Bern		YES	YES	YES	19.75	Female	A1
PAPI000005	Continental Toy Spaniel (Papillon)	Breed_Dogs	SAMN21035317	SRR16048744	PAP035A1	FAM005727		Helsinki	Helsinki		YES	YES	YES	22.88	Male	B1
PAPI000006	Continental Toy Spaniel (Papillon)	Breed_Dogs	SAMN21035318	SRR16048743	PAP048A1	FAM005728		Helsinki	Helsinki		YES	YES	YES	18.48	Male	A1
PARS000001	Parson Russell Terrier	Breed_Dogs	SAMN15626069	SRR12330095	FAM007384	12325		NHGRI	Uppsala		YES	YES	YES	17.06	Male	A1
PARS000002	Parson Russell Terrier	Breed_Dogs	SAMN21036433	SRR15734815	PR023	FAM005516		Bern	Bern		YES	YES	YES	18.84	Female	B1
PARS000003	Parson Russell Terrier	Breed_Dogs	SAMN21036434	SRR15734814	PR033	FAM005517		Bern	Bern		YES	YES	YES	17.93	Male	A1
PARS000004	Parson Russell Terrier	Breed_Dogs	SAMN21035319	SRR16048742	PRT242A1	FAM006809		Helsinki	Helsinki		YES	YES	YES	17.12	Female	A1
PARS000005	Parson Russell Terrier	Breed_Dogs	SAMN19522889	SRR14750476	FAM006569	2-ADN7767		Rennes	Michigan		YES	YES	YES	20.52	Female	A1
PASP000001	Pont-Audemer spaniel	Breed_Dogs	SAMN21035320	SRR16048741	POS002A1	FAM006770		Helsinki	Helsinki		YES	YES	YES	19.22	Male	B1
PASP000002	Pont-Audemer spaniel	Breed_Dogs	SAMN21035321	SRR16048735	POS006A1	FAM006771		Helsinki	Helsinki		NO	NO	NO	16.89	Female	NotApplicable
PASP000003	Pont-Audemer spaniel	Breed_Dogs	SAMN21035322	SRR16048734	POS014B1	FAM006772		Helsinki	Helsinki		YES	YES	YES	17.04	Male	B1
PASP000004	Pont-Audemer spaniel	Breed_Dogs	SAMN21035323	SRR16048733	POS016A1	FAM006773		Helsinki	Helsinki		YES	YES	YES	18.58	Male	B1
PASP000005	Pont-Audemer spaniel	Breed_Dogs	SAMN21035324	SRR16048732	POS020B1	FAM006774		Helsinki	Helsinki		YES	YES	YES	16.46	Female	B1
PASP000006	Pont-Audemer spaniel	Breed_Dogs	SAMN19522890	SRR14750325	FAM006601	3-ADN9623		Rennes	Michigan		YES	YES	YES	20.14	Female	B1
PASP000007	Pont-Audemer spaniel	Breed_Dogs	SAMN19522891	SRR14750326	FAM006602	3-ADN9624		Rennes	Michigan		YES	YES	YES	18.27	Female	B1
PATR000001	Patterdale Terrier	Breed_Dogs	SAMN21036435	SRR15734813	PT001	FAM005442		Bern	Bern		YES	YES	YES	20.41	Female	A1
PATR000002	Patterdale Terrier	Breed_Dogs	SAMN21035325	SRR16048731	PDT001A1	FAM005729		Helsinki	Helsinki		YES	YES	YES	19.08	Male	A1
PATR000003	Patterdale Terrier	Breed_Dogs	SAMN21035326	SRR16048730	PDT002A1	FAM005730		Helsinki	Helsinki		YES	YES	YES	20.39	Male	A1
PATR000004	Patterdale Terrier	Breed_Dogs	SAMN21035327	SRR16048729	PDT003A1	FAM005731		Helsinki	Helsinki		YES	YES	YES	20.07	Male	A1
PBGA000001	Petit Bleu de Gascogne	Breed_Dogs	SAMN21036311	SRR15734737	GL001	FAM005415		Bern	Bern		YES	YES	YES	21.67	Female	A1
PBGA000002	Petit Bleu de Gascogne	Breed_Dogs	SAMN19522892	SRR14750328	FAM005907	3-ADN10914		Rennes	Michigan		YES	YES	YES	20.01	Female	A1
PBGA000003	Petit Bleu de Gascogne	Breed_Dogs	SAMN19522893	SRR14750329	FAM006510	3-ADN3666		Rennes	Michigan		YES	YES	YES	18.93	Female	A1
PBGA000004	Petit Bleu de Gascogne	Breed_Dogs	SAMN19522894	SRR14750330	FAM006600	3-ADN9537		Rennes	Michigan		YES	YES	YES	19.54	Female	A1
PBGR000001	Brussels Griffon (smooth)	Breed_Dogs	SAMN21035328	SRR16048728	GRI010A1	FAM005344		Helsinki	Helsinki		YES	YES	YES	22.01	Male	B1
PBGR000002	Brussels Griffon (smooth)	Breed_Dogs	SAMN21035329	SRR16048727	GRI068A1	FAM005345		Helsinki	Helsinki		YES	YES	YES	20.65	Male	A1
PBGV000001	Petit Basset Griffon Vendeen	Breed_Dogs	SAMN15625948	SRR12330228	FAM007060	9402		NHGRI	Michigan		YES	YES	YES	20.45	Female	A1
PBGV000002	Petit Basset Griffon Vendeen	Breed_Dogs	SAMN15625949	SRR12330227	FAM007061	9419		NHGRI	Michigan		YES	YES	YES	18.47	Male	A1
PBGV000003	Petit Basset Griffon Vendeen	Breed_Dogs	SAMN15625950	SRR12330226	FAM007074	12353		NHGRI	Michigan		YES	YES	YES	18.93	Male	A1
PBGV000004	Petit Basset Griffon Vendeen	Breed_Dogs	SAMN20151378	SRR15100203	BGV015	FAM005226		Helsinki	Helsinki		YES	YES	YES	20.78	Male	A1
PBGV000005	Petit Basset Griffon Vendeen	Breed_Dogs	SAMN20151379	SRR15100202	BGV034	FAM005227		Helsinki	Helsinki		YES	YES	YES	21.91	Female	A1
PBGV000006	Petit Basset Griffon Vendeen	Breed_Dogs	SAMN20151381	SRR15100200	BGV056	FAM005229		Helsinki	Helsinki		YES	YES	YES	21.06	Male	A1
PBGV000007	Petit Basset Griffon Vendeen	Breed_Dogs	SAMN20151382	SRR15100199	BGV228	FAM005230		Helsinki	Helsinki		YES	YES	YES	22.79	Male	A1
PBGV000008	Petit Basset Griffon Vendeen	Breed_Dogs	SAMN20151383	SRR15100197	BGV262	FAM005231		Helsinki	Helsinki		YES	YES	YES	23.43	Female	B1
PBGV000009	Petit Basset Griffon Vendeen	Breed_Dogs	SAMN15626077	SRR12330086	FAM007385	11478		NHGRI	Uppsala		YES	YES	YES	17.29	Male	A1
PBGV000010	Petit Basset Griffon Vendeen	Breed_Dogs	SAMN21036425	SRR15734832	PG001	FAM005438		Bern	Bern		YES	YES	YES	19.01	Male	A1
PBGV000011	Unknown	Breed_Dogs	SAMN19522895	SRR14750331	FAM006611	3-ADNPR3684		Rennes	Michigan		YES	NO	NO	18.27	Female	NotApplicable
PBGV000012	Petit Basset Griffon Vendeen	Breed_Dogs	SAMN19522896	SRR14750332	FAM006613	3-ADNPR3911_2		Rennes	Michigan		YES	YES	YES	21.71	Female	A1
PEKE000001	Pekingese	Breed_Dogs	SAMN21035330	SRR16048726	KIK009A1	FAM005649		Helsinki	Helsinki		YES	YES	YES	19.48	Female	B1
PEKE000002	Pekingese	Breed_Dogs	SAMN21035331	SRR16048724	KIK010A1	FAM005650		Helsinki	Helsinki		YES	YES	YES	19.98	Female	C2
PEKE000003	Pekingese	Breed_Dogs	SAMN21035332	SRR16048723	KIK011A1	FAM005651		Helsinki	Helsinki		YES	YES	YES	19.87	Male	B1
PEMB000001	Pembroke Welsh Corgi	Breed_Dogs	SAMN19522897	SRR14750333	FAM005923	3-ADN11817		Rennes	Michigan		YES	YES	YES	20.54	Female	A1
PERH000001	Peruvian Hairless	Breed_Dogs	SAMN21036426	SRR15734831	PH001	FAM005439		Bern	Bern		YES	YES	YES	19.76	Male	C1
PERH000002	Peruvian Hairless	Breed_Dogs	SAMN21036427	SRR15734830	PH009	FAM005440		Bern	Bern		YES	YES	YES	16.99	Female	A1
PERH000003	Peruvian Hairless	Breed_Dogs	SAMN21036428	SRR15734829	PH010	FAM005441		Bern	Bern		YES	YES	YES	18.18	Female	A1
PERH000004	Peruvian Hairless	Breed_Dogs	SAMN21035333	SRR16048722	PKI032A1	FAM005739		Helsinki	Helsinki		YES	YES	YES	18.07	Male	C1
PERH000005	Peruvian Hairless	Breed_Dogs	SAMN21035334	SRR16048721	PKK119A1P	FAM005740		Helsinki	Helsinki		YES	YES	YES	19.01	Female	A1
PHAL000001	Continental Toy Spaniel (Phalene)	Breed_Dogs	SAMN21035335	SRR16048720	PHA060A1	FAM005733		Helsinki	Helsinki		YES	YES	YES	18.29	Male	A1
PHAL000002	Continental Toy Spaniel (Phalene)	Breed_Dogs	SAMN21035336	SRR16048719	PHA061A1	FAM005734		Helsinki	Helsinki		YES	YES	YES	17.47	Female	A1
PHAL000003	Continental Toy Spaniel (Phalene)	Breed_Dogs	SAMN21035337	SRR16048718	PHA082A1	FAM005735		Helsinki	Helsinki		YES	YES	YES	18.93	Male	A1
PHAL000004	Continental Toy Spaniel (Phalene)	Breed_Dogs	SAMN21035338	SRR16048717	PHA092A1	FAM005736		Helsinki	Helsinki		YES	YES	YES	21.41	Female	B1
PHAL000005	Continental Toy Spaniel (Phalene)	Breed_Dogs	SAMN21035339	SRR16048716	PHA041A2	FAM006813		Helsinki	Helsinki		YES	YES	YES	21.87	Male	A1
PHAR000001	Pharaoh Hound	Breed_Dogs	SAMN15625951	SRR12330224	FAM007120	27778		NHGRI	Michigan		YES	YES	YES	17.8	Female	A1
PHAR000002	Pharaoh Hound	Breed_Dogs	SAMN15625952	SRR12330223	FAM007121	27788		NHGRI	Michigan		YES	YES	YES	19.29	Female	A1
PHAR000003	Pharaoh Hound	Breed_Dogs	SAMN15625953	SRR12330222	FAM007122	27789		NHGRI	Michigan		YES	YES	YES	18.69	Female	A1
PHAR000004	Pharaoh Hound	Breed_Dogs	SAMN20151492	SRR15100226	FK041A1	FAM005340		Helsinki	Helsinki		YES	YES	YES	18.23	Female	A1
PHAR000005	Pharaoh Hound	Breed_Dogs	SAMN21035340	SRR16048715	FK065A1	FAM005341		Helsinki	Helsinki		YES	YES	YES	19.92	Male	A1
PHAR000006	Pharaoh Hound	Breed_Dogs	SAMN21035341	SRR16048712	FK069A1	FAM005342		Helsinki	Helsinki		YES	YES	YES	20.98	Male	A1
PISH000001	Picardy Shepherd	Breed_Dogs	SAMN19522898	SRR14750334	FAM005893	2-ADN10095		Rennes	Michigan		YES	YES	YES	18.67	Female	C1
PISH000002	Picardy Shepherd	Breed_Dogs	SAMN19522899	SRR14750335	FAM006500	2-ADN3174		Rennes	Michigan		YES	YES	YES	18.36	Male	C1
PISH000003	Picardy Shepherd	Breed_Dogs	SAMN19522900	SRR14750336	FAM006501	2-ADN3183		Rennes	Michigan		YES	YES	YES	17.89	Female	C1
PISH000004	Picardy Shepherd	Breed_Dogs	SAMN19522901	SRR14750337	FAM006564	2-ADN7453		Rennes	Michigan		YES	YES	YES	20.02	Female	C1
PISH000005	Picardy Shepherd	Breed_Dogs	SAMN19522902	SRR14750339	FAM006590	2-ADN8962		Rennes	Michigan		YES	YES	YES	20.03	Female	C1
PISH000006	Picardy Shepherd	Breed_Dogs	SAMN19522903	SRR14750340	FAM006604	2-ADN9777		Rennes	Michigan		YES	YES	YES	19.22	Female	C1
PISP000001	Picardy Spaniel	Breed_Dogs	SAMN19522904	SRR14750341	FAM005900	3-ADN10670		Rennes	Michigan		YES	YES	YES	17.83	Female	A1
PISP000002	Picardy Spaniel	Breed_Dogs	SAMN19522905	SRR14750342	FAM006548	3-ADN618		Rennes	Michigan		YES	YES	YES	18.48	Male	A1
PISP000003	Picardy Spaniel	Breed_Dogs	SAMN19522906	SRR14750343	FAM006605	3-ADN9923		Rennes	Michigan		YES	YES	YES	19.93	Male	A1
PISP000004	Picardy Spaniel	Breed_Dogs	SAMN19522907	SRR14750344	FAM006606	3-ADN9924		Rennes	Michigan		YES	YES	YES	20.49	Male	A1
PITB000001	Pit Bull Terrier	Mixed/Other	SAMN21035342	SRR16048711	PIT001A1	FAM006761		Helsinki	Helsinki		YES	YES	YES	21.11	Female	A1
PITB000002	Pit Bull Terrier	Mixed/Other	SAMN21035343	SRR16048710	PIT002A1	FAM006762		Helsinki	Helsinki		YES	YES	YES	19.97	Male	A1
PLOT000001	Plott Hound	Breed_Dogs	SAMN21035344	SRR16048709	POK002A1	FAM005759		Helsinki	Helsinki		YES	YES	YES	18	Female	A1
POLG000001	Polish Greyhound	Breed_Dogs	SAMN21035345	SRR16048708	POL024A1	FAM006763		Helsinki	Helsinki		YES	YES	YES	18.64	Female	A1
POLG000002	Polish Greyhound	Breed_Dogs	SAMN21035346	SRR16048707	POL027A1	FAM006764		Helsinki	Helsinki		YES	YES	YES	17.57	Male	A1
POLG000003	Polish Greyhound	Breed_Dogs	SAMN21035347	SRR16048706	POL034A1	FAM006765		Helsinki	Helsinki		YES	YES	YES	20.7	Male	A1
POLG000004	Polish Greyhound	Breed_Dogs	SAMN21035348	SRR16048705	POL036A1	FAM006766		Helsinki	Helsinki		YES	YES	YES	19.81	Male	A1
POLG000005	Polish Greyhound	Breed_Dogs	SAMN21035349	SRR16048704	POL037B1	FAM006767		Helsinki	Helsinki		YES	YES	YES	18.53	Male	A1
POLG000006	Polish Greyhound	Breed_Dogs	SAMN21035350	SRR16048703	POL044A1	FAM006768		Helsinki	Helsinki		YES	YES	YES	19.23	Male	A1
POLG000007	Polish Greyhound	Breed_Dogs	SAMN21035351	SRR16048701	POL046A1	FAM006769		Helsinki	Helsinki		YES	YES	YES	17.19	Female	A1
POLS000001	Polish Lowland Sheepdog	Breed_Dogs	SAMN21036431	SRR15734826	PO038	FAM005515		Bern	Bern		YES	YES	YES	18.63	Male	A1
POLS000002	Polish Lowland Sheepdog	Breed_Dogs	SAMN21036432	SRR15734817	PO048	FAM005625		Bern	Bern		YES	YES	YES	20.23	Female	A1
POLS000003	Polish Tatra Sheepdog	Breed_Dogs	SAMN19522908	SRR14750345	FAM005963	2-ADN13813		Rennes	Michigan		YES	YES	YES	19.08	Female	A1
POLS000004	Polish Tatra Sheepdog	Breed_Dogs	SAMN19522909	SRR14750346	FAM005964	2-ADN13818		Rennes	Michigan		YES	YES	YES	20.62	Male	A1
POMR000001	Pomeranian	Breed_Dogs	SAMN15626073	SRR12330090	FAM007389	8521		NHGRI	Uppsala		NO	NO	NO	9.34	Male	NotApplicable
POMR000002	Pomeranian	Breed_Dogs	SAMN21035352	SRR16048700	POM012A1	FAM005760		Helsinki	Helsinki		YES	YES	YES	18.96	Male	C2
POMR000003	Pomeranian	Breed_Dogs	SAMN21036528	SRR16288928	ZS096	FAM004582		Bern	Uppsala		YES	YES	YES	16.56	Male	C2
POMR000004	Pomeranian	Breed_Dogs	SAMN21036529	SRR16288927	ZS098	FAM004583		Bern	Uppsala		YES	YES	YES	18.14	Female	C2
POMR000005	Pomeranian	Breed_Dogs	SAMN21036530	SRR16288926	ZS227	FAM004584		Bern	Uppsala		YES	YES	YES	18.64	Male	B1
POMR000006	Pomeranian	Breed_Dogs	SAMN21036531	SRR16288925	ZS228	FAM004585		Bern	Uppsala		YES	YES	YES	17.61	Female	C2
POMR000007	Pomeranian	Breed_Dogs	SAMN21036532	SRR16289023	ZS254	FAM004586		Bern	Uppsala		YES	YES	YES	20.19	Female	A1
POMR000008	Pomeranian	Breed_Dogs	SAMN21036533	SRR16289022	ZS358	FAM004587		Bern	Uppsala		YES	YES	YES	17.52	Female	B1
POOD000001	Poodle	Breed_Dogs	SAMN21035353	SRR16048699	TOY289A1	FAM005837		Helsinki	Helsinki		YES	YES	YES	20.06	Female	A1
POPT000001	Portuguese Pointer	Breed_Dogs	SAMN21035354	SRR16048698	PS001A1	FAM005771		Helsinki	Helsinki		YES	YES	YES	19.08	Female	A1
PORC000001	Porcelaine	Breed_Dogs	SAMN21035355	SRR16048697	POR001A1	FAM005761		Helsinki	Helsinki		YES	YES	YES	18.56	Male	A1
POSD000001	Portuguese Sheepdog	Breed_Dogs	SAMN21036271	SRR15734891	CS001	FAM005486		Bern	Bern		YES	YES	YES	17.81	Female	B1
POSD000002	Portuguese Sheepdog	Breed_Dogs	SAMN21036272	SRR15734890	CS003	FAM005487		Bern	Bern		YES	YES	YES	18.1	Female	A1
POSD000003	Portuguese Sheepdog	Breed_Dogs	SAMN21036273	SRR15734889	CS010	FAM005488		Bern	Bern		YES	YES	YES	18.06	Male	A1
POSD000004	Portuguese Sheepdog	Breed_Dogs	SAMN21035356	SRR16048696	SDA013A2	FAM005806		Helsinki	Helsinki		YES	YES	YES	18.53	Female	A1
POSD000005	Portuguese Sheepdog	Breed_Dogs	SAMN21035357	SRR16048695	SDA115A1	FAM005807		Helsinki	Helsinki		YES	YES	YES	18.29	Male	A1
POSD000006	Portuguese Sheepdog	Breed_Dogs	SAMN21035358	SRR16048694	SDA120A1	FAM005808		Helsinki	Helsinki		YES	YES	YES	17.84	Male	A1
POSH000001	Posavac Hound	Breed_Dogs	SAMN21035359	SRR16048693	PAK001A1	FAM005726		Helsinki	Helsinki		YES	YES	YES	18.47	Male	A1
PPOD000001	Portuguese Podengo	Breed_Dogs	SAMN21035360	SRR16048692	PPK020A1	FAM005762		Helsinki	Helsinki		YES	YES	YES	18.19	Female	B1
PPOD000002	Portuguese Podengo	Breed_Dogs	SAMN21035361	SRR16048690	PPK087A1	FAM005763		Helsinki	Helsinki		YES	YES	YES	17.49	Male	C2
PPOD000003	Portuguese Podengo Pequeno	Breed_Dogs	SAMN21035362	SRR16048689	PPK113A1	FAM005764		Helsinki	Helsinki		YES	YES	YES	17.55	Male	B1
PPOD000004	Portuguese Podengo Pequeno	Breed_Dogs	SAMN21035363	SRR16048688	PPK128A1	FAM005765		Helsinki	Helsinki		YES	YES	YES	19.25	Female	A1
PPOP000001	Portuguese Podengo Pequeno	Breed_Dogs	SAMN15625954	SRR12330221	FAM007173	33229		NHGRI	Michigan		YES	YES	YES	18.52	Male	A1
PPOP000002	Portuguese Podengo Pequeno	Breed_Dogs	SAMN15625955	SRR12330220	FAM007390	34432		NHGRI	Uppsala		YES	YES	YES	14.91	Male	A1
PRKR000001	Prague Ratter	Breed_Dogs	SAMN21035364	SRR16048687	PRK006A1	FAM005766		Helsinki	Helsinki		YES	YES	YES	18.56	Male	A1
PRKR000002	Prague Ratter	Breed_Dogs	SAMN21035365	SRR16048686	PRK011A1	FAM005767		Helsinki	Helsinki		YES	YES	YES	19.17	Female	A1
PRKR000003	Prague Ratter	Breed_Dogs	SAMN21035366	SRR16048685	PRK013A1	FAM005768		Helsinki	Helsinki		YES	YES	YES	20.27	Male	B1
PRKR000004	Prague Ratter	Breed_Dogs	SAMN21035367	SRR16048684	PRK015A1	FAM005769		Helsinki	Helsinki		YES	YES	YES	18.58	Female	A1
PRKR000005	Prague Ratter	Breed_Dogs	SAMN21035368	SRR16048683	PRK017A1	FAM005770		Helsinki	Helsinki		YES	YES	YES	18.89	Male	A1
PTAS000001	Polish Tatra Sheepdog	Breed_Dogs	SAMN21035369	SRR16048682	OP001A1	FAM005723		Helsinki	Helsinki		YES	YES	YES	18.02	Female	B1
PTAS000002	Polish Tatra Sheepdog	Breed_Dogs	SAMN21035370	SRR16048681	OP013A1	FAM005724		Helsinki	Helsinki		YES	YES	YES	18.72	Male	A1
PTAS000003	Polish Tatra Sheepdog	Breed_Dogs	SAMN21035371	SRR16048679	OP014A3	FAM005725		Helsinki	Helsinki		YES	YES	YES	18.65	Male	A1
PTAS000004	Polish Tatra Sheepdog	Breed_Dogs	SAMN19522910	SRR14750347	FAM006508	3-ADN3504		Rennes	Michigan		YES	YES	YES	18.93	Female	A1
PTAS000005	Polish Tatra Sheepdog	Breed_Dogs	SAMN19522911	SRR14750348	FAM006519	3-ADN4051		Rennes	Michigan		YES	YES	YES	20.18	Male	A1
PTAS000006	Polish Tatra Sheepdog	Breed_Dogs	SAMN19522912	SRR14750351	FAM006573	3-ADN8024		Rennes	Michigan		YES	YES	YES	17.63	Male	A1
PTWD000001	Portuguese Water Dog	Breed_Dogs	SAMN15625956	SRR12330219	FAM007391	5834		NHGRI	Uppsala		YES	YES	YES	15.74	Female	B1
PTWD000002	Portuguese Water Dog	Breed_Dogs	SAMN15625957	SRR12330218	FAM007392	30157		NHGRI	Uppsala		YES	YES	YES	17.13	Male	B1
PTWD000003	Portuguese Water Dog	Breed_Dogs	SAMN15625958	SRR12330217	FAM007393	34618		NHGRI	Uppsala		YES	YES	YES	17.3	Male	A1
PTWD000004	Portuguese Water Dog	Breed_Dogs	SAMN21036437	SRR15734811	PW001	FAM005444		Bern	Bern		YES	YES	YES	17.74	Female	B1
PTWD000005	Portuguese Water Dog	Breed_Dogs	SAMN21036438	SRR15734810	PW002	FAM005445		Bern	Bern		YES	YES	YES	19.24	Male	A1
PTWD000006	Portuguese Water Dog	Breed_Dogs	SAMN21036439	SRR15734809	PW004	FAM005446		Bern	Bern		YES	YES	YES	18.79	Male	B1
PTWD000007	Portuguese Water Dog	Breed_Dogs	SAMN21035372	SRR16048678	PVK039A1	FAM005780		Helsinki	Helsinki		YES	YES	YES	17.13	Male	A1
PTWD000008	Portuguese Water Dog	Breed_Dogs	SAMN21035373	SRR16048677	PVK063A1	FAM005781		Helsinki	Helsinki		YES	YES	YES	20.31	Female	A1
PUDL000001	Pudelpointer	Breed_Dogs	SAMN19522913	SRR14750352	FAM006506	3-ADN3489		Rennes	Michigan		YES	YES	YES	18.21	Male	A1
PUDL000002	Pudelpointer	Breed_Dogs	SAMN19522914	SRR14750353	FAM006509	3-ADN3545		Rennes	Michigan		YES	YES	YES	17.46	Male	A1
PUDL000003	Pudelpointer	Breed_Dogs	SAMN19522915	SRR14750354	FAM006517	3-ADN4024		Rennes	Michigan		YES	YES	YES	17.76	Male	A1
PUDL000004	Unknown	Breed_Dogs	SAMN19522916	SRR14750355	FAM006609	4-ADNPR3589_1		Rennes	Michigan		YES	NO	NO	19.49	Male	NotApplicable
PUGD000001	Pug	Breed_Dogs	SAMN21035374	SRR16048676	MOP033A1	FAM005698		Helsinki	Helsinki		YES	YES	YES	19.5	Male	A1
PULI000001	Puli	Breed_Dogs	SAMN21036436	SRR15734812	PU001	FAM005443		Bern	Bern		YES	YES	YES	17.63	Male	A1
PULI000002	Puli	Breed_Dogs	SAMN21035375	SRR16048675	PUL002A1	FAM005772		Helsinki	Helsinki		YES	YES	YES	17.37	Female	A1
PULI000003	Puli	Breed_Dogs	SAMN21035376	SRR16048674	PUL031A1	FAM005773		Helsinki	Helsinki		YES	YES	YES	17.72	Male	B1
PULI000004	Puli	Breed_Dogs	SAMN21035377	SRR16048673	PUL042A1	FAM005774		Helsinki	Helsinki		YES	YES	YES	19.87	Male	A1
PULI000005	Puli	Breed_Dogs	SAMN21035378	SRR16048672	PUL049A1	FAM005775		Helsinki	Helsinki		YES	YES	YES	19.75	Female	A1
PULI000006	Puli	Breed_Dogs	SAMN21035379	SRR16048671	PUL059A1	FAM005776		Helsinki	Helsinki		YES	YES	YES	20.52	Male	A1
PUMI000001	Pumi	Breed_Dogs	SAMN15625959	SRR12330216	FAM007394	29689		NHGRI	Uppsala		YES	YES	YES	16.68	Male	A1
PUMI000002	Pumi	Breed_Dogs	SAMN15625960	SRR12330215	FAM007395	29695		NHGRI	Uppsala		YES	YES	YES	19.41	Male	B1
PUMI000003	Pumi	Breed_Dogs	SAMN15625961	SRR12330213	FAM007396	29697		NHGRI	Uppsala		YES	YES	YES	17.35	Male	A1
PUMI000004	Pumi	Breed_Dogs	SAMN21035380	SRR16048670	PUM053A1	FAM005777		Helsinki	Helsinki		YES	YES	YES	18.33	Female	A1
PUMI000005	Pumi	Breed_Dogs	SAMN21035381	SRR16048668	PUM078A1	FAM005778		Helsinki	Helsinki		YES	YES	YES	17.94	Male	A1
PUMI000006	Pumi	Breed_Dogs	SAMN21035382	SRR16048667	PUM107A1	FAM005779		Helsinki	Helsinki		YES	YES	YES	17.47	Female	A1
PYMF000001	Pyrenean Mastiff	Breed_Dogs	SAMN21035383	SRR16048666	PM021A1	FAM005744		Helsinki	Helsinki		YES	YES	YES	18.68	Female	A1
PYMF000002	Pyrenean Mastiff	Breed_Dogs	SAMN21035384	SRR16048665	PM023A1	FAM005745		Helsinki	Helsinki		YES	YES	YES	18.08	Male	A1
PYMF000003	Pyrenean Mastiff	Breed_Dogs	SAMN21035385	SRR16048664	PM030A1	FAM005746		Helsinki	Helsinki		YES	YES	YES	18.2	Male	A1
PYMF000004	Pyrenean Mastiff	Breed_Dogs	SAMN21035386	SRR16048663	PM031A1	FAM005747		Helsinki	Helsinki		YES	YES	YES	19.21	Female	A1
PYMF000005	Pyrenean Mastiff	Breed_Dogs	SAMN21035387	SRR16048662	PM103A1	FAM005748		Helsinki	Helsinki		YES	YES	YES	19.36	Female	A1
PYMF000006	Pyrenean Mastiff	Breed_Dogs	SAMN21035388	SRR16048661	PM107A1	FAM005749		Helsinki	Helsinki		YES	YES	YES	18.79	Male	A1
PYSH000001	Pyrenean Shepherd	Breed_Dogs	SAMN21036253	SRR15734678	BY004	FAM005564		Bern	Bern		YES	YES	YES	18.05	Male	A1
PYSH000002	Great Pyrenees	Breed_Dogs	SAMN21036254	SRR15734677	BY008	FAM005565		Bern	Bern		YES	YES	YES	19.55	Male	A1
PYSH000003	Pyrenean Shepherd	Breed_Dogs	SAMN21035389	SRR16048660	PYP074A2	FAM005784		Helsinki	Helsinki		YES	YES	YES	19.35	Male	A1
PYSH000004	Pyrenean Shepherd	Breed_Dogs	SAMN21035390	SRR16048659	PYP212A1	FAM005785		Helsinki	Helsinki		YES	YES	YES	19.56	Female	A1
PYSH000005	Pyrenean Shepherd	Breed_Dogs	SAMN19522917	SRR14750356	FAM006576	2-ADN8314		Rennes	Michigan		YES	YES	YES	20.23	Female	A1
PYSH000006	Pyrenean Shepherd	Breed_Dogs	SAMN19522918	SRR14750477	FAM006585	2-ADN8766		Rennes	Michigan		YES	YES	YES	19.36	Female	A1
PYSH000007	Pyrenean Shepherd	Breed_Dogs	SAMN19522919	SRR14750478	FAM005896	2-ADN10301		Rennes	Michigan		YES	YES	YES	20.55	Male	A1
PYSH000008	Pyrenean Shepherd	Breed_Dogs	SAMN19522920	SRR14750479	FAM005897	2-ADN10309		Rennes	Michigan		YES	YES	YES	18.75	Female	A1
PYSH000009	Pyrenean Shepherd	Breed_Dogs	SAMN19522921	SRR14750480	FAM005906	2-ADN10899		Rennes	Michigan		YES	YES	YES	19.7	Male	B1
PYSH000010	Pyrenean Shepherd	Breed_Dogs	SAMN19522922	SRR14750482	FAM005910	2-ADN11030		Rennes	Michigan		YES	YES	YES	17.92	Male	C1
PYSH000011	Pyrenean Shepherd	Breed_Dogs	SAMN19522923	SRR14750483	FAM005922	2-ADN11623		Rennes	Michigan		YES	YES	YES	17.58	Female	A1
PYSH000012	Pyrenean Shepherd	Breed_Dogs	SAMN19522924	SRR14750484	FAM006578	2-ADN8322		Rennes	Michigan		YES	YES	YES	19	Male	A1
RABA000002	Ratonero Bodeguero Andaluz	Breed_Dogs	SAMN20151359	SRR15100224	ART001	FAM005207		Helsinki	Helsinki		YES	YES	YES	20.12	Male	B1
RATT000001	Rat Terrier	Breed_Dogs	SAMN21035391	SRR16048657	RT001A1	FAM005787		Helsinki	Helsinki		YES	YES	YES	20.23	Female	A1
RATT000002	Rat Terrier	Breed_Dogs	SAMN21035392	SRR16048656	RT002A1	FAM005788		Helsinki	Helsinki		YES	YES	YES	20.56	Female	C2
REDB000001	Redbone Coonhound	Breed_Dogs	SAMN29845221	SRR20326461	FAM007446	7932		Cornell	Uppsala		YES	YES	YES	21.22	Female	A1
REDB000002	Redbone Coonhound	Breed_Dogs	SAMN29845222	SRR20326450	FAM007447	9834		Cornell	Uppsala		YES	YES	YES	18.73	Female	A1
REDB000003	Redbone Coonhound	Breed_Dogs	SAMN29845223	SRR20326343	FAM007448	24586		Cornell	Uppsala		YES	YES	YES	19.27	Female	B1
RHOD000001	Rhodesian Ridgeback	Breed_Dogs	SAMN15625962	SRR12330212	FAM007103	21531		NHGRI	Michigan		YES	YES	YES	19.77	Male	A1
RHOD000002	Rhodesian Ridgeback	Breed_Dogs	SAMN21036442	SRR15734806	RR318	FAM005626		Bern	Bern		YES	YES	YES	18.39	Female	B1
ROOS000001	Teddy Roosevelt Terrier	Breed_Dogs	SAMN15625963	SRR12330211	FAM007413	24735		NHGRI	Uppsala		YES	YES	YES	19.62	Male	A1
ROOS000002	Teddy Roosevelt Terrier	Breed_Dogs	SAMN15625964	SRR12330210	FAM007414	24776		NHGRI	Uppsala		YES	YES	YES	19.98	Female	A1
RTOY000001	Russian Toy	Breed_Dogs	SAMN21036444	SRR15734802	RT001	FAM005448		Bern	Bern		YES	YES	YES	18.24	Female	A1
RTOY000002	Russian Toy	Breed_Dogs	SAMN21036445	SRR15734801	RT002	FAM005449		Bern	Bern		YES	YES	YES	18.13	Male	A1
RUSH000001	Russian Hound	Breed_Dogs	SAMN21035393	SRR16048655	VAK002A1	FAM005858		Helsinki	Helsinki		YES	YES	YES	17.72	Female	B1
RUSH000002	Russian Hound	Breed_Dogs	SAMN21035394	SRR16048654	VAK007A1	FAM005859		Helsinki	Helsinki		YES	YES	YES	16.97	Female	B1
RUSH000003	Russian Hound	Breed_Dogs	SAMN21035395	SRR16048653	VAK009A1	FAM005860		Helsinki	Helsinki		YES	YES	YES	18.71	Female	B1
RUSH000004	Russian Hound	Breed_Dogs	SAMN21035396	SRR16048652	VAK013A1	FAM005861		Helsinki	Helsinki		YES	YES	YES	25.75	Male	B1
RUSH000005	Russian Hound	Breed_Dogs	SAMN21035397	SRR16048623	VAK016A1	FAM005862		Helsinki	Helsinki		YES	YES	YES	25.09	Male	B1
RUSH000006	Russian Hound	Breed_Dogs	SAMN21035398	SRR16048622	VAK017A1	FAM005863		Helsinki	Helsinki		YES	YES	YES	17.02	Female	B1
RUTY000001	Russian Toy	Breed_Dogs	SAMN21035399	SRR16048621	VTK010A1	FAM005882		Helsinki	Helsinki		YES	YES	YES	19.24	Female	A1
RUTY000002	Russian Toy	Breed_Dogs	SAMN21035400	SRR16048620	VTK017A1	FAM005883		Helsinki	Helsinki		YES	YES	YES	17.43	Male	A1
RUTY000003	Russian Toy	Breed_Dogs	SAMN19522925	SRR14750485	FAM005953	4-ADN13230		Rennes	Michigan		YES	YES	YES	18.66	Female	B1
RUTY000004	Russian Toy	Breed_Dogs	SAMN19522926	SRR14750486	FAM005954	3-ADN13236		Rennes	Michigan		YES	YES	YES	18.42	Male	B1
RWSE000001	Irish Red and White Setter	Breed_Dogs	SAMN15625965	SRR12330209	FAM007186	5386		NHGRI	Michigan		YES	YES	YES	20.42	Female	A1
SAAR000001	Saarloos Wolfdog	Breed_Dogs	SAMN21036499	SRR15734765	SR001	FAM005456		Bern	Bern		YES	YES	YES	19.31	Female	B2
SAAR000002	Saarloos Wolfdog	Breed_Dogs	SAMN21035401	SRR16048618	SWH032A1	FAM005834		Helsinki	Helsinki		YES	YES	YES	17.55	Male	B2
SAAR000003	Saarloos Wolfdog	Breed_Dogs	SAMN21035402	SRR16048617	SWH034A1	FAM005835		Helsinki	Helsinki		YES	YES	YES	17.25	Female	B2
SAAR000004	Saarloos Wolfdog	Breed_Dogs	SAMN19522927	SRR14750487	FAM005959	2-ADN13632		Rennes	Michigan		YES	YES	YES	17.12	Male	B2
SALU000001	Saluki	Breed_Dogs	SAMN29845357	SRR20326249	FAM004000	YPi3000		KIZ	Michigan	Oman	YES	NO	NO	22.34	Male	NotApplicable
SALU000002	Saluki	Breed_Dogs	SAMN29845584	SRR20326607	FAM004055	YPi3001		RIT	Michigan		YES	NO	NO	22.3	Male	NotApplicable
SALU000003	Saluki	Breed_Dogs	SAMN29845585	SRR20326444	FAM004113	YP170308-022		RIT	Michigan		YES	YES	YES	18.39	Female	A1
SAMO000001	Samoyed	Breed_Dogs	SAMN15625966	SRR12330208	FAM007206	14503		NHGRI	Michigan		YES	YES	YES	17.56	Female	A1
SAMO000002	Samoyed	Breed_Dogs	SAMN15625967	SRR12330207	FAM007400	33260		NHGRI	Uppsala		YES	YES	YES	18.28	Male	A1
SAMO000003	Samoyed	Breed_Dogs	SAMN15625968	SRR12330206	FAM007279	33261		NHGRI	Michigan		YES	YES	YES	18.55	Female	A1
SAMO000004	Samoyed	Breed_Dogs	SAMN21036446	SRR15734800	SA020	FAM005519		Bern	Bern		YES	YES	YES	17.88	Female	A1
SARP000001	Sarplaninac	Breed_Dogs	SAMN21035403	SRR16048616	SAR001A1	FAM005795		Helsinki	Helsinki		YES	YES	YES	18.56	Female	A1
SARP000002	Sarplaninac	Breed_Dogs	SAMN21035404	SRR16048615	SAR002A1	FAM005796		Helsinki	Helsinki		YES	YES	YES	18.51	Male	B1
SARP000003	Sarplaninac	Breed_Dogs	SAMN21035405	SRR16048614	SAR003A1	FAM005797		Helsinki	Helsinki		YES	YES	YES	17.74	Female	A1
SARP000004	Sarplaninac	Breed_Dogs	SAMN21035406	SRR16048613	SAR004A1	FAM005798		Helsinki	Helsinki		YES	YES	YES	19.47	Female	A1
SCPD000001	Schapendoes	Breed_Dogs	SAMN21036408	SRR15734851	NS078	FAM005618		Bern	Bern		YES	YES	YES	18.66	Female	C1
SCPD000002	Schapendoes	Breed_Dogs	SAMN21036409	SRR15734850	NS079	FAM005619		Bern	Bern		YES	YES	YES	19.07	Female	C1
SCPD000003	Schapendoes	Breed_Dogs	SAMN21035407	SRR16048612	SCP028A1	FAM005804		Helsinki	Helsinki		YES	YES	YES	23.07	Female	C1
SCPD000004	Schapendoes	Breed_Dogs	SAMN21035408	SRR16048611	SCP088A1	FAM005805		Helsinki	Helsinki		YES	YES	YES	20.74	Female	C1
SEAL000001	Sealyham Terrier	Breed_Dogs	SAMN15625969	SRR12330205	FAM007276	33230		NHGRI	Michigan		NO	NO	NO	4.86	Female	NotApplicable
SEAL000002	Sealyham Terrier	Breed_Dogs	SAMN15625970	SRR12330204	FAM007277	33235		NHGRI	Michigan		YES	YES	YES	17.89	Female	B1
SEAL000003	Sealyham Terrier	Breed_Dogs	SAMN15625971	SRR12330202	FAM007280	33281		NHGRI	Michigan		YES	YES	YES	17.57	Male	B1
SEAL000004	Sealyham Terrier	Breed_Dogs	SAMN15625972	SRR12330201	FAM007282	33334		NHGRI	Michigan		YES	YES	YES	13.58	Female	B1
SEAL000005	Sealyham Terrier	Breed_Dogs	SAMN15625973	SRR12330200	FAM007283	33336		NHGRI	Michigan		YES	YES	YES	17.64	Male	A1
SEAL000006	Sealyham Terrier	Breed_Dogs	SAMN15625974	SRR12330199	FAM007401	33398		NHGRI	Uppsala		YES	YES	YES	16.62	Female	B1
SEAL000007	Sealyham Terrier	Breed_Dogs	SAMN15625975	SRR12330198	FAM007402	34153		NHGRI	Uppsala		YES	YES	YES	17.97	Male	C2
SEAL000008	Sealyham Terrier	Breed_Dogs	SAMN15625976	SRR12330197	FAM007404	34460		NHGRI	Uppsala		YES	YES	YES	17.17	Female	B1
SEAL000009	Sealyham Terrier	Breed_Dogs	SAMN15625977	SRR12330196	FAM007403	34461		NHGRI	Uppsala		YES	YES	YES	16.87	Female	B1
SEAL000010	Sealyham Terrier	Breed_Dogs	SAMN15625978	SRR12330195	FAM007405	34462		NHGRI	Uppsala		YES	YES	YES	18.57	Male	B1
SGGO000001	Segugio Italiano	Breed_Dogs	SAMN21035409	SRR16048610	IAK001A1	FAM006725		Helsinki	Helsinki		YES	YES	YES	19.6	Male	A1
SGGO000002	Segugio Italiano	Breed_Dogs	SAMN21035410	SRR16048609	IAK002A1	FAM006726		Helsinki	Helsinki		YES	YES	YES	19.92	Female	A1
SGGO000003	Segugio Italiano	Breed_Dogs	SAMN21035411	SRR16048607	IAK003A1	FAM006727		Helsinki	Helsinki		YES	YES	YES	18.64	Female	B1
SGGO000004	Segugio Italiano	Breed_Dogs	SAMN21035412	SRR16048606	IAK004A1	FAM006728		Helsinki	Helsinki		YES	YES	YES	22.58	Male	D2
SHAR000001	Chinese Shar-Pei	Breed_Dogs	SAMN15625979	SRR12330194	FAM007070	11443		NHGRI	Michigan		NO	NO	NO	17.1	Female	NotApplicable
SHAR000002	Chinese Shar-Pei	Breed_Dogs	SAMN15625980	SRR12330193	FAM007071	11447		NHGRI	Michigan		YES	YES	NO	17.96	Female	A1
SHAR000003	Chinese Shar-Pei	Breed_Dogs	SAMN15625981	SRR12330191	FAM007072	11448		NHGRI	Michigan		YES	YES	YES	21.27	Male	B1
SHIB000001	Shiba Inu	Breed_Dogs	SAMN15625982	SRR12330190	FAM007093	15049		NHGRI	Michigan		YES	YES	YES	19.13	Female	A1
SHIB000002	Shiba Inu	Breed_Dogs	SAMN21036467	SRR15734790	SI001	FAM005454		Bern	Bern		YES	YES	YES	18.14	Male	A2
SHIB000003	Shiba Inu	Breed_Dogs	SAMN21035413	SRR16048605	SHI186A1	FAM005810		Helsinki	Helsinki		YES	YES	YES	17.9	Female	C2
SHIH000001	Shih Tzu	Breed_Dogs	SAMN15625983	SRR12330189	FAM007178	3192		NHGRI	Michigan		YES	YES	YES	19.93	Female	A4
SHIH000002	Shih Tzu	Breed_Dogs	SAMN21036506	SRR15734758	SZ001	FAM005458		Bern	Bern		YES	YES	YES	18.02	Male	B1
SHIH000003	Shih Tzu	Breed_Dogs	SAMN21036507	SRR15734756	SZ003	FAM005459		Bern	Bern		YES	YES	YES	17.23	Female	B1
SHIH000004	Shih Tzu	Breed_Dogs	SAMN21035414	SRR16048604	STZ017A1	FAM005829		Helsinki	Helsinki		YES	YES	YES	22.85	Female	B1
SHIH000005	Shih Tzu	Breed_Dogs	SAMN21035415	SRR16048603	STZ018A1	FAM005830		Helsinki	Helsinki		YES	YES	YES	20.98	Female	B1
SHIL000001	Shiloh Shepherd	Breed_Dogs	SAMN29845224	SRR20326332	FAM007449	4150		Cornell	Uppsala		YES	YES	YES	18.47	Female	A1
SIKU000001	Shikoku	Breed_Dogs	SAMN15625984	SRR12330188	FAM007257	31257		NHGRI	Michigan		YES	YES	YES	18.57	Male	A1
SILK000001	Silky Terrier	Breed_Dogs	SAMN15625985	SRR12330187	FAM007188	6209		NHGRI	Michigan		YES	YES	NO	20.33	Female	B1
SILK000002	Silky Terrier	Breed_Dogs	SAMN15625986	SRR12330186	FAM007190	7299		NHGRI	Michigan		YES	YES	YES	23.95	Male	A1
SILK000003	Silky Terrier	Breed_Dogs	SAMN15625987	SRR12330185	FAM007202	13190		NHGRI	Michigan		YES	YES	YES	18.9	Male	A1
SILK000004	Skye Terrier	Breed_Dogs	SAMN15625988	SRR12330184	FAM007406	33239		NHGRI	Uppsala		YES	YES	YES	12.95	Male	A1
SILK000005	Skye Terrier	Breed_Dogs	SAMN15625989	SRR12330183	FAM007407	33346		NHGRI	Uppsala		YES	YES	YES	17.64	Male	A1
SKIP000001	Schipperke	Breed_Dogs	SAMN15625990	SRR12330182	FAM007166	33120		NHGRI	Michigan		YES	YES	YES	21.67	Female	A1
SKIP000002	Rhodesian Ridgeback	Breed_Dogs	SAMN15625991	SRR12330179	FAM007168	33172		NHGRI	Michigan		YES	YES	YES	19.01	Male	B1
SKIP000003	Schipperke	Breed_Dogs	SAMN21036468	SRR15734789	SK027	FAM005524		Bern	Bern		YES	YES	YES	18.33	Female	A1
SKIP000004	Schipperke	Breed_Dogs	SAMN21036469	SRR15734788	SK028	FAM005525		Bern	Bern		YES	YES	YES	23.4	Female	A1
SKIP000005	Schipperke	Breed_Dogs	SAMN21035416	SRR16048602	SCH408A1	FAM005802		Helsinki	Helsinki		YES	YES	YES	18.67	Female	B1
SKIP000006	Schipperke	Breed_Dogs	SAMN21035417	SRR16048601	SCH624A1	FAM005803		Helsinki	Helsinki		YES	YES	YES	18.38	Female	B1
SKWH000001	Silken Windhound	Breed_Dogs	SAMN21035418	SRR16048600	SVK001A1	FAM005832		Helsinki	Helsinki		YES	YES	YES	19.86	Male	A1
SKWH000002	Silken Windhound	Breed_Dogs	SAMN21035419	SRR16048599	SVK002A1	FAM005833		Helsinki	Helsinki		YES	YES	YES	17.46	Female	A1
SKYE000003	Skye Terrier	Breed_Dogs	SAMN29845225	SRR20326320	FAM009500			Cornell	Uppsala		YES	YES	YES	17.35	Female	A1
SLAP000001	Swedish Lapphund	Breed_Dogs	SAMN21035420	SRR16048598	RLK001A1	FAM006775		Helsinki	Helsinki		YES	YES	YES	16.36	Female	D1
SLAP000002	Swedish Lapphund	Breed_Dogs	SAMN21035421	SRR16048596	RLK003A1	FAM006776		Helsinki	Helsinki		YES	YES	YES	18.33	Male	D1
SLAP000003	Swedish Lapphund	Breed_Dogs	SAMN21035422	SRR16048567	RLK004A1	FAM006777		Helsinki	Helsinki		YES	YES	YES	18.6	Female	D1
SLCU000001	Slovak Cuvac	Breed_Dogs	SAMN21035423	SRR16048566	SVC002A1	FAM006785		Helsinki	Helsinki		YES	YES	YES	17.62	Female	A1
SLCU000002	Slovak Cuvac	Breed_Dogs	SAMN21035424	SRR16048565	SVC006A1	FAM006786		Helsinki	Helsinki		YES	YES	YES	17.41	Female	A1
SLCU000003	Slovak Cuvac	Breed_Dogs	SAMN21035425	SRR16048564	SVC007A1	FAM006787		Helsinki	Helsinki		YES	YES	YES	17.75	Male	A1
SLCU000004	Slovak Cuvac	Breed_Dogs	SAMN21035426	SRR16048563	SVC010A1	FAM006788		Helsinki	Helsinki		YES	YES	YES	17.55	Female	A1
SLCU000005	Slovak Cuvac	Breed_Dogs	SAMN21035427	SRR16048562	SVC013A1	FAM006789		Helsinki	Helsinki		YES	YES	YES	18.62	Male	A1
SLCU000006	Slovak Cuvac	Breed_Dogs	SAMN21035428	SRR16048561	SVC014A1	FAM006790		Helsinki	Helsinki		YES	YES	YES	17.48	Female	A1
SLCU000007	Slovak Cuvac	Breed_Dogs	SAMN21035429	SRR16048560	SVC015A1	FAM006791		Helsinki	Helsinki		YES	YES	YES	18.23	Male	A1
SLKV000001	Slovensky Kopov	Breed_Dogs	SAMN19522928	SRR14750488	FAM006534	4-ADN4758		Rennes	Michigan		YES	YES	YES	17.99	Male	B1
SLKV000002	Slovensky Kopov	Breed_Dogs	SAMN19522929	SRR14750489	FAM006542	4-ADN5415		Rennes	Michigan		YES	YES	YES	19.74	Female	A1
SLOU000001	Sloughi	Breed_Dogs	SAMN29845586	SRR20326443	FAM008000	YP170308-026		RIT	Michigan		YES	NO	NO	15.91	Male	NotApplicable
SLOU000002	Sloughi	Breed_Dogs	SAMN21036458	SRR15734794	SG010	FAM005523		Bern	Bern		YES	YES	YES	18.76	Male	A1
SLOU000003	Sloughi	Breed_Dogs	SAMN21035430	SRR16048559	SLO006A1	FAM005815		Helsinki	Helsinki		YES	YES	YES	18.56	Female	A1
SLWP000001	Slovakian Wirehaired Pointer	Breed_Dogs	SAMN21036502	SRR15734762	SV003	FAM005541		Bern	Bern		YES	YES	YES	19.48	Female	A1
SLWP000002	Slovakian Wirehaired Pointer	Breed_Dogs	SAMN21036504	SRR15734760	SV024	FAM005542		Bern	Bern		YES	YES	YES	18.13	Female	A1
SLWP000003	Slovakian Wirehaired Pointer	Breed_Dogs	SAMN21036503	SRR15734761	SV010	FAM005640		Bern	Bern		YES	YES	YES	17.82	Male	A1
SLWP000004	Slovakian Wirehaired Pointer	Breed_Dogs	SAMN21036505	SRR15734759	SV025	FAM005641		Bern	Bern		YES	YES	YES	18.81	Female	A1
SMCD000001	Saint Miguel Cattle Dog	Breed_Dogs	SAMN21035431	SRR16048557	SMF001A1	FAM005816		Helsinki	Helsinki		YES	YES	YES	19.44	Female	A1
SMCD000002	Saint Miguel Cattle Dog	Breed_Dogs	SAMN21035432	SRR16048556	SMF002A1	FAM005817		Helsinki	Helsinki		YES	YES	YES	18.39	Female	A1
SMFX000001	Smooth Fox Terrier	Breed_Dogs	SAMN15625992	SRR12330178	FAM007194	7935		NHGRI	Michigan		YES	YES	YES	19.09	Female	A1
SMFX000002	Smooth Fox Terrier	Breed_Dogs	SAMN15625993	SRR12330177	FAM007238	29481		NHGRI	Michigan		YES	YES	YES	20.36	Male	A1
SMFX000003	Smooth Fox Terrier	Breed_Dogs	SAMN15625994	SRR12330176	FAM007242	30235		NHGRI	Michigan		YES	YES	YES	17.51	Male	A1
SMFX000004	Smooth Fox Terrier	Breed_Dogs	SAMN15625995	SRR12330175	FAM007408	30262		NHGRI	Uppsala		YES	YES	YES	16.5	Female	A1
SMFX000005	Smooth Fox Terrier	Breed_Dogs	SAMN15625996	SRR12330174	FAM007245	30263		NHGRI	Michigan		YES	YES	YES	20.2	Female	A1
SMFX000006	Smooth Fox Terrier	Breed_Dogs	SAMN15625997	SRR12330173	FAM007409	33294		NHGRI	Uppsala		NO	NO	NO	5.04	Male	NotApplicable
SMSH000001	Small Swiss Hound	Breed_Dogs	SAMN21036487	SRR16288942	SN009	FAM005532		Bern	Uppsala		YES	YES	YES	17.66	Female	B1
SMSH000002	Small Swiss Hound	Breed_Dogs	SAMN21036488	SRR16288941	SN011	FAM005533		Bern	Uppsala		YES	YES	YES	16.53	Male	B1
SMSH000003	Small Swiss Hound	Breed_Dogs	SAMN21036490	SRR16288940	SN015	FAM005534		Bern	Uppsala		YES	YES	YES	16.57	Male	A1
SMSH000004	Small Swiss Hound	Breed_Dogs	SAMN21036491	SRR16288939	SN019	FAM005535		Bern	Uppsala		YES	YES	YES	17.71	Female	B1
SMSH000005	Small Swiss Hound	Breed_Dogs	SAMN21036493	SRR16288938	SN034	FAM005536		Bern	Uppsala		YES	YES	YES	19.11	Male	B1
SMSH000006	Small Swiss Hound	Breed_Dogs	SAMN21036494	SRR16288937	SN044	FAM005537		Bern	Uppsala		YES	YES	YES	16.1	Female	B1
SMSH000007	Small Swiss Hound	Breed_Dogs	SAMN21036483	SRR15734779	SN009	FAM005532		Bern	Bern		YES	YES	YES	17.61	Female	B1
SMSH000008	Small Swiss Hound	Breed_Dogs	SAMN21036484	SRR15734778	SN011	FAM005533		Bern	Bern		YES	YES	YES	18.18	Female	A1
SMSH000009	Small Swiss Hound	Breed_Dogs	SAMN21036485	SRR15734777	SN015	FAM005534		Bern	Bern		YES	YES	YES	18.46	Male	B1
SMSH000010	Small Swiss Hound	Breed_Dogs	SAMN21036486	SRR15734776	SN019	FAM005535		Bern	Bern		YES	YES	YES	19.13	Female	A1
SMSH000011	Small Swiss Hound	Breed_Dogs	SAMN21036489	SRR15734775	SN034	FAM005536		Bern	Bern		YES	YES	YES	18.64	Female	A1
SMSH000012	Small Swiss Hound	Breed_Dogs	SAMN21036492	SRR15734774	SN044	FAM005537		Bern	Bern		YES	YES	YES	18.1	Female	B1
SPEI000001	Chinese Shar-Pei	Breed_Dogs	SAMN21036496	SRR15734772	SP001	FAM005538		Bern	Bern		YES	YES	YES	18.21	Male	B1
SPEI000002	Chinese Shar-Pei	Breed_Dogs	SAMN21036497	SRR15734770	SP005	FAM005539		Bern	Bern		YES	YES	YES	18.73	Female	B1
SPEI000003	Chinese Shar-Pei	Breed_Dogs	SAMN21036498	SRR15734769	SP012	FAM005540		Bern	Bern		YES	YES	YES	18.81	Male	B1
SPEI000004	Chinese Shar-Pei	Breed_Dogs	SAMN21035433	SRR16048555	PEI004A1	FAM005732		Helsinki	Helsinki		YES	YES	YES	20.9	Female	A2
SPEI000005	Chinese Shar-Pei	Breed_Dogs	SAMN19522930	SRR14750490	FAM005940	2-ADN12530		Rennes	Michigan		YES	YES	YES	20.06	Male	B1
SPEI000006	Chinese Shar-Pei	Breed_Dogs	SAMN19522931	SRR14750491	FAM006580	2-ADN8428		Rennes	Michigan		YES	YES	YES	20.49	Male	A1
SPIN000001	Spinone Italiano	Breed_Dogs	SAMN15625998	SRR12330172	FAM007031	937		NHGRI	Michigan		YES	YES	YES	20.41	Female	A1
SPIN000002	Spinone Italiano	Breed_Dogs	SAMN15625999	SRR12330171	FAM007139	30560		NHGRI	Michigan		YES	YES	YES	18.51	Female	A1
SPIN000003	Spinone Italiano	Breed_Dogs	SAMN15626000	SRR12330170	FAM007140	30561		NHGRI	Michigan		NO	NO	NO	17.82	Male	NotApplicable
SPIN000004	Spinone Italiano	Breed_Dogs	SAMN15626001	SRR12330168	FAM007260	31638		NHGRI	Michigan		YES	YES	YES	22.44	Male	A1
SPIN000005	Spinone Italiano	Breed_Dogs	SAMN15626002	SRR12330167	FAM007261	31641		NHGRI	Michigan		YES	YES	YES	20.22	Male	A1
SPIN000006	Spinone Italiano	Breed_Dogs	SAMN15626003	SRR12330166	FAM007262	31645		NHGRI	Michigan		YES	YES	YES	18.52	Male	A1
SPIN000007	Spinone Italiano	Breed_Dogs	SAMN21035434	SRR16048554	SPM054A1	FAM005825		Helsinki	Helsinki		YES	YES	YES	17.44	Female	A1
SPIN000008	Spinone Italiano	Breed_Dogs	SAMN21035435	SRR16048553	SPM074A1	FAM005826		Helsinki	Helsinki		YES	YES	YES	19.49	Male	A1
SPMT000001	Spanish Mastiff	Breed_Dogs	SAMN21035436	SRR16048552	EM001A1	FAM006700		Helsinki	Helsinki		YES	YES	YES	20.88	Male	A1
SPMT000002	Spanish Mastiff	Breed_Dogs	SAMN21035437	SRR16048551	EM002A1	FAM006701		Helsinki	Helsinki		YES	YES	YES	17.72	Female	A1
SPMT000003	Spanish Mastiff	Breed_Dogs	SAMN21035438	SRR16048550	EM004A1	FAM006702		Helsinki	Helsinki		YES	YES	YES	17.73	Female	A1
SPMT000004	Spanish Mastiff	Breed_Dogs	SAMN21035439	SRR16048549	EM005A1	FAM006703		Helsinki	Helsinki		YES	YES	YES	18.3	Male	A1
SPMT000005	Spanish Mastiff	Breed_Dogs	SAMN19522932	SRR14750493	FAM005925	4-ADN11919		Rennes	Michigan		YES	YES	YES	21.07	Male	A1
SPMT000006	Spanish Mastiff	Breed_Dogs	SAMN19522933	SRR14750494	FAM005977	4-ADN1596		Rennes	Michigan		YES	YES	YES	18.12	Female	A1
SPWD000001	Spanish Water Dog	Breed_Dogs	SAMN21036424	SRR15734833	PE247	FAM005622		Bern	Bern		YES	YES	YES	18.24	Female	A1
SPWD000002	Spanish Water Dog	Breed_Dogs	SAMN20151489	SRR15100229	EVK435A1	FAM005337		Helsinki	Helsinki		YES	YES	YES	20.64	Female	A1
SPWD000003	Spanish Water Dog	Breed_Dogs	SAMN19522934	SRR14750495	FAM005976	2-ADN13947		Rennes	Michigan		YES	YES	YES	21.73	Female	C1
SPWD000004	Spanish Water Dog	Breed_Dogs	SAMN19522935	SRR14750496	FAM006614	3-ADNPR3914_2		Rennes	Michigan		YES	YES	YES	17.3	Female	A1
SRAB000001	Sarabi	Breed_Dogs	SAMN29845358	SRR20326248	FAM004077	ypi2901		KIZ	Michigan	Sarabi Iran	YES	YES	YES	18.06	Female	A1
SRAB000002	Sarabi	Breed_Dogs	SAMN29845359	SRR20326247	FAM004078	ypi2902		KIZ	Michigan	Sarabi Iran	YES	YES	YES	19.79	Male	A1
SROV000001	South Russian Ovcharka	Breed_Dogs	SAMN21036495	SRR15734773	SO001	FAM005455		Bern	Bern		YES	YES	YES	17.94	Female	C1
SROV000002	Unknown	Breed_Dogs	SAMN21035440	SRR16048548	EVP001A1	FAM006708		Helsinki	Helsinki		YES	NO	NO	18.83	Female	NotApplicable
SROV000003	South Russian Ovcharka	Breed_Dogs	SAMN21035441	SRR16048545	EVP010A1	FAM006709		Helsinki	Helsinki		YES	YES	YES	17.95	Male	C1
SROV000004	South Russian Ovcharka	Breed_Dogs	SAMN21035442	SRR16048544	EVP011A1	FAM006710		Helsinki	Helsinki		YES	YES	YES	19.01	Female	C1
SSHP000001	Shetland Sheepdog	Breed_Dogs	SAMN15626004	SRR12330165	FAM007113	26810		NHGRI	Michigan		YES	YES	YES	21.26	Female	A1
SSHP000002	Shetland Sheepdog	Breed_Dogs	SAMN15626005	SRR12330164	FAM007128	28494		NHGRI	Michigan		YES	YES	YES	19.05	Male	A1
SSHP000003	Shetland Sheepdog	Breed_Dogs	SAMN21036500	SRR15734764	SS075	FAM005627		Bern	Bern		YES	YES	YES	18.72	Female	A1
SSHP000004	Shetland Sheepdog	Breed_Dogs	SAMN21035443	SRR16048543	SHE451A1	FAM005809		Helsinki	Helsinki		YES	YES	YES	18.94	Female	B1
SSNZ000001	Standard Schnauzer	Breed_Dogs	SAMN21036482	SRR15734780	SM038	FAM005639		Bern	Bern		YES	YES	YES	18.13	Male	C2
STAF000001	Staffordshire Bull Terrier	Breed_Dogs	SAMN15626006	SRR12330163	FAM007233	27211		NHGRI	Michigan		YES	YES	YES	18.6	Female	A1
STAF000002	Staffordshire Bull Terrier	Breed_Dogs	SAMN15626007	SRR12330162	FAM007243	30237		NHGRI	Michigan		YES	YES	YES	17.83	Female	A1
STAF000003	Staffordshire Bull Terrier	Breed_Dogs	SAMN15626008	SRR12330161	FAM007244	30240		NHGRI	Michigan		YES	YES	YES	20.09	Male	A1
STAF000004	Staffordshire Bull Terrier	Breed_Dogs	SAMN21035444	SRR16048542	SBT131A1	FAM005799		Helsinki	Helsinki		YES	YES	YES	18.18	Male	A1
STAF000005	Staffordshire Bull Terrier	Breed_Dogs	SAMN21035445	SRR16048541	SBT238A1	FAM005800		Helsinki	Helsinki		YES	YES	YES	19.64	Male	A1
STAF000006	Staffordshire Bull Terrier	Breed_Dogs	SAMN21035446	SRR16048540	SBT477B1	FAM005801		Helsinki	Helsinki		YES	YES	YES	18.8	Male	A1
STBD000001	Saint Bernard	Breed_Dogs	SAMN15626009	SRR12330160	FAM007399	12749		NHGRI	Uppsala		YES	YES	YES	17.5	Male	A1
STBD000002	Saint Bernard	Breed_Dogs	SAMN15626010	SRR12330159	FAM007397	12750		NHGRI	Uppsala		YES	YES	YES	17.44	Male	A1
STBD000003	Saint Bernard	Breed_Dogs	SAMN15626011	SRR12330157	FAM007398	12751		NHGRI	Uppsala		YES	YES	YES	16.4	Female	B1
STBD000004	Saint Bernard	Breed_Dogs	SAMN21036448	SRR15734799	SB002	FAM005520		Bern	Bern		YES	YES	YES	17.7	Female	A1
STBD000005	Saint Bernard	Breed_Dogs	SAMN21036454	SRR15734798	SB034	FAM005521		Bern	Bern		YES	YES	YES	23.63	Male	A1
STBD000006	Saint Bernard	Breed_Dogs	SAMN21036455	SRR15734797	SB036	FAM005522		Bern	Bern		YES	YES	YES	18.9	Male	A1
STBD000007	Saint Bernard	Breed_Dogs	SAMN19522936	SRR14750497	FAM006567	2-ADN7502		Rennes	Michigan		YES	YES	YES	23.2	Female	A1
STBD000008	Saint Bernard	Breed_Dogs	SAMN21036447	SRR16288962	SB001	FAM004594		Bern	Uppsala		YES	YES	YES	16.05	Female	A1
STBD000009	Saint Bernard	Breed_Dogs	SAMN21036449	SRR16288961	SB004	FAM004595		Bern	Uppsala		YES	YES	YES	16.49	Female	A1
STBD000010	Saint Bernard	Breed_Dogs	SAMN21036450	SRR16288960	SB006	FAM004596		Bern	Uppsala		YES	YES	YES	20.09	Female	A1
STBD000011	Saint Bernard	Breed_Dogs	SAMN21036451	SRR16288959	SB014	FAM004597		Bern	Uppsala		YES	YES	YES	17.8	Female	A1
STBD000012	Saint Bernard	Breed_Dogs	SAMN21036452	SRR16288958	SB024	FAM004598		Bern	Uppsala		YES	YES	YES	17.57	Female	A1
STBD000013	Saint Bernard	Breed_Dogs	SAMN21036453	SRR16288956	SB030	FAM004599		Bern	Uppsala		YES	YES	YES	17.75	Female	A1
STBY000001	Stabyhoun	Breed_Dogs	SAMN15626012	SRR12330156	FAM007275	33193		NHGRI	Michigan		YES	YES	YES	23.1	Male	A1
STBY000002	Stabyhoun	Breed_Dogs	SAMN21035447	SRR16048539	STA045A1	FAM006810		Helsinki	Helsinki		YES	YES	YES	16.99	Female	A1
STBY000003	Stabyhoun	Breed_Dogs	SAMN21035448	SRR16048538	STA002A1	FAM006811		Helsinki	Helsinki		YES	YES	YES	17.87	Male	B1
STBY000004	Stabyhoun	Breed_Dogs	SAMN21035449	SRR16048537	STA037A1	FAM006812		Helsinki	Helsinki		YES	YES	YES	18.74	Female	A1
SUSP000001	Saint-Usuge Spaniel	Breed_Dogs	SAMN21035450	SRR16048536	SUS001A1	FAM005831		Helsinki	Helsinki		YES	YES	YES	21.54	Male	A1
SUSX000001	Sussex Spaniel	Breed_Dogs	SAMN15626013	SRR12330155	FAM007410	954		NHGRI	Uppsala		YES	YES	YES	17.43	Male	A1
SUSX000002	Sussex Spaniel	Breed_Dogs	SAMN15626014	SRR12330154	FAM007411	5896		NHGRI	Uppsala		YES	YES	YES	16.27	Female	A1
SUSX000003	Sussex Spaniel	Breed_Dogs	SAMN15626015	SRR12330153	FAM007412	5905		NHGRI	Uppsala		YES	YES	YES	16.05	Female	A1
SUSX000004	Sussex Spaniel	Breed_Dogs	SAMN15626016	SRR12330152	FAM007050	6098		NHGRI	Michigan		YES	YES	YES	19.28	Male	A1
SUSX000005	Sussex Spaniel	Breed_Dogs	SAMN15626017	SRR12330151	FAM007054	7640		NHGRI	Michigan		YES	YES	YES	16.82	Female	A1
SUSX000006	Sussex Spaniel	Breed_Dogs	SAMN15626018	SRR12330150	FAM007055	7643		NHGRI	Michigan		YES	YES	YES	20.8	Female	A1
SVAL000007	Swedish Vallhund	Breed_Dogs	SAMN15626019	SRR12330149	FAM007066	10043		NHGRI	Michigan		YES	YES	YES	17.82	Male	A1
SVAL000008	Swedish Vallhund	Breed_Dogs	SAMN21035451	SRR16048534	LJP283A2	FAM005672		Helsinki	Helsinki		YES	YES	YES	20.01	Female	A1
SVAL000009	Swedish Vallhund	Breed_Dogs	SAMN21035452	SRR16048533	LJP362A1	FAM005673		Helsinki	Helsinki		YES	YES	YES	19.82	Female	A1
SVAL000010	Swedish Vallhund	Breed_Dogs	SAMN21035453	SRR16048532	LJP463A1	FAM005674		Helsinki	Helsinki		YES	YES	YES	18.77	Male	A1
SWEH000001	Swedish Elkhound	Breed_Dogs	SAMN21035454	SRR16048531	JPK094A1	FAM005371		Helsinki	Helsinki		YES	YES	YES	20.58	Male	D1
SWEH000002	Swedish Elkhound	Breed_Dogs	SAMN21035455	SRR16048530	JPK109A1	FAM005372		Helsinki	Helsinki		YES	YES	YES	18.69	Male	D1
SWEH000003	Swedish Elkhound	Breed_Dogs	SAMN21035456	SRR16048529	JPK267A1	FAM005373		Helsinki	Helsinki		YES	YES	YES	18.96	Male	D1
SWEH000004	Swedish Elkhound	Breed_Dogs	SAMN21035457	SRR16048528	JPK310A1	FAM005374		Helsinki	Helsinki		YES	YES	YES	20.8	Female	D1
SWHN000001	Swiss Hound	Breed_Dogs	SAMN21036470	SRR15734787	SLH012	FAM005526		Bern	Bern		YES	YES	YES	17.33	Female	A1
SWHN000002	Swiss Hound	Breed_Dogs	SAMN21036471	SRR15734786	SLH014	FAM005527		Bern	Bern		YES	YES	YES	18.38	Male	A1
SWHN000003	Swiss Hound	Breed_Dogs	SAMN21036472	SRR15734785	SLH023	FAM005528		Bern	Bern		YES	YES	YES	17.58	Female	A1
SWHN000004	Swiss Hound	Breed_Dogs	SAMN21036473	SRR15734784	SLH049	FAM005529		Bern	Bern		YES	YES	YES	20.24	Male	A1
SWHN000005	Swiss Hound	Breed_Dogs	SAMN21036474	SRR15734783	SLH081	FAM005530		Bern	Bern		YES	YES	YES	20.16	Female	A1
SWHN000006	Swiss Hound	Breed_Dogs	SAMN21036475	SRR15734781	SLH082	FAM005531		Bern	Bern		YES	YES	YES	20.49	Male	B1
SWHN000007	Swiss Hound	Breed_Dogs	SAMN21036476	SRR16288949	SLH41	FAM004612		Bern	Uppsala		YES	YES	YES	17.75	Female	A1
SWHN000008	Swiss Hound	Breed_Dogs	SAMN21036477	SRR16288948	SLH44	FAM004613		Bern	Uppsala		YES	YES	YES	17	Female	A1
SWHN000009	Swiss Hound	Breed_Dogs	SAMN21036478	SRR16288947	SLH56	FAM004614		Bern	Uppsala		YES	YES	YES	20.14	Female	A1
SWHN000010	Swiss Hound	Breed_Dogs	SAMN21036479	SRR16288945	SLH58	FAM004615		Bern	Uppsala		YES	YES	YES	24.07	Female	B1
SWHN000011	Swiss Hound	Breed_Dogs	SAMN21036480	SRR16288944	SLH66	FAM004616		Bern	Uppsala		YES	YES	YES	25.31	Male	A1
SWHN000012	Swiss Hound	Breed_Dogs	SAMN21036481	SRR16288943	SLH70	FAM004617		Bern	Uppsala		YES	YES	YES	22.25	Female	A1
SWWE000001	Swedish White Elkhound	Breed_Dogs	SAMN21035458	SRR16048527	VRH003A1	FAM006801		Helsinki	Helsinki		YES	YES	YES	17.86	Male	C2
SWWE000002	Swedish White Elkhound	Breed_Dogs	SAMN21035459	SRR16048526	VRH006A1	FAM006802		Helsinki	Helsinki		YES	YES	YES	18.02	Female	A1
SWWE000003	Swedish White Elkhound	Breed_Dogs	SAMN21035460	SRR16048525	VRH009A1	FAM006803		Helsinki	Helsinki		NO	NO	NO	16.9	Female	NotApplicable
SWWE000004	Swedish White Elkhound	Breed_Dogs	SAMN21035461	SRR16048523	VRH013A1	FAM006804		Helsinki	Helsinki		YES	YES	YES	18.28	Male	C2
SWWE000005	Swedish White Elkhound	Breed_Dogs	SAMN21035462	SRR16048522	VRH014A1	FAM006805		Helsinki	Helsinki		YES	YES	YES	17.98	Male	A1
SWWE000006	Swedish White Elkhound	Breed_Dogs	SAMN21035463	SRR16048521	VRH016A1	FAM006806		Helsinki	Helsinki		YES	YES	YES	17.06	Female	C2
SWWE000007	Swedish White Elkhound	Breed_Dogs	SAMN21035464	SRR16048520	VRH019A1	FAM006807		Helsinki	Helsinki		YES	YES	YES	19.8	Male	A1
SWWE000008	Swedish White Elkhound	Breed_Dogs	SAMN21035465	SRR16048519	VRH020A1	FAM006808		Helsinki	Helsinki		YES	YES	YES	18.5	Male	A1
TAZI000001	Tazi	Breed_Dogs	SAMN29845587	SRR20326442	FAM004004	ZTD16061301		RIT	Michigan		YES	YES	YES	19.63	Female	B1
TAZI000002	Tazi	Breed_Dogs	SAMN29845588	SRR20326441	FAM004030	ZTD16061327		RIT	Michigan		NO	NO	NO	20.1	Male	NotApplicable
TAZI000003	Tazi	Breed_Dogs	SAMN29845589	SRR20326440	FAM004031	ZTD16061328		RIT	Michigan		YES	YES	YES	19.76	Male	B1
TERV000001	Cardigan Welsh Corgi	Breed_Dogs	SAMN15626026	SRR12330141	FAM007170			NHGRI	Michigan		YES	YES	YES	17.88	Female	A1
TERV000002	Belgian Tervuren	Breed_Dogs	SAMN15626027	SRR12330140	FAM007315			NHGRI	Uppsala		YES	YES	YES	17.24	Male	A1
TERV000003	Belgian Tervuren	Breed_Dogs	SAMN21036374	SRR15734649	MA224	FAM005606		Bern	Bern		YES	YES	YES	21.87	Female	B1
TERV000004	Belgian Tervuren	Breed_Dogs	SAMN20151401	SRR15100178	BPT328	FAM005249		Helsinki	Helsinki		YES	YES	YES	18.83	Male	B1
TERV000005	Belgian Tervuren	Breed_Dogs	SAMN20151402	SRR15100177	BPT392	FAM005250		Helsinki	Helsinki		YES	YES	YES	21.17	Male	B1
TERV000006	Belgian Tervuren	Breed_Dogs	SAMN19522937	SRR14750498	FAM006612	2-ADNPR3904		Rennes	Michigan		YES	YES	YES	20.12	Male	B1
THAI000001	Thai Ridgeback	Breed_Dogs	SAMN21036509	SRR15734755	TR001	FAM005460		Bern	Bern		YES	YES	YES	17.91	Male	A1
THAI000002	Thai Ridgeback	Breed_Dogs	SAMN21036510	SRR15734754	TR002	FAM005461		Bern	Bern		YES	YES	YES	17.2	Male	A5
THAI000003	Thai Ridgeback	Breed_Dogs	SAMN21036511	SRR15734753	TR003	FAM005462		Bern	Bern		YES	YES	YES	17.04	Female	B1
THAI000004	Thai Ridgeback	Breed_Dogs	SAMN21035466	SRR16048518	THR001A1	FAM006792		Helsinki	Helsinki		YES	YES	YES	19.09	Female	A1
THAI000005	Thai Ridgeback	Breed_Dogs	SAMN21035467	SRR16048517	THR007A1	FAM006793		Helsinki	Helsinki		YES	YES	YES	18.85	Female	A2
THAI000006	Thai Ridgeback	Breed_Dogs	SAMN21035468	SRR16048516	THR008A1	FAM006794		Helsinki	Helsinki		YES	YES	YES	17.02	Female	A5
THAI000007	Thai Ridgeback	Breed_Dogs	SAMN21035469	SRR16048515	THR011A1	FAM006795		Helsinki	Helsinki		YES	YES	YES	16.8	Female	A1
THAI000008	Thai Ridgeback	Breed_Dogs	SAMN21035470	SRR16048514	THR013A1	FAM006796		Helsinki	Helsinki		YES	YES	YES	17.6	Female	A5
THAI000009	Thai Ridgeback	Breed_Dogs	SAMN21035471	SRR16048512	THR020A1	FAM006797		Helsinki	Helsinki		YES	YES	YES	17.13	Female	A2
TIBS000001	Tibetan Spaniel	Breed_Dogs	SAMN15626020	SRR12330148	FAM007418	5381		NHGRI	Uppsala		YES	YES	YES	16.88	Male	B1
TIBS000002	Tibetan Spaniel	Breed_Dogs	SAMN15626021	SRR12330146	FAM007415	24777		NHGRI	Uppsala		NO	NO	NO	20.37	Male	NotApplicable
TIBS000003	Tibetan Spaniel	Breed_Dogs	SAMN15626022	SRR12330145	FAM007416	30674		NHGRI	Uppsala		NO	NO	NO	11.44	Female	NotApplicable
TIBS000004	Tibetan Spaniel	Breed_Dogs	SAMN15626023	SRR12330144	FAM007417	31251		NHGRI	Uppsala		NO	NO	NO	11.26	Female	NotApplicable
TIBS000005	Tibetan Spaniel	Breed_Dogs	SAMN21035472	SRR16048455	TS362A1	FAM005844		Helsinki	Helsinki		YES	YES	YES	17.28	Female	B1
TIBS000006	Tibetan Spaniel	Breed_Dogs	SAMN21035473	SRR16048454	TS393A1	FAM005845		Helsinki	Helsinki		YES	YES	YES	19.35	Female	B1
TIBS000007	Tibetan Spaniel	Breed_Dogs	SAMN21035474	SRR16048453	TS444A1	FAM005846		Helsinki	Helsinki		YES	YES	YES	21.01	Female	B1
TIBT000001	Tibetan Terrier	Breed_Dogs	SAMN21036512	SRR15734752	TT014	FAM005543		Bern	Bern		YES	YES	YES	19.99	Male	A1
TIBT000002	Tibetan Terrier	Breed_Dogs	SAMN21035475	SRR16048452	TT333A1	FAM005847		Helsinki	Helsinki		YES	YES	YES	19.9	Female	A1
TIBT000003	Tibetan Terrier	Breed_Dogs	SAMN19522938	SRR14750499	FAM006549	2-ADN6183		Rennes	Michigan		YES	YES	YES	22.27	Female	A1
TMSK000001	Tamaskan	Breed_Dogs	SAMN21036508	SRR16288936	TM002	FAM004636		Bern	Uppsala		YES	YES	YES	18.21	Male	A2
TOSA000001	Tosa Inu	Breed_Dogs	SAMN15626024	SRR12330143	FAM007419	21914		NHGRI	Uppsala		YES	YES	YES	17.02	Male	B1
TOSA000002	Tosa Inu	Breed_Dogs	SAMN15626025	SRR12330142	FAM007420	25491		NHGRI	Uppsala		YES	YES	YES	17.36	Male	B1
TOSA000003	Tosa Inu	Breed_Dogs	SAMN29845226	SRR20326662	FAM009505			Cornell	Uppsala		YES	YES	YES	19.33	Female	B1
TPOO000001	Toy Poodle	Breed_Dogs	SAMN21036429	SRR15734828	PL062	FAM005623		Bern	Bern		YES	YES	YES	17.86	Female	B1
TPOO000002	Toy Poodle	Breed_Dogs	SAMN19522939	SRR14750500	FAM005899	2-ADN10551		Rennes	Michigan		YES	YES	YES	20.08	Female	B1
TURM000001	Turkish Mastiff	Breed_Dogs	SAMN29845590	SRR20326439	FAM004011	ZTD16061278		RIT	Michigan		YES	YES	YES	18.72	Female	A1
TURM000002	Turkish Mastiff	Breed_Dogs	SAMN29845591	SRR20326438	FAM004027	ZTD16061277		RIT	Michigan		YES	YES	YES	19.71	Male	A1
TURM000003	Turkish Mastiff	Breed_Dogs	SAMN29845592	SRR20326437	FAM004040	ZTD16061274		RIT	Michigan		YES	YES	YES	19.04	Male	A1
TURM000004	Turkish Mastiff	Breed_Dogs	SAMN29845593	SRR20326436	FAM004041	ZTD16061276		RIT	Michigan		YES	YES	YES	20.68	Male	A1
TURM000005	Turkish Mastiff	Breed_Dogs	SAMN29845594	SRR20326435	FAM004054	ZTD16061275		RIT	Michigan		YES	YES	YES	18.78	Female	A1
TWCH000001	Unknown	Breed_Dogs	SAMN15626028	SRR12330139	FAM007106	23115		NHGRI	Michigan		YES	NO	NO	17.22	Male	NotApplicable
TWCH000002	Treeing Walker Coonhound	Breed_Dogs	SAMN15626029	SRR12330138	FAM007115	26987		NHGRI	Michigan		YES	YES	YES	18.38	Male	B1
TYFX000001	Toy Fox Terrier	Breed_Dogs	SAMN15626030	SRR12330137	FAM007196	8963		NHGRI	Michigan		YES	YES	YES	18.49	Female	B1
TYFX000002	Toy Fox Terrier	Breed_Dogs	SAMN15626031	SRR12330135	FAM007197	8969		NHGRI	Michigan		YES	YES	YES	22.13	Male	A4
TYFX000003	Toy Fox Terrier	Breed_Dogs	SAMN15626032	SRR12330134	FAM007198	8973		NHGRI	Michigan		YES	YES	YES	22.3	Male	B1
TYFX000004	Toy Fox Terrier	Breed_Dogs	SAMN15626033	SRR12330133	FAM007421	9014		NHGRI	Uppsala		YES	YES	YES	18.26	Female	A4
TYFX000005	Toy Fox Terrier	Breed_Dogs	SAMN15626034	SRR12330132	FAM007201	13139		NHGRI	Michigan		YES	YES	YES	21	Female	A4
TYFX000006	Toy Fox Terrier	Breed_Dogs	SAMN15626035	SRR12330131	FAM007203	13287		NHGRI	Michigan		YES	YES	YES	22.44	Female	A4
TYFX000007	Toy Fox Terrier	Breed_Dogs	SAMN15626036	SRR12330130	FAM007204	13289		NHGRI	Michigan		YES	YES	YES	17.6	Female	A1
TYFX000008	Toy Fox Terrier	Breed_Dogs	SAMN21035476	SRR16048451	ATF001A1	FAM006668		Helsinki	Helsinki		YES	YES	YES	19.17	Male	B1
TYFX000009	Toy Fox Terrier	Breed_Dogs	SAMN21035477	SRR16048450	ATF002A1	FAM006669		Helsinki	Helsinki		YES	YES	YES	20.19	Male	A4
TYFX000010	Toy Fox Terrier	Breed_Dogs	SAMN21035478	SRR16048449	ATF003A1	FAM006670		Helsinki	Helsinki		YES	YES	YES	17.2	Male	A4
VILLAF000001	Afghanistan	Village_Dogs	SAMN29845227	SRR20326651	FAM004120	8257		Cornell	Uppsala	Afghanistan	YES	YES	YES	19.02	Female	A1
VILLAF000002	Afghanistan	Village_Dogs	SAMN29845228	SRR20326640	FAM004121	8264		Cornell	Uppsala	Afghanistan	YES	YES	YES	21.95	Female	A1
VILLAF000003	Afghanistan	Village_Dogs	SAMN29845229	SRR20326308	FAM004122	8316		Cornell	Uppsala	Afghanistan	YES	YES	YES	20.29	Male	A1
VILLAK000001	Alaska	Village_Dogs	SAMN29845230	SRR20326297	FAM007429	8277		Cornell	Uppsala	Alaska	YES	YES	YES	21.91	Male	A2
VILLAK000002	Alaska	Village_Dogs	SAMN29845231	SRR20326286	FAM007430	8278		Cornell	Uppsala	Alaska	YES	YES	YES	22.23	Female	A1
VILLAK000003	Alaska	Village_Dogs	SAMN29845232	SRR20326628	FAM007431	8279		Cornell	Uppsala	Alaska	YES	YES	YES	19.9	Male	A1
VILLAZ000001	Azerbaijan	Village_Dogs	SAMN29845595	SRR20326432	FAM004001	ZTD16061298		RIT	Michigan	Baku	YES	YES	YES	19.77	Male	A1
VILLAZ000002	Azerbaijan	Village_Dogs	SAMN29845596	SRR20326431	FAM004002	ZTD16061299		RIT	Michigan	Baku	YES	YES	YES	19.84	Male	A1
VILLAZ000003	Azerbaijan	Village_Dogs	SAMN29845597	SRR20326430	FAM004003	ZTD16061300		RIT	Michigan	Baku	YES	YES	YES	19.66	Male	A1
VILLAZ000004	Azerbaijan	Village_Dogs	SAMN29845598	SRR20326429	FAM004007	ZTD16061307		RIT	Michigan	Baku	YES	YES	YES	17.97	Female	A1
VILLAZ000005	Azerbaijan	Village_Dogs	SAMN29845599	SRR20326428	FAM004008	ZTD16061713		RIT	Michigan	Baku	YES	YES	YES	24.17	Male	B1
VILLAZ000006	Azerbaijan	Village_Dogs	SAMN29845600	SRR20326427	FAM004009	ZTD16061303		RIT	Michigan	Baku	YES	YES	YES	18.86	Female	B1
VILLAZ000007	Azerbaijan	Village_Dogs	SAMN29845601	SRR20326426	FAM004010	ZTD16061304		RIT	Michigan	Baku	YES	YES	YES	19.13	Female	B1
VILLBG000001	Bulgaria	Village_Dogs	SAMN29845233	SRR20326617	FAM007837	BUL7		Cornell	Uppsala	Bulgaria	YES	YES	YES	15.93	Female	B1
VILLBG000002	Bulgaria	Village_Dogs	SAMN29845234	SRR20326606	FAM007838	BUL10		Cornell	Uppsala	Bulgaria	YES	YES	YES	14.48	Female	A1
VILLBG000003	Bulgaria	Village_Dogs	SAMN29845235	SRR20326433	FAM007839	BUL11		Cornell	Uppsala	Bulgaria	NO	NO	NO	9.34	Female	NotApplicable
VILLBZ000001	Belize	Village_Dogs	SAMN29845236	SRR20326422	FAM008004	8233		Cornell	Uppsala	Belize	YES	YES	YES	20.4	Male	B1
VILLBZ000002	Belize	Village_Dogs	SAMN29845237	SRR20326539	FAM008005	8234		Cornell	Uppsala	Belize	YES	YES	YES	17.45	Male	B1
VILLBZ000003	Belize	Village_Dogs	SAMN29845238	SRR20326528	FAM008006	8235		Cornell	Uppsala	Belize	YES	YES	YES	19.61	Male	A1
VILLCG000001	Congo	Village_Dogs	SAMN29845239	SRR20326517	FAM006045	DRC5		Cornell	Uppsala	Congo	YES	YES	YES	20.6	Male	A1
VILLCG000002	Congo	Village_Dogs	SAMN29845240	SRR20326283	FAM006046	DRC3		Cornell	Uppsala	Congo	YES	YES	YES	17.77	Male	A1
VILLCG000003	Congo	Village_Dogs	SAMN29845241	SRR20326282	FAM006047	DRC10		Cornell	Uppsala	Congo	YES	YES	YES	16.83	Female	A1
VILLCG000004	Congo	Village_Dogs	SAMN29845242	SRR20326281	FAM006048	DRC34		Cornell	Uppsala	Congo	YES	YES	YES	23.35	Male	A1
VILLCG000005	Congo	Village_Dogs	SAMN29845243	SRR20326280	FAM006049	DRC42		Cornell	Uppsala	Congo	YES	YES	YES	17.5	Male	A1
VILLCG000006	Congo	Village_Dogs	SAMN29845244	SRR20326279	FAM006050	DRC43		Cornell	Uppsala	Congo	YES	YES	YES	18.85	Female	A1
VILLCG000007	Congo	Village_Dogs	SAMN29845245	SRR20326277	FAM006051	DRC113		Cornell	Uppsala	Congo	YES	YES	YES	18.08	Female	A1
VILLCG000008	Congo	Village_Dogs	SAMN29845246	SRR20326276	FAM006052	DRC117		Cornell	Uppsala	Congo	YES	YES	YES	18.6	Male	A1
VILLCG000009	Congo	Village_Dogs	SAMN29845247	SRR20326275	FAM006053	DRC132		Cornell	Uppsala	Congo	YES	YES	YES	18.25	Female	A1
VILLCG000010	Congo	Village_Dogs	SAMN29845602	SRR20326425	FAM006019	yp160817-011		RIT	Michigan		YES	YES	YES	19.27	Female	A1
VILLCG000011	Congo	Village_Dogs	SAMN29845603	SRR20326424	FAM006020	yp160817-012		RIT	Michigan		YES	YES	YES	20.73	Female	A1
VILLCG000012	Congo	Village_Dogs	SAMN29845604	SRR20326423	FAM006021	yp160817-013		RIT	Michigan		YES	YES	YES	18.95	Female	A1
VILLCG000013	Congo	Village_Dogs	SAMN29845605	SRR20326421	FAM006022	yp160817-014		RIT	Michigan		YES	YES	YES	20.57	Female	A1
VILLCG000014	Congo	Village_Dogs	SAMN29845606	SRR20326420	FAM006023	yp160817-015		RIT	Michigan		YES	YES	YES	19.29	Female	C2
VILLCG000015	Congo	Village_Dogs	SAMN29845607	SRR20326419	FAM006024	yp160817-016		RIT	Michigan		YES	YES	YES	20.46	Male	A1
VILLCG000016	Congo	Village_Dogs	SAMN29845608	SRR20326418	FAM006025	yp160817-017		RIT	Michigan		YES	YES	YES	19.92	Female	A1
VILLCN000001	China	Village_Dogs	SAMN29845360	SRR20326246	FAM000189	YP170214-001		KIZ	Michigan	Hunan China	YES	YES	NO	19.71	Female	A2
VILLCN000002	China	Village_Dogs	SAMN29845361	SRR20326245	FAM000190	YP170214-002		KIZ	Michigan	Hunan China	YES	YES	YES	18.3	Male	A1
VILLCN000003	China	Village_Dogs	SAMN29845362	SRR20326244	FAM000191	YP170214-003		KIZ	Michigan	Hunan China	YES	YES	YES	20.9	Male	A2
VILLCN000004	China	Village_Dogs	SAMN29845363	SRR20326243	FAM000192	YP170214-005		KIZ	Michigan	Hubei China	YES	YES	YES	19.95	Male	A1
VILLCN000005	China	Village_Dogs	SAMN29845364	SRR20326242	FAM000193	YP170214-006		KIZ	Michigan	Hubei China	YES	YES	YES	21.67	Male	A1
VILLCN000006	China	Village_Dogs	SAMN29845365	SRR20326689	FAM000194	YP170214-007		KIZ	Michigan	Hubei China	YES	YES	YES	18.89	Male	A2
VILLCN000007	China	Village_Dogs	SAMN29845366	SRR20326688	FAM000195	YPi3803		KIZ	Michigan	Hubei China	YES	YES	YES	16.17	Male	A1
VILLCN000008	China	Village_Dogs	SAMN29845367	SRR20326687	FAM000196	YPi3720		KIZ	Michigan	Hubei China	YES	YES	YES	18	Female	A1
VILLCN000009	China	Village_Dogs	SAMN29845368	SRR20326686	FAM000197	YPi3602		KIZ	Michigan	Hubei China	YES	YES	YES	16.23	Female	B1
VILLCN000010	China	Village_Dogs	SAMN29845369	SRR20326685	FAM000001	YPi2610		KIZ	Michigan	Anqing Anhui	YES	NO	NO	19.47	Female	NotApplicable
VILLCN000011	China	Village_Dogs	SAMN29845370	SRR20326684	FAM000002	YPi2611		KIZ	Michigan	Anqing Anhui	YES	YES	NO	21.63	Male	A1
VILLCN000012	China	Village_Dogs	SAMN29845371	SRR20326683	FAM000003	YPi2574		KIZ	Michigan	Anqing Anhui	YES	YES	NO	24.87	Female	A1
VILLCN000013	China	Village_Dogs	SAMN29845372	SRR20326682	FAM000004	YPi2575		KIZ	Michigan	Anqing Anhui	YES	YES	NO	26.54	Male	A1
VILLCN000014	China	Village_Dogs	SAMN29845373	SRR20326681	FAM000005	YPi2576		KIZ	Michigan	Anqing Anhui	YES	YES	NO	20.35	Male	A1
VILLCN000015	China	Village_Dogs	SAMN29845374	SRR20326680	FAM000006	YPi2729		KIZ	Michigan	Huainan Anhui	YES	NO	NO	21.89	Female	NotApplicable
VILLCN000016	China	Village_Dogs	SAMN29845375	SRR20326678	FAM000007	YPi2731		KIZ	Michigan	Huainan Anhui	YES	YES	NO	21.3	Male	B1
VILLCN000017	China	Village_Dogs	SAMN29845376	SRR20326677	FAM000009	YPi2772		KIZ	Michigan	Huangshan City Anhui	YES	NO	NO	18.72	Female	NotApplicable
VILLCN000018	China	Village_Dogs	SAMN29845377	SRR20326676	FAM000010	YPi2616		KIZ	Michigan	Huangshan City Anhui	YES	YES	NO	20.85	Female	A1
VILLCN000019	China	Village_Dogs	SAMN29845378	SRR20326675	FAM000011	YPi2657		KIZ	Michigan	Huangshan City Anhui	YES	YES	NO	21.5	Male	A1
VILLCN000020	China	Village_Dogs	SAMN29845379	SRR20326674	FAM000012	YPi2771		KIZ	Michigan	Huangshan City Anhui	YES	YES	YES	20.1	Female	A1
VILLCN000021	China	Village_Dogs	SAMN29845380	SRR20326673	FAM000013	YPi3474		KIZ	Michigan	Sanming Fujian	YES	YES	YES	18.99	Male	A2
VILLCN000022	China	Village_Dogs	SAMN29845381	SRR20326672	FAM000014	YPi3475		KIZ	Michigan	Sanming Fujian	YES	NO	NO	21.89	Male	NotApplicable
VILLCN000023	China	Village_Dogs	SAMN29845382	SRR20326671	FAM000015	YPi3477		KIZ	Michigan	Sanming Fujian	YES	YES	YES	20.38	Female	A2
VILLCN000024	China	Village_Dogs	SAMN29845383	SRR20326670	FAM000017	YPi3482		KIZ	Michigan	Sanming Fujian	YES	NO	NO	21.09	Male	NotApplicable
VILLCN000025	China	Village_Dogs	SAMN29845384	SRR20326572	FAM000018	YPi3476		KIZ	Michigan	Sanming Fujian	YES	YES	NO	20.77	Female	A4
VILLCN000026	China	Village_Dogs	SAMN29845385	SRR20326570	FAM000019	YPi3479		KIZ	Michigan	Sanming Fujian	YES	YES	NO	20.09	Male	A2
VILLCN000027	China	Village_Dogs	SAMN29845386	SRR20326569	FAM000020	YPi3451		KIZ	Michigan	Sanming Fujian	YES	YES	NO	19.95	Female	A2
VILLCN000028	China	Village_Dogs	SAMN29845387	SRR20326568	FAM000021	YPi3452		KIZ	Michigan	Sanming Fujian	YES	YES	YES	21.48	Male	A2
VILLCN000029	China	Village_Dogs	SAMN29845388	SRR20326567	FAM000022	YPi3453		KIZ	Michigan	Sanming Fujian	YES	NO	NO	20.75	Female	NotApplicable
VILLCN000030	China	Village_Dogs	SAMN29845389	SRR20326566	FAM000023	YPi3455		KIZ	Michigan	Sanming Fujian	YES	YES	NO	20.74	Female	A1
VILLCN000031	China	Village_Dogs	SAMN29845390	SRR20326565	FAM000024	YPi3456		KIZ	Michigan	Sanming Fujian	YES	YES	NO	20.93	Female	A2
VILLCN000032	China	Village_Dogs	SAMN29845391	SRR20326564	FAM000025	YPi3457		KIZ	Michigan	Sanming Fujian	YES	YES	YES	19.52	Male	A2
VILLCN000033	China	Village_Dogs	SAMN29845392	SRR20326563	FAM000026	YPi3458		KIZ	Michigan	Sanming Fujian	YES	NO	NO	19.66	Female	NotApplicable
VILLCN000034	China	Village_Dogs	SAMN29845393	SRR20326562	FAM000027	YP10348		KIZ	Michigan	Tianshui Gansu	YES	YES	YES	18.66	Male	A5
VILLCN000035	China	Village_Dogs	SAMN29845394	SRR20326561	FAM000028	YP10349		KIZ	Michigan	Tianshui Gansu	YES	YES	YES	18.55	Female	C1
VILLCN000036	China	Village_Dogs	SAMN29845395	SRR20326558	FAM000029	YP10352		KIZ	Michigan	Tianshui Gansu	YES	YES	YES	17.12	Female	A2
VILLCN000037	China	Village_Dogs	SAMN29845396	SRR20326557	FAM000030	YP10354		KIZ	Michigan	Tianshui Gansu	YES	YES	YES	19.7	Female	A2
VILLCN000038	China	Village_Dogs	SAMN29845397	SRR20326556	FAM000031	YP10355		KIZ	Michigan	Tianshui Gansu	YES	YES	YES	22.27	Female	A1
VILLCN000039	China	Village_Dogs	SAMN29845398	SRR20326555	FAM000032	YP10356		KIZ	Michigan	Tianshui Gansu	YES	YES	YES	17.98	Female	A5
VILLCN000040	China	Village_Dogs	SAMN29845399	SRR20326554	FAM000033	YP10358		KIZ	Michigan	Tianshui Gansu	YES	YES	YES	18.25	Female	A5
VILLCN000041	China	Village_Dogs	SAMN29845400	SRR20326553	FAM000034	YP10359		KIZ	Michigan	Tianshui Gansu	NO	NO	NO	17.81	Female	NotApplicable
VILLCN000042	China	Village_Dogs	SAMN29845401	SRR20326552	FAM000035	YP10362		KIZ	Michigan	Tianshui Gansu	YES	YES	YES	19.79	Female	B1
VILLCN000043	China	Village_Dogs	SAMN29845402	SRR20326551	FAM000036	YPi3442		KIZ	Michigan	Mei Zhou City Guangdong	YES	NO	NO	21.92	Female	NotApplicable
VILLCN000044	China	Village_Dogs	SAMN29845403	SRR20326550	FAM000037	YPi3443		KIZ	Michigan	Mei Zhou City Guangdong	YES	YES	NO	19.44	Female	A2
VILLCN000045	China	Village_Dogs	SAMN29845404	SRR20326549	FAM000038	YPi3428		KIZ	Michigan	Mei Zhou City Guangdong	YES	NO	NO	21.67	Female	NotApplicable
VILLCN000046	China	Village_Dogs	SAMN29845405	SRR20326547	FAM000039	YPi3397		KIZ	Michigan	Mei Zhou City Guangdong	YES	YES	YES	20.03	Female	A5
VILLCN000047	China	Village_Dogs	SAMN29845406	SRR20326546	FAM000041	YPi3398		KIZ	Michigan	Mei Zhou City Guangdong	YES	YES	NO	20.71	Male	A1
VILLCN000048	China	Village_Dogs	SAMN29845407	SRR20326545	FAM000042	YPi3400		KIZ	Michigan	Mei Zhou City Guangdong	YES	YES	NO	20.41	Male	B1
VILLCN000049	China	Village_Dogs	SAMN29845408	SRR20326544	FAM000043	YPi3401		KIZ	Michigan	Mei Zhou City Guangdong	YES	YES	NO	20.68	Male	A1
VILLCN000050	China	Village_Dogs	SAMN29845409	SRR20326543	FAM000044	YPi3402		KIZ	Michigan	Mei Zhou City Guangdong	YES	YES	NO	20.95	Female	A2
VILLCN000051	China	Village_Dogs	SAMN29845410	SRR20326542	FAM000045	YPi3427		KIZ	Michigan	Mei Zhou City Guangdong	YES	YES	YES	21.47	Female	C1
VILLCN000052	China	Village_Dogs	SAMN29845411	SRR20326541	FAM000046	YPi3419		KIZ	Michigan	Mei Zhou City Guangdong	YES	YES	NO	19.53	Female	A5
VILLCN000053	China	Village_Dogs	SAMN29845412	SRR20326380	FAM000047	YPi3422		KIZ	Michigan	Mei Zhou City Guangdong	YES	YES	NO	20.48	Female	A2
VILLCN000054	China	Village_Dogs	SAMN29845413	SRR20326379	FAM000048	YPi3424		KIZ	Michigan	Mei Zhou City Guangdong	YES	YES	NO	19.86	Female	A2
VILLCN000055	China	Village_Dogs	SAMN29845414	SRR20326378	FAM000049	YPi3620		KIZ	Michigan	Hechi City Guangxi	YES	YES	YES	20.19	Male	A2
VILLCN000056	China	Village_Dogs	SAMN29845415	SRR20326376	FAM000050	YPi3254		KIZ	Michigan	Laibin Guangxi	YES	YES	YES	20.31	Male	A2
VILLCN000057	China	Village_Dogs	SAMN29845416	SRR20326375	FAM000051	YPi3255		KIZ	Michigan	Laibin Guangxi	YES	YES	YES	19.13	Male	A2
VILLCN000058	China	Village_Dogs	SAMN29845417	SRR20326374	FAM000053	YPi3257		KIZ	Michigan	Laibin Guangxi	YES	YES	YES	19.91	Male	A2
VILLCN000059	China	Village_Dogs	SAMN29845418	SRR20326373	FAM000054	YPi3259		KIZ	Michigan	Laibin Guangxi	YES	YES	YES	18.59	Female	A5
VILLCN000060	China	Village_Dogs	SAMN29845419	SRR20326372	FAM000055	YPi3260		KIZ	Michigan	Laibin Guangxi	YES	YES	NO	19.17	Male	B1
VILLCN000061	China	Village_Dogs	SAMN29845420	SRR20326371	FAM000056	YPi3212		KIZ	Michigan	Laibin Guangxi	YES	NO	NO	18.59	Male	NotApplicable
VILLCN000062	China	Village_Dogs	SAMN29845421	SRR20326370	FAM000057	YPi3213		KIZ	Michigan	Laibin Guangxi	YES	YES	NO	25.42	Female	C1
VILLCN000063	China	Village_Dogs	SAMN29845422	SRR20326369	FAM000058	YPi3264		KIZ	Michigan	Wuzhou Guangxi	YES	YES	NO	20.43	Male	A2
VILLCN000064	China	Village_Dogs	SAMN29845423	SRR20326368	FAM000059	YPi3261		KIZ	Michigan	Wuzhou Guangxi	YES	YES	YES	19.99	Male	B1
VILLCN000065	China	Village_Dogs	SAMN29845424	SRR20326367	FAM000060	YPi3262		KIZ	Michigan	Wuzhou Guangxi	YES	YES	YES	19.54	Male	A1
VILLCN000066	China	Village_Dogs	SAMN29845425	SRR20326365	FAM000061	YPi3309		KIZ	Michigan	Wuzhou Guangxi	YES	YES	YES	19.54	Female	B1
VILLCN000067	China	Village_Dogs	SAMN29845426	SRR20326364	FAM000062	YPi2701		KIZ	Michigan	Tongren City Guizhou	YES	NO	NO	22.31	Female	NotApplicable
VILLCN000068	China	Village_Dogs	SAMN29845427	SRR20326363	FAM000063	YPi0261		KIZ	Michigan	XingRen Guizhou	YES	YES	YES	22.71	Male	A2
VILLCN000069	China	Village_Dogs	SAMN29845428	SRR20326362	FAM000064	YPi0262		KIZ	Michigan	XingRen Guizhou	YES	YES	YES	18.21	Female	A5
VILLCN000070	China	Village_Dogs	SAMN29845429	SRR20326361	FAM000066	YPi0266		KIZ	Michigan	XingRen Guizhou	YES	YES	YES	19.04	Female	A1
VILLCN000071	China	Village_Dogs	SAMN29845430	SRR20326360	FAM000067	YPi0268		KIZ	Michigan	XingRen Guizhou	YES	YES	YES	21.45	Female	A2
VILLCN000072	China	Village_Dogs	SAMN29845431	SRR20326359	FAM000068	YPi0269		KIZ	Michigan	XingRen Guizhou	YES	YES	YES	18.96	Male	A5
VILLCN000073	China	Village_Dogs	SAMN29845432	SRR20326358	FAM000069	YPi0270		KIZ	Michigan	XingRen Guizhou	YES	YES	YES	17.8	Male	A3
VILLCN000074	China	Village_Dogs	SAMN29845433	SRR20326357	FAM000070	YPi0274		KIZ	Michigan	XingRen Guizhou	YES	YES	YES	18.5	Male	C2
VILLCN000075	China	Village_Dogs	SAMN29845434	SRR20326356	FAM000071	YPi13		KIZ	Michigan	Chengde City Hebei	YES	YES	YES	18.42	Female	B1
VILLCN000076	China	Village_Dogs	SAMN29845435	SRR20326354	FAM000072	YPi27		KIZ	Michigan	Chengde City Hebei	NO	NO	NO	20.23	Male	NotApplicable
VILLCN000077	China	Village_Dogs	SAMN29845436	SRR20326353	FAM000073	YPi28		KIZ	Michigan	Chengde City Hebei	YES	YES	YES	17.74	Female	B1
VILLCN000078	China	Village_Dogs	SAMN29845437	SRR20326352	FAM000074	YPi41		KIZ	Michigan	Chengde City Hebei	YES	YES	YES	18.75	Male	C1
VILLCN000079	China	Village_Dogs	SAMN29845438	SRR20326351	FAM000075	YPi44		KIZ	Michigan	Chengde City Hebei	YES	YES	YES	19.81	Male	A1
VILLCN000080	China	Village_Dogs	SAMN29845439	SRR20326350	FAM000076	ypi486		KIZ	Michigan	Chengde City Hebei	YES	YES	YES	17.69	Female	C1
VILLCN000081	China	Village_Dogs	SAMN29845440	SRR20326349	FAM000077	ypi490		KIZ	Michigan	Chengde City Hebei	YES	YES	YES	22.27	Male	A1
VILLCN000082	China	Village_Dogs	SAMN29845441	SRR20326476	FAM000079	YPi2425		KIZ	Michigan	Enshi Hubei	YES	NO	NO	20.42	Female	NotApplicable
VILLCN000083	China	Village_Dogs	SAMN29845442	SRR20326475	FAM000080	YPi2431		KIZ	Michigan	Lichuan Hubei	YES	NO	NO	21.48	Female	NotApplicable
VILLCN000084	China	Village_Dogs	SAMN29845443	SRR20326474	FAM000081	YPi2452		KIZ	Michigan	Shennongjia Hubei	YES	YES	NO	21.2	Male	A2
VILLCN000085	China	Village_Dogs	SAMN29845444	SRR20326473	FAM000082	YPi3349		KIZ	Michigan	Chenzhou Hunan	YES	NO	NO	22.04	Male	NotApplicable
VILLCN000086	China	Village_Dogs	SAMN29845445	SRR20326471	FAM000083	YPi3350		KIZ	Michigan	Chenzhou Hunan	YES	YES	NO	23.85	Male	A2
VILLCN000087	China	Village_Dogs	SAMN29845446	SRR20326470	FAM000084	YPi3352		KIZ	Michigan	Chenzhou Hunan	YES	YES	YES	21.03	Male	A1
VILLCN000088	China	Village_Dogs	SAMN29845447	SRR20326469	FAM000085	YPi3360		KIZ	Michigan	Chenzhou Hunan	YES	YES	YES	22.31	Male	B1
VILLCN000089	China	Village_Dogs	SAMN29845448	SRR20326468	FAM000086	YPi3361		KIZ	Michigan	Chenzhou Hunan	YES	YES	NO	22.5	Male	B2
VILLCN000090	China	Village_Dogs	SAMN29845449	SRR20326467	FAM000087	YPi3347		KIZ	Michigan	Chenzhou Hunan	YES	YES	YES	20.32	Male	A1
VILLCN000091	China	Village_Dogs	SAMN29845450	SRR20326466	FAM000089	YPi3351		KIZ	Michigan	Chenzhou Hunan	YES	YES	YES	20.43	Male	B2
VILLCN000092	China	Village_Dogs	SAMN29845451	SRR20326465	FAM000090	YPi3353		KIZ	Michigan	Chenzhou Hunan	YES	YES	YES	21.76	Male	A2
VILLCN000093	China	Village_Dogs	SAMN29845452	SRR20326464	FAM000091	YPi3345		KIZ	Michigan	Chenzhou Hunan	YES	YES	YES	21.03	Male	B1
VILLCN000094	China	Village_Dogs	SAMN29845453	SRR20326463	FAM000092	YPi3354		KIZ	Michigan	Chenzhou Hunan	YES	YES	NO	20.05	Male	A1
VILLCN000095	China	Village_Dogs	SAMN29845454	SRR20326462	FAM000093	YPi3356		KIZ	Michigan	Chenzhou Hunan	YES	NO	NO	20.32	Female	NotApplicable
VILLCN000096	China	Village_Dogs	SAMN29845455	SRR20326460	FAM000094	YPi3358		KIZ	Michigan	Chenzhou Hunan	YES	NO	NO	20.7	Male	NotApplicable
VILLCN000097	China	Village_Dogs	SAMN29845456	SRR20326459	FAM000095	YPi3359		KIZ	Michigan	Chenzhou Hunan	YES	YES	NO	20.98	Male	C1
VILLCN000098	China	Village_Dogs	SAMN29845457	SRR20326458	FAM000096	YPi3312		KIZ	Michigan	Chenzhou Hunan	YES	NO	NO	19.98	Female	NotApplicable
VILLCN000099	China	Village_Dogs	SAMN29845458	SRR20326457	FAM000097	YPi2718		KIZ	Michigan	Ji'an Jiangxi	YES	YES	NO	20.76	Male	A2
VILLCN000100	China	Village_Dogs	SAMN29845459	SRR20326456	FAM000098	YPi2518		KIZ	Michigan	Pingxiang Jiangxi	YES	YES	NO	21.47	Male	B1
VILLCN000101	China	Village_Dogs	SAMN29845460	SRR20326455	FAM000099	YPi2502		KIZ	Michigan	Pingxiang Jiangxi	YES	NO	NO	21.67	Male	NotApplicable
VILLCN000102	China	Village_Dogs	SAMN29845461	SRR20326454	FAM000100	YPi3521		KIZ	Michigan	Shangrao Jiangxi	YES	NO	NO	21.49	Male	NotApplicable
VILLCN000103	China	Village_Dogs	SAMN29845462	SRR20326453	FAM000102	YPi3520		KIZ	Michigan	Shangrao Jiangxi	YES	YES	NO	22.68	Male	A1
VILLCN000104	China	Village_Dogs	SAMN29845463	SRR20326452	FAM000103	YPi3547		KIZ	Michigan	Shangrao Jiangxi	YES	YES	NO	20.11	Female	B2
VILLCN000105	China	Village_Dogs	SAMN29845464	SRR20326451	FAM000104	YPi3555		KIZ	Michigan	Shangrao Jiangxi	YES	NO	NO	20.99	Male	NotApplicable
VILLCN000106	China	Village_Dogs	SAMN29845465	SRR20326449	FAM000105	YPi3557		KIZ	Michigan	Shangrao Jiangxi	YES	NO	NO	21.52	Female	NotApplicable
VILLCN000107	China	Village_Dogs	SAMN29845466	SRR20326448	FAM000106	YPi3559		KIZ	Michigan	Shangrao Jiangxi	YES	NO	NO	20.87	Male	NotApplicable
VILLCN000108	China	Village_Dogs	SAMN29845467	SRR20326447	FAM000107	YPi3541		KIZ	Michigan	Shangrao Jiangxi	YES	YES	NO	24.62	Male	A2
VILLCN000109	China	Village_Dogs	SAMN29845468	SRR20326446	FAM000108	YPi3542		KIZ	Michigan	Shangrao Jiangxi	YES	YES	YES	19.56	Male	B1
VILLCN000110	China	Village_Dogs	SAMN29845469	SRR20326445	FAM000109	YPi3543		KIZ	Michigan	Shangrao Jiangxi	YES	NO	NO	21.67	Female	NotApplicable
VILLCN000111	China	Village_Dogs	SAMN29845470	SRR20326348	FAM000110	YPi3548		KIZ	Michigan	Shangrao Jiangxi	YES	YES	NO	19.86	Female	B1
VILLCN000112	China	Village_Dogs	SAMN29845471	SRR20326347	FAM000113	YP5792		KIZ	Michigan	Jinzhong Shanxi	YES	YES	YES	20.47	Male	A1
VILLCN000113	China	Village_Dogs	SAMN29845472	SRR20326346	FAM000119	YP9932		KIZ	Michigan	Xi'an Shaanxi	YES	YES	YES	19.51	Female	A1
VILLCN000114	China	Village_Dogs	SAMN29845473	SRR20326345	FAM000120	YP9934		KIZ	Michigan	Xi'an Shaanxi	YES	YES	YES	17.87	Female	C1
VILLCN000115	China	Village_Dogs	SAMN29845474	SRR20326344	FAM000121	YP9952		KIZ	Michigan	Xi'an Shaanxi	YES	YES	YES	20.71	Male	C1
VILLCN000116	China	Village_Dogs	SAMN29845475	SRR20326342	FAM000122	YP9957		KIZ	Michigan	Xi'an Shaanxi	YES	YES	YES	22.68	Female	C1
VILLCN000117	China	Village_Dogs	SAMN29845476	SRR20326341	FAM000123	YP9971		KIZ	Michigan	Xi'an Shaanxi	YES	YES	YES	19.94	Male	A1
VILLCN000118	China	Village_Dogs	SAMN29845477	SRR20326340	FAM000124	YP9973		KIZ	Michigan	Xi'an Shaanxi	YES	YES	YES	26.51	Male	A1
VILLCN000119	China	Village_Dogs	SAMN29845478	SRR20326339	FAM000125	YP9986		KIZ	Michigan	Xi'an Shaanxi	YES	YES	YES	20	Male	C1
VILLCN000120	China	Village_Dogs	SAMN29845479	SRR20326338	FAM000126	YP9988		KIZ	Michigan	Xi'an Shaanxi	YES	YES	YES	19.07	Female	B1
VILLCN000121	China	Village_Dogs	SAMN29845480	SRR20326337	FAM000127	ypi3922		KIZ	Michigan	Lac Son	YES	YES	YES	19.11	Male	A1
VILLCN000122	China	Village_Dogs	SAMN29845481	SRR20326336	FAM000128	ypi3926		KIZ	Michigan	Lac Son Szechwan	NO	NO	NO	18.9	Male	NotApplicable
VILLCN000123	China	Village_Dogs	SAMN29845482	SRR20326335	FAM000129	ypi3927		KIZ	Michigan	Lac Son Szechwan	YES	YES	YES	19.22	Male	A1
VILLCN000124	China	Village_Dogs	SAMN29845483	SRR20326334	FAM000130	ypi3928		KIZ	Michigan	Lac Son Szechwan	YES	YES	YES	19.49	Male	B1
VILLCN000125	China	Village_Dogs	SAMN29845484	SRR20326333	FAM000131	YP5705		KIZ	Michigan	Ya'an Szechwan	YES	YES	YES	23.84	Male	A2
VILLCN000126	China	Village_Dogs	SAMN29845485	SRR20326331	FAM000132	YP5706		KIZ	Michigan	Ya'an Szechwan	YES	YES	YES	18.81	Male	A2
VILLCN000127	China	Village_Dogs	SAMN29845486	SRR20326330	FAM000133	YP5707		KIZ	Michigan	Ya'an Szechwan	NO	NO	NO	20.31	Female	NotApplicable
VILLCN000128	China	Village_Dogs	SAMN29845487	SRR20326329	FAM000134	YP5712		KIZ	Michigan	Ya'an Szechwan	YES	YES	YES	18.28	Male	A2
VILLCN000129	China	Village_Dogs	SAMN29845488	SRR20326328	FAM000135	YP5717		KIZ	Michigan	Ya'an Szechwan	YES	YES	YES	18.8	Male	A1
VILLCN000130	China	Village_Dogs	SAMN29845489	SRR20326327	FAM000136	YP5721		KIZ	Michigan	Ya'an Szechwan	YES	YES	YES	18.62	Male	A2
VILLCN000131	China	Village_Dogs	SAMN29845490	SRR20326326	FAM000137	YP5723		KIZ	Michigan	Ya'an Szechwan	YES	YES	YES	19.91	Female	A1
VILLCN000132	China	Village_Dogs	SAMN29845491	SRR20326325	FAM000138	YP5730		KIZ	Michigan	Ya'an Szechwan	YES	YES	YES	18.54	Female	A1
VILLCN000133	China	Village_Dogs	SAMN29845492	SRR20326324	FAM000139	YP5734		KIZ	Michigan	Ya'an Szechwan	YES	YES	YES	19.7	Male	A1
VILLCN000134	China	Village_Dogs	SAMN29845493	SRR20326323	FAM000140	YP5738		KIZ	Michigan	Ya'an Szechwan	YES	YES	YES	19.55	Male	A1
VILLCN000135	China	Village_Dogs	SAMN29845494	SRR20326322	FAM000141	YP5739		KIZ	Michigan	Ya'an Szechwan	YES	YES	YES	19.29	Male	A1
VILLCN000136	China	Village_Dogs	SAMN29845495	SRR20326319	FAM000142	YP5743		KIZ	Michigan	Ya'an Szechwan	YES	YES	YES	20.03	Male	A1
VILLCN000137	China	Village_Dogs	SAMN29845496	SRR20326318	FAM000143	YP5744		KIZ	Michigan	Ya'an Szechwan	YES	YES	YES	17.86	Female	A1
VILLCN000138	China	Village_Dogs	SAMN29845497	SRR20326317	FAM000144	YP5957		KIZ	Michigan	Xi'an Shaanxi	YES	YES	YES	19.2	Female	A1
VILLCN000139	China	Village_Dogs	SAMN29845498	SRR20326669	FAM000152	YPi5029		KIZ	Michigan	Dulongjiang Township Yunnan	YES	YES	YES	20.8	Male	A1
VILLCN000140	China	Village_Dogs	SAMN29845499	SRR20326668	FAM000153	ypi5032		KIZ	Michigan	Dulongjiang Township Yunnan	YES	YES	NO	19.31	Male	A1
VILLCN000141	China	Village_Dogs	SAMN29845500	SRR20326667	FAM000154	YP5691		KIZ	Michigan	Ruili Yunnan	NO	NO	NO	14.1	Female	NotApplicable
VILLCN000142	China	Village_Dogs	SAMN29845501	SRR20326666	FAM000155	YPi2757		KIZ	Michigan	Wenshan Yunnan	YES	YES	NO	21.32	Male	A2
VILLCN000143	China	Village_Dogs	SAMN29845502	SRR20326665	FAM000156	YPi2759		KIZ	Michigan	Wenshan Yunnan	YES	YES	YES	19.61	Male	A2
VILLCN000144	China	Village_Dogs	SAMN29845503	SRR20326664	FAM000158	YP5958		KIZ	Michigan	Xi'an Shaanxi	YES	YES	YES	17.98	Female	A2
VILLCN000145	China	Village_Dogs	SAMN29845504	SRR20326663	FAM000159	YP5959		KIZ	Michigan	Xi'an Shaanxi	YES	YES	YES	20.17	Female	A4
VILLCN000146	China	Village_Dogs	SAMN29845505	SRR20326661	FAM000160	YPi2609		KIZ	Michigan	Tongcheng Anhui	YES	YES	NO	23.32	Male	B1
VILLCN000147	China	Village_Dogs	SAMN29845506	SRR20326660	FAM000161	YP10350		KIZ	Michigan	Tianshui Gansu	YES	YES	NO	25.26	Female	A2
VILLCN000148	China	Village_Dogs	SAMN29845507	SRR20326659	FAM000162	YP10360		KIZ	Michigan	Tianshui Gansu	YES	YES	YES	25.88	Female	A1
VILLCN000149	China	Village_Dogs	SAMN29845508	SRR20326658	FAM000163	YPi0264		KIZ	Michigan	XingRen Guizhou	NO	NO	NO	11.12	Male	NotApplicable
VILLCN000150	China	Village_Dogs	SAMN29845509	SRR20326657	FAM000165	YPi2406		KIZ	Michigan	Chongqing Chongqing	NO	NO	NO	10.98	Male	NotApplicable
VILLCN000151	China	Village_Dogs	SAMN29845510	SRR20326656	FAM000166	YPi2432		KIZ	Michigan	Enshi Hubei	NO	NO	NO	10.36	Female	NotApplicable
VILLCN000152	China	Village_Dogs	SAMN29845511	SRR20326655	FAM000170	YP161017-001		KIZ	Michigan	Guyuan Ningxia	YES	YES	YES	29.25	Female	A2
VILLCN000153	China	Village_Dogs	SAMN29845512	SRR20326654	FAM000171	YP161017-002		KIZ	Michigan	Guyuan Ningxia	YES	YES	YES	27.02	Male	A2
VILLCN000154	China	Village_Dogs	SAMN29845513	SRR20326653	FAM000172	YP161017-003		KIZ	Michigan	Guyuan Ningxia	YES	YES	YES	19.6	Female	A2
VILLCR000001	Costa Rica	Village_Dogs	SAMN29845248	SRR20326274	FAM008007	CR6		Cornell	Uppsala	Costa Rica	YES	YES	YES	20.06	Male	B1
VILLCR000002	Costa Rica	Village_Dogs	SAMN29845249	SRR20326273	FAM008008	CR9		Cornell	Uppsala	Costa Rica	YES	YES	YES	20.23	Male	B1
VILLCR000003	Costa Rica	Village_Dogs	SAMN29845250	SRR20326272	FAM008009	CR14		Cornell	Uppsala	Costa Rica	YES	YES	YES	22.73	Male	B1
VILLCU000001	Cuba	Village_Dogs	SAMN29845251	SRR20326271	FAM008014	CU2		Cornell	Uppsala	Cuba	YES	YES	YES	14.08	Female	A1
VILLFJ000001	Fiji	Village_Dogs	SAMN29845252	SRR20326270	FAM009031	FJ04		Cornell	Uppsala	Fiji	YES	YES	YES	18.37	Female	B1
VILLFJ000002	Fiji	Village_Dogs	SAMN29845253	SRR20326269	FAM009032	FJ07		Cornell	Uppsala	Fiji	YES	YES	YES	18.97	Female	B1
VILLFJ000003	Fiji	Village_Dogs	SAMN29845254	SRR20326268	FAM009033	FJ08		Cornell	Uppsala	Fiji	YES	YES	YES	18.04	Female	C2
VILLFJ000004	Fiji	Village_Dogs	SAMN29845255	SRR20326266	FAM009034	FJ18		Cornell	Uppsala	Fiji	YES	YES	YES	19.29	Male	B1
VILLFJ000005	Fiji	Village_Dogs	SAMN29845256	SRR20326265	FAM009035	FJ20		Cornell	Uppsala	Fiji	YES	YES	YES	19.96	Male	A1
VILLFJ000006	Fiji	Village_Dogs	SAMN29845257	SRR20326264	FAM009036	FJ32		Cornell	Uppsala	Fiji	YES	YES	YES	18.66	Male	A1
VILLFJ000007	Fiji	Village_Dogs	SAMN29845258	SRR20326263	FAM009037	FJ65		Cornell	Uppsala	Fiji	YES	YES	YES	18.46	Female	A1
VILLFJ000008	Fiji	Village_Dogs	SAMN29845259	SRR20326262	FAM009038	FJ66		Cornell	Uppsala	Fiji	YES	YES	YES	18.5	Male	A1
VILLFJ000009	Fiji	Village_Dogs	SAMN29845260	SRR20326261	FAM009039	FJ84		Cornell	Uppsala	Fiji	YES	YES	YES	20.14	Male	A1
VILLGR000001	Greece	Village_Dogs	SAMN29845261	SRR20326260	FAM007834	GR2		Cornell	Uppsala	Greece	NO	NO	NO	4.23	Male	NotApplicable
VILLGR000002	Greece	Village_Dogs	SAMN29845262	SRR20326259	FAM007835	GR5		Cornell	Uppsala	Greece	NO	NO	NO	5.75	Male	NotApplicable
VILLGR000003	Greece	Village_Dogs	SAMN29845263	SRR20326258	FAM007836	GR12		Cornell	Uppsala	Greece	NO	NO	NO	11.89	Male	NotApplicable
VILLIR000001	Iran	Village_Dogs	SAMN29845514	SRR20326652	FAM004065	ypi2786		KIZ	Michigan	Hormozgan Iran	YES	YES	YES	18.37	Female	A1
VILLIR000002	Iran	Village_Dogs	SAMN29845515	SRR20326650	FAM004066	ypi2787		KIZ	Michigan	Hormozgan Iran	YES	YES	YES	19.66	Male	A1
VILLIR000003	Iran	Village_Dogs	SAMN29845516	SRR20326649	FAM004067	ypi2788		KIZ	Michigan	Hormozgan Iran	YES	YES	YES	19.53	Female	A1
VILLIR000004	Iran	Village_Dogs	SAMN29845517	SRR20326648	FAM004068	ypi2942		KIZ	Michigan	Illam Iran	YES	YES	YES	17.6	Female	B1
VILLIR000005	Iran	Village_Dogs	SAMN29845518	SRR20326647	FAM004069	ypi2943		KIZ	Michigan	Illam Iran	YES	YES	YES	19.78	Male	B1
VILLIR000006	Iran	Village_Dogs	SAMN29845519	SRR20326646	FAM004071	ZTD16061316		KIZ	Michigan	Iran	YES	YES	YES	18.79	Male	B1
VILLIR000007	Iran	Village_Dogs	SAMN29845520	SRR20326645	FAM004070	ypi2797		KIZ	Michigan	Kerman Iran	YES	YES	YES	19.83	Male	C1
VILLIR000008	Iran	Village_Dogs	SAMN29845521	SRR20326644	FAM004079	ypi2829		KIZ	Michigan	Shiraz Iran	YES	YES	YES	19.29	Male	A1
VILLIR000009	Iran	Village_Dogs	SAMN29845522	SRR20326643	FAM004080	ypi2830		KIZ	Michigan	Shiraz Iran	YES	YES	YES	17.66	Female	A1
VILLIR000010	Iran	Village_Dogs	SAMN29845609	SRR20326417	FAM004062	ZTD16061318		RIT	Michigan	Tehran	NO	NO	NO	18	Male	NotApplicable
VILLIR000011	Iran	Village_Dogs	SAMN29845610	SRR20326416	FAM004063	ZTD16061319		RIT	Michigan	Tehran	YES	YES	YES	18.42	Male	B1
VILLIR000012	Iran	Village_Dogs	SAMN29845611	SRR20326415	FAM004064	ZTD16061329		RIT	Michigan	Tehran	YES	YES	YES	20.41	Female	B1
VILLIR000013	Iran	Village_Dogs	SAMN29845612	SRR20326414	FAM004072	ZTD16061317		RIT	Michigan	Tehran	YES	YES	YES	18.77	Female	A1
VILLIR000014	Iran	Village_Dogs	SAMN29845613	SRR20326413	FAM004073	ZTD16061320		RIT	Michigan	Tehran	YES	YES	YES	19.63	Male	B1
VILLIR000015	Iran	Village_Dogs	SAMN29845614	SRR20326540	FAM004074	ZTD16061313		RIT	Michigan	Tehran	YES	YES	YES	19.81	Male	A1
VILLIR000016	Iran	Village_Dogs	SAMN29845615	SRR20326538	FAM004075	ZTD16061315		RIT	Michigan	Tehran	YES	YES	YES	18.6	Female	A1
VILLIR000017	Iran	Village_Dogs	SAMN29845523	SRR20326642	FAM004081	ypi2963		KIZ	Michigan	Zabol Iran	YES	YES	YES	18.78	Male	A1
VILLIR000018	Iran	Village_Dogs	SAMN29845524	SRR20326641	FAM004082	ypi2964		KIZ	Michigan	Zabol Iran	YES	YES	YES	19.76	Male	A1
VILLIR000019	Iran	Village_Dogs	SAMN29845525	SRR20326639	FAM004083	ypi2965		KIZ	Michigan	Zabol Iran	YES	YES	YES	18.47	Female	A1
VILLIR000020	Iran	Village_Dogs	SAMN29845526	SRR20326638	FAM004088	YPi2776		KIZ	Michigan	Iran	YES	YES	YES	26.98	Male	B1
VILLIR000021	Iran	Village_Dogs	SAMN29845527	SRR20326316	FAM004089	YPi2778		KIZ	Michigan	Iran	YES	YES	NO	26.87	Male	B1
VILLIR000022	Iran	Village_Dogs	SAMN29845528	SRR20326315	FAM004090	YPi2791		KIZ	Michigan	Iran	YES	YES	YES	25.92	Female	B1
VILLIR000023	Iran	Village_Dogs	SAMN29845529	SRR20326314	FAM004091	YPi2808		KIZ	Michigan	Iran	YES	YES	YES	25.15	Male	A1
VILLIR000024	Iran	Village_Dogs	SAMN29845530	SRR20326313	FAM004092	YPi2832		KIZ	Michigan	Iran	NO	NO	NO	26.86	Male	NotApplicable
VILLIR000025	Iran	Village_Dogs	SAMN29845531	SRR20326312	FAM004093	YPi2834		KIZ	Michigan	Iran	YES	YES	NO	25.21	Female	A1
VILLIR000026	Iran	Village_Dogs	SAMN29845532	SRR20326311	FAM004094	YPi2875		KIZ	Michigan	Iran	YES	YES	YES	26.15	Male	C2
VILLIR000027	Iran	Village_Dogs	SAMN29845533	SRR20326310	FAM004095	YPi2896		KIZ	Michigan	Iran	NO	NO	NO	25.08	Female	NotApplicable
VILLIR000028	Iran	Village_Dogs	SAMN29845534	SRR20326309	FAM004097	YPi2921		KIZ	Michigan	Iran	YES	YES	YES	22.34	Male	D2
VILLIR000029	Iran	Village_Dogs	SAMN29845535	SRR20326307	FAM004098	YPi2936		KIZ	Michigan	Iran	YES	YES	NO	25.48	Male	B1
VILLIR000030	Iran	Village_Dogs	SAMN29845536	SRR20326306	FAM004099	YPi2944		KIZ	Michigan	Iran	YES	YES	YES	26.44	Male	A1
VILLKE000001	Kenya	Village_Dogs	SAMN29845537	SRR20326305	FAM006000	ypi5034		KIZ	Michigan	Kenya	YES	YES	YES	19.15	Male	B1
VILLKE000002	Kenya	Village_Dogs	SAMN29845538	SRR20326304	FAM006001	ypi5036		KIZ	Michigan	Kenya	YES	YES	YES	22.41	Male	B1
VILLKE000003	Kenya	Village_Dogs	SAMN29845539	SRR20326303	FAM006002	YPi5037		KIZ	Michigan	Kenya	YES	YES	YES	19.63	Female	A1
VILLKE000004	Kenya	Village_Dogs	SAMN29845540	SRR20326302	FAM006003	ypi5039		KIZ	Michigan	Kenya	YES	YES	YES	20.37	Female	A1
VILLKE000005	Kenya	Village_Dogs	SAMN29845541	SRR20326301	FAM006004	ypi5042		KIZ	Michigan	Kenya	YES	YES	YES	20.08	Male	A1
VILLKE000006	Kenya	Village_Dogs	SAMN29845542	SRR20326300	FAM006005	ypi5043		KIZ	Michigan	Kenya	YES	YES	YES	19.38	Male	A1
VILLKE000007	Kenya	Village_Dogs	SAMN29845543	SRR20326299	FAM006006	ypi5045		KIZ	Michigan	Kenya	YES	YES	YES	18.95	Female	A1
VILLKE000008	Kenya	Village_Dogs	SAMN29845544	SRR20326298	FAM006007	ypi5046		KIZ	Michigan	Kenya	YES	YES	YES	19.2	Female	A1
VILLKE000009	Kenya	Village_Dogs	SAMN29845545	SRR20326296	FAM006008	ypi5047		KIZ	Michigan	Kenya	YES	YES	YES	21.05	Female	B1
VILLKE000010	Kenya	Village_Dogs	SAMN29845546	SRR20326295	FAM006009	ypi5051		KIZ	Michigan	Kenya	YES	YES	YES	21.98	Female	A1
VILLKE000011	Kenya	Village_Dogs	SAMN29845547	SRR20326294	FAM006010	YPi5053		KIZ	Michigan	Kenya	YES	YES	YES	21.49	Male	A1
VILLKE000012	Kenya	Village_Dogs	SAMN29845548	SRR20326293	FAM006011	ypi5057		KIZ	Michigan	Kenya	YES	YES	YES	19.3	Male	A1
VILLKE000013	Kenya	Village_Dogs	SAMN29845549	SRR20326292	FAM006012	ypi5058		KIZ	Michigan	Kenya	YES	YES	YES	20.45	Male	A1
VILLKE000014	Kenya	Village_Dogs	SAMN29845550	SRR20326291	FAM006013	YPi5059		KIZ	Michigan	Kenya	YES	YES	YES	17.45	Female	B1
VILLKE000015	Kenya	Village_Dogs	SAMN29845551	SRR20326290	FAM006014	ypi5060		KIZ	Michigan	Kenya	YES	YES	YES	20.72	Male	A1
VILLKE000016	Kenya	Village_Dogs	SAMN29845552	SRR20326289	FAM006015	ypi5062		KIZ	Michigan	Kenya	YES	YES	YES	19.48	Male	A1
VILLKE000017	Kenya	Village_Dogs	SAMN29845553	SRR20326288	FAM006016	YPi5067		KIZ	Michigan	Kenya	YES	YES	YES	18.46	Male	A1
VILLKE000018	Kenya	Village_Dogs	SAMN29845554	SRR20326287	FAM006017	ypi5069		KIZ	Michigan	Kenya	NO	NO	NO	19.02	Male	NotApplicable
VILLKE000019	Kenya	Village_Dogs	SAMN29845555	SRR20326285	FAM006018	ypi5070		KIZ	Michigan	Kenya	YES	YES	YES	20.72	Male	A1
VILLKH000001	Cambodia	Village_Dogs	SAMN29845264	SRR20326257	FAM002055	DAG06		Cornell	Uppsala	Cambodia	YES	YES	YES	18.1	Female	A1
VILLKH000002	Cambodia	Village_Dogs	SAMN29845265	SRR20326255	FAM002056	DAG08		Cornell	Uppsala	Cambodia	YES	YES	YES	15.8	Female	B1
VILLKH000003	Cambodia	Village_Dogs	SAMN29845266	SRR20326254	FAM002057	DAG01		Cornell	Uppsala	Cambodia	YES	YES	YES	20.24	Male	A1
VILLKH000004	Cambodia	Village_Dogs	SAMN29845267	SRR20326253	FAM002058	DAG12		Cornell	Uppsala	Cambodia	YES	YES	YES	16.33	Male	B1
VILLLK000001	Sri Lanka	Village_Dogs	SAMN29845556	SRR20326637	FAM003010	YPi3807		KIZ	Michigan	University of Ruhunam Matara Sri Lanka	YES	YES	YES	23.94	Male	A1
VILLLR000001	Liberia	Village_Dogs	SAMN29845268	SRR20326605	FAM006028	Li1		Cornell	Uppsala	Liberia	YES	YES	YES	19.92	Male	A1
VILLLR000002	Liberia	Village_Dogs	SAMN29845269	SRR20326604	FAM006029	Li4		Cornell	Uppsala	Liberia	YES	YES	YES	18.79	Female	C2
VILLLR000003	Liberia	Village_Dogs	SAMN29845270	SRR20326603	FAM006030	Li6		Cornell	Uppsala	Liberia	YES	YES	YES	18.38	Female	C2
VILLLR000004	Liberia	Village_Dogs	SAMN29845271	SRR20326602	FAM006031	Li12		Cornell	Uppsala	Liberia	YES	YES	YES	18.23	Female	A1
VILLLR000005	Liberia	Village_Dogs	SAMN29845272	SRR20326601	FAM006032	Li16		Cornell	Uppsala	Liberia	YES	YES	YES	20.62	Female	A1
VILLLR000006	Liberia	Village_Dogs	SAMN29845273	SRR20326600	FAM006033	Li17		Cornell	Uppsala	Liberia	YES	YES	YES	17.86	Female	A1
VILLLR000007	Liberia	Village_Dogs	SAMN29845274	SRR20326599	FAM006034	Li27		Cornell	Uppsala	Liberia	YES	YES	YES	19.63	Female	A1
VILLLR000008	Liberia	Village_Dogs	SAMN29845275	SRR20326597	FAM006035	Li35		Cornell	Uppsala	Liberia	YES	YES	YES	20.34	Female	B1
VILLLR000009	Liberia	Village_Dogs	SAMN29845276	SRR20326596	FAM006036	Li36		Cornell	Uppsala	Liberia	YES	YES	YES	20.37	Female	A1
VILLLR000010	Liberia	Village_Dogs	SAMN29845277	SRR20326595	FAM006037	Li48		Cornell	Uppsala	Liberia	YES	YES	YES	20.01	Female	A1
VILLLR000011	Liberia	Village_Dogs	SAMN29845278	SRR20326594	FAM006038	Li47		Cornell	Uppsala	Liberia	YES	YES	YES	23.91	Female	A1
VILLLR000012	Liberia	Village_Dogs	SAMN29845279	SRR20326593	FAM006039	Li51		Cornell	Uppsala	Liberia	YES	YES	YES	17.42	Male	A1
VILLLR000013	Liberia	Village_Dogs	SAMN29845280	SRR20326592	FAM006040	Li63		Cornell	Uppsala	Liberia	YES	YES	YES	19.82	Female	A1
VILLLR000014	Liberia	Village_Dogs	SAMN29845281	SRR20326591	FAM006041	Li64		Cornell	Uppsala	Liberia	YES	YES	YES	21.83	Female	A1
VILLLR000015	Liberia	Village_Dogs	SAMN29845282	SRR20326590	FAM006042	Li65		Cornell	Uppsala	Liberia	YES	YES	YES	19.09	Male	A1
VILLLR000016	Liberia	Village_Dogs	SAMN29845283	SRR20326589	FAM006043	Li82		Cornell	Uppsala	Liberia	YES	YES	YES	20.05	Male	B1
VILLLR000017	Liberia	Village_Dogs	SAMN29845284	SRR20326588	FAM006044	Li84		Cornell	Uppsala	Liberia	YES	YES	YES	19.06	Male	A1
VILLMM000004	Myanmar	Village_Dogs	SAMN29845616	SRR20326537	FAM002015	YP170208-004		RIT	Michigan	thet mon myint (Yezin)	YES	YES	YES	26.35	Female	A1
VILLMM000005	Myanmar	Village_Dogs	SAMN29845617	SRR20326536	FAM002016	YP170208-005		RIT	Michigan	mnoy toe (Yezin)	YES	YES	YES	23.34	Male	A1
VILLMX000001	Mexico	Village_Dogs	SAMN29845285	SRR20326586	FAM008010	Tachito		Cornell	Uppsala	Mexico	NO	NO	NO	12.59	Male	NotApplicable
VILLMX000002	Mexico	Village_Dogs	SAMN29845286	SRR20326585	FAM008011	MX126		Cornell	Uppsala	Mexico	YES	YES	YES	18.94	Female	B1
VILLMX000003	Mexico	Village_Dogs	SAMN29845287	SRR20326584	FAM008012	MX127		Cornell	Uppsala	Mexico	YES	YES	YES	17.37	Female	A1
VILLMX000004	Mexico	Village_Dogs	SAMN29845288	SRR20326583	FAM008013	MX128		Cornell	Uppsala	Mexico	YES	YES	YES	17.06	Female	A1
VILLNP000001	Nepal	Village_Dogs	SAMN29845618	SRR20326535	FAM003000	yp160817-001		RIT	Michigan	Kathmandu	YES	YES	YES	23.48	Male	A1
VILLNP000002	Nepal	Village_Dogs	SAMN29845619	SRR20326534	FAM003001	yp160817-002		RIT	Michigan	Kathmandu	YES	YES	YES	19.57	Male	A6
VILLNP000003	Nepal	Village_Dogs	SAMN29845620	SRR20326533	FAM003002	yp160817-003		RIT	Michigan	Kathmandu	YES	YES	YES	21.46	Male	A2
VILLNP000004	Nepal	Village_Dogs	SAMN29845621	SRR20326532	FAM003004	yp160817-005		RIT	Michigan	Kathmandu	YES	YES	YES	22.04	Male	A6
VILLNP000005	Nepal	Village_Dogs	SAMN29845622	SRR20326531	FAM003005	yp160817-006		RIT	Michigan	Kathmandu	YES	YES	YES	19.13	Female	A1
VILLNP000006	Nepal	Village_Dogs	SAMN29845623	SRR20326530	FAM003007	yp160817-008		RIT	Michigan	Kathmandu	YES	YES	YES	19.27	Male	A1
VILLNP000007	Nepal	Village_Dogs	SAMN29845624	SRR20326529	FAM003008	yp160817-009		RIT	Michigan	Kathmandu	YES	YES	YES	18.87	Female	A2
VILLNP000008	Nepal	Village_Dogs	SAMN29845625	SRR20326527	FAM003009	yp160817-010		RIT	Michigan	Kathmandu	YES	YES	YES	19.57	Male	A2
VILLPE000001	South America	Village_Dogs	SAMN17023483	SRR13376374	FAM006831			Oxford	Michigan		NO	NO	NO	13.02	Female	NotApplicable
VILLPE000002	South America	Village_Dogs	SAMN17023484	SRR13376373	FAM006832			Oxford	Michigan		YES	YES	YES	16.52	Male	B1
VILLPE000003	South America	Village_Dogs	SAMN17023485	SRR13376362	FAM006833			Oxford	Michigan		YES	YES	YES	16.3	Female	A1
VILLPE000004	South America	Village_Dogs	SAMN17023486	SRR13376351	FAM006834			Oxford	Michigan		NO	NO	NO	5.1	Male	NotApplicable
VILLPE000005	South America	Village_Dogs	SAMN17023487	SRR13376341	FAM006835			Oxford	Michigan		NO	NO	NO	13.11	Male	NotApplicable
VILLPE000006	South America	Village_Dogs	SAMN17023488	SRR13376340	FAM006836			Oxford	Michigan		NO	NO	NO	10.01	Male	NotApplicable
VILLPE000007	South America	Village_Dogs	SAMN17023489	SRR13376339	FAM006837			Oxford	Michigan		YES	NO	NO	15.46	Female	NotApplicable
VILLPE000008	South America	Village_Dogs	SAMN17023490	SRR13376338	FAM006838			Oxford	Michigan		YES	YES	YES	15.67	Female	A1
VILLPF000001	French Polynesia	Village_Dogs	SAMN29845289	SRR20326582	FAM009018	FP01		Cornell	Uppsala	French Polynesia	YES	YES	YES	20.06	Male	A1
VILLPF000002	French Polynesia	Village_Dogs	SAMN29845290	SRR20326581	FAM009019	FP77		Cornell	Uppsala	French Polynesia	YES	YES	YES	19.99	Female	B1
VILLPF000003	French Polynesia	Village_Dogs	SAMN29845291	SRR20326580	FAM009020	FP78		Cornell	Uppsala	French Polynesia	YES	YES	YES	17.62	Female	A1
VILLPF000004	French Polynesia	Village_Dogs	SAMN29845292	SRR20326579	FAM009021	FP10		Cornell	Uppsala	French Polynesia	YES	YES	YES	21.02	Female	A1
VILLPF000005	French Polynesia	Village_Dogs	SAMN29845293	SRR20326578	FAM009022	FP13		Cornell	Uppsala	French Polynesia	YES	YES	YES	18.08	Female	A1
VILLPF000006	French Polynesia	Village_Dogs	SAMN29845294	SRR20326577	FAM009023	FP14		Cornell	Uppsala	French Polynesia	YES	YES	YES	18.75	Male	B1
VILLPF000007	French Polynesia	Village_Dogs	SAMN29845295	SRR20326573	FAM009024	FP24		Cornell	Uppsala	French Polynesia	YES	YES	YES	18.47	Male	A1
VILLPF000008	French Polynesia	Village_Dogs	SAMN29845296	SRR20326508	FAM009025	FP31		Cornell	Uppsala	French Polynesia	YES	YES	YES	19.6	Female	A1
VILLPF000009	French Polynesia	Village_Dogs	SAMN29845297	SRR20326507	FAM009026	FP47		Cornell	Uppsala	French Polynesia	YES	YES	YES	17.41	Female	A1
VILLPF000010	French Polynesia	Village_Dogs	SAMN29845298	SRR20326506	FAM009027	FP50		Cornell	Uppsala	French Polynesia	YES	YES	YES	18.46	Male	A1
VILLPF000011	French Polynesia	Village_Dogs	SAMN29845299	SRR20326505	FAM009028	FP58		Cornell	Uppsala	French Polynesia	YES	YES	YES	19.5	Male	A1
VILLPF000012	French Polynesia	Village_Dogs	SAMN29845300	SRR20326504	FAM009029	FP66		Cornell	Uppsala	French Polynesia	YES	YES	YES	17.93	Female	A1
VILLPF000013	French Polynesia	Village_Dogs	SAMN29845301	SRR20326503	FAM009030	FP74		Cornell	Uppsala	French Polynesia	YES	YES	YES	18.2	Female	A1
VILLPH000001	Philippines	Village_Dogs	SAMN29845302	SRR20326502	FAM002059	PH1		Cornell	Uppsala	Philippines	YES	YES	YES	15.23	Female	A1
VILLPH000002	Philippines	Village_Dogs	SAMN29845303	SRR20326501	FAM002060	PH2		Cornell	Uppsala	Philippines	NO	NO	NO	11.09	Male	NotApplicable
VILLTC000001	Turks and Caicos Islands	Village_Dogs	SAMN29845304	SRR20326500	FAM004123	TC2		Cornell	Uppsala	Turks and Caicos Islands	YES	YES	YES	17.74	Male	A1
VILLTH000001	Thailand	Village_Dogs	SAMN29845557	SRR20326636	FAM002000	YPi2046		KIZ	Michigan	Ban Huai Yuak Thailand	YES	NO	NO	21.61	Female	NotApplicable
VILLTH000002	Thailand	Village_Dogs	SAMN29845558	SRR20326635	FAM002001	YPi2047		KIZ	Michigan	Ban Huai Yuak Thailand	YES	YES	NO	22.05	Male	A1
VILLTH000003	Thailand	Village_Dogs	SAMN29845559	SRR20326634	FAM002002	YPi2049		KIZ	Michigan	Ban Mae Sapok Tai Thailand	YES	NO	NO	22.38	Female	NotApplicable
VILLTH000004	Thailand	Village_Dogs	SAMN29845560	SRR20326633	FAM002003	YPi2051		KIZ	Michigan	Ban Mae Sapok Tai Thailand	YES	NO	NO	22.31	Male	NotApplicable
VILLTH000005	Thailand	Village_Dogs	SAMN29845561	SRR20326632	FAM002006	YPi1038		KIZ	Michigan	Th_x0088_nh ph_ H_x0088_ N_i Thailand	YES	YES	YES	19.45	Female	A2
VILLTH000006	Thailand	Village_Dogs	SAMN29845562	SRR20326631	FAM002007	YPi1039		KIZ	Michigan	Th_x0088_nh ph_ H_x0088_ N_i Thailand	YES	YES	YES	18.17	Female	A5
VILLTH000007	Thailand	Village_Dogs	SAMN29845563	SRR20326630	FAM002008	YPi1040		KIZ	Michigan	Th_x0088_nh ph_ H_x0088_ N_i Thailand	NO	NO	NO	20.26	Female	NotApplicable
VILLTH000008	Thailand	Village_Dogs	SAMN29845564	SRR20326629	FAM002009	YPi1041		KIZ	Michigan	Th_x0088_nh ph_ H_x0088_ N_i Thailand	YES	YES	NO	21.12	Female	A2
VILLTH000009	Thailand	Village_Dogs	SAMN29845565	SRR20326627	FAM002010	YPi1043		KIZ	Michigan	Th_x0088_nh ph_ H_x0088_ N_i Thailand	YES	YES	YES	19.76	Female	A5
VILLTH000010	Thailand	Village_Dogs	SAMN29845566	SRR20326626	FAM002011	YPi2044		KIZ	Michigan	Ban Huai Yuak Thailand	NO	NO	NO	8.74	Female	NotApplicable
VILLTJ000001	Tajikistan	Village_Dogs	SAMN29845567	SRR20326625	FAM003500	ypi5073		KIZ	Michigan	Tajikistan	YES	YES	YES	19.32	Male	B1
VILLUZ000001	Uzbekistan	Village_Dogs	SAMN29845626	SRR20326526	FAM003507	ZTD16070633		RIT	Michigan	Tashkent	YES	YES	YES	17.51	Male	A1
VILLUZ000002	Uzbekistan	Village_Dogs	SAMN29845627	SRR20326525	FAM003508	ZTD16061311		RIT	Michigan	Tashkent	YES	YES	YES	19.83	Male	A1
VILLUZ000003	Uzbekistan	Village_Dogs	SAMN29845628	SRR20326524	FAM003509	ZTD16061312		RIT	Michigan	Tashkent	YES	YES	YES	19.95	Male	D2
VILLUZ000004	Uzbekistan	Village_Dogs	SAMN29845629	SRR20326523	FAM003510	ZTD16061308		RIT	Michigan	Tashkent	YES	YES	YES	19.69	Female	B1
[truncated: 77 more rows]

## Sheet: Table S2
Table S2: Samples with high F2 allele sharing with wolves.
Sample	Breed	Total F2 Sites	Shared with Breed Dogs	Shared with Mixed/Other Dogs	Shared with Village Dogs	Shared with Wolves
SAAR000002	Saarloos Wolfdog	21802	10566	222	1395	9619
SAAR000004	Saarloos Wolfdog	13496	9274	4	434	3784
SHIL000001	Shiloh Shepherd	2312	381	3	125	1803
SAAR000003	Saarloos Wolfdog	4014	2300	0	84	1630
SAAR000001	Saarloos Wolfdog	3384	1830	0	83	1471
CZEC000001	Czechoslovakian Wolfdog	2115	801	0	66	1248
CZEC000002	Czechoslovakian Wolfdog	2638	1400	1	88	1149
CZEC000004	Czechoslovakian Wolfdog	2171	976	1	70	1124
CZEC000003	Czechoslovakian Wolfdog	2016	1264	1	26	725
The breed dogs with over 500 F2 alleles shared with wolves are shown. For each dog the total number of F2 alleles, as well as the number that are shared with another breed dog, mixed/other dog, village dog, or wolf, is listed.

## Sheet: Table S3
Table S3. Variation yet to be discovered based on 100 samples per breed.
Breed	Total Samples	Total Nonreference Sites	Total Variable Sites	Average Pairwise Differences (pi)	Average Pairwise Differences Fraction of Callable Sites (pi)	Estimated Nonreferene Sites in 100 individuals	Estimated Fraction of Variants Discovered
Norwegian Lundehund	5	2753581	695528	274250	0.000128	2798615	0.984
Sussex Spaniel	6	3762585	2624026	1.00446e+06	0.0004686	3.95968e+06	0.95
Clumber Spaniel	5	4125200	3169835	1274493	0.0005946	4.38501e+06	0.941
Sealyham Terrier	9	5021143	4456974	1.5774e+06	0.0007359	5.35317e+06	0.938
Leonberger	11	5387538	5016497	1.71109e+06	0.0007983	5.75981e+06	0.935
Bedlington Terrier	7	4461157	3691793	1.36869e+06	0.0006386	4.81965e+06	0.926
Manchester Terrier (Standard)	9	4816416	4152937	1.42622e+06	0.0006654	5203577	0.926
Picardy Shepherd	6	3820949	3117248	1.18933e+06	0.0005549	4.16069e+06	0.918
Collie	13	5017705	4451991	1.47495e+06	0.0006881	5.46999e+06	0.917
German Hound	6	4912184	4320525	1.64106e+06	0.0007656	5.35723e+06	0.917
Broholmer	6	4551797	3884285	1.48599e+06	0.0006933	4.96932e+06	0.916
Appenzeller Sennenhund	14	4486581	3722086	1.16961e+06	0.0005457	4.90032e+06	0.916
Bourbonnais Pointing Dog	7	5306995	4846324	1.79091e+06	0.0008355	5.80734e+06	0.914
Saint Bernard	13	5801133	5470736	1.78292e+06	0.0008318	6.35848e+06	0.912
Petit Basset Griffon Vendeen	11	6126475	5829415	1.93216e+06	0.0009014	6.71849e+06	0.912
Small Munsterlander	11	6396524	6150544	2.03056e+06	0.0009473	7.05134e+06	0.907
Field Spaniel	5	4507562	3740030	1.4593e+06	0.0006808	4.97501e+06	0.906
Norwich Terrier	6	4593652	3854322	1457922	0.0006802	5.07362e+06	0.905
Glen of Imaal Terrier	6	4915609	4324061	1.63403e+06	0.0007623	5.43321e+06	0.905
Bullmastiff	6	4876172	4280313	1.61595e+06	0.0007539	5.38982e+06	0.905
Kai Ken	5	6165163	5689716	2.2375e+06	0.0010439	6823038	0.904
Pyrenean Mastiff	6	5525432	5129106	1.94867e+06	0.0009091	6.11982e+06	0.903
Ariege Pointer	6	5002845	4450897	1.72e+06	0.0008025	5.56777e+06	0.899
Scottish Deerhound	3	4037241	3086515	1.42622e+06	0.0006654	4.49942e+06	0.897
Dandie Dinmont Terrier	6	4522896	3778778	1.44784e+06	0.0006755	5.04444e+06	0.897
Pharaoh Hound	6	4985945	4394652	1.64158e+06	0.0007659	5.56222e+06	0.896
Keeshond	11	6466561	6238267	2.05364e+06	0.0009581	7214353	0.896
Brussels Griffon	7	5366962	4911095	1.77365e+06	0.0008275	5.98824e+06	0.896
Old English Sheepdog	7	5555694	5164106	1.8735e+06	0.0008741	6.21351e+06	0.894
Entlebucher Mountain Dog	9	4565772	3862384	1.37392e+06	0.000641	5.11253e+06	0.893
Bouvier des Flandres	10	5885288	5565628	1.84699e+06	0.0008617	6.61976e+06	0.889
Ibizan Hound	13	6191167	5903581	1.90592e+06	0.0008892	6.96405e+06	0.889
Japanese Spitz	12	5884755	5523999	1.84034e+06	0.0008586	6621814	0.889
Majorca Mastiff	3	4546543	3881485	1.79781e+06	0.0008388	5.11978e+06	0.888
Swiss Hound	12	6723630	6521707	2.07384e+06	0.0009675	7578897	0.887
Bernese Mountain Dog	10	5164806	4665559	1.56879e+06	0.0007319	5.83236e+06	0.886
Great Anglo-French Tricolour Hound	6	5666564	5258563	1.93953e+06	0.0009049	6.40894e+06	0.884
Otterhound	7	4934809	4337280	1.59211e+06	0.0007428	5.58373e+06	0.884
Boxer	5	4332965	3496988	1.35395e+06	0.0006317	4.90633e+06	0.883
Curly-Coated Retriever	4	4493604	3737587	1.5499e+06	0.0007231	5.08957e+06	0.883
Dogue de Bordeaux	5	4587955	3858277	1.50623e+06	0.0007027	5.19921e+06	0.882
Briard	6	5211408	4748807	1.79035e+06	0.0008353	5.9162e+06	0.881
Smooth Fox Terrier	9	5225973	4732322	1.56626e+06	0.0007307	5.94248e+06	0.879
Skye Terrier	3	4023632	3045762	1.40771e+06	0.0006568	4.57597e+06	0.879
Miniature Bull Terrier	4	3935565	2880732	1.18859e+06	0.0005545	4.47948e+06	0.879
Schipperke	6	5434700	4988785	1.84054e+06	0.0008587	6.18756e+06	0.878
Cardigan Welsh Corgi	5	5235001	4751554	1.85888e+06	0.0008672	5.96392e+06	0.878
Catahoula Leopard Dog	7	6283079	6038359	2.13544e+06	0.0009963	7161822	0.877
Swedish Vallhund	4	4631915	3919555	1.63879e+06	0.0007646	5.28133e+06	0.877
Wire Fox Terrier	4	4571286	3853212	1.59353e+06	0.0007434	5212275	0.877
Golden Retriever	6	5124067	4615768	1.72115e+06	0.000803	5.84473e+06	0.877
Welsh Springer Spaniel	4	4753892	4109195	1.71229e+06	0.0007989	5.42376e+06	0.876
Toy Fox Terrier	10	6545847	6323634	2.08692e+06	0.0009736	7.47005e+06	0.876
American Akita	7	6265394	5725052	2.04095e+06	0.0009522	7.16196e+06	0.875
German Spaniel	6	4919611	4334385	1.63075e+06	0.0007608	5624292	0.875
Vizsla	9	6293143	6034310	2.04032e+06	0.0009519	7.19754e+06	0.874
Greater Swiss Mountain Dog	10	4647542	3973836	1.35182e+06	0.0006307	5.32367e+06	0.873
Dachshund	17	7425141	7290150	2.13606e+06	0.0009966	8.5157e+06	0.872
Schapendoes	4	4677044	4030399	1.69143e+06	0.0007891	5364955	0.872
French Bulldog	7	5543754	5135052	1834838	0.000856	6369897	0.87
Black Russian Terrier	5	5252137	4765606	1.85699e+06	0.0008664	6.03566e+06	0.87
German Spitz Mittel	12	7352887	7213532	2.23099e+06	0.0010408	8.45648e+06	0.869
Chinook	6	4445299	3894328	1.42555e+06	0.0006651	5.11722e+06	0.869
Irish Water Spaniel	4	4614793	3915882	1.62934e+06	0.0007602	5.31367e+06	0.868
Bohemian Shepherd	6	3702265	3308335	1.24002e+06	0.0005785	4.266e+06	0.868
American Staffordshire Terrier	5	5250961	4776940	1.86149e+06	0.0008685	6.05075e+06	0.868
Tibetan Spaniel	4	5570214	5009946	2.10654e+06	0.0009828	6.4197e+06	0.868
Continental Bulldog	6	5095688	4563762	1.65452e+06	0.0007719	5.87763e+06	0.867
Alpine Dachsbracke	7	5282912	4803021	1.75228e+06	0.0008175	6.09626e+06	0.867
Spinone Italiano	7	6076117	5779906	2.05157e+06	0.0009571	7.01506e+06	0.866
American Water Spaniel	6	5274133	4804315	1.78553e+06	0.000833	6.09238e+06	0.866
Elo	5	6070900	5688017	2207169	0.0010297	7.01403e+06	0.866
Flat-Coated Retriever	3	4269082	3414440	1.56707e+06	0.0007311	4.94031e+06	0.864
Kuvasz	7	6269360	5996763	2136732	0.0009969	7.26145e+06	0.863
German Spitz Klein	11	7243327	7097843	2.21768e+06	0.0010346	8.40056e+06	0.862
Shetland Sheepdog	4	4858272	4244210	1.74789e+06	0.0008155	5637494	0.862
Norfolk Terrier	7	4547135	3796360	1.38204e+06	0.0006448	5.28293e+06	0.861
Lancashire Heeler	6	5701557	5337909	1.98776e+06	0.0009274	6.62421e+06	0.861
Nova Scotia Duck Tolling Retriever	4	5023540	4486133	1.86595e+06	0.0008705	5.83655e+06	0.861
Kishu	3	5250825	4339645	2.0001e+06	0.0009331	6.1053e+06	0.86
Cocker Spaniel	3	4226488	3338414	1.52821e+06	0.000713	4.91536e+06	0.86
Dalmatian	5	5429755	4990529	1.93154e+06	0.0009011	6.31789e+06	0.859
Great Anglo-French White and Orange Hound	6	5622652	5222310	1.9299e+06	0.0009004	6.54582e+06	0.859
Chinese Shar-Pei	8	7149489	6815632	2.34021e+06	0.0010918	8.32939e+06	0.858
Hovawart	4	4543184	4040735	1.68905e+06	0.000788	5.29456e+06	0.858
Swedish White Elkhound	7	5419981	4936143	1.78163e+06	0.0008312	6.32149e+06	0.857
English Pointer	8	6103313	5807024	1.9801e+06	0.0009238	7120721	0.857
Neapolitan Mastiff	5	5052188	4500620	1.77294e+06	0.0008271	5894849	0.857
Japanese Akita	4	5199677	4233220	1.75153e+06	0.0008172	6.06781e+06	0.857
Affenpinscher	5	4978599	4412753	1.73836e+06	0.000811	5.81289e+06	0.856
Miniature Schnauzer	4	4591131	3845043	1.56836e+06	0.0007317	5.36226e+06	0.856
Cesky Fousek	4	5186302	4687843	1.95394e+06	0.0009116	6.06781e+06	0.855
Welsh Terrier	5	5184092	4684610	1.82763e+06	0.0008527	6067312	0.854
Pomeranian	8	6400873	6163449	2.0998e+06	0.0009796	7.49168e+06	0.854
Shih Tzu	5	5720813	5242484	2.02152e+06	0.0009431	6.70925e+06	0.853
Barbet	6	5688431	5340844	1.97398e+06	0.0009209	6.68393e+06	0.851
Boykin Spaniel	5	5145811	4627847	1.82351e+06	0.0008507	6.05516e+06	0.85
German Hunting Terrier	6	5462924	5033292	1.86631e+06	0.0008707	6.42839e+06	0.85
Pyrenean Shepherd	11	6480914	6260094	2.02598e+06	0.0009452	7.62966e+06	0.849
Chesapeake Bay Retriever	5	5492840	5080883	1.96408e+06	0.0009163	6468237	0.849
Greenland Dog	3	4790980	3766801	1.69698e+06	0.0007917	5.64372e+06	0.849
Lhasa Apso	8	6965856	6700401	2.26781e+06	0.001058	8.20613e+06	0.849
Chow Chow	4	5954838	5220175	2.14188e+06	0.0009993	7.01678e+06	0.849
Bavarian Mountain Scent Hound	6	5711742	5335022	1.95433e+06	0.0009118	6.73494e+06	0.848
Hamiltonstovare	7	5599262	5219431	1.86906e+06	0.000872	6.61007e+06	0.847
Groenendael	3	4420895	3659894	1.66946e+06	0.0007789	5.22031e+06	0.847
Boston Terrier	3	4653357	3960926	1.80945e+06	0.0008442	5.50252e+06	0.846
Grand Basset Griffon Vendeen	5	5105626	4564532	1.76001e+06	0.0008211	6.04044e+06	0.845
Swedish Elkhound	4	5261181	4743789	1.97817e+06	0.0009229	6.22662e+06	0.845
Lowchen	4	4776579	4118468	1.71719e+06	0.0008011	5.65743e+06	0.844
Dogo Argentino	5	5159372	4663337	1.78062e+06	0.0008307	6.11163e+06	0.844
Pekingese	3	4719719	3889100	1.78363e+06	0.0008321	5594960	0.844
Cavalier King Charles Spaniel	5	4506929	3770727	1.49361e+06	0.0006968	5342739	0.844
Lakeland Terrier	6	4815148	4175142	1565089	0.0007302	5.70968e+06	0.843
Finnish Hound	6	5584685	5178653	1.90988e+06	0.000891	6.62439e+06	0.843
American Eskimo Dog	6	5861146	5513120	2.05407e+06	0.0009583	6.95391e+06	0.843
Continental Toy Spaniel (Papillon)	6	5968758	5652634	2078336	0.0009696	7.08255e+06	0.843
Belgian Sheepdog	3	4482527	3735359	1692632	0.0007897	5.32086e+06	0.842
Australian Kelpie	6	6114039	5821540	2.13125e+06	0.0009943	7264924	0.842
Icelandic Sheepdog	6	5670383	5267032	1.90789e+06	0.0008901	6.74007e+06	0.841
Dutch Shepherd	5	5857106	5663607	2.15987e+06	0.0010077	6.96449e+06	0.841
Australian Terrier	5	5333944	4860183	1.90087e+06	0.0008868	6.34262e+06	0.841
French Spaniel	6	5334402	4876566	1.81968e+06	0.000849	6.34555e+06	0.841
Pudelpointer	3	4761354	4123225	1892404	0.0008829	5.66825e+06	0.84
Polish Greyhound	7	6312076	6038917	2.12359e+06	0.0009907	7.51846e+06	0.84
Cretan Tracer	7	6475620	6291570	2.20456e+06	0.0010285	7.71632e+06	0.839
Olde English Bulldogge	3	4409925	3625509	1.65148e+06	0.0007705	5.25895e+06	0.839
Swedish Lapphund	3	4878816	4221119	1.9376e+06	0.000904	5.82149e+06	0.838
Japanese Chin	6	5454534	4886355	1.80135e+06	0.0008404	6.51273e+06	0.838
Finnish Spitz	6	5380497	4840133	1.80618e+06	0.0008427	6.42753e+06	0.837
English Springer Spaniel	3	4751169	4121623	1.87811e+06	0.0008762	5.68075e+06	0.836
Basset Artesien Normand	6	5112135	4577838	1.64921e+06	0.0007694	6.12077e+06	0.835
Eurasier	4	5727240	5193139	2.15343e+06	0.0010047	6.86889e+06	0.834
Stabyhoun	4	4478315	3730815	1.57165e+06	0.0007332	5.37501e+06	0.833
Cairn Terrier	5	5324180	4859097	1.89337e+06	0.0008833	6.40268e+06	0.832
Norwegian Elkhound	7	5692810	5287704	1.89073e+06	0.0008821	6.84684e+06	0.831
White Swiss Shepherd Dog	11	5087099	5001120	1.64279e+06	0.0007664	6.1214e+06	0.831
English Toy Spaniel	3	4378945	3591863	1.63908e+06	0.0007647	5.2768e+06	0.83
Estonian Hound	3	4459715	3715250	1.69042e+06	0.0007886	5.37633e+06	0.83
Lagotto Romagnolo	3	4901699	4321578	1.97395e+06	0.0009209	5.91153e+06	0.829
Rhodesian Ridgeback	3	4928186	4351025	1.99039e+06	0.0009286	5.94365e+06	0.829
Alaskan Malamute	3	5336852	4623199	2.10382e+06	0.0009815	6.43865e+06	0.829
Labrador Retriever	6	5573947	5183371	1.91383e+06	0.0008929	6.73304e+06	0.828
Whippet	6	5278680	4814364	1.74561e+06	0.0008144	6.37907e+06	0.827
Bull Terrier	4	3659477	2442070	1003069	0.000468	4.4234e+06	0.827
Giant Schnauzer	6	5690528	5330526	1972675	0.0009203	6.88054e+06	0.827
American Foxhound	7	5806463	5456807	1.95986e+06	0.0009144	7.03609e+06	0.825
Cane Corso	4	5449850	5043441	2.06992e+06	0.0009657	6.61013e+06	0.824
Portuguese Water Dog	8	6006145	5745121	1.98942e+06	0.0009281	7.29023e+06	0.824
Cesky Terrier	5	4335788	3503013	1.38793e+06	0.0006475	5265228	0.823
Harrier	3	4563916	3830945	1.7391e+06	0.0008114	5.54317e+06	0.823
German Shorthaired Pointer	4	5500156	5090805	2.09862e+06	0.0009791	6.68548e+06	0.823
Russian Hound	6	5977971	5655189	2.07528e+06	0.0009682	7.28428e+06	0.821
English Cocker Spaniel	3	4464006	3697244	1669449	0.0007789	5445806	0.82
Bergamasco Sheepdog	6	5821546	5563623	2.03717e+06	0.0009504	7104302	0.819
Brittany	8	6098145	5801165	1.98331e+06	0.0009253	7442729	0.819
Doberman Pinscher	7	4578937	3896282	1.40509e+06	0.0006555	5.58988e+06	0.819
Belgian Tervuren	6	6030694	5778975	2.10619e+06	0.0009826	7.36575e+06	0.819
German Giant Spitz	6	6140550	5855586	2.14974e+06	0.0010029	7.50262e+06	0.818
German Wirehaired Pointer	5	5671247	5304939	2.04209e+06	0.0009527	6.93711e+06	0.818
Spanish Mastiff	6	6325264	6063336	2.20509e+06	0.0010288	7.73744e+06	0.817
Portuguese Sheepdog	6	5756436	5437084	1.95062e+06	0.00091	7.04246e+06	0.817
Yorkshire Terrier	5	5652202	5266950	2.0061e+06	0.0009359	6.91612e+06	0.817
Magyar Agar	6	5708259	5356803	1.97131e+06	0.0009197	6.99027e+06	0.817
Norwegian Buhund	5	5105754	4552717	1.75855e+06	0.0008204	6.25325e+06	0.816
Boerboel	4	5493807	5092274	2.07737e+06	0.0009692	6.73234e+06	0.816
Turkish Zerdava	4	5700443	5259822	2.15697e+06	0.0010063	6.99303e+06	0.815
Drever	6	5378849	4936995	1.79816e+06	0.0008389	6.60058e+06	0.815
Continental Toy Spaniel (Phalene)	5	5645661	5261458	2.03101e+06	0.0009475	6.93702e+06	0.814
Bichon Frise	6	5893920	5560837	2.05929e+06	0.0009607	7.24425e+06	0.814
Patterdale Terrier	4	5355830	4916446	2.0171e+06	0.0009411	6.58449e+06	0.813
Beauceron	4	5178137	4733474	1.95901e+06	0.000914	6.37375e+06	0.812
Catalan Sheepdog	5	5493215	5120478	1.94506e+06	0.0009075	6.76302e+06	0.812
Newfoundland	6	5453559	5030273	1.85692e+06	0.0008663	6.71583e+06	0.812
Polish Tatra Sheepdog	8	6075449	5781084	2.001e+06	0.0009335	7.48666e+06	0.812
Shiba Inu	3	5425855	4612879	2.08844e+06	0.0009743	6.70005e+06	0.81
Blue Picardy Spaniel	3	4925441	4360528	1.97518e+06	0.0009215	6.08799e+06	0.809
English Toy Terrier	10	5794339	5436578	1.87944e+06	0.0008768	7.16247e+06	0.809
Pont-Audemer spaniel	6	5532941	5141149	1.87024e+06	0.0008725	6844361	0.808
Hellenic Hound	6	6445903	6196092	2.235e+06	0.0010427	7.99369e+06	0.806
Prague Ratter	5	5919377	5598368	2.13452e+06	0.0009958	7341379	0.806
Tibetan Terrier	3	5286599	4739762	2.16431e+06	0.0010097	6.56193e+06	0.806
Estrela Mountain Dog	6	6408818	6161551	2.21869e+06	0.0010351	7.95677e+06	0.805
Great Pyrenees	7	6195027	5920256	2090091	0.0009751	7.69183e+06	0.805
Cirneco dell'Etna	6	5762260	5400675	1.95177e+06	0.0009106	7.15627e+06	0.805
German Pinscher	4	4871545	4279528	1.76853e+06	0.0008251	6.05393e+06	0.805
South Russian Ovcharka	3	5136388	4620301	2.09922e+06	0.0009794	6.39765e+06	0.803
Bloodhound	5	4978615	4408223	1.62936e+06	0.0007602	6.21888e+06	0.801
Belgian Malinois	4	5515375	5208676	2.12447e+06	0.0009911	6.89229e+06	0.8
Brazilian Terrier	6	5722679	5361756	1.94409e+06	0.000907	7.1553e+06	0.8
Basset Fauve de Bretagne	5	5865750	5521643	2.10806e+06	0.0009835	7.3359e+06	0.8
Biewer Terrier	6	5528492	5107589	1.87128e+06	0.000873	6.91652e+06	0.799
Portuguese Podengo Pequeno	4	5700078	5333632	2.17062e+06	0.0010127	7.13378e+06	0.799
Landseer	4	4872483	4280443	1.78823e+06	0.0008343	6.09898e+06	0.799
Petit Bleu de Gascogne	4	5589716	5191833	2.11766e+06	0.000988	7001445	0.798
Galgo Espanol	6	6406574	6166633	2.20852e+06	0.0010304	8.02522e+06	0.798
Puli	6	6232165	5960962	2163359	0.0010093	7.80973e+06	0.798
Pumi	6	6162579	5900688	2155470	0.0010056	7.74055e+06	0.796
Griffon Nivernais	6	6331946	6075906	2.18069e+06	0.0010174	7.95918e+06	0.796
Bolognese	5	6070321	5767162	2.19202e+06	0.0010227	7.63597e+06	0.795
Havanese	4	5585265	5184104	2.09636e+06	0.000978	7043051	0.793
Australian Shepherd	3	4983294	4437609	2.0006e+06	0.0009334	6.29038e+06	0.792
Irish Setter	3	4889603	4310652	1.94733e+06	0.0009085	6.17866e+06	0.791
German Spitz	6	6611760	6385493	2.27208e+06	0.00106	8.36177e+06	0.791
Peruvian Hairless	5	6057615	5790100	2.18404e+06	0.0010189	7666391	0.79
Volpino Italiano	6	5269591	4778992	1.75611e+06	0.0008193	6.67013e+06	0.79
Wirehaired Pointing Griffon	6	5876911	5546617	2.0263e+06	0.0009453	7.45124e+06	0.789
Coton de Tulear	4	5903570	5573333	2.25538e+06	0.0010522	7488658	0.788
Tosa Inu	3	5245295	4677475	2.11391e+06	0.0009862	6.67226e+06	0.786
Slovak Cuvac	7	5739973	5389228	1957982	0.0009135	7.30641e+06	0.786
Maremma Sheepdog	6	6702357	6511825	2.31017e+06	0.0010778	8.53338e+06	0.785
Australian Cattle Dog	4	5209669	4701106	1.92412e+06	0.0008977	6.63782e+06	0.785
Silky Terrier	6	5941199	5627801	2.05646e+06	0.0009594	7.57117e+06	0.785
Thai Ridgeback	9	7744225	7475718	2.44025e+06	0.0011385	9.86962e+06	0.785
Belgian Laekenois	5	5065275	4602589	1.78775e+06	0.0008341	6.45578e+06	0.785
Picardy Spaniel	4	4829173	4231304	1.77691e+06	0.000829	6168671	0.783
American Hairless Terrier	5	5508021	5085333	1.90321e+06	0.0008879	7.03903e+06	0.782
Norrbottenspitz	5	6193852	5873478	2230295	0.0010405	7.92124e+06	0.782
Mudi	5	5946740	5667686	2.1481e+06	0.0010022	7.61126e+06	0.781
East-European shepherd	3	4080875	3846229	1.74991e+06	0.0008164	5231894	0.78
Anatolian Shepherd Dog	6	7353663	7157553	2.50332e+06	0.0011679	9.43185e+06	0.78
Danish-Swedish Farmdog	6	6345738	6107311	2191219	0.0010223	8155962	0.778
English Setter	3	4800844	4171898	1876568	0.0008755	6.18434e+06	0.776
Formosan Mountain Dog	3	5744828	5297928	2.38708e+06	0.0011137	7.41179e+06	0.775
Segugio Italiano	4	5845612	5516788	2.22908e+06	0.00104	7.5478e+06	0.774
Croatian Sheepdog	4	5207635	4741105	1.96292e+06	0.0009158	6727659	0.774
English Shepherd	3	5353140	4932864	2.23103e+06	0.0010409	6.91593e+06	0.774
Catalburun	3	5432804	5001003	2.25828e+06	0.0010536	7.02627e+06	0.773
Braques Francais	5	5645890	5263381	2.01482e+06	0.00094	7.31084e+06	0.772
Staffordshire Bull Terrier	6	5129904	4619914	1.71053e+06	0.000798	6.65675e+06	0.771
Dogo Canario	6	5763893	5442669	1.97518e+06	0.0009215	7.48803e+06	0.77
Spanish Water Dog	4	5704397	5348040	2.17311e+06	0.0010138	7.42091e+06	0.769
Bruno Jura Hound	5	5756380	5394868	2.06155e+06	0.0009618	7.50075e+06	0.767
Redbone Coonhound	3	5249209	4781006	2.15649e+06	0.0010061	6.84457e+06	0.767
Parson Russell Terrier	5	6085766	5793955	2.19013e+06	0.0010218	7.96877e+06	0.764
Small Swiss Hound	12	6397389	6158946	1989637	0.0009282	8.40808e+06	0.761
Miniature Pinscher	4	5826948	5491919	2.20951e+06	0.0010308	7673959	0.759
Mastiff	6	5103422	4566188	1.69256e+06	0.0007896	6.72316e+06	0.759
Russian Tsvetnaya Bolonka	6	6347334	6071642	2.1852e+06	0.0010195	8.38006e+06	0.757
Russian Toy	6	6601795	6389693	2255802	0.0010524	8734911	0.756
Blue Gascony Griffon	3	5523535	5120582	2.29623e+06	0.0010713	7.34992e+06	0.752
Weimaraner	5	5359407	4916781	1.85218e+06	0.0008641	7.14876e+06	0.75
Zagar	7	7438494	7293248	2.42424e+06	0.001131	9.94004e+06	0.748
Maltese	4	5162246	4629684	1.89699e+06	0.000885	6.90033e+06	0.748
Caucasian Ovcharka	4	6539312	6272383	2.49685e+06	0.0011649	8.74867e+06	0.747
Turkish Mastiff	5	6870216	6617940	2.45568e+06	0.0011457	9.20731e+06	0.746
Xoloitzcuintli	6	6922702	6793586	2.37268e+06	0.001107	9.29054e+06	0.745
Kars	5	6925609	6694999	2.48152e+06	0.0011577	9.30585e+06	0.744
Sarplaninac	4	6162848	5847478	2.351e+06	0.0010968	8.32853e+06	0.74
Samoyed	4	5377968	4822073	2.00841e+06	0.000937	7.36314e+06	0.73
American Bulldog	5	5327342	4862706	1.86018e+06	0.0008678	7.30045e+06	0.73
Central Asian Shepherd Dog	3	6156042	5771027	2.57344e+06	0.0012006	8.43797e+06	0.73
Akbash	3	6053114	5692238	2.53508e+06	0.0011827	8.41846e+06	0.719
Auvergne Pointer	6	5848690	5520286	1.97821e+06	0.0009229	8.26782e+06	0.707
Basset Hound	7	5329080	4859563	1.74528e+06	0.0008142	7.82242e+06	0.681
Saarloos Wolfdog	4	5717006	5304429	2073244	0.0009673	8.54548e+06	0.669
Kromfohrlander	7	4957330	4401786	1544590	0.0007206	8.00936e+06	0.619
Old German Shepherd	6	5363314	5236837	1.94314e+06	0.0009066	8.69215e+06	0.617
Bracco Italiano	6	5213586	4700665	1.77225e+06	0.0008268	9.19195e+06	0.567
Slovakian Wirehaired Pointer	4	5010995	4449203	1.85937e+06	0.0008675	9.03921e+06	0.554
Czechoslovakian Wolfdog	4	4857740	4504940	1.84524e+06	0.0008609	1.03095e+07	0.471

## Sheet: Table S4
Table S4. Breed group placement of each sample.
sampleName	Breed/Type	Category	Breed Group	Breed SubGroup
ACKR000001	Cocker Spaniel	Breed_Dogs	Spaniels	Flushing
ACKR000002	Cocker Spaniel	Breed_Dogs	Spaniels	Flushing
ACKR000003	Cocker Spaniel	Breed_Dogs	Spaniels	Flushing
AESK000001	American Eskimo Dog	Breed_Dogs	Spitz	German Spitz
AESK000002	American Eskimo Dog	Breed_Dogs	Spitz	German Spitz
AESK000003	American Eskimo Dog	Breed_Dogs	Spitz	German Spitz
AESK000004	American Eskimo Dog	Breed_Dogs	Spitz	German Spitz
AESK000005	American Eskimo Dog	Breed_Dogs	Spitz	German Spitz
AESK000006	American Eskimo Dog	Breed_Dogs	Spitz	German Spitz
AFFN000001	Affenpinscher	Breed_Dogs	Spitz	Schnauzer Spitz
AFFN000002	Affenpinscher	Breed_Dogs	Spitz	Schnauzer Spitz
AFFN000003	Affenpinscher	Breed_Dogs	Spitz	Schnauzer Spitz
AFFN000004	Affenpinscher	Breed_Dogs	Spitz	Schnauzer Spitz
AFFN000005	Affenpinscher	Breed_Dogs	Spitz	Schnauzer Spitz
AFFN000006	Affenpinscher	Breed_Dogs	Spitz	Schnauzer Spitz
AFGH000001	Afghan Hound	Breed_Dogs	Flockguard Sighthound	Central Asia
AFOX000001	American Foxhound	Breed_Dogs	Scenthounds	American
AFOX000002	American Foxhound	Breed_Dogs	Scenthounds	American
AFOX000003	American Foxhound	Breed_Dogs	Scenthounds	American
AFOX000004	American Foxhound	Breed_Dogs	Scenthounds	American
AFOX000005	American Foxhound	Breed_Dogs	Scenthounds	American
AFOX000006	American Foxhound	Breed_Dogs	Scenthounds	American
AFOX000007	American Foxhound	Breed_Dogs	Scenthounds	American
AHRT000001	American Hairless Terrier	Breed_Dogs	American Terriers	NA
AHRT000002	American Hairless Terrier	Breed_Dogs	American Terriers	NA
AHRT000003	American Hairless Terrier	Breed_Dogs	American Terriers	NA
AHRT000004	American Hairless Terrier	Breed_Dogs	American Terriers	NA
AHRT000005	American Hairless Terrier	Breed_Dogs	American Terriers	NA
AIRT000001	Airedale Terrier	Breed_Dogs	Scottish Terriers	NA
AKBH000001	Akbash	Breed_Dogs	Flockguard Sighthound	Central Asia
AKBH000002	Akbash	Breed_Dogs	Flockguard Sighthound	Central Asia
AKBH000003	Akbash	Breed_Dogs	Flockguard Sighthound	Central Asia
AKIN000001	Japanese Akita	Breed_Dogs	Asian	Asian Spitz
AKIN000002	Japanese Akita	Breed_Dogs	Asian	Asian Spitz
AKIT000001	American Akita	Breed_Dogs	Asian	Asian Spitz
AKIT000002	Japanese Akita	Breed_Dogs	Asian	Asian Spitz
AKIT000003	Japanese Akita	Breed_Dogs	Asian	Asian Spitz
AKIT000004	American Akita	Breed_Dogs	Asian	Asian Spitz
AKIT000005	American Akita	Breed_Dogs	Asian	Asian Spitz
AKIT000006	American Akita	Breed_Dogs	Asian	Asian Spitz
AKIT000007	American Akita	Breed_Dogs	Asian	Asian Spitz
AKIT000008	American Akita	Breed_Dogs	Asian	Asian Spitz
AKIT000009	American Akita	Breed_Dogs	Asian	Asian Spitz
ALDB000001	Alpine Dachsbracke	Breed_Dogs	Scenthounds	Dachshund-like
ALDB000002	Alpine Dachsbracke	Breed_Dogs	Scenthounds	Dachshund-like
ALDB000003	Alpine Dachsbracke	Breed_Dogs	Scenthounds	Dachshund-like
ALDB000004	Alpine Dachsbracke	Breed_Dogs	Scenthounds	Dachshund-like
ALDB000005	Alpine Dachsbracke	Breed_Dogs	Scenthounds	Dachshund-like
ALDB000006	Alpine Dachsbracke	Breed_Dogs	Scenthounds	Dachshund-like
ALDB000007	Alpine Dachsbracke	Breed_Dogs	Scenthounds	Dachshund-like
AMAL000001	Alaskan Malamute	Breed_Dogs	Asian	Asian Spitz
AMAL000002	Alaskan Malamute	Breed_Dogs	Asian	Asian Spitz
AMAL000003	Alaskan Malamute	Breed_Dogs	Asian	Asian Spitz
AMBD000001	American Bulldog	Breed_Dogs	Mastiffs	Bull Terriers
AMBD000002	American Bulldog	Breed_Dogs	Mastiffs	Bull Terriers
AMBD000003	American Bulldog	Breed_Dogs	Mastiffs	Bull Terriers
AMBD000004	American Bulldog	Breed_Dogs	Mastiffs	Bull Terriers
AMBD000005	American Bulldog	Breed_Dogs	Mastiffs	Bull Terriers
AMBD000006	American Bulldog	Breed_Dogs	Mastiffs	Bull Terriers
AMBD000007	American Bulldog	Breed_Dogs	Mastiffs	Bull Terriers
AMST000001	American Staffordshire Terrier	Breed_Dogs	Mastiffs	Bull Terriers
AMST000002	American Staffordshire Terrier	Breed_Dogs	Mastiffs	Bull Terriers
AMST000003	American Staffordshire Terrier	Breed_Dogs	Mastiffs	Bull Terriers
AMST000004	American Staffordshire Terrier	Breed_Dogs	Mastiffs	Bull Terriers
AMST000005	American Staffordshire Terrier	Breed_Dogs	Mastiffs	Bull Terriers
AMST000006	American Staffordshire Terrier	Breed_Dogs	Mastiffs	Bull Terriers
AMWS000001	American Water Spaniel	Breed_Dogs	Spaniels	Water
AMWS000002	American Water Spaniel	Breed_Dogs	Spaniels	Water
AMWS000003	American Water Spaniel	Breed_Dogs	Spaniels	Water
AMWS000004	American Water Spaniel	Breed_Dogs	Spaniels	Water
AMWS000005	American Water Spaniel	Breed_Dogs	Spaniels	Water
AMWS000006	American Water Spaniel	Breed_Dogs	Spaniels	Water
ANAT000001	Anatolian Shepherd Dog	Breed_Dogs	Flockguard Sighthound	Central Asia
ANAT000002	Anatolian Shepherd Dog	Breed_Dogs	Flockguard Sighthound	Central Asia
ANAT000003	Anatolian Shepherd Dog	Breed_Dogs	Flockguard Sighthound	Central Asia
ANAT000004	Anatolian Shepherd Dog	Breed_Dogs	Flockguard Sighthound	Central Asia
ANAT000005	Anatolian Shepherd Dog	Breed_Dogs	Flockguard Sighthound	Central Asia
ANAT000006	Anatolian Shepherd Dog	Breed_Dogs	Flockguard Sighthound	Central Asia
ANAT000007	Anatolian Shepherd Dog	Breed_Dogs	Flockguard Sighthound	Central Asia
ANFH000001	Anglo-Francais hound	Mixed/Other	n.d.	NA
ANFH000002	Anglo-Francais hound	Mixed/Other	n.d.	NA
ANFH000003	Anglo-Francais hound	Mixed/Other	n.d.	NA
ANFH000004	Anglo-Francais hound	Mixed/Other	n.d.	NA
APPZ000001	Appenzeller Sennenhund	Breed_Dogs	Alpine	NA
APPZ000002	Appenzeller Sennenhund	Breed_Dogs	Alpine	NA
APPZ000003	Appenzeller Sennenhund	Breed_Dogs	Alpine	NA
APPZ000004	Appenzeller Sennenhund	Breed_Dogs	Alpine	NA
APPZ000005	Appenzeller Sennenhund	Breed_Dogs	Alpine	NA
APPZ000006	Appenzeller Sennenhund	Breed_Dogs	Alpine	NA
APPZ000007	Appenzeller Sennenhund	Breed_Dogs	Alpine	NA
APPZ000008	Appenzeller Sennenhund	Breed_Dogs	Alpine	NA
APPZ000009	Appenzeller Sennenhund	Breed_Dogs	Alpine	NA
APPZ000010	Appenzeller Sennenhund	Breed_Dogs	Alpine	NA
APPZ000011	Appenzeller Sennenhund	Breed_Dogs	Alpine	NA
APPZ000012	Appenzeller Sennenhund	Breed_Dogs	Alpine	NA
APPZ000013	Appenzeller Sennenhund	Breed_Dogs	Alpine	NA
APPZ000014	Appenzeller Sennenhund	Breed_Dogs	Alpine	NA
ARHO000001	Artois Hound	Breed_Dogs	Scenthounds	Swiss
ARHO000002	Artois Hound	Breed_Dogs	Scenthounds	Swiss
ARIE000001	Ariegeois	Breed_Dogs	Scenthounds	French-English
ARIP000001	Ariege Pointer	Breed_Dogs	Pointers	Short-haired
ARIP000002	Ariege Pointer	Breed_Dogs	Pointers	Short-haired
ARIP000003	Ariege Pointer	Breed_Dogs	Pointers	Short-haired
ARIP000004	Ariege Pointer	Breed_Dogs	Pointers	Short-haired
ARIP000005	Ariege Pointer	Breed_Dogs	Pointers	Short-haired
ARIP000006	Ariege Pointer	Breed_Dogs	Pointers	Short-haired
ASKT000001	Silky Terrier	Breed_Dogs	Australian Terriers	NA
ASKT000002	Silky Terrier	Breed_Dogs	Australian Terriers	NA
ASKT000003	Silky Terrier	Breed_Dogs	Australian Terriers	NA
AUCD000001	Australian Cattle Dog	Breed_Dogs	UK Herding	NA
AUCD000002	Australian Cattle Dog	Breed_Dogs	UK Herding	NA
AUCD000003	Australian Cattle Dog	Breed_Dogs	UK Herding	NA
AUCD000004	Australian Cattle Dog	Breed_Dogs	UK Herding	NA
AUCD000005	Australian Cattle Dog	Breed_Dogs	UK Herding	NA
AUPO000001	Auvergne Pointer	Breed_Dogs	Pointers	Short-haired
AUPO000002	Auvergne Pointer	Breed_Dogs	Pointers	Short-haired
AUPO000003	Auvergne Pointer	Breed_Dogs	Pointers	Short-haired
AUPO000004	Auvergne Pointer	Breed_Dogs	Pointers	Short-haired
AUPO000005	Auvergne Pointer	Breed_Dogs	Pointers	Short-haired
AUPO000006	Auvergne Pointer	Breed_Dogs	Pointers	Short-haired
AUSK000001	Australian Kelpie	Breed_Dogs	UK Herding	NA
AUSK000002	Australian Kelpie	Breed_Dogs	UK Herding	NA
AUSK000003	Australian Kelpie	Breed_Dogs	UK Herding	NA
AUSK000004	Australian Kelpie	Breed_Dogs	UK Herding	NA
AUSK000005	Australian Kelpie	Breed_Dogs	UK Herding	NA
AUSK000006	Australian Kelpie	Breed_Dogs	UK Herding	NA
AUSS000001	Australian Shepherd	Breed_Dogs	UK Herding	NA
AUSS000002	Australian Shepherd	Breed_Dogs	UK Herding	NA
AUSS000003	Australian Shepherd	Breed_Dogs	UK Herding	NA
AUST000001	Australian Terrier	Breed_Dogs	Australian Terriers	NA
AUST000002	Australian Terrier	Breed_Dogs	Australian Terriers	NA
AUST000003	Australian Terrier	Breed_Dogs	Australian Terriers	NA
AUST000004	Australian Terrier	Breed_Dogs	Australian Terriers	NA
AUST000005	Australian Terrier	Breed_Dogs	Australian Terriers	NA
AZWK000001	Azawakh	Breed_Dogs	Flockguard Sighthound	Central Asia
BAND000001	Bandog	Mixed/Other	n.d.	NA
BANO000001	Basset Artesien Normand	Breed_Dogs	Scenthounds	Swiss
BANO000002	Basset Artesien Normand	Breed_Dogs	Scenthounds	Swiss
BANO000003	Basset Artesien Normand	Breed_Dogs	Scenthounds	Swiss
BANO000004	Basset Artesien Normand	Breed_Dogs	Scenthounds	Swiss
BANO000005	Basset Artesien Normand	Breed_Dogs	Scenthounds	Swiss
BANO000006	Basset Artesien Normand	Breed_Dogs	Scenthounds	Swiss
BASS000001	Basset Hound	Breed_Dogs	Scenthounds	Swiss
BASS000002	Basset Hound	Breed_Dogs	Scenthounds	Swiss
BASS000003	Basset Hound	Breed_Dogs	Scenthounds	Swiss
BASS000004	Basset Hound	Breed_Dogs	Scenthounds	Swiss
BASS000005	Basset Hound	Breed_Dogs	Scenthounds	Swiss
BASS000006	Basset Hound	Breed_Dogs	Scenthounds	Swiss
BASS000007	Basset Hound	Breed_Dogs	Scenthounds	Swiss
BBLS000001	White Swiss Shepherd Dog	Breed_Dogs	German Shepherds	NA
BBLS000002	White Swiss Shepherd Dog	Breed_Dogs	German Shepherds	NA
BBLS000003	White Swiss Shepherd Dog	Breed_Dogs	German Shepherds	NA
BEAU000001	Beauceron	Breed_Dogs	Continental Herders	NA
BEAU000002	Belgian Tervuren	Breed_Dogs	Belgian Herders	NA
BEAU000003	Beauceron	Breed_Dogs	Continental Herders	NA
BEAU000004	Beauceron	Breed_Dogs	Continental Herders	NA
BEAU000005	German shepherd mix	Mixed/Other	n.d.	NA
BEAU000006	Beauceron	Breed_Dogs	Continental Herders	NA
BEAU000007	German shepherd mix	Mixed/Other	n.d.	NA
BEDT000001	Bedlington Terrier	Breed_Dogs	Scottish Terriers	NA
BEDT000002	Bedlington Terrier	Breed_Dogs	Scottish Terriers	NA
BEDT000003	Bedlington Terrier	Breed_Dogs	Scottish Terriers	NA
BEDT000004	Bedlington Terrier	Breed_Dogs	Scottish Terriers	NA
BEDT000005	Bedlington Terrier	Breed_Dogs	Scottish Terriers	NA
BEDT000006	Bedlington Terrier	Breed_Dogs	Scottish Terriers	NA
BEDT000007	Bedlington Terrier	Breed_Dogs	Scottish Terriers	NA
BEDT000008	Bedlington Terrier	Breed_Dogs	Scottish Terriers	NA
BELS000001	Belgian Sheepdog	Breed_Dogs	Belgian Herders	NA
BELS000002	Belgian Sheepdog	Breed_Dogs	Belgian Herders	NA
BELS000003	Belgian Sheepdog	Breed_Dogs	Belgian Herders	NA
BERG000001	Bergamasco Sheepdog	Breed_Dogs	Continental Herders	NA
BERG000002	Bergamasco Sheepdog	Breed_Dogs	Continental Herders	NA
BERG000003	Bergamasco Sheepdog	Breed_Dogs	Continental Herders	NA
BERG000004	Bergamasco Sheepdog	Breed_Dogs	Continental Herders	NA
BERG000005	Bergamasco Sheepdog	Breed_Dogs	Continental Herders	NA
BERG000006	Bergamasco Sheepdog	Breed_Dogs	Continental Herders	NA
BFDB000001	Basset Fauve de Bretagne	Breed_Dogs	Scenthounds	French-English
BFDB000002	Basset Fauve de Bretagne	Breed_Dogs	Scenthounds	French-English
BFDB000003	Basset Fauve de Bretagne	Breed_Dogs	Scenthounds	French-English
BFDB000004	Unknown	Breed_Dogs	n.d.	NA
BFDB000005	Basset Fauve de Bretagne	Breed_Dogs	Scenthounds	French-English
BFDB000006	Basset Fauve de Bretagne	Breed_Dogs	Scenthounds	French-English
BGBA000001	Blue Gascony Griffon	Breed_Dogs	Scenthounds	French-English
BGGR000001	Blue Gascony Griffon	Breed_Dogs	Scenthounds	French-English
BGGR000002	Blue Gascony Griffon	Breed_Dogs	Scenthounds	French-English
BHSP000001	Bohemian Shepherd	Breed_Dogs	German Shepherds	NA
BHSP000002	Bohemian Shepherd	Breed_Dogs	German Shepherds	NA
BHSP000003	Bohemian Shepherd	Breed_Dogs	German Shepherds	NA
BHSP000004	Bohemian Shepherd	Breed_Dogs	German Shepherds	NA
BHSP000005	Bohemian Shepherd	Breed_Dogs	German Shepherds	NA
BHSP000006	Bohemian Shepherd	Breed_Dogs	German Shepherds	NA
BICH000001	Bichon Frise	Breed_Dogs	Asian	Bichons
BICH000002	Bichon Frise	Breed_Dogs	Asian	Bichons
BICH000003	Bichon Frise	Breed_Dogs	Asian	Bichons
BICH000004	Bichon Frise	Breed_Dogs	Asian	Bichons
BICH000005	Bichon Frise	Breed_Dogs	Asian	Bichons
BICH000006	Havanese	Breed_Dogs	Asian	Bichons
BICH000007	Bichon Frise	Breed_Dogs	Asian	Bichons
BILL000001	Billy	Breed_Dogs	Scenthounds	French-English
BILL000002	Billy	Breed_Dogs	Scenthounds	French-English
BLDH000001	Bloodhound	Breed_Dogs	Scenthounds	American
BLDH000002	Bloodhound	Breed_Dogs	Scenthounds	American
BLDH000003	Bloodhound	Breed_Dogs	Scenthounds	American
BLDH000004	Bloodhound	Breed_Dogs	Scenthounds	American
BLNK000001	Russian Tsvetnaya Bolonka	Breed_Dogs	Asian	NA
BLNK000002	Russian Tsvetnaya Bolonka	Breed_Dogs	Asian	NA
BLNK000003	Russian Tsvetnaya Bolonka	Breed_Dogs	Asian	NA
BLNK000004	Russian Tsvetnaya Bolonka	Breed_Dogs	Asian	NA
BLNK000005	Russian Tsvetnaya Bolonka	Breed_Dogs	Asian	NA
BLNK000006	Russian Tsvetnaya Bolonka	Breed_Dogs	Asian	NA
BLPS000001	Blue Picardy Spaniel	Breed_Dogs	Pointers	Setter
BLPS000002	Blue Picardy Spaniel	Breed_Dogs	Pointers	Setter
BLPS000003	Blue Picardy Spaniel	Breed_Dogs	Pointers	Setter
BLUE000001	Bluetick Coonhound	Breed_Dogs	Scenthounds	American
BLUE000002	Bluetick Coonhound	Breed_Dogs	Scenthounds	American
BLUE000003	Unknown	Breed_Dogs	n.d.	NA
BMAL000001	Belgian Malinois	Breed_Dogs	Belgian Herders	NA
BMAL000002	Belgian Malinois	Breed_Dogs	Belgian Herders	NA
BMAL000003	Belgian Malinois	Breed_Dogs	Belgian Herders	NA
BMAL000004	Belgian Malinois	Breed_Dogs	Belgian Herders	NA
BMSH000001	Bavarian Mountain Scent Hound	Breed_Dogs	Scenthounds	Dachshund-like
BMSH000002	Bavarian Mountain Scent Hound	Breed_Dogs	Scenthounds	Dachshund-like
BMSH000003	Bavarian Mountain Scent Hound	Breed_Dogs	Scenthounds	Dachshund-like
BMSH000004	Bavarian Mountain Scent Hound	Breed_Dogs	Scenthounds	Dachshund-like
BMSH000005	Bavarian Mountain Scent Hound	Breed_Dogs	Scenthounds	Dachshund-like
BMSH000006	Bavarian Mountain Scent Hound	Breed_Dogs	Scenthounds	Dachshund-like
BODA000001	Bouvier des Ardennes	Breed_Dogs	Belgian Herders	NA
BOER000001	Boerboel	Breed_Dogs	Mastiffs	English Mastiff
BOER000002	Boerboel	Breed_Dogs	Mastiffs	English Mastiff
BOER000003	Boerboel	Breed_Dogs	Mastiffs	English Mastiff
BOER000004	Boerboel	Breed_Dogs	Mastiffs	English Mastiff
BOER000005	Boerboel	Breed_Dogs	Mastiffs	English Mastiff
BOLO000001	Bolognese	Breed_Dogs	Asian	Bichons
BOLO000002	Bolognese	Breed_Dogs	Asian	Bichons
BOLO000003	Bolognese	Breed_Dogs	Asian	Bichons
BOLO000004	Bolognese	Breed_Dogs	Asian	Bichons
BOLO000005	Bolognese	Breed_Dogs	Asian	Bichons
BOLO000006	Bolognese	Breed_Dogs	Asian	Bichons
BOPD000001	Bourbonnais Pointing Dog	Breed_Dogs	Pointers	Short-haired
BOPD000002	Bourbonnais Pointing Dog	Breed_Dogs	Pointers	Short-haired
BOPD000003	Bourbonnais Pointing Dog	Breed_Dogs	Pointers	Short-haired
BOPD000004	Bourbonnais Pointing Dog	Breed_Dogs	Pointers	Short-haired
BOPD000005	Bourbonnais Pointing Dog	Breed_Dogs	Pointers	Short-haired
BOPD000006	Bourbonnais Pointing Dog	Breed_Dogs	Pointers	Short-haired
BOPD000007	Bourbonnais Pointing Dog	Breed_Dogs	Pointers	Short-haired
BOPD000008	Bourbonnais Pointing Dog	Breed_Dogs	Pointers	Short-haired
BOST000001	Boston Terrier	Breed_Dogs	Mastiffs	Bull Terriers
BOST000002	Boston Terrier	Breed_Dogs	Mastiffs	Bull Terriers
BOST000003	Boston Terrier	Breed_Dogs	Mastiffs	Bull Terriers
BOUV000001	Bouvier des Flandres	Breed_Dogs	Belgian Herders	NA
BOUV000002	Bouvier des Flandres	Breed_Dogs	Belgian Herders	NA
BOXR000001	Boxer	Breed_Dogs	Mastiffs	Bull Terriers
BOXR000002	Boxer	Breed_Dogs	Mastiffs	Bull Terriers
BOXR000003	Boxer	Breed_Dogs	Mastiffs	Bull Terriers
BOXR000004	Boxer	Breed_Dogs	Mastiffs	Bull Terriers
BOXR000005	Boxer	Breed_Dogs	Mastiffs	Bull Terriers
BOYK000001	Boykin Spaniel	Breed_Dogs	Spaniels	Water
BOYK000002	Boykin Spaniel	Breed_Dogs	Spaniels	Water
BOYK000003	Boykin Spaniel	Breed_Dogs	Spaniels	Water
BOYK000004	Boykin Spaniel	Breed_Dogs	Spaniels	Water
BOYK000005	Boykin Spaniel	Breed_Dogs	Spaniels	Water
BRAC000001	Bracco Italiano	Breed_Dogs	Pointers	Short-haired
BRAC000002	Bracco Italiano	Breed_Dogs	Pointers	Short-haired
BRAC000003	Bracco Italiano	Breed_Dogs	Pointers	Short-haired
BRAC000004	Bracco Italiano	Breed_Dogs	Pointers	Short-haired
BRAC000005	Bracco Italiano	Breed_Dogs	Pointers	Short-haired
BRAC000006	Bracco Italiano	Breed_Dogs	Pointers	Short-haired
BRBT000001	Barbet	Breed_Dogs	Water Dogs	NA
BRBT000002	Barbet	Breed_Dogs	Water Dogs	NA
BRBT000003	Barbet	Breed_Dogs	Water Dogs	NA
BRBT000004	Barbet	Breed_Dogs	Water Dogs	NA
BRBT000005	Barbet	Breed_Dogs	Water Dogs	NA
BRBT000006	Barbet	Breed_Dogs	Water Dogs	NA
BRFR000001	Braques Francais	Breed_Dogs	Pointers	Short-haired
BRFR000002	Braques Francais	Breed_Dogs	Pointers	Short-haired
BRFR000003	Braques Francais	Breed_Dogs	Pointers	Short-haired
BRFR000004	Braques Francais	Breed_Dogs	Pointers	Short-haired
BRFR000005	Braques Francais	Breed_Dogs	Pointers	Short-haired
BRGV000001	Briquet Griffon Vendeen	Breed_Dogs	Scenthounds	French-English
BRGV000002	Briquet Griffon Vendeen	Breed_Dogs	Scenthounds	French-English
BRHM000001	Broholmer	Breed_Dogs	Retriever	NA
BRHM000002	Broholmer	Breed_Dogs	Retriever	NA
BRHM000003	Broholmer	Breed_Dogs	Retriever	NA
BRHM000004	Broholmer	Breed_Dogs	Retriever	NA
BRHM000005	Broholmer	Breed_Dogs	Retriever	NA
BRHM000006	Broholmer	Breed_Dogs	Retriever	NA
BRIA000001	Briard	Breed_Dogs	Continental Herders	NA
BRIA000002	Briard	Breed_Dogs	Continental Herders	NA
BRIA000003	Briard	Breed_Dogs	Continental Herders	NA
BRIA000004	Briard	Breed_Dogs	Continental Herders	NA
BRIA000005	Briard	Breed_Dogs	Continental Herders	NA
BRIA000006	Briard	Breed_Dogs	Continental Herders	NA
BRIA000007	Briard	Breed_Dogs	Continental Herders	NA
BRIT000001	Brittany	Breed_Dogs	Pointers	Pointing Spaniels
BRIT000002	Brittany	Breed_Dogs	Pointers	Pointing Spaniels
BRIT000003	Brittany	Breed_Dogs	Pointers	Pointing Spaniels
BRIT000004	Brittany	Breed_Dogs	Pointers	Pointing Spaniels
BRIT000005	Brittany	Breed_Dogs	Pointers	Pointing Spaniels
BRIT000006	Brittany	Breed_Dogs	Pointers	Pointing Spaniels
BRIT000007	Brittany	Breed_Dogs	Pointers	Pointing Spaniels
BRIT000008	Brittany	Breed_Dogs	Pointers	Pointing Spaniels
BRJH000001	Bruno Jura Hound	Breed_Dogs	Scenthounds	Swiss
BRJH000002	Bloodhound	Breed_Dogs	Scenthounds	American
BRJH000003	Bruno Jura Hound	Breed_Dogs	Scenthounds	Swiss
BRJH000004	Bruno Jura Hound	Breed_Dogs	Scenthounds	Swiss
BRJH000005	Bruno Jura Hound	Breed_Dogs	Scenthounds	Swiss
BRJH000006	Bruno Jura Hound	Breed_Dogs	Scenthounds	Swiss
BRMD000001	Bernese Mountain Dog	Breed_Dogs	Alpine	NA
BRMD000002	Bernese Mountain Dog	Breed_Dogs	Alpine	NA
BRMD000003	Bernese Mountain Dog	Breed_Dogs	Alpine	NA
BRMD000004	Bernese Mountain Dog	Breed_Dogs	Alpine	NA
BRMD000005	Bernese Mountain Dog	Breed_Dogs	Alpine	NA
BRMD000006	Bernese Mountain Dog	Breed_Dogs	Alpine	NA
BRMD000007	Bernese Mountain Dog	Breed_Dogs	Alpine	NA
BRMD000008	Bernese Mountain Dog	Breed_Dogs	Alpine	NA
BRMD000009	Bernese Mountain Dog	Breed_Dogs	Alpine	NA
BRMD000010	Bernese Mountain Dog	Breed_Dogs	Alpine	NA
BRTR000001	Black Russian Terrier	Breed_Dogs	Multi Purpose	NA
BRTR000002	Black Russian Terrier	Breed_Dogs	Multi Purpose	NA
BRTR000003	Black Russian Terrier	Breed_Dogs	Multi Purpose	NA
BRTR000004	Black Russian Terrier	Breed_Dogs	Multi Purpose	NA
BRTR000005	Black Russian Terrier	Breed_Dogs	Multi Purpose	NA
BRUS000001	Brussels Griffon	Breed_Dogs	Spitz	Schnauzer Spitz
BRUS000002	Brussels Griffon	Breed_Dogs	Spitz	Schnauzer Spitz
BRUS000003	Brussels Griffon	Breed_Dogs	Spitz	Schnauzer Spitz
BRUS000004	Brussels Griffon	Breed_Dogs	Spitz	Schnauzer Spitz
BRUS000005	Brussels Griffon	Breed_Dogs	Spitz	Schnauzer Spitz
BRUS000006	Brussels Griffon	Breed_Dogs	Spitz	Schnauzer Spitz
BRUS000007	Brussels Griffon	Breed_Dogs	Spitz	Schnauzer Spitz
BRZT000001	Brazilian Terrier	Breed_Dogs	American Terriers	NA
BRZT000002	Brazilian Terrier	Breed_Dogs	American Terriers	NA
BRZT000003	Brazilian Terrier	Breed_Dogs	American Terriers	NA
BRZT000004	Brazilian Terrier	Breed_Dogs	American Terriers	NA
BRZT000005	Brazilian Terrier	Breed_Dogs	American Terriers	NA
BRZT000006	Brazilian Terrier	Breed_Dogs	American Terriers	NA
BTAN000001	Black and Tan Coonhound	Breed_Dogs	Scenthounds	American
BULD000001	French Bulldog	Breed_Dogs	Mastiffs	Bull Terriers
BULD000002	English Bulldog	Breed_Dogs	Mastiffs	Bull Terriers
BULD000003	English Bulldog	Breed_Dogs	Mastiffs	Bull Terriers
BULM000001	Bullmastiff	Breed_Dogs	Mastiffs	English Mastiff
BULM000002	Bullmastiff	Breed_Dogs	Mastiffs	English Mastiff
BULM000003	Bullmastiff	Breed_Dogs	Mastiffs	English Mastiff
BULM000004	Bullmastiff	Breed_Dogs	Mastiffs	English Mastiff
BULM000005	Bullmastiff	Breed_Dogs	Mastiffs	English Mastiff
BULM000006	Bullmastiff	Breed_Dogs	Mastiffs	English Mastiff
BULT000001	Bull Terrier	Breed_Dogs	Mastiffs	Bull Terriers
BULT000002	Bull Terrier	Breed_Dogs	Mastiffs	Bull Terriers
BULT000003	Bull Terrier	Breed_Dogs	Mastiffs	Bull Terriers
BULT000004	Bull Terrier	Breed_Dogs	Mastiffs	Bull Terriers
BWRT000001	Biewer Terrier	Breed_Dogs	Australian Terriers	NA
BWRT000002	Biewer Terrier	Breed_Dogs	Australian Terriers	NA
BWRT000003	Biewer Terrier	Breed_Dogs	Australian Terriers	NA
BWRT000004	Biewer Terrier	Breed_Dogs	Australian Terriers	NA
BWRT000005	Biewer Terrier	Breed_Dogs	Australian Terriers	NA
BWRT000006	Biewer Terrier	Breed_Dogs	Australian Terriers	NA
CAAN000001	Canaan Dog	Breed_Dogs	Flockguard Sighthound	Central Asia
CAAN000002	Canaan Dog	Breed_Dogs	Flockguard Sighthound	Central Asia
CAIR000001	Cairn Terrier	Breed_Dogs	Scottish Terriers	NA
CAIR000002	Cairn Terrier	Breed_Dogs	Scottish Terriers	NA
CAIR000003	Cairn Terrier	Breed_Dogs	Scottish Terriers	NA
CAIR000004	Cairn Terrier	Breed_Dogs	Scottish Terriers	NA
CAIR000005	Cairn Terrier	Breed_Dogs	Scottish Terriers	NA
CANM000001	Dogo Canario	Breed_Dogs	Mastiffs	English Mastiff
CANM000002	Dogo Canario	Breed_Dogs	Mastiffs	English Mastiff
CANM000003	Dogo Canario	Breed_Dogs	Mastiffs	English Mastiff
CANM000004	Dogo Canario	Breed_Dogs	Mastiffs	English Mastiff
CANM000005	Dogo Canario	Breed_Dogs	Mastiffs	English Mastiff
CANM000006	Dogo Canario	Breed_Dogs	Mastiffs	English Mastiff
CARD000001	Cardigan Welsh Corgi	Breed_Dogs	UK Herding	NA
CARD000002	Schipperke	Breed_Dogs	Spitz	Schnauzer Spitz
CARD000003	Cardigan Welsh Corgi	Breed_Dogs	UK Herding	NA
CARD000004	Cardigan Welsh Corgi	Breed_Dogs	UK Herding	NA
CARD000005	Cardigan Welsh Corgi	Breed_Dogs	UK Herding	NA
CARO000001	Carolina Dog	Mixed/Other	n.d.	NA
CARO000002	Carolina Dog	Mixed/Other	n.d.	NA
CARO000003	Carolina Dog	Mixed/Other	n.d.	NA
CASD000001	Central Asian Shepherd Dog	Breed_Dogs	Flockguard Sighthound	Central Asia
CASD000002	Central Asian Shepherd Dog	Breed_Dogs	Flockguard Sighthound	Central Asia
CASD000003	Central Asian Shepherd Dog	Breed_Dogs	Flockguard Sighthound	Central Asia
CAUC000001	Caucasian Ovcharka	Breed_Dogs	Flockguard Sighthound	Central Asia
CAUC000002	Caucasian Ovcharka	Breed_Dogs	Flockguard Sighthound	Central Asia
CAUC000003	Caucasian Ovcharka	Breed_Dogs	Flockguard Sighthound	Central Asia
CAUC000004	Caucasian Ovcharka	Breed_Dogs	Flockguard Sighthound	Central Asia
CCRT000001	Curly-Coated Retriever	Breed_Dogs	Spaniels	Water
CCRT000002	Curly-Coated Retriever	Breed_Dogs	Spaniels	Water
CCRT000003	Curly-Coated Retriever	Breed_Dogs	Spaniels	Water
CCRT000004	Curly-Coated Retriever	Breed_Dogs	Spaniels	Water
CFOU000001	Cesky Fousek	Breed_Dogs	Pointers	Wire-haired
CFOU000002	Cesky Fousek	Breed_Dogs	Pointers	Wire-haired
CFOU000003	Cesky Fousek	Breed_Dogs	Pointers	Wire-haired
CFOU000004	Cesky Fousek	Breed_Dogs	Pointers	Wire-haired
CHBR000001	Chesapeake Bay Retriever	Breed_Dogs	Retriever	NA
CHBR000002	Chesapeake Bay Retriever	Breed_Dogs	Retriever	NA
CHBR000003	Chesapeake Bay Retriever	Breed_Dogs	Retriever	NA
CHBR000004	Chesapeake Bay Retriever	Breed_Dogs	Retriever	NA
CHBR000005	Chesapeake Bay Retriever	Breed_Dogs	Retriever	NA
CHIH000005	Chihuahua	Breed_Dogs	Asian	New World Toy
CHIH000006	Chihuahua	Breed_Dogs	Asian	New World Toy
CHIN000001	Japanese Chin	Breed_Dogs	Asian	Asian Toy
CHIN000003	Japanese Chin	Breed_Dogs	Asian	Asian Toy
CHIN000004	Japanese Chin	Breed_Dogs	Asian	Asian Toy
CHIN000005	Japanese Chin	Breed_Dogs	Asian	Asian Toy
CHIN000006	Japanese Chin	Breed_Dogs	Asian	Asian Toy
CHIN000007	Japanese Chin	Breed_Dogs	Asian	Asian Toy
CHIN000008	Japanese Chin	Breed_Dogs	Asian	Asian Toy
CHOW000001	Chow Chow	Breed_Dogs	Asian	Asian Spitz
CHOW000002	Chow Chow	Breed_Dogs	Asian	Asian Spitz
CHOW000003	Chow Chow	Breed_Dogs	Asian	Asian Spitz
CHOW000004	Chow Chow	Breed_Dogs	Asian	Asian Spitz
CIRN000001	Cirneco dell'Etna	Breed_Dogs	Flockguard Sighthound	Iberian
CIRN000002	Cirneco dell'Etna	Breed_Dogs	Flockguard Sighthound	Iberian
CIRN000003	Cirneco dell'Etna	Breed_Dogs	Flockguard Sighthound	Iberian
CIRN000004	Cirneco dell'Etna	Breed_Dogs	Flockguard Sighthound	Iberian
CIRN000005	Cirneco dell'Etna	Breed_Dogs	Flockguard Sighthound	Iberian
CIRN000006	Cirneco dell'Etna	Breed_Dogs	Flockguard Sighthound	Iberian
CKCS000001	Cavalier King Charles Spaniel	Breed_Dogs	Spaniels	Flushing
CKCS000002	Cavalier King Charles Spaniel	Breed_Dogs	Spaniels	Flushing
CKCS000003	Cavalier King Charles Spaniel	Breed_Dogs	Spaniels	Flushing
CKCS000004	Cavalier King Charles Spaniel	Breed_Dogs	Spaniels	Flushing
CKCS000005	Cavalier King Charles Spaniel	Breed_Dogs	Spaniels	Flushing
CLATUS000001	USA	Coyote	NA	NA
CLATUS000002	USA	Coyote	NA	NA
CLATUS000003	USA	Coyote	NA	NA
CLATUS000004	USA	Coyote	NA	NA
CLSP000001	Clumber Spaniel	Breed_Dogs	Spaniels	Flushing
CLSP000002	Clumber Spaniel	Breed_Dogs	Spaniels	Flushing
CLSP000003	Clumber Spaniel	Breed_Dogs	Spaniels	Flushing
CLSP000004	Clumber Spaniel	Breed_Dogs	Spaniels	Flushing
CLSP000005	Clumber Spaniel	Breed_Dogs	Spaniels	Flushing
CLUPAZ000001	Azerbaijan	Wolf	NA	NA
CLUPCN000001	China	Wolf	NA	NA
CLUPCN000002	China	Wolf	NA	NA
CLUPCN000003	China	Wolf	NA	NA
CLUPCN000004	China	Wolf	NA	NA
CLUPCN000005	China	Wolf	NA	NA
CLUPCN000006	China	Wolf	NA	NA
CLUPCN000007	China	Wolf	NA	NA
CLUPCN000008	China	Wolf	NA	NA
CLUPCN000009	China	Wolf	NA	NA
CLUPCN000010	China	Wolf	NA	NA
CLUPCN000011	China	Wolf	NA	NA
CLUPCN000012	China	Wolf	NA	NA
CLUPEA000001	Eurasia	Wolf	NA	NA
CLUPEU000002	Europe	Wolf	NA	NA
CLUPGR000001	Greece	Wolf	NA	NA
CLUPGR000002	Greece	Wolf	NA	NA
CLUPGR000003	Greece	Wolf	NA	NA
CLUPGR000004	Greece	Wolf	NA	NA
CLUPGR000005	Greece	Wolf	NA	NA
CLUPGR000006	Greece	Wolf	NA	NA
CLUPGR000007	Greece	Wolf	NA	NA
CLUPGR000008	Greece	Wolf	NA	NA
CLUPGR000009	Greece	Wolf	NA	NA
CLUPGR000010	Greece	Wolf	NA	NA
CLUPGR000011	Greece	Wolf	NA	NA
CLUPGR000012	Greece	Wolf	NA	NA
CLUPIR000001	Iran	Wolf	NA	NA
CLUPIR000002	Iran	Wolf	NA	NA
CLUPIR000003	Iran	Wolf	NA	NA
CLUPIR000004	Iran	Wolf	NA	NA
CLUPIR000005	Iran	Wolf	NA	NA
CLUPIR000006	Iran	Wolf	NA	NA
CLUPIR000007	Iran	Wolf	NA	NA
CLUPKG000001	Kyrgyzstan	Wolf	NA	NA
CLUPKZ000002	Kazakhstan	Wolf	NA	NA
CLUPPT000001	Portugal	Wolf	NA	NA
CLUPPT000002	Portugal	Wolf	NA	NA
CLUPRU000001	Russia	Wolf	NA	NA
CLUPRU000002	Russia	Wolf	NA	NA
CLUPRU000003	Russia	Wolf	NA	NA
CLUPRU000004	Russia	Wolf	NA	NA
CLUPRU000005	Russia	Wolf	NA	NA
CLUPRU000006	Russia	Wolf	NA	NA
CLUPRU000007	Russia	Wolf	NA	NA
CLUPRU000008	Russia	Wolf	NA	NA
CLUPRU000009	Russia	Wolf	NA	NA
CLUPRU000010	Russia	Wolf	NA	NA
CLUPRU000011	Russia	Wolf	NA	NA
CLUPRU000012	Russia	Wolf	NA	NA
CLUPRU000013	Russia	Wolf	NA	NA
CLUPRU000014	Russia	Wolf	NA	NA
CLUPRU000018	Russia	Wolf	NA	NA
CLUPRU000019	Russia	Wolf	NA	NA
CLUPRU000020	Russia	Wolf	NA	NA
CLUPSE000001	Sweden	Wolf	NA	NA
CLUPSE000002	Sweden	Wolf	NA	NA
CLUPSE000003	Sweden	Wolf	NA	NA
CLUPSE000004	Sweden	Wolf	NA	NA
CLUPSE000005	Sweden	Wolf	NA	NA
CLUPSE000006	Sweden	Wolf	NA	NA
CLUPTJ000001	Tajikistan	Wolf	NA	NA
CLUPTJ000002	Tajikistan	Wolf	NA	NA
CLUPTJ000003	Tajikistan	Wolf	NA	NA
CLUPTJ000004	Tajikistan	Wolf	NA	NA
CLUPTJ000005	Tajikistan	Wolf	NA	NA
CLUPTJ000006	Tajikistan	Wolf	NA	NA
CLUPTJ000007	Tajikistan	Wolf	NA	NA
CNCS000001	Cane Corso	Breed_Dogs	Mastiffs	Italian Mastiff
CNCS000002	Cane Corso	Breed_Dogs	Mastiffs	Italian Mastiff
CNCS000003	Cane Corso	Breed_Dogs	Mastiffs	Italian Mastiff
CNCS000004	Cane Corso	Breed_Dogs	Mastiffs	Italian Mastiff
CNTI000001	Continental Bulldog	Breed_Dogs	Mastiffs	Bull Terriers
CNTI000002	Continental Bulldog	Breed_Dogs	Mastiffs	Bull Terriers
CNTI000003	Continental Bulldog	Breed_Dogs	Mastiffs	Bull Terriers
CNTI000004	Continental Bulldog	Breed_Dogs	Mastiffs	Bull Terriers
CNTI000005	Continental Bulldog	Breed_Dogs	Mastiffs	Bull Terriers
CNTI000006	Continental Bulldog	Breed_Dogs	Mastiffs	Bull Terriers
COLL000001	Collie	Breed_Dogs	UK Herding	NA
COLL000002	Collie	Breed_Dogs	UK Herding	NA
COLL000003	Collie	Breed_Dogs	UK Herding	NA
COLL000004	Collie	Breed_Dogs	UK Herding	NA
COLL000005	Collie	Breed_Dogs	UK Herding	NA
COLL000006	Collie	Breed_Dogs	UK Herding	NA
COLL000007	Collie	Breed_Dogs	UK Herding	NA
COLL000008	Collie	Breed_Dogs	UK Herding	NA
COLL000009	Collie	Breed_Dogs	UK Herding	NA
COLL000010	Collie	Breed_Dogs	UK Herding	NA
COLL000011	Collie	Breed_Dogs	UK Herding	NA
COLL000012	Collie	Breed_Dogs	UK Herding	NA
COLL000013	Collie	Breed_Dogs	UK Herding	NA
COOK000001	Chinook	Breed_Dogs	None	NA
COOK000002	Chinook	Breed_Dogs	None	NA
COOK000003	Chinook	Breed_Dogs	None	NA
COOK000004	Chinook	Breed_Dogs	None	NA
COOK000005	Chinook	Breed_Dogs	None	NA
COOK000006	Chinook	Breed_Dogs	None	NA
COOK000007	Chinook	Breed_Dogs	None	NA
COOK000008	Chinook	Breed_Dogs	None	NA
COOK000009	Chinook	Breed_Dogs	None	NA
COTO000001	Coton de Tulear	Breed_Dogs	Asian	Bichons
COTO000002	Coton de Tulear	Breed_Dogs	Asian	Bichons
COTO000003	Coton de Tulear	Breed_Dogs	Asian	Bichons
COTO000004	Coton de Tulear	Breed_Dogs	Asian	Bichons
CRES000001	Chinese Crested	Breed_Dogs	Asian	New World Toy
CRES000002	Chinese Crested	Breed_Dogs	Asian	New World Toy
CRSP000001	Croatian Sheepdog	Breed_Dogs	Hungary	Herder
CRSP000002	Croatian Sheepdog	Breed_Dogs	Hungary	Herder
CRSP000003	Croatian Sheepdog	Breed_Dogs	Hungary	Herder
CRSP000004	Croatian Sheepdog	Breed_Dogs	Hungary	Herder
CRTR000001	Cretan Tracer	Breed_Dogs	Flockguard Sighthound	Central Asia
CRTR000002	Cretan Tracer	Breed_Dogs	Flockguard Sighthound	Central Asia
CRTR000003	Cretan Tracer	Breed_Dogs	Flockguard Sighthound	Central Asia
CRTR000004	Cretan Tracer	Breed_Dogs	Flockguard Sighthound	Central Asia
CRTR000005	Cretan Tracer	Breed_Dogs	Flockguard Sighthound	Central Asia
CRTR000006	Cretan Tracer	Breed_Dogs	Flockguard Sighthound	Central Asia
CRTR000007	Cretan Tracer	Breed_Dogs	Flockguard Sighthound	Central Asia
CRTR000008	Hellenic Hound	Breed_Dogs	Scenthounds	Mediterranean
CRTR000009	Hellenic Hound	Breed_Dogs	Scenthounds	Mediterranean
CRTR000010	Hellenic Hound	Breed_Dogs	Scenthounds	Mediterranean
CRTR000011	Hellenic Hound	Breed_Dogs	Scenthounds	Mediterranean
CRTR000012	Hellenic Hound	Breed_Dogs	Scenthounds	Mediterranean
CSHD000001	Catalan Sheepdog	Breed_Dogs	Continental Herders	NA
CSHD000002	Catalan Sheepdog	Breed_Dogs	Continental Herders	NA
CSHD000003	Catalan Sheepdog	Breed_Dogs	Continental Herders	NA
CSHD000004	Catalan Sheepdog	Breed_Dogs	Continental Herders	NA
CSHD000005	Catalan Sheepdog	Breed_Dogs	Continental Herders	NA
CSKT000001	Cesky Terrier	Breed_Dogs	English Terriers	NA
CSKT000002	Cesky Terrier	Breed_Dogs	English Terriers	NA
CSKT000003	Cesky Terrier	Breed_Dogs	English Terriers	NA
CSKT000004	Cesky Terrier	Breed_Dogs	English Terriers	NA
CSKT000005	Cesky Terrier	Breed_Dogs	English Terriers	NA
CSKT000006	Cesky Terrier	Breed_Dogs	English Terriers	NA
CSKT000007	Cesky Terrier	Breed_Dogs	English Terriers	NA
CSKT000008	Cesky Terrier	Breed_Dogs	English Terriers	NA
CTLB000001	Catalburun	Breed_Dogs	Pointers	Pointer
CTLB000002	Catalburun	Breed_Dogs	Pointers	Pointer
CTLB000003	Catalburun	Breed_Dogs	Pointers	Pointer
CZEC000001	Czechoslovakian Wolfdog	Breed_Dogs	German Shepherds	NA
CZEC000002	Czechoslovakian Wolfdog	Breed_Dogs	German Shepherds	NA
CZEC000003	Czechoslovakian Wolfdog	Breed_Dogs	German Shepherds	NA
CZEC000004	Czechoslovakian Wolfdog	Breed_Dogs	German Shepherds	NA
DACH000001	Dachshund	Breed_Dogs	Scenthounds	Dachshund-like
DACH000002	Dachshund	Breed_Dogs	Scenthounds	Dachshund-like
DACH000003	Dachshund	Breed_Dogs	Scenthounds	Dachshund-like
DACH000004	Dachshund	Breed_Dogs	Scenthounds	Dachshund-like
DACH000005	Dachshund	Breed_Dogs	Scenthounds	Dachshund-like
DACH000006	Dachshund	Breed_Dogs	Scenthounds	Dachshund-like
DACH000007	Dachshund	Breed_Dogs	Scenthounds	Dachshund-like
DACH000008	Dachshund	Breed_Dogs	Scenthounds	Dachshund-like
DACH000009	Dachshund	Breed_Dogs	Scenthounds	Dachshund-like
DACH000010	Dachshund	Breed_Dogs	Scenthounds	Dachshund-like
DACH000011	Dachshund	Breed_Dogs	Scenthounds	Dachshund-like
DACH000012	Dachshund	Breed_Dogs	Scenthounds	Dachshund-like
DACH000013	Dachshund	Breed_Dogs	Scenthounds	Dachshund-like
DACH000014	Dachshund	Breed_Dogs	Scenthounds	Dachshund-like
DACH000015	Dachshund	Breed_Dogs	Scenthounds	Dachshund-like
DACH000016	Dachshund	Breed_Dogs	Scenthounds	Dachshund-like
DACH000017	Dachshund	Breed_Dogs	Scenthounds	Dachshund-like
DALM000001	Dalmatian	Breed_Dogs	None	NA
DALM000002	Dalmatian	Breed_Dogs	None	NA
DALM000003	Dalmatian	Breed_Dogs	None	NA
DALM000004	Dalmatian	Breed_Dogs	None	NA
DALM000005	Dalmatian	Breed_Dogs	None	NA
DAND000001	Dandie Dinmont Terrier	Breed_Dogs	Scottish Terriers	NA
DAND000002	Dandie Dinmont Terrier	Breed_Dogs	Scottish Terriers	NA
DAND000003	Dandie Dinmont Terrier	Breed_Dogs	Scottish Terriers	NA
DAND000004	Dandie Dinmont Terrier	Breed_Dogs	Scottish Terriers	NA
DAND000005	Dandie Dinmont Terrier	Breed_Dogs	Scottish Terriers	NA
DAND000006	Dandie Dinmont Terrier	Breed_Dogs	Scottish Terriers	NA
DARG000001	Dogo Argentino	Breed_Dogs	Mastiffs	Bull Terriers
DARG000002	Dogo Argentino	Breed_Dogs	Mastiffs	Bull Terriers
DARG000003	Dogo Argentino	Breed_Dogs	Mastiffs	Bull Terriers
DARG000004	Dogo Argentino	Breed_Dogs	Mastiffs	Bull Terriers
DARG000005	Dogo Argentino	Breed_Dogs	Mastiffs	Bull Terriers
DDBX000001	Dogue de Bordeaux	Breed_Dogs	Mastiffs	Bull Terriers
DDBX000002	Dogue de Bordeaux	Breed_Dogs	Mastiffs	Bull Terriers
DDBX000003	Dogue de Bordeaux	Breed_Dogs	Mastiffs	Bull Terriers
DDBX000004	Dogue de Bordeaux	Breed_Dogs	Mastiffs	Bull Terriers
DDBX000005	Dogue de Bordeaux	Breed_Dogs	Mastiffs	Bull Terriers
DEER000001	Scottish Deerhound	Breed_Dogs	Flockguard Sighthound	United Kingdom
DEER000002	Scottish Deerhound	Breed_Dogs	Flockguard Sighthound	United Kingdom
DEER000003	Scottish Deerhound	Breed_Dogs	Flockguard Sighthound	United Kingdom
DEER000004	Scottish Deerhound	Breed_Dogs	Flockguard Sighthound	United Kingdom
DOBP000001	Doberman Pinscher	Breed_Dogs	Black and Tan Terriers	NA
DOBP000002	Doberman Pinscher	Breed_Dogs	Black and Tan Terriers	NA
DOBP000003	Doberman Pinscher	Breed_Dogs	Black and Tan Terriers	NA
DOBP000004	Doberman Pinscher	Breed_Dogs	Black and Tan Terriers	NA
DOBP000005	Doberman Pinscher	Breed_Dogs	Black and Tan Terriers	NA
DOBP000006	Doberman Pinscher	Breed_Dogs	Black and Tan Terriers	NA
DOBP000007	Doberman Pinscher	Breed_Dogs	Black and Tan Terriers	NA
DREV000001	Drever	Breed_Dogs	Scenthounds	German
DREV000002	Drever	Breed_Dogs	Scenthounds	German
DREV000003	Drever	Breed_Dogs	Scenthounds	German
DREV000004	Drever	Breed_Dogs	Scenthounds	German
DREV000005	Drever	Breed_Dogs	Scenthounds	German
DREV000006	Drever	Breed_Dogs	Scenthounds	German
DSFD000001	Danish-Swedish Farmdog	Breed_Dogs	American Terriers	NA
DSFD000002	Danish-Swedish Farmdog	Breed_Dogs	American Terriers	NA
DSFD000003	Danish-Swedish Farmdog	Breed_Dogs	American Terriers	NA
DSFD000004	Danish-Swedish Farmdog	Breed_Dogs	American Terriers	NA
DSFD000005	Danish-Swedish Farmdog	Breed_Dogs	American Terriers	NA
DSFD000006	Danish-Swedish Farmdog	Breed_Dogs	American Terriers	NA
DSHP000001	Unknown	Breed_Dogs	n.d.	NA
DSHP000002	Dutch Shepherd	Breed_Dogs	Belgian Herders	NA
DSHP000003	Dutch Shepherd	Breed_Dogs	Belgian Herders	NA
DSHP000004	Dutch Shepherd	Breed_Dogs	Belgian Herders	NA
DSHP000005	Dutch Shepherd	Breed_Dogs	Belgian Herders	NA
DSHP000006	Dutch Shepherd	Breed_Dogs	Belgian Herders	NA
DUPD000001	Dutch Partridge Dog	Breed_Dogs	Pointers	Long-haired
ECKR000001	English Cocker Spaniel	Breed_Dogs	Spaniels	Flushing
ECKR000002	English Cocker Spaniel	Breed_Dogs	Spaniels	Flushing
ECKR000003	English Cocker Spaniel	Breed_Dogs	Spaniels	Flushing
EEUS000001	East-European shepherd	Breed_Dogs	German Shepherds	NA
EEUS000002	East-European shepherd	Breed_Dogs	German Shepherds	NA
EEUS000003	East-European shepherd	Breed_Dogs	German Shepherds	NA
EFXH000002	English Foxhound	Breed_Dogs	Scenthounds	French-English
EFXH000003	English Foxhound	Breed_Dogs	Scenthounds	French-English
EGTT000001	English Toy Spaniel	Breed_Dogs	Spaniels	Flushing
EGTT000002	English Toy Spaniel	Breed_Dogs	Spaniels	Flushing
EGTT000003	English Toy Spaniel	Breed_Dogs	Spaniels	Flushing
EGTT000004	English Shepherd	Breed_Dogs	UK Herding	NA
EGTT000005	English Shepherd	Breed_Dogs	UK Herding	NA
EGTT000006	English Shepherd	Breed_Dogs	UK Herding	NA
EGTT000007	English Toy Terrier	Breed_Dogs	Black and Tan Terriers	NA
EGTT000008	English Toy Terrier	Breed_Dogs	Black and Tan Terriers	NA
EGTT000009	English Toy Terrier	Breed_Dogs	Black and Tan Terriers	NA
EGTT000010	English Toy Terrier	Breed_Dogs	Black and Tan Terriers	NA
EGTT000011	English Toy Terrier	Breed_Dogs	Black and Tan Terriers	NA
EGTT000012	English Toy Terrier	Breed_Dogs	Black and Tan Terriers	NA
EGTT000013	English Toy Terrier	Breed_Dogs	Black and Tan Terriers	NA
EGTT000014	English Toy Terrier	Breed_Dogs	Black and Tan Terriers	NA
EGTT000015	English Toy Terrier	Breed_Dogs	Black and Tan Terriers	NA
EGTT000016	English Toy Terrier	Breed_Dogs	Black and Tan Terriers	NA
ELOD000001	Elo	Breed_Dogs	Asian	Asian Spitz
ELOD000002	Elo	Breed_Dogs	Asian	Asian Spitz
ELOD000003	Elo	Breed_Dogs	Asian	Asian Spitz
ELOD000004	Elo	Breed_Dogs	Asian	Asian Spitz
ELOD000005	Elo	Breed_Dogs	Asian	Asian Spitz
ENTB000001	Entlebucher Mountain Dog	Breed_Dogs	Alpine	NA
ENTB000002	Entlebucher Mountain Dog	Breed_Dogs	Alpine	NA
ENTB000003	Entlebucher Mountain Dog	Breed_Dogs	Alpine	NA
ENTB000004	Entlebucher Mountain Dog	Breed_Dogs	Alpine	NA
ENTB000005	Entlebucher Mountain Dog	Breed_Dogs	Alpine	NA
ENTB000006	Entlebucher Mountain Dog	Breed_Dogs	Alpine	NA
ENTB000007	Entlebucher Mountain Dog	Breed_Dogs	Alpine	NA
ENTB000008	Entlebucher Mountain Dog	Breed_Dogs	Alpine	NA
ENTB000009	Entlebucher Mountain Dog	Breed_Dogs	Alpine	NA
EPNT000001	English Pointer	Breed_Dogs	Pointers	Short-haired
EPNT000002	English Pointer	Breed_Dogs	Pointers	Short-haired
EPNT000003	English Pointer	Breed_Dogs	Pointers	Short-haired
EPNT000004	English Pointer	Breed_Dogs	Pointers	Short-haired
EPNT000005	English Pointer	Breed_Dogs	Pointers	Short-haired
EPNT000006	English Pointer	Breed_Dogs	Pointers	Short-haired
EPNT000007	English Pointer	Breed_Dogs	Pointers	Short-haired
EPNT000008	English Pointer	Breed_Dogs	Pointers	Short-haired
EPNT000009	Unknown	Breed_Dogs	n.d.	NA
ESET000001	English Setter	Breed_Dogs	Pointers	Setter
ESET000002	English Setter	Breed_Dogs	Pointers	Setter
ESET000004	English Setter	Breed_Dogs	Pointers	Setter
ESMD000001	Estrela Mountain Dog	Breed_Dogs	Flockguard Sighthound	Iberian
ESMD000002	Estrela Mountain Dog	Breed_Dogs	Flockguard Sighthound	Iberian
ESMD000003	Estrela Mountain Dog	Breed_Dogs	Flockguard Sighthound	Iberian
ESMD000004	Estrela Mountain Dog	Breed_Dogs	Flockguard Sighthound	Iberian
ESMD000005	Estrela Mountain Dog	Breed_Dogs	Flockguard Sighthound	Iberian
ESMD000006	Estrela Mountain Dog	Breed_Dogs	Flockguard Sighthound	Iberian
ESSP000001	English Springer Spaniel	Breed_Dogs	Spaniels	Flushing
ESSP000002	English Springer Spaniel	Breed_Dogs	Spaniels	Flushing
ESSP000003	English Springer Spaniel	Breed_Dogs	Spaniels	Flushing
ESTH000001	Estonian Hound	Breed_Dogs	Scenthounds	Scenthound
ESTH000002	Estonian Hound	Breed_Dogs	Scenthounds	Scenthound
ESTH000003	Estonian Hound	Breed_Dogs	Scenthounds	Scenthound
EURA000001	Eurasier	Breed_Dogs	Asian	Asian Spitz
EURA000002	Eurasier	Breed_Dogs	Asian	Asian Spitz
EURA000003	Eurasier	Breed_Dogs	Asian	Asian Spitz
EURA000004	Eurasier	Breed_Dogs	Asian	Asian Spitz
FBUL000001	French Bulldog	Breed_Dogs	Mastiffs	Bull Terriers
FBUL000002	French Bulldog	Breed_Dogs	Mastiffs	Bull Terriers
FBUL000003	French Bulldog	Breed_Dogs	Mastiffs	Bull Terriers
FBUL000004	French Bulldog	Breed_Dogs	Mastiffs	Bull Terriers
FBUL000005	French Bulldog	Breed_Dogs	Mastiffs	Bull Terriers
FBUL000006	French Bulldog	Breed_Dogs	Mastiffs	Bull Terriers
FIEL000001	Field Spaniel	Breed_Dogs	Spaniels	Flushing
FIEL000002	Field Spaniel	Breed_Dogs	Spaniels	Flushing
FIEL000003	Field Spaniel	Breed_Dogs	Spaniels	Flushing
FIEL000004	Field Spaniel	Breed_Dogs	Spaniels	Flushing
FIEL000005	Field Spaniel	Breed_Dogs	Spaniels	Flushing
FINH000001	Finnish Hound	Breed_Dogs	Scenthounds	Baltic
FINH000002	Finnish Hound	Breed_Dogs	Scenthounds	Baltic
FINH000003	Finnish Hound	Breed_Dogs	Scenthounds	Baltic
FINH000004	Finnish Hound	Breed_Dogs	Scenthounds	Baltic
FINH000005	Finnish Hound	Breed_Dogs	Scenthounds	Baltic
FINH000006	Finnish Hound	Breed_Dogs	Scenthounds	Baltic
FINS000001	Finnish Spitz	Breed_Dogs	Spitz	Nordic Spitz
FINS000002	Finnish Spitz	Breed_Dogs	Spitz	Nordic Spitz
FINS000003	Finnish Spitz	Breed_Dogs	Spitz	Nordic Spitz
FINS000004	Finnish Spitz	Breed_Dogs	Spitz	Nordic Spitz
FINS000005	Finnish Spitz	Breed_Dogs	Spitz	Nordic Spitz
FINS000006	Finnish Spitz	Breed_Dogs	Spitz	Nordic Spitz
FLCD000001	Bouvier des Flandres	Breed_Dogs	Belgian Herders	NA
FLCD000002	Bouvier des Flandres	Breed_Dogs	Belgian Herders	NA
FLCD000003	Bouvier des Flandres	Breed_Dogs	Belgian Herders	NA
FLCD000004	Bouvier des Flandres	Breed_Dogs	Belgian Herders	NA
FLCD000005	Bouvier des Flandres	Breed_Dogs	Belgian Herders	NA
FLCD000006	Bouvier des Flandres	Breed_Dogs	Belgian Herders	NA
FLCD000007	Bouvier des Flandres	Breed_Dogs	Belgian Herders	NA
FLCD000008	Bouvier des Flandres	Breed_Dogs	Belgian Herders	NA
FLCR000001	Flat-Coated Retriever	Breed_Dogs	Retriever	NA
FLCR000002	Flat-Coated Retriever	Breed_Dogs	Retriever	NA
FLCR000003	Flat-Coated Retriever	Breed_Dogs	Retriever	NA
FOMD000001	Formosan Mountain Dog	Breed_Dogs	Asian	Asian Spitz
FOMD000002	Formosan Mountain Dog	Breed_Dogs	Asian	Asian Spitz
FOMD000003	Formosan Mountain Dog	Breed_Dogs	Asian	Asian Spitz
FRSP000001	French Spaniel	Breed_Dogs	Pointers	Setter
FRSP000002	French Spaniel	Breed_Dogs	Pointers	Setter
FRSP000003	French Spaniel	Breed_Dogs	Pointers	Setter
FRSP000004	French Spaniel	Breed_Dogs	Pointers	Setter
FRSP000005	French Spaniel	Breed_Dogs	Pointers	Setter
FRSP000006	French Spaniel	Breed_Dogs	Pointers	Setter
FXTE000001	Wire Fox Terrier	Breed_Dogs	English Terriers	NA
FXTE000002	Wire Fox Terrier	Breed_Dogs	English Terriers	NA
FXTE000003	Smooth Fox Terrier	Breed_Dogs	English Terriers	NA
FXTE000004	Smooth Fox Terrier	Breed_Dogs	English Terriers	NA
FXTE000005	Smooth Fox Terrier	Breed_Dogs	English Terriers	NA
FXTE000006	Smooth Fox Terrier	Breed_Dogs	English Terriers	NA
FXTE000007	Unknown	Breed_Dogs	n.d.	NA
FXTE000008	Fox Terrier	Mixed/Other	n.d.	NA
FXTE000009	Fox Terrier	Mixed/Other	n.d.	NA
GAFT000001	Great Anglo-French Tricolour Hound	Breed_Dogs	Scenthounds	French-English
GAFT000002	Great Anglo-French Tricolour Hound	Breed_Dogs	Scenthounds	French-English
GAFT000003	Great Anglo-French Tricolour Hound	Breed_Dogs	Scenthounds	French-English
GAFT000004	Great Anglo-French Tricolour Hound	Breed_Dogs	Scenthounds	French-English
GAFT000005	Great Anglo-French Tricolour Hound	Breed_Dogs	Scenthounds	French-English
GAFT000006	Great Anglo-French Tricolour Hound	Breed_Dogs	Scenthounds	French-English
GALG000001	Galgo Espanol	Breed_Dogs	Flockguard Sighthound	United Kingdom
GALG000002	Galgo Espanol	Breed_Dogs	Flockguard Sighthound	United Kingdom
GALG000003	Galgo Espanol	Breed_Dogs	Flockguard Sighthound	United Kingdom
GALG000004	Galgo Espanol	Breed_Dogs	Flockguard Sighthound	United Kingdom
GALG000005	Galgo Espanol	Breed_Dogs	Flockguard Sighthound	United Kingdom
GALG000006	Galgo Espanol	Breed_Dogs	Flockguard Sighthound	United Kingdom
GAWO000001	Great Anglo-French White and Orange Hound	Breed_Dogs	Scenthounds	French-English
GAWO000002	Great Anglo-French White and Orange Hound	Breed_Dogs	Scenthounds	French-English
GAWO000003	Great Anglo-French White and Orange Hound	Breed_Dogs	Scenthounds	French-English
GAWO000004	Great Anglo-French White and Orange Hound	Breed_Dogs	Scenthounds	French-English
GAWO000005	Great Anglo-French White and Orange Hound	Breed_Dogs	Scenthounds	French-English
GAWO000006	Great Anglo-French White and Orange Hound	Breed_Dogs	Scenthounds	French-English
GBGA000001	Grand Bleu de Gascogne	Breed_Dogs	Scenthounds	French-English
GBGV000001	Grand Basset Griffon Vendeen	Breed_Dogs	Scenthounds	French-English
GBGV000002	Grand Basset Griffon Vendeen	Breed_Dogs	Scenthounds	French-English
GBGV000003	Grand Basset Griffon Vendeen	Breed_Dogs	Scenthounds	French-English
GBGV000004	Grand Basset Griffon Vendeen	Breed_Dogs	Scenthounds	French-English
GBGV000005	Grand Basset Griffon Vendeen	Breed_Dogs	Scenthounds	French-English
GFBR000001	Griffon Fauve de Bretagne	Breed_Dogs	Scenthounds	French-English
GGVE000001	Grand Griffon Vendeen	Breed_Dogs	Scenthounds	French-English
GGVE000002	Grand Griffon Vendeen	Breed_Dogs	Scenthounds	French-English
GHND000001	German Hound	Breed_Dogs	Scenthounds	German
GHND000002	German Hound	Breed_Dogs	Scenthounds	German
GHND000003	German Hound	Breed_Dogs	Scenthounds	German
GHND000004	German Hound	Breed_Dogs	Scenthounds	German
GHND000005	German Hound	Breed_Dogs	Scenthounds	German
GHND000006	German Hound	Breed_Dogs	Scenthounds	German
GHUT000001	German Hunting Terrier	Breed_Dogs	English Terriers	NA
GHUT000002	German Hunting Terrier	Breed_Dogs	English Terriers	NA
GHUT000003	German Hunting Terrier	Breed_Dogs	English Terriers	NA
GHUT000004	German Hunting Terrier	Breed_Dogs	English Terriers	NA
GHUT000005	German Hunting Terrier	Breed_Dogs	English Terriers	NA
GHUT000006	German Hunting Terrier	Breed_Dogs	English Terriers	NA
GLEN000001	Glen of Imaal Terrier	Breed_Dogs	Irish Terriers	NA
GLEN000002	Glen of Imaal Terrier	Breed_Dogs	Irish Terriers	NA
GLEN000003	Glen of Imaal Terrier	Breed_Dogs	Irish Terriers	NA
GLEN000004	Glen of Imaal Terrier	Breed_Dogs	Irish Terriers	NA
GLEN000005	Glen of Imaal Terrier	Breed_Dogs	Irish Terriers	NA
GLEN000006	Glen of Imaal Terrier	Breed_Dogs	Irish Terriers	NA
GMSP000001	German Spaniel	Breed_Dogs	Spaniels	Flushing
GMSP000002	German Spaniel	Breed_Dogs	Spaniels	Flushing
GMSP000003	German Spaniel	Breed_Dogs	Spaniels	Flushing
GMSP000004	German Spaniel	Breed_Dogs	Spaniels	Flushing
GMSP000005	German Spaniel	Breed_Dogs	Spaniels	Flushing
GMSP000006	German Spaniel	Breed_Dogs	Spaniels	Flushing
GOLD000001	Golden Retriever	Breed_Dogs	Retriever	NA
GOLD000002	Golden Retriever	Breed_Dogs	Retriever	NA
GOLD000003	Golden Retriever	Breed_Dogs	Retriever	NA
GOLD000004	Golden Retriever	Breed_Dogs	Retriever	NA
GOLD000005	Golden Retriever	Breed_Dogs	Retriever	NA
GOLD000007	Golden Retriever	Breed_Dogs	Retriever	NA
GORD000002	Gordon Setter	Breed_Dogs	Pointers	Setter
GPIN000001	German Pinscher	Breed_Dogs	Pinscher	NA
GPIN000002	German Pinscher	Breed_Dogs	Pinscher	NA
GPIN000003	German Pinscher	Breed_Dogs	Pinscher	NA
GPIN000004	German Pinscher	Breed_Dogs	Pinscher	NA
GPYR000001	Great Pyrenees	Breed_Dogs	Flockguard Sighthound	Iberian
GPYR000002	Great Pyrenees	Breed_Dogs	Flockguard Sighthound	Iberian
GPYR000003	Great Pyrenees	Breed_Dogs	Flockguard Sighthound	Iberian
GPYR000004	Great Pyrenees	Breed_Dogs	Flockguard Sighthound	Iberian
GPYR000005	Great Pyrenees	Breed_Dogs	Flockguard Sighthound	Iberian
GPYR000006	Great Pyrenees	Breed_Dogs	Flockguard Sighthound	Iberian
GREE000001	Greenland Dog	Breed_Dogs	Asian	Asian Spitz
GREE000002	Greenland Dog	Breed_Dogs	Asian	Asian Spitz
GREE000003	Greenland Dog	Breed_Dogs	Asian	Asian Spitz
GRIF000001	Griffon	Breed_Dogs	n.d.	NA
GRIF000002	Griffon	Breed_Dogs	n.d.	NA
GRND000001	Groenendael	Breed_Dogs	Belgian Herders	NA
GRND000002	Groenendael	Breed_Dogs	Belgian Herders	NA
GRND000003	Groenendael	Breed_Dogs	Belgian Herders	NA
GRNI000001	Griffon Nivernais	Breed_Dogs	Scenthounds	French-English
GRNI000002	Griffon Nivernais	Breed_Dogs	Scenthounds	French-English
GRNI000003	Griffon Nivernais	Breed_Dogs	Scenthounds	French-English
GRNI000004	Griffon Nivernais	Breed_Dogs	Scenthounds	French-English
GRNI000005	Griffon Nivernais	Breed_Dogs	Scenthounds	French-English
GRNI000006	Griffon Nivernais	Breed_Dogs	Scenthounds	French-English
GRSD000001	German Shepherd Dog	Breed_Dogs	German Shepherds	NA
GRSD000002	German Shepherd Dog	Breed_Dogs	German Shepherds	NA
GRSD000003	German Shepherd Dog	Breed_Dogs	German Shepherds	NA
GSHP000001	German Shorthaired Pointer	Breed_Dogs	Pointers	Short-haired
GSHP000002	German Shorthaired Pointer	Breed_Dogs	Pointers	Short-haired
GSHP000003	German Shorthaired Pointer	Breed_Dogs	Pointers	Short-haired
GSHP000004	German Shorthaired Pointer	Breed_Dogs	Pointers	Short-haired
GSMD000001	Greater Swiss Mountain Dog	Breed_Dogs	Alpine	NA
GSMD000002	Greater Swiss Mountain Dog	Breed_Dogs	Alpine	NA
GSMD000003	Greater Swiss Mountain Dog	Breed_Dogs	Alpine	NA
GSMD000004	Greater Swiss Mountain Dog	Breed_Dogs	Alpine	NA
GSMD000005	Greater Swiss Mountain Dog	Breed_Dogs	Alpine	NA
GSMD000006	Greater Swiss Mountain Dog	Breed_Dogs	Alpine	NA
GSMD000007	Greater Swiss Mountain Dog	Breed_Dogs	Alpine	NA
GSMD000008	Greater Swiss Mountain Dog	Breed_Dogs	Alpine	NA
GSMD000009	Greater Swiss Mountain Dog	Breed_Dogs	Alpine	NA
GSMD000010	Greater Swiss Mountain Dog	Breed_Dogs	Alpine	NA
GSNZ000001	Giant Schnauzer	Breed_Dogs	Multi Purpose	NA
GSNZ000002	Giant Schnauzer	Breed_Dogs	Multi Purpose	NA
GSNZ000003	Giant Schnauzer	Breed_Dogs	Multi Purpose	NA
GSNZ000004	Giant Schnauzer	Breed_Dogs	Multi Purpose	NA
GSNZ000005	Giant Schnauzer	Breed_Dogs	Multi Purpose	NA
GSNZ000006	Giant Schnauzer	Breed_Dogs	Multi Purpose	NA
GSPK000001	German Spitz Klein	Breed_Dogs	Spitz	German Spitz
GSPK000002	German Spitz Klein	Breed_Dogs	Spitz	German Spitz
GSPK000003	German Spitz Klein	Breed_Dogs	Spitz	German Spitz
GSPK000004	German Spitz Klein	Breed_Dogs	Spitz	German Spitz
GSPK000005	German Spitz Klein	Breed_Dogs	Spitz	German Spitz
GSPK000006	German Spitz Klein	Breed_Dogs	Spitz	German Spitz
GSPK000007	German Spitz Klein	Breed_Dogs	Spitz	German Spitz
GSPK000008	German Spitz Klein	Breed_Dogs	Spitz	German Spitz
GSPK000009	German Spitz Klein	Breed_Dogs	Spitz	German Spitz
GSPK000010	German Spitz Klein	Breed_Dogs	Spitz	German Spitz
GSPK000011	German Spitz Klein	Breed_Dogs	Spitz	German Spitz
GSPZ000001	German Spitz	Breed_Dogs	Spitz	German Spitz
GSPZ000002	German Spitz	Breed_Dogs	Spitz	German Spitz
GSPZ000003	German Spitz	Breed_Dogs	Spitz	German Spitz
GSPZ000004	German Spitz	Breed_Dogs	Spitz	German Spitz
GSPZ000005	German Spitz	Breed_Dogs	Spitz	German Spitz
GSPZ000006	German Spitz	Breed_Dogs	Spitz	German Spitz
GSZG000001	German Giant Spitz	Breed_Dogs	Spitz	German Spitz
GSZG000002	German Giant Spitz	Breed_Dogs	Spitz	German Spitz
GSZG000003	German Giant Spitz	Breed_Dogs	Spitz	German Spitz
GSZG000004	German Giant Spitz	Breed_Dogs	Spitz	German Spitz
GSZG000005	German Giant Spitz	Breed_Dogs	Spitz	German Spitz
GSZG000006	German Giant Spitz	Breed_Dogs	Spitz	German Spitz
GSZG000007	Pomeranian	Breed_Dogs	Spitz	German Spitz
GSZM000001	German Spitz Mittel	Breed_Dogs	Spitz	German Spitz
GSZM000002	German Spitz Mittel	Breed_Dogs	Spitz	German Spitz
GSZM000003	German Spitz Mittel	Breed_Dogs	Spitz	German Spitz
GSZM000004	German Spitz Mittel	Breed_Dogs	Spitz	German Spitz
GSZM000005	German Spitz Mittel	Breed_Dogs	Spitz	German Spitz
GSZM000006	German Spitz Mittel	Breed_Dogs	Spitz	German Spitz
GSZM000007	German Spitz Mittel	Breed_Dogs	Spitz	German Spitz
GSZM000008	German Spitz Mittel	Breed_Dogs	Spitz	German Spitz
GSZM000009	German Spitz Mittel	Breed_Dogs	Spitz	German Spitz
GSZM000010	German Spitz Mittel	Breed_Dogs	Spitz	German Spitz
GSZM000011	German Spitz Mittel	Breed_Dogs	Spitz	German Spitz
GSZM000012	German Spitz Mittel	Breed_Dogs	Spitz	German Spitz
GTLH000001	Gotland Hound	Breed_Dogs	Scenthounds	Baltic
GWHP000001	German Wirehaired Pointer	Breed_Dogs	Pointers	Wire-haired
GWHP000002	German Wirehaired Pointer	Breed_Dogs	Pointers	Wire-haired
GWHP000003	German Wirehaired Pointer	Breed_Dogs	Pointers	Wire-haired
GWHP000004	German Wirehaired Pointer	Breed_Dogs	Pointers	Wire-haired
GWHP000005	German Wirehaired Pointer	Breed_Dogs	Pointers	Wire-haired
HAEL000001	Hallefors Elkhound	Breed_Dogs	Spitz	Nordic Spitz
HARR000001	Harrier	Breed_Dogs	Scenthounds	French-English
HARR000002	Harrier	Breed_Dogs	Scenthounds	French-English
HARR000003	Harrier	Breed_Dogs	Scenthounds	French-English
HAVA000001	Havanese	Breed_Dogs	Asian	Bichons
HAVA000002	Havanese	Breed_Dogs	Asian	Bichons
HAVA000003	Havanese	Breed_Dogs	Asian	Bichons
HELH000001	Hellenic Hound	Breed_Dogs	Scenthounds	Mediterranean
HOBO000001	Hortaya Borzaya	Breed_Dogs	Flockguard Sighthound	United Kingdom
HOBO000002	Hortaya Borzaya	Breed_Dogs	Flockguard Sighthound	United Kingdom
HOKK000001	Hokkaido	Breed_Dogs	Asian	Asian Spitz
HOKK000002	Hokkaido	Breed_Dogs	Asian	Asian Spitz
HOKK000003	Hokkaido	Breed_Dogs	Asian	Asian Spitz
HOVA000001	Hovawart	Breed_Dogs	None	NA
HOVA000002	Hovawart	Breed_Dogs	None	NA
HOVA000003	Hovawart	Breed_Dogs	None	NA
HOVA000004	Hovawart	Breed_Dogs	None	NA
HSHP000001	Vizsla	Breed_Dogs	Pointers	Short-haired
HSHP000002	Vizsla	Breed_Dogs	Pointers	Short-haired
HTSV000001	Hamiltonstovare	Breed_Dogs	Scenthounds	Baltic
HTSV000002	Hamiltonstovare	Breed_Dogs	Scenthounds	Baltic
HTSV000003	Hamiltonstovare	Breed_Dogs	Scenthounds	Baltic
HTSV000004	Hamiltonstovare	Breed_Dogs	Scenthounds	Baltic
HTSV000005	Hamiltonstovare	Breed_Dogs	Scenthounds	Baltic
HTSV000006	Hamiltonstovare	Breed_Dogs	Scenthounds	Baltic
HTSV000007	Hamiltonstovare	Breed_Dogs	Scenthounds	Baltic
HUNT000001	Huntaway	Breed_Dogs	n.d.	NA
HUNT000002	Huntaway	Breed_Dogs	n.d.	NA
HUNT000003	Huntaway	Breed_Dogs	n.d.	NA
HVSC000001	Hanoverian Scenthound	Breed_Dogs	Scenthounds	Dachshund-like
HWHP000001	Vizsla	Breed_Dogs	Pointers	Short-haired
IBIZ000001	Ibizan Hound	Breed_Dogs	Flockguard Sighthound	Iberian
IBIZ000002	Ibizan Hound	Breed_Dogs	Flockguard Sighthound	Iberian
IBIZ000003	Ibizan Hound	Breed_Dogs	Flockguard Sighthound	Iberian
IBIZ000004	Ibizan Hound	Breed_Dogs	Flockguard Sighthound	Iberian
IBIZ000005	Ibizan Hound	Breed_Dogs	Flockguard Sighthound	Iberian
IBIZ000006	Ibizan Hound	Breed_Dogs	Flockguard Sighthound	Iberian
IBIZ000007	Ibizan Hound	Breed_Dogs	Flockguard Sighthound	Iberian
IBIZ000008	Ibizan Hound	Breed_Dogs	Flockguard Sighthound	Iberian
IBIZ000009	Ibizan Hound	Breed_Dogs	Flockguard Sighthound	Iberian
IBIZ000010	Ibizan Hound	Breed_Dogs	Flockguard Sighthound	Iberian
IBIZ000011	Ibizan Hound	Breed_Dogs	Flockguard Sighthound	Iberian
IBIZ000012	Ibizan Hound	Breed_Dogs	Flockguard Sighthound	Iberian
IBIZ000013	Ibizan Hound	Breed_Dogs	Flockguard Sighthound	Iberian
ICES000001	Icelandic Sheepdog	Breed_Dogs	Spitz	Nordic Spitz
ICES000002	Icelandic Sheepdog	Breed_Dogs	Spitz	Nordic Spitz
ICES000003	Icelandic Sheepdog	Breed_Dogs	Spitz	Nordic Spitz
ICES000004	Icelandic Sheepdog	Breed_Dogs	Spitz	Nordic Spitz
ICES000005	Icelandic Sheepdog	Breed_Dogs	Spitz	Nordic Spitz
ICES000006	Icelandic Sheepdog	Breed_Dogs	Spitz	Nordic Spitz
IRIT000001	Irish Terrier	Breed_Dogs	Irish Terriers	NA
IRIT000002	Irish Terrier	Breed_Dogs	Irish Terriers	NA
IRIT000003	Irish Terrier	Breed_Dogs	Irish Terriers	NA
IRSE000001	Irish Setter	Breed_Dogs	Pointers	Setter
IRSE000002	Irish Setter	Breed_Dogs	Pointers	Setter
IRSE000003	Irish Setter	Breed_Dogs	Pointers	Setter
IRSE000004	Irish Setter	Breed_Dogs	Pointers	Setter
IWSP000001	Irish Water Spaniel	Breed_Dogs	Spaniels	Water
IWSP000002	Irish Water Spaniel	Breed_Dogs	Spaniels	Water
IWSP000003	Irish Water Spaniel	Breed_Dogs	Spaniels	Water
IWSP000004	Irish Water Spaniel	Breed_Dogs	Spaniels	Water
JSPZ000001	Japanese Spitz	Breed_Dogs	Spitz	German Spitz
JSPZ000002	Japanese Spitz	Breed_Dogs	Spitz	German Spitz
JSPZ000003	Japanese Spitz	Breed_Dogs	Spitz	German Spitz
JSPZ000004	Japanese Spitz	Breed_Dogs	Spitz	German Spitz
JSPZ000005	Japanese Spitz	Breed_Dogs	Spitz	German Spitz
JSPZ000006	Japanese Spitz	Breed_Dogs	Spitz	German Spitz
JSPZ000007	Japanese Spitz	Breed_Dogs	Spitz	German Spitz
JSPZ000008	Japanese Spitz	Breed_Dogs	Spitz	German Spitz
JSPZ000009	Japanese Spitz	Breed_Dogs	Spitz	German Spitz
JSPZ000010	Japanese Spitz	Breed_Dogs	Spitz	German Spitz
JSPZ000011	Japanese Spitz	Breed_Dogs	Spitz	German Spitz
JSPZ000012	Japanese Spitz	Breed_Dogs	Spitz	German Spitz
KAIK000001	Kai Ken	Breed_Dogs	Asian	Asian Spitz
KAIK000002	Kai Ken	Breed_Dogs	Asian	Asian Spitz
KAIK000003	Kai Ken	Breed_Dogs	Asian	Asian Spitz
KAIK000004	Kai Ken	Breed_Dogs	Asian	Asian Spitz
KAIK000005	Kai Ken	Breed_Dogs	Asian	Asian Spitz
KANG000001	Kangal	Breed_Dogs	Flockguard Sighthound	Central Asia
KANG000002	Kangal	Breed_Dogs	Flockguard Sighthound	Central Asia
KANG000003	Kangal	Breed_Dogs	Flockguard Sighthound	Central Asia
KARS000001	Kars	Breed_Dogs	Flockguard Sighthound	Central Asia
KARS000002	Kars	Breed_Dogs	Flockguard Sighthound	Central Asia
KARS000003	Kars	Breed_Dogs	Flockguard Sighthound	Central Asia
KARS000004	Kars	Breed_Dogs	Flockguard Sighthound	Central Asia
KARS000005	Kars	Breed_Dogs	Flockguard Sighthound	Central Asia
KARS000006	Kars	Breed_Dogs	Flockguard Sighthound	Central Asia
KEES000001	Keeshond	Breed_Dogs	Spitz	German Spitz
KEES000002	Keeshond	Breed_Dogs	Spitz	German Spitz
KEES000003	Keeshond	Breed_Dogs	Spitz	German Spitz
KEES000004	Keeshond	Breed_Dogs	Spitz	German Spitz
KEES000005	Keeshond	Breed_Dogs	Spitz	German Spitz
KEES000006	Keeshond	Breed_Dogs	Spitz	German Spitz
KEES000007	Keeshond	Breed_Dogs	Spitz	German Spitz
KEES000008	Keeshond	Breed_Dogs	Spitz	German Spitz
KEES000009	Keeshond	Breed_Dogs	Spitz	German Spitz
KEES000010	Keeshond	Breed_Dogs	Spitz	German Spitz
KEES000011	Keeshond	Breed_Dogs	Spitz	German Spitz
KEES000012	Keeshond	Breed_Dogs	Spitz	German Spitz
KERY000001	Kerry Blue Terrier	Breed_Dogs	Irish Terriers	NA
KERY000002	Kerry Blue Terrier	Breed_Dogs	Irish Terriers	NA
KINT000001	Kintamani	Breed_Dogs	Asian	Asian Spitz
KISH000001	Kishu	Breed_Dogs	Asian	Asian Spitz
KISH000002	Kishu	Breed_Dogs	Asian	Asian Spitz
KISH000003	Kishu	Breed_Dogs	Asian	Asian Spitz
KMUM000001	Small Munsterlander	Breed_Dogs	Pointers	Long-haired
KMUM000002	Small Munsterlander	Breed_Dogs	Pointers	Long-haired
KMUM000003	Small Munsterlander	Breed_Dogs	Pointers	Long-haired
KMUM000004	Small Munsterlander	Breed_Dogs	Pointers	Long-haired
KMUM000005	Small Munsterlander	Breed_Dogs	Pointers	Long-haired
KMUM000006	Small Munsterlander	Breed_Dogs	Pointers	Long-haired
KMUM000007	Small Munsterlander	Breed_Dogs	Pointers	Long-haired
KMUM000008	Small Munsterlander	Breed_Dogs	Pointers	Long-haired
KMUM000009	Small Munsterlander	Breed_Dogs	Pointers	Long-haired
KMUM000010	Small Munsterlander	Breed_Dogs	Pointers	Long-haired
KMUM000011	Small Munsterlander	Breed_Dogs	Pointers	Long-haired
KROM000001	Kromfohrlander	Breed_Dogs	None	NA
KROM000002	Kromfohrlander	Breed_Dogs	None	NA
KROM000003	Kromfohrlander	Breed_Dogs	None	NA
KROM000004	Kromfohrlander	Breed_Dogs	None	NA
KROM000005	Kromfohrlander	Breed_Dogs	None	NA
KROM000006	Kromfohrlander	Breed_Dogs	None	NA
KROM000007	Kromfohrlander	Breed_Dogs	None	NA
KUVZ000001	Kuvasz	Breed_Dogs	Hungary	Flockguard
KUVZ000002	Kuvasz	Breed_Dogs	Hungary	Flockguard
KUVZ000003	Kuvasz	Breed_Dogs	Hungary	Flockguard
KUVZ000004	Kuvasz	Breed_Dogs	Hungary	Flockguard
KUVZ000005	Kuvasz	Breed_Dogs	Hungary	Flockguard
KUVZ000006	Kuvasz	Breed_Dogs	Hungary	Flockguard
KUVZ000007	Kuvasz	Breed_Dogs	Hungary	Flockguard
KUVZ000008	Kuvasz	Breed_Dogs	Hungary	Flockguard
LABN000001	Labernese	Mixed/Other	n.d.	NA
LABN000002	Labernese	Mixed/Other	n.d.	NA
LABR000001	Labrador Retriever	Breed_Dogs	Retriever	NA
LABR000002	Labrador Retriever	Breed_Dogs	Retriever	NA
LABR000003	Labrador Retriever	Breed_Dogs	Retriever	NA
LABR000004	Labrador Retriever	Breed_Dogs	Retriever	NA
LABR000005	Labrador Retriever	Breed_Dogs	Retriever	NA
LABR000006	Labrador Retriever	Breed_Dogs	Retriever	NA
LAEK000001	Belgian Laekenois	Breed_Dogs	Belgian Herders	NA
LAEK000002	Belgian Laekenois	Breed_Dogs	Belgian Herders	NA
LAEK000003	Belgian Laekenois	Breed_Dogs	Belgian Herders	NA
LAEK000004	Belgian Laekenois	Breed_Dogs	Belgian Herders	NA
LAEK000005	Belgian Laekenois	Breed_Dogs	Belgian Herders	NA
LAGO000001	Lagotto Romagnolo	Breed_Dogs	Water Dogs	NA
LAGO000002	Lagotto Romagnolo	Breed_Dogs	Water Dogs	NA
LAGO000003	Lagotto Romagnolo	Breed_Dogs	Water Dogs	NA
LAGO000004	Lagotto Romagnolo	Breed_Dogs	Water Dogs	NA
LAKE000001	Lakeland Terrier	Breed_Dogs	English Terriers	NA
LAKE000002	Lakeland Terrier	Breed_Dogs	English Terriers	NA
LAKE000003	Lakeland Terrier	Breed_Dogs	English Terriers	NA
LAKE000004	Lakeland Terrier	Breed_Dogs	English Terriers	NA
LAKE000005	Lakeland Terrier	Breed_Dogs	English Terriers	NA
LAKE000006	Lakeland Terrier	Breed_Dogs	English Terriers	NA
LANC000001	Lancashire Heeler	Breed_Dogs	Australian Terriers	NA
LANC000002	Lancashire Heeler	Breed_Dogs	Australian Terriers	NA
LANC000003	Lancashire Heeler	Breed_Dogs	Australian Terriers	NA
LANC000004	Lancashire Heeler	Breed_Dogs	Australian Terriers	NA
LANC000005	Lancashire Heeler	Breed_Dogs	Australian Terriers	NA
LANC000006	Lancashire Heeler	Breed_Dogs	Australian Terriers	NA
LDSR000001	Landseer	Breed_Dogs	Retriever	NA
LDSR000002	Landseer	Breed_Dogs	Retriever	NA
LDSR000003	Landseer	Breed_Dogs	Retriever	NA
LDSR000004	Landseer	Breed_Dogs	Retriever	NA
LEON000001	Leonberger	Breed_Dogs	Alpine	NA
LEON000002	Leonberger	Breed_Dogs	Alpine	NA
LEON000003	Leonberger	Breed_Dogs	Alpine	NA
LEON000004	Leonberger	Breed_Dogs	Alpine	NA
LEON000007	Leonberger	Breed_Dogs	Alpine	NA
LEON000008	Leonberger	Breed_Dogs	Alpine	NA
LEON000009	Leonberger	Breed_Dogs	Alpine	NA
LEON000010	Leonberger	Breed_Dogs	Alpine	NA
LEON000011	Leonberger	Breed_Dogs	Alpine	NA
LEON000012	Leonberger	Breed_Dogs	Alpine	NA
LEON000013	Leonberger	Breed_Dogs	Alpine	NA
LEON000014	Leonberger	Breed_Dogs	Alpine	NA
LEOP000002	Catahoula Leopard Dog	Breed_Dogs	None	NA
LEOP000003	Catahoula Leopard Dog	Breed_Dogs	None	NA
LEOP000004	Catahoula Leopard Dog	Breed_Dogs	None	NA
LEOP000005	Catahoula Leopard Dog	Breed_Dogs	None	NA
LEOP000007	Catahoula Leopard Dog	Breed_Dogs	None	NA
LEOP000008	Catahoula Leopard Dog	Breed_Dogs	None	NA
LEOP000009	Catahoula Leopard Dog	Breed_Dogs	None	NA
LEOP000010	Catahoula Leopard Dog	Breed_Dogs	None	NA
LHSA000001	Lhasa Apso	Breed_Dogs	Asian	Asian Toy
LHSA000002	Lhasa Apso	Breed_Dogs	Asian	Asian Toy
LHSA000003	Lhasa Apso	Breed_Dogs	Asian	Asian Toy
LHSA000004	Lhasa Apso	Breed_Dogs	Asian	Asian Toy
LHSA000005	Lhasa Apso	Breed_Dogs	Asian	Asian Toy
LHSA000006	Lhasa Apso	Breed_Dogs	Asian	Asian Toy
LHSA000007	Lhasa Apso	Breed_Dogs	Asian	Asian Toy
LHSA000008	Lhasa Apso	Breed_Dogs	Asian	Asian Toy
LMUN000001	Large Munsterlander	Breed_Dogs	Pointers	Long-haired
LOWC000001	Lowchen	Breed_Dogs	Scenthounds	Dachshund-like
LOWC000002	Lowchen	Breed_Dogs	Scenthounds	Dachshund-like
LOWC000003	Lowchen	Breed_Dogs	Scenthounds	Dachshund-like
LOWC000004	Lowchen	Breed_Dogs	Scenthounds	Dachshund-like
MAAG000001	Magyar Agar	Breed_Dogs	Flockguard Sighthound	United Kingdom
MAAG000002	Magyar Agar	Breed_Dogs	Flockguard Sighthound	United Kingdom
MAAG000003	Magyar Agar	Breed_Dogs	Flockguard Sighthound	United Kingdom
MAAG000004	Magyar Agar	Breed_Dogs	Flockguard Sighthound	United Kingdom
MAAG000005	Magyar Agar	Breed_Dogs	Flockguard Sighthound	United Kingdom
MAAG000006	Magyar Agar	Breed_Dogs	Flockguard Sighthound	United Kingdom
MALT000001	Maltese	Breed_Dogs	Asian	Bichons
MALT000002	Maltese	Breed_Dogs	Asian	Bichons
MALT000003	Maltese	Breed_Dogs	Asian	Bichons
MALT000004	Maltese	Breed_Dogs	Asian	Bichons
MALT000005	Coton de Tulear	Breed_Dogs	Asian	Bichons
MANT000001	Manchester Terrier (Standard)	Breed_Dogs	Black and Tan Terriers	NA
MANT000002	Manchester Terrier (Standard)	Breed_Dogs	Black and Tan Terriers	NA
MANT000003	Manchester Terrier (Standard)	Breed_Dogs	Black and Tan Terriers	NA
MANT000004	Manchester Terrier (Standard)	Breed_Dogs	Black and Tan Terriers	NA
MANT000005	Manchester Terrier (Standard)	Breed_Dogs	Black and Tan Terriers	NA
MANT000006	Manchester Terrier (Standard)	Breed_Dogs	Black and Tan Terriers	NA
MANT000007	Manchester Terrier (Standard)	Breed_Dogs	Black and Tan Terriers	NA
MANT000008	Manchester Terrier (Standard)	Breed_Dogs	Black and Tan Terriers	NA
MANT000009	Manchester Terrier (Standard)	Breed_Dogs	Black and Tan Terriers	NA
MARM000001	Maremma Sheepdog	Breed_Dogs	Flockguard Sighthound	NA
MARM000002	Maremma Sheepdog	Breed_Dogs	Flockguard Sighthound	NA
MARM000003	Maremma Sheepdog	Breed_Dogs	Flockguard Sighthound	NA
MARM000004	Maremma Sheepdog	Breed_Dogs	Flockguard Sighthound	NA
MARM000005	Maremma Sheepdog	Breed_Dogs	Flockguard Sighthound	NA
MARM000006	Maremma Sheepdog	Breed_Dogs	Flockguard Sighthound	NA
MAST000001	Mastiff	Breed_Dogs	Mastiffs	English Mastiff
MAST000002	Mastiff	Breed_Dogs	Mastiffs	English Mastiff
MAST000003	Mastiff	Breed_Dogs	Mastiffs	English Mastiff
MAST000004	Mastiff	Breed_Dogs	Mastiffs	English Mastiff
MAST000005	Mastiff	Breed_Dogs	Mastiffs	English Mastiff
MAST000006	Mastiff	Breed_Dogs	Mastiffs	English Mastiff
MBLT000001	Miniature Bull Terrier	Breed_Dogs	Mastiffs	Bull Terriers
MBLT000002	Miniature Bull Terrier	Breed_Dogs	Mastiffs	Bull Terriers
MBLT000003	Miniature Bull Terrier	Breed_Dogs	Mastiffs	Bull Terriers
MBLT000004	Miniature Bull Terrier	Breed_Dogs	Mastiffs	Bull Terriers
MCUR000001	Mountain Cur	Breed_Dogs	n.d.	NA
MCUR000002	Mountain Cur	Breed_Dogs	n.d.	NA
MCUR000003	Mountain Cur	Breed_Dogs	n.d.	NA
MCUR000004	Mountain Cur	Breed_Dogs	n.d.	NA
MJMA000001	Majorca Mastiff	Breed_Dogs	Mastiffs	Bull Terriers
MJMA000002	Majorca Mastiff	Breed_Dogs	Mastiffs	Bull Terriers
MJMA000003	Majorca Mastiff	Breed_Dogs	Mastiffs	Bull Terriers
MOBD000001	Mongolian Bankhar Dog	Village_Dogs	n.d.	NA
MOBD000002	Mongolian Bankhar Dog	Village_Dogs	n.d.	NA
MOBD000003	Mongolian Bankhar Dog	Village_Dogs	n.d.	NA
MOBD000004	Mongolian Bankhar Dog	Village_Dogs	n.d.	NA
MOBD000005	Mongolian Bankhar Dog	Village_Dogs	n.d.	NA
MPIN000001	Miniature Pinscher	Breed_Dogs	Pinscher	NA
MPIN000002	Miniature Pinscher	Breed_Dogs	Pinscher	NA
MPIN000003	Miniature Pinscher	Breed_Dogs	Pinscher	NA
MPIN000004	Miniature Pinscher	Breed_Dogs	Pinscher	NA
MPIN000005	Pinscher	Mixed/Other	n.d.	NA
MPIN000006	Pinscher	Mixed/Other	n.d.	NA
MPIN000007	Unknown	Breed_Dogs	n.d.	NA
MPOO000001	Miniature Poodle	Breed_Dogs	Asian	Bichons
MSNZ000001	Miniature Schnauzer	Breed_Dogs	Spitz	Schnauzer Spitz
MSNZ000002	Miniature Schnauzer	Breed_Dogs	Spitz	Schnauzer Spitz
MSNZ000003	Miniature Schnauzer	Breed_Dogs	Spitz	Schnauzer Spitz
MSNZ000004	Miniature Schnauzer	Breed_Dogs	Spitz	Schnauzer Spitz
MUDI000001	Mudi	Breed_Dogs	Hungary	Herder
MUDI000002	Mudi	Breed_Dogs	Hungary	Herder
MUDI000003	Mudi	Breed_Dogs	Hungary	Herder
MUDI000004	Mudi	Breed_Dogs	Hungary	Herder
MUDI000005	Mudi	Breed_Dogs	Hungary	Herder
MUDI000006	Mudi	Breed_Dogs	Hungary	Herder
NBUH000001	Norwegian Buhund	Breed_Dogs	Spitz	Nordic Spitz
NBUH000002	Norwegian Buhund	Breed_Dogs	Spitz	Nordic Spitz
NBUH000003	Norwegian Buhund	Breed_Dogs	Spitz	Nordic Spitz
NBUH000004	Norwegian Buhund	Breed_Dogs	Spitz	Nordic Spitz
NBUH000005	Norwegian Buhund	Breed_Dogs	Spitz	Nordic Spitz
NBUH000006	Norwegian Buhund	Breed_Dogs	Spitz	Nordic Spitz
NEAP000001	Neapolitan Mastiff	Breed_Dogs	Mastiffs	Italian Mastiff
NEAP000002	Neapolitan Mastiff	Breed_Dogs	Mastiffs	Italian Mastiff
NEAP000003	Neapolitan Mastiff	Breed_Dogs	Mastiffs	Italian Mastiff
NEAP000004	Neapolitan Mastiff	Breed_Dogs	Mastiffs	Italian Mastiff
NEAP000005	Neapolitan Mastiff	Breed_Dogs	Mastiffs	Italian Mastiff
NELK000001	Norwegian Elkhound	Breed_Dogs	Spitz	Nordic Spitz
NELK000002	Norwegian Elkhound	Breed_Dogs	Spitz	Nordic Spitz
NELK000003	Norwegian Elkhound	Breed_Dogs	Spitz	Nordic Spitz
NELK000004	Norwegian Elkhound	Breed_Dogs	Spitz	Nordic Spitz
NELK000005	Norwegian Elkhound	Breed_Dogs	Spitz	Nordic Spitz
NELK000006	Norwegian Elkhound	Breed_Dogs	Spitz	Nordic Spitz
NELK000007	Norwegian Elkhound	Breed_Dogs	Spitz	Nordic Spitz
NEWF000001	Newfoundland	Breed_Dogs	Retriever	NA
NEWF000002	Newfoundland	Breed_Dogs	Retriever	NA
NEWF000003	Newfoundland	Breed_Dogs	Retriever	NA
NEWF000004	Newfoundland	Breed_Dogs	Retriever	NA
NEWF000005	Newfoundland	Breed_Dogs	Retriever	NA
NEWF000006	Newfoundland	Breed_Dogs	Retriever	NA
NLUN000001	Norwegian Lundehund	Breed_Dogs	Scottish Terriers	NA
NLUN000002	Norwegian Lundehund	Breed_Dogs	Scottish Terriers	NA
NLUN000003	Norwegian Lundehund	Breed_Dogs	Scottish Terriers	NA
NLUN000004	Norwegian Lundehund	Breed_Dogs	Scottish Terriers	NA
NLUN000005	Norwegian Lundehund	Breed_Dogs	Scottish Terriers	NA
NORB000001	Norrbottenspitz	Breed_Dogs	Spitz	Nordic Spitz
NORB000002	Norrbottenspitz	Breed_Dogs	Spitz	Nordic Spitz
NORB000003	Norrbottenspitz	Breed_Dogs	Spitz	Nordic Spitz
NORB000004	Norrbottenspitz	Breed_Dogs	Spitz	Nordic Spitz
NORB000005	Norrbottenspitz	Breed_Dogs	Spitz	Nordic Spitz
NORF000001	Norfolk Terrier	Breed_Dogs	Scottish Terriers	NA
NORF000002	Norfolk Terrier	Breed_Dogs	Scottish Terriers	NA
NORF000003	Norfolk Terrier	Breed_Dogs	Scottish Terriers	NA
NORF000004	Norfolk Terrier	Breed_Dogs	Scottish Terriers	NA
NORF000005	Norfolk Terrier	Breed_Dogs	Scottish Terriers	NA
NORF000006	Norfolk Terrier	Breed_Dogs	Scottish Terriers	NA
NORF000007	Norfolk Terrier	Breed_Dogs	Scottish Terriers	NA
NOWT000001	Norwich Terrier	Breed_Dogs	Scottish Terriers	NA
NOWT000002	Norwich Terrier	Breed_Dogs	Scottish Terriers	NA
NOWT000003	Norwich Terrier	Breed_Dogs	Scottish Terriers	NA
NOWT000004	Norwich Terrier	Breed_Dogs	Scottish Terriers	NA
NOWT000005	Norwich Terrier	Breed_Dogs	Scottish Terriers	NA
NOWT000006	Norwich Terrier	Breed_Dogs	Scottish Terriers	NA
NSDT000001	Nova Scotia Duck Tolling Retriever	Breed_Dogs	None	NA
NSDT000002	Nova Scotia Duck Tolling Retriever	Breed_Dogs	None	NA
NSDT000003	Nova Scotia Duck Tolling Retriever	Breed_Dogs	None	NA
NSDT000004	Nova Scotia Duck Tolling Retriever	Breed_Dogs	None	NA
OEBD000001	Olde English Bulldogge	Breed_Dogs	Mastiffs	Bull Terriers
OEBD000002	Olde English Bulldogge	Breed_Dogs	Mastiffs	Bull Terriers
OEBD000003	Olde English Bulldogge	Breed_Dogs	Mastiffs	Bull Terriers
OLES000001	Old English Sheepdog	Breed_Dogs	UK Herding	NA
OLES000002	Old English Sheepdog	Breed_Dogs	UK Herding	NA
OLES000003	Old English Sheepdog	Breed_Dogs	UK Herding	NA
OLES000004	Old English Sheepdog	Breed_Dogs	UK Herding	NA
OLES000005	Old English Sheepdog	Breed_Dogs	UK Herding	NA
OLES000006	Old English Sheepdog	Breed_Dogs	UK Herding	NA
OLES000007	Old English Sheepdog	Breed_Dogs	UK Herding	NA
OLGS000001	Old German Shepherd	Breed_Dogs	None	NA
OLGS000002	Old German Shepherd	Breed_Dogs	None	NA
OLGS000003	Old German Shepherd	Breed_Dogs	None	NA
OLGS000004	Old German Shepherd	Breed_Dogs	None	NA
OLGS000005	Old German Shepherd	Breed_Dogs	None	NA
OLGS000006	Old German Shepherd	Breed_Dogs	None	NA
OTTR000001	Otterhound	Breed_Dogs	Scenthounds	American
OTTR000002	Otterhound	Breed_Dogs	Scenthounds	American
OTTR000003	Otterhound	Breed_Dogs	Scenthounds	American
OTTR000004	Otterhound	Breed_Dogs	Scenthounds	American
OTTR000005	Otterhound	Breed_Dogs	Scenthounds	American
OTTR000006	Otterhound	Breed_Dogs	Scenthounds	American
OTTR000007	Otterhound	Breed_Dogs	Scenthounds	American
PAPI000001	Continental Toy Spaniel (Papillon)	Breed_Dogs	None	NA
PAPI000002	Continental Toy Spaniel (Papillon)	Breed_Dogs	None	NA
PAPI000003	Continental Toy Spaniel (Papillon)	Breed_Dogs	None	NA
PAPI000004	Continental Toy Spaniel (Papillon)	Breed_Dogs	None	NA
PAPI000005	Continental Toy Spaniel (Papillon)	Breed_Dogs	None	NA
PAPI000006	Continental Toy Spaniel (Papillon)	Breed_Dogs	None	NA
PARS000001	Parson Russell Terrier	Breed_Dogs	English Terriers	NA
PARS000002	Parson Russell Terrier	Breed_Dogs	English Terriers	NA
PARS000003	Parson Russell Terrier	Breed_Dogs	English Terriers	NA
PARS000004	Parson Russell Terrier	Breed_Dogs	English Terriers	NA
PARS000005	Parson Russell Terrier	Breed_Dogs	English Terriers	NA
PASP000001	Pont-Audemer spaniel	Breed_Dogs	Pointers	Pointing Spaniels
PASP000002	Pont-Audemer spaniel	Breed_Dogs	Pointers	Pointing Spaniels
PASP000003	Pont-Audemer spaniel	Breed_Dogs	Pointers	Pointing Spaniels
PASP000004	Pont-Audemer spaniel	Breed_Dogs	Pointers	Pointing Spaniels
PASP000005	Pont-Audemer spaniel	Breed_Dogs	Pointers	Pointing Spaniels
PASP000006	Pont-Audemer spaniel	Breed_Dogs	Pointers	Pointing Spaniels
PASP000007	Pont-Audemer spaniel	Breed_Dogs	Pointers	Pointing Spaniels
PATR000001	Patterdale Terrier	Breed_Dogs	English Terriers	NA
PATR000002	Patterdale Terrier	Breed_Dogs	English Terriers	NA
PATR000003	Patterdale Terrier	Breed_Dogs	English Terriers	NA
PATR000004	Patterdale Terrier	Breed_Dogs	English Terriers	NA
PBGA000001	Petit Bleu de Gascogne	Breed_Dogs	Scenthounds	French-English
PBGA000002	Petit Bleu de Gascogne	Breed_Dogs	Scenthounds	French-English
PBGA000003	Petit Bleu de Gascogne	Breed_Dogs	Scenthounds	French-English
PBGA000004	Petit Bleu de Gascogne	Breed_Dogs	Scenthounds	French-English
PBGR000001	Brussels Griffon (smooth)	Breed_Dogs	Spitz	Schnauzer Spitz
PBGR000002	Brussels Griffon (smooth)	Breed_Dogs	Spitz	Schnauzer Spitz
PBGV000001	Petit Basset Griffon Vendeen	Breed_Dogs	Scenthounds	French-English
PBGV000002	Petit Basset Griffon Vendeen	Breed_Dogs	Scenthounds	French-English
PBGV000003	Petit Basset Griffon Vendeen	Breed_Dogs	Scenthounds	French-English
PBGV000004	Petit Basset Griffon Vendeen	Breed_Dogs	Scenthounds	French-English
PBGV000005	Petit Basset Griffon Vendeen	Breed_Dogs	Scenthounds	French-English
PBGV000006	Petit Basset Griffon Vendeen	Breed_Dogs	Scenthounds	French-English
PBGV000007	Petit Basset Griffon Vendeen	Breed_Dogs	Scenthounds	French-English
PBGV000008	Petit Basset Griffon Vendeen	Breed_Dogs	Scenthounds	French-English
PBGV000009	Petit Basset Griffon Vendeen	Breed_Dogs	Scenthounds	French-English
PBGV000010	Petit Basset Griffon Vendeen	Breed_Dogs	Scenthounds	French-English
PBGV000011	Unknown	Breed_Dogs	n.d.	NA
PBGV000012	Petit Basset Griffon Vendeen	Breed_Dogs	Scenthounds	French-English
PEKE000001	Pekingese	Breed_Dogs	Asian	Asian Toy
PEKE000002	Pekingese	Breed_Dogs	Asian	Asian Toy
PEKE000003	Pekingese	Breed_Dogs	Asian	Asian Toy
PEMB000001	Pembroke Welsh Corgi	Breed_Dogs	UK Herding	NA
PERH000001	Peruvian Hairless	Breed_Dogs	Hairless	NA
PERH000002	Peruvian Hairless	Breed_Dogs	Hairless	NA
PERH000003	Peruvian Hairless	Breed_Dogs	Hairless	NA
PERH000004	Peruvian Hairless	Breed_Dogs	Hairless	NA
PERH000005	Peruvian Hairless	Breed_Dogs	Hairless	NA
PHAL000001	Continental Toy Spaniel (Phalene)	Breed_Dogs	None	NA
PHAL000002	Continental Toy Spaniel (Phalene)	Breed_Dogs	None	NA
PHAL000003	Continental Toy Spaniel (Phalene)	Breed_Dogs	None	NA
PHAL000004	Continental Toy Spaniel (Phalene)	Breed_Dogs	None	NA
PHAL000005	Continental Toy Spaniel (Phalene)	Breed_Dogs	None	NA
PHAR000001	Pharaoh Hound	Breed_Dogs	Flockguard Sighthound	Iberian
PHAR000002	Pharaoh Hound	Breed_Dogs	Flockguard Sighthound	Iberian
PHAR000003	Pharaoh Hound	Breed_Dogs	Flockguard Sighthound	Iberian
PHAR000004	Pharaoh Hound	Breed_Dogs	Flockguard Sighthound	Iberian
PHAR000005	Pharaoh Hound	Breed_Dogs	Flockguard Sighthound	Iberian
PHAR000006	Pharaoh Hound	Breed_Dogs	Flockguard Sighthound	Iberian
PISH000001	Picardy Shepherd	Breed_Dogs	Belgian Herders	NA
PISH000002	Picardy Shepherd	Breed_Dogs	Belgian Herders	NA
PISH000003	Picardy Shepherd	Breed_Dogs	Belgian Herders	NA
PISH000004	Picardy Shepherd	Breed_Dogs	Belgian Herders	NA
PISH000005	Picardy Shepherd	Breed_Dogs	Belgian Herders	NA
PISH000006	Picardy Shepherd	Breed_Dogs	Belgian Herders	NA
PISP000001	Picardy Spaniel	Breed_Dogs	Pointers	Setter
PISP000002	Picardy Spaniel	Breed_Dogs	Pointers	Setter
PISP000003	Picardy Spaniel	Breed_Dogs	Pointers	Setter
PISP000004	Picardy Spaniel	Breed_Dogs	Pointers	Setter
PITB000001	Pit Bull Terrier	Mixed/Other	n.d.	NA
PITB000002	Pit Bull Terrier	Mixed/Other	n.d.	NA
PLOT000001	Plott Hound	Breed_Dogs	Scenthounds	American
POLG000001	Polish Greyhound	Breed_Dogs	Flockguard Sighthound	United Kingdom
POLG000002	Polish Greyhound	Breed_Dogs	Flockguard Sighthound	United Kingdom
POLG000003	Polish Greyhound	Breed_Dogs	Flockguard Sighthound	United Kingdom
POLG000004	Polish Greyhound	Breed_Dogs	Flockguard Sighthound	United Kingdom
POLG000005	Polish Greyhound	Breed_Dogs	Flockguard Sighthound	United Kingdom
POLG000006	Polish Greyhound	Breed_Dogs	Flockguard Sighthound	United Kingdom
POLG000007	Polish Greyhound	Breed_Dogs	Flockguard Sighthound	United Kingdom
POLS000001	Polish Lowland Sheepdog	Breed_Dogs	None	NA
POLS000002	Polish Lowland Sheepdog	Breed_Dogs	None	NA
POLS000003	Polish Tatra Sheepdog	Breed_Dogs	Hungary	Flockguard
POLS000004	Polish Tatra Sheepdog	Breed_Dogs	Hungary	Flockguard
POMR000001	Pomeranian	Breed_Dogs	Spitz	German Spitz
POMR000002	Pomeranian	Breed_Dogs	Spitz	German Spitz
POMR000003	Pomeranian	Breed_Dogs	Spitz	German Spitz
POMR000004	Pomeranian	Breed_Dogs	Spitz	German Spitz
POMR000005	Pomeranian	Breed_Dogs	Spitz	German Spitz
POMR000006	Pomeranian	Breed_Dogs	Spitz	German Spitz
POMR000007	Pomeranian	Breed_Dogs	Spitz	German Spitz
POMR000008	Pomeranian	Breed_Dogs	Spitz	German Spitz
POOD000001	Poodle	Breed_Dogs	Asian	Bichons
POPT000001	Portuguese Pointer	Breed_Dogs	Pointers	Short-haired
PORC000001	Porcelaine	Breed_Dogs	Scenthounds	Swiss
POSD000001	Portuguese Sheepdog	Breed_Dogs	Continental Herders	NA
POSD000002	Portuguese Sheepdog	Breed_Dogs	Continental Herders	NA
POSD000003	Portuguese Sheepdog	Breed_Dogs	Continental Herders	NA
POSD000004	Portuguese Sheepdog	Breed_Dogs	Continental Herders	NA
POSD000005	Portuguese Sheepdog	Breed_Dogs	Continental Herders	NA
POSD000006	Portuguese Sheepdog	Breed_Dogs	Continental Herders	NA
POSH000001	Posavac Hound	Breed_Dogs	Scenthounds	Mediterranean
PPOD000001	Portuguese Podengo	Breed_Dogs	Flockguard Sighthound	Iberian
PPOD000002	Portuguese Podengo	Breed_Dogs	Flockguard Sighthound	Iberian
PPOD000003	Portuguese Podengo Pequeno	Breed_Dogs	None	NA
PPOD000004	Portuguese Podengo Pequeno	Breed_Dogs	None	NA
PPOP000001	Portuguese Podengo Pequeno	Breed_Dogs	None	NA
PPOP000002	Portuguese Podengo Pequeno	Breed_Dogs	None	NA
PRKR000001	Prague Ratter	Breed_Dogs	Pinscher	NA
PRKR000002	Prague Ratter	Breed_Dogs	Pinscher	NA
PRKR000003	Prague Ratter	Breed_Dogs	Pinscher	NA
PRKR000004	Prague Ratter	Breed_Dogs	Pinscher	NA
PRKR000005	Prague Ratter	Breed_Dogs	Pinscher	NA
PTAS000001	Polish Tatra Sheepdog	Breed_Dogs	Hungary	Flockguard
PTAS000002	Polish Tatra Sheepdog	Breed_Dogs	Hungary	Flockguard
PTAS000003	Polish Tatra Sheepdog	Breed_Dogs	Hungary	Flockguard
PTAS000004	Polish Tatra Sheepdog	Breed_Dogs	Hungary	Flockguard
PTAS000005	Polish Tatra Sheepdog	Breed_Dogs	Hungary	Flockguard
PTAS000006	Polish Tatra Sheepdog	Breed_Dogs	Hungary	Flockguard
PTWD000001	Portuguese Water Dog	Breed_Dogs	Water Dogs	NA
PTWD000002	Portuguese Water Dog	Breed_Dogs	Water Dogs	NA
PTWD000003	Portuguese Water Dog	Breed_Dogs	Water Dogs	NA
PTWD000004	Portuguese Water Dog	Breed_Dogs	Water Dogs	NA
PTWD000005	Portuguese Water Dog	Breed_Dogs	Water Dogs	NA
PTWD000006	Portuguese Water Dog	Breed_Dogs	Water Dogs	NA
PTWD000007	Portuguese Water Dog	Breed_Dogs	Water Dogs	NA
PTWD000008	Portuguese Water Dog	Breed_Dogs	Water Dogs	NA
PUDL000001	Pudelpointer	Breed_Dogs	Pointers	Wire-haired
PUDL000002	Pudelpointer	Breed_Dogs	Pointers	Wire-haired
PUDL000003	Pudelpointer	Breed_Dogs	Pointers	Wire-haired
PUDL000004	Unknown	Breed_Dogs	n.d.	NA
PUGD000001	Pug	Breed_Dogs	Spitz	Schnauzer Spitz
PULI000001	Puli	Breed_Dogs	Hungary	Herder
PULI000002	Puli	Breed_Dogs	Hungary	Herder
PULI000003	Puli	Breed_Dogs	Hungary	Herder
PULI000004	Puli	Breed_Dogs	Hungary	Herder
PULI000005	Puli	Breed_Dogs	Hungary	Herder
PULI000006	Puli	Breed_Dogs	Hungary	Herder
PUMI000001	Pumi	Breed_Dogs	Hungary	Herder
PUMI000002	Pumi	Breed_Dogs	Hungary	Herder
PUMI000003	Pumi	Breed_Dogs	Hungary	Herder
PUMI000004	Pumi	Breed_Dogs	Hungary	Herder
PUMI000005	Pumi	Breed_Dogs	Hungary	Herder
PUMI000006	Pumi	Breed_Dogs	Hungary	Herder
PYMF000001	Pyrenean Mastiff	Breed_Dogs	Flockguard Sighthound	Iberian
PYMF000002	Pyrenean Mastiff	Breed_Dogs	Flockguard Sighthound	Iberian
PYMF000003	Pyrenean Mastiff	Breed_Dogs	Flockguard Sighthound	Iberian
PYMF000004	Pyrenean Mastiff	Breed_Dogs	Flockguard Sighthound	Iberian
PYMF000005	Pyrenean Mastiff	Breed_Dogs	Flockguard Sighthound	Iberian
PYMF000006	Pyrenean Mastiff	Breed_Dogs	Flockguard Sighthound	Iberian
PYSH000001	Pyrenean Shepherd	Breed_Dogs	Continental Herders	NA
PYSH000002	Great Pyrenees	Breed_Dogs	Flockguard Sighthound	Iberian
PYSH000003	Pyrenean Shepherd	Breed_Dogs	Continental Herders	NA
PYSH000004	Pyrenean Shepherd	Breed_Dogs	Continental Herders	NA
PYSH000005	Pyrenean Shepherd	Breed_Dogs	Continental Herders	NA
PYSH000006	Pyrenean Shepherd	Breed_Dogs	Continental Herders	NA
PYSH000007	Pyrenean Shepherd	Breed_Dogs	Continental Herders	NA
PYSH000008	Pyrenean Shepherd	Breed_Dogs	Continental Herders	NA
PYSH000009	Pyrenean Shepherd	Breed_Dogs	Continental Herders	NA
PYSH000010	Pyrenean Shepherd	Breed_Dogs	Continental Herders	NA
PYSH000011	Pyrenean Shepherd	Breed_Dogs	Continental Herders	NA
PYSH000012	Pyrenean Shepherd	Breed_Dogs	Continental Herders	NA
RABA000002	Ratonero Bodeguero Andaluz	Breed_Dogs	None	NA
RATT000001	Rat Terrier	Breed_Dogs	American Terriers	NA
RATT000002	Rat Terrier	Breed_Dogs	American Terriers	NA
REDB000001	Redbone Coonhound	Breed_Dogs	Scenthounds	American
REDB000002	Redbone Coonhound	Breed_Dogs	Scenthounds	American
REDB000003	Redbone Coonhound	Breed_Dogs	Scenthounds	American
RHOD000001	Rhodesian Ridgeback	Breed_Dogs	None	NA
RHOD000002	Rhodesian Ridgeback	Breed_Dogs	None	NA
ROOS000001	Teddy Roosevelt Terrier	Breed_Dogs	American Terriers	NA
ROOS000002	Teddy Roosevelt Terrier	Breed_Dogs	American Terriers	NA
RTOY000001	Russian Toy	Breed_Dogs	Pinscher	NA
RTOY000002	Russian Toy	Breed_Dogs	Pinscher	NA
RUSH000001	Russian Hound	Breed_Dogs	Scenthounds	Scenthound
RUSH000002	Russian Hound	Breed_Dogs	Scenthounds	Scenthound
RUSH000003	Russian Hound	Breed_Dogs	Scenthounds	Scenthound
RUSH000004	Russian Hound	Breed_Dogs	Scenthounds	Scenthound
RUSH000005	Russian Hound	Breed_Dogs	Scenthounds	Scenthound
RUSH000006	Russian Hound	Breed_Dogs	Scenthounds	Scenthound
RUTY000001	Russian Toy	Breed_Dogs	Pinscher	NA
RUTY000002	Russian Toy	Breed_Dogs	Pinscher	NA
RUTY000003	Russian Toy	Breed_Dogs	Pinscher	NA
RUTY000004	Russian Toy	Breed_Dogs	Pinscher	NA
RWSE000001	Irish Red and White Setter	Breed_Dogs	Pointers	Setter
SAAR000001	Saarloos Wolfdog	Breed_Dogs	German Shepherds	NA
SAAR000002	Saarloos Wolfdog	Breed_Dogs	German Shepherds	NA
SAAR000003	Saarloos Wolfdog	Breed_Dogs	German Shepherds	NA
SAAR000004	Saarloos Wolfdog	Breed_Dogs	German Shepherds	NA
SALU000001	Saluki	Breed_Dogs	Flockguard Sighthound	Central Asia
SALU000002	Saluki	Breed_Dogs	Flockguard Sighthound	Central Asia
SALU000003	Saluki	Breed_Dogs	Flockguard Sighthound	Central Asia
SAMO000001	Samoyed	Breed_Dogs	Asian	Asian Spitz
SAMO000002	Samoyed	Breed_Dogs	Asian	Asian Spitz
SAMO000003	Samoyed	Breed_Dogs	Asian	Asian Spitz
SAMO000004	Samoyed	Breed_Dogs	Asian	Asian Spitz
SARP000001	Sarplaninac	Breed_Dogs	Flockguard Sighthound	Central Asia
SARP000002	Sarplaninac	Breed_Dogs	Flockguard Sighthound	Central Asia
SARP000003	Sarplaninac	Breed_Dogs	Flockguard Sighthound	Central Asia
SARP000004	Sarplaninac	Breed_Dogs	Flockguard Sighthound	Central Asia
SCPD000001	Schapendoes	Breed_Dogs	Dutch	NA
SCPD000002	Schapendoes	Breed_Dogs	Dutch	NA
SCPD000003	Schapendoes	Breed_Dogs	Dutch	NA
SCPD000004	Schapendoes	Breed_Dogs	Dutch	NA
SEAL000001	Sealyham Terrier	Breed_Dogs	English Terriers	NA
SEAL000002	Sealyham Terrier	Breed_Dogs	English Terriers	NA
SEAL000003	Sealyham Terrier	Breed_Dogs	English Terriers	NA
SEAL000004	Sealyham Terrier	Breed_Dogs	English Terriers	NA
SEAL000005	Sealyham Terrier	Breed_Dogs	English Terriers	NA
SEAL000006	Sealyham Terrier	Breed_Dogs	English Terriers	NA
SEAL000007	Sealyham Terrier	Breed_Dogs	English Terriers	NA
SEAL000008	Sealyham Terrier	Breed_Dogs	English Terriers	NA
SEAL000009	Sealyham Terrier	Breed_Dogs	English Terriers	NA
SEAL000010	Sealyham Terrier	Breed_Dogs	English Terriers	NA
SGGO000001	Segugio Italiano	Breed_Dogs	Scenthounds	Mediterranean
SGGO000002	Segugio Italiano	Breed_Dogs	Scenthounds	Mediterranean
SGGO000003	Segugio Italiano	Breed_Dogs	Scenthounds	Mediterranean
SGGO000004	Segugio Italiano	Breed_Dogs	Scenthounds	Mediterranean
SHAR000001	Chinese Shar-Pei	Breed_Dogs	Asian	Asian Spitz
SHAR000002	Chinese Shar-Pei	Breed_Dogs	Asian	Asian Spitz
SHAR000003	Chinese Shar-Pei	Breed_Dogs	Asian	Asian Spitz
SHIB000001	Shiba Inu	Breed_Dogs	Asian	Asian Spitz
SHIB000002	Shiba Inu	Breed_Dogs	Asian	Asian Spitz
SHIB000003	Shiba Inu	Breed_Dogs	Asian	Asian Spitz
SHIH000001	Shih Tzu	Breed_Dogs	Asian	Asian Toy
SHIH000002	Shih Tzu	Breed_Dogs	Asian	Asian Toy
SHIH000003	Shih Tzu	Breed_Dogs	Asian	Asian Toy
SHIH000004	Shih Tzu	Breed_Dogs	Asian	Asian Toy
SHIH000005	Shih Tzu	Breed_Dogs	Asian	Asian Toy
SHIL000001	Shiloh Shepherd	Breed_Dogs	German Shepherds	NA
SIKU000001	Shikoku	Breed_Dogs	Asian	Asian Spitz
SILK000001	Silky Terrier	Breed_Dogs	Australian Terriers	NA
SILK000002	Silky Terrier	Breed_Dogs	Australian Terriers	NA
SILK000003	Silky Terrier	Breed_Dogs	Australian Terriers	NA
SILK000004	Skye Terrier	Breed_Dogs	Scottish Terriers	NA
SILK000005	Skye Terrier	Breed_Dogs	Scottish Terriers	NA
SKIP000001	Schipperke	Breed_Dogs	Spitz	Schnauzer Spitz
SKIP000002	Rhodesian Ridgeback	Breed_Dogs	None	NA
SKIP000003	Schipperke	Breed_Dogs	Spitz	Schnauzer Spitz
SKIP000004	Schipperke	Breed_Dogs	Spitz	Schnauzer Spitz
SKIP000005	Schipperke	Breed_Dogs	Spitz	Schnauzer Spitz
SKIP000006	Schipperke	Breed_Dogs	Spitz	Schnauzer Spitz
SKWH000001	Silken Windhound	Breed_Dogs	Flockguard Sighthound	United Kingdom
SKWH000002	Silken Windhound	Breed_Dogs	Flockguard Sighthound	United Kingdom
SKYE000003	Skye Terrier	Breed_Dogs	Scottish Terriers	NA
SLAP000001	Swedish Lapphund	Breed_Dogs	Spitz	Nordic Spitz
SLAP000002	Swedish Lapphund	Breed_Dogs	Spitz	Nordic Spitz
SLAP000003	Swedish Lapphund	Breed_Dogs	Spitz	Nordic Spitz
SLCU000001	Slovak Cuvac	Breed_Dogs	Hungary	Flockguard
SLCU000002	Slovak Cuvac	Breed_Dogs	Hungary	Flockguard
SLCU000003	Slovak Cuvac	Breed_Dogs	Hungary	Flockguard
SLCU000004	Slovak Cuvac	Breed_Dogs	Hungary	Flockguard
SLCU000005	Slovak Cuvac	Breed_Dogs	Hungary	Flockguard
SLCU000006	Slovak Cuvac	Breed_Dogs	Hungary	Flockguard
SLCU000007	Slovak Cuvac	Breed_Dogs	Hungary	Flockguard
SLKV000001	Slovensky Kopov	Breed_Dogs	Scenthounds	Dachshund-like
SLKV000002	Slovensky Kopov	Breed_Dogs	Scenthounds	Dachshund-like
SLOU000001	Sloughi	Breed_Dogs	Flockguard Sighthound	Central Asia
SLOU000002	Sloughi	Breed_Dogs	Flockguard Sighthound	Central Asia
SLOU000003	Sloughi	Breed_Dogs	Flockguard Sighthound	Central Asia
SLWP000001	Slovakian Wirehaired Pointer	Breed_Dogs	Pointers	Wire-haired
SLWP000002	Slovakian Wirehaired Pointer	Breed_Dogs	Pointers	Wire-haired
SLWP000003	Slovakian Wirehaired Pointer	Breed_Dogs	Pointers	Wire-haired
SLWP000004	Slovakian Wirehaired Pointer	Breed_Dogs	Pointers	Wire-haired
SMCD000001	Saint Miguel Cattle Dog	Breed_Dogs	None	NA
SMCD000002	Saint Miguel Cattle Dog	Breed_Dogs	None	NA
SMFX000001	Smooth Fox Terrier	Breed_Dogs	English Terriers	NA
SMFX000002	Smooth Fox Terrier	Breed_Dogs	English Terriers	NA
SMFX000003	Smooth Fox Terrier	Breed_Dogs	English Terriers	NA
SMFX000004	Smooth Fox Terrier	Breed_Dogs	English Terriers	NA
SMFX000005	Smooth Fox Terrier	Breed_Dogs	English Terriers	NA
SMFX000006	Smooth Fox Terrier	Breed_Dogs	English Terriers	NA
SMSH000001	Small Swiss Hound	Breed_Dogs	Scenthounds	Swiss
SMSH000002	Small Swiss Hound	Breed_Dogs	Scenthounds	Swiss
SMSH000003	Small Swiss Hound	Breed_Dogs	Scenthounds	Swiss
SMSH000004	Small Swiss Hound	Breed_Dogs	Scenthounds	Swiss
SMSH000005	Small Swiss Hound	Breed_Dogs	Scenthounds	Swiss
SMSH000006	Small Swiss Hound	Breed_Dogs	Scenthounds	Swiss
SMSH000007	Small Swiss Hound	Breed_Dogs	Scenthounds	Swiss
SMSH000008	Small Swiss Hound	Breed_Dogs	Scenthounds	Swiss
SMSH000009	Small Swiss Hound	Breed_Dogs	Scenthounds	Swiss
SMSH000010	Small Swiss Hound	Breed_Dogs	Scenthounds	Swiss
SMSH000011	Small Swiss Hound	Breed_Dogs	Scenthounds	Swiss
SMSH000012	Small Swiss Hound	Breed_Dogs	Scenthounds	Swiss
SPEI000001	Chinese Shar-Pei	Breed_Dogs	Asian	Asian Spitz
SPEI000002	Chinese Shar-Pei	Breed_Dogs	Asian	Asian Spitz
SPEI000003	Chinese Shar-Pei	Breed_Dogs	Asian	Asian Spitz
SPEI000004	Chinese Shar-Pei	Breed_Dogs	Asian	Asian Spitz
SPEI000005	Chinese Shar-Pei	Breed_Dogs	Asian	Asian Spitz
SPEI000006	Chinese Shar-Pei	Breed_Dogs	Asian	Asian Spitz
SPIN000001	Spinone Italiano	Breed_Dogs	Pointers	Wire-haired
SPIN000002	Spinone Italiano	Breed_Dogs	Pointers	Wire-haired
SPIN000003	Spinone Italiano	Breed_Dogs	Pointers	Wire-haired
SPIN000004	Spinone Italiano	Breed_Dogs	Pointers	Wire-haired
SPIN000005	Spinone Italiano	Breed_Dogs	Pointers	Wire-haired
SPIN000006	Spinone Italiano	Breed_Dogs	Pointers	Wire-haired
SPIN000007	Spinone Italiano	Breed_Dogs	Pointers	Wire-haired
SPIN000008	Spinone Italiano	Breed_Dogs	Pointers	Wire-haired
SPMT000001	Spanish Mastiff	Breed_Dogs	Flockguard Sighthound	Iberian
SPMT000002	Spanish Mastiff	Breed_Dogs	Flockguard Sighthound	Iberian
SPMT000003	Spanish Mastiff	Breed_Dogs	Flockguard Sighthound	Iberian
SPMT000004	Spanish Mastiff	Breed_Dogs	Flockguard Sighthound	Iberian
SPMT000005	Spanish Mastiff	Breed_Dogs	Flockguard Sighthound	Iberian
SPMT000006	Spanish Mastiff	Breed_Dogs	Flockguard Sighthound	Iberian
SPWD000001	Spanish Water Dog	Breed_Dogs	Water Dogs	NA
SPWD000002	Spanish Water Dog	Breed_Dogs	Water Dogs	NA
SPWD000003	Spanish Water Dog	Breed_Dogs	Water Dogs	NA
SPWD000004	Spanish Water Dog	Breed_Dogs	Water Dogs	NA
SRAB000001	Sarabi	Breed_Dogs	Flockguard Sighthound	Central Asia
SRAB000002	Sarabi	Breed_Dogs	Flockguard Sighthound	Central Asia
SROV000001	South Russian Ovcharka	Breed_Dogs	Flockguard Sighthound	Central Asia
SROV000002	Unknown	Breed_Dogs	n.d.	NA
SROV000003	South Russian Ovcharka	Breed_Dogs	Flockguard Sighthound	Central Asia
SROV000004	South Russian Ovcharka	Breed_Dogs	Flockguard Sighthound	Central Asia
SSHP000001	Shetland Sheepdog	Breed_Dogs	UK Herding	NA
SSHP000002	Shetland Sheepdog	Breed_Dogs	UK Herding	NA
SSHP000003	Shetland Sheepdog	Breed_Dogs	UK Herding	NA
SSHP000004	Shetland Sheepdog	Breed_Dogs	UK Herding	NA
SSNZ000001	Standard Schnauzer	Breed_Dogs	Spitz	Schnauzer Spitz
STAF000001	Staffordshire Bull Terrier	Breed_Dogs	Mastiffs	Bull Terriers
STAF000002	Staffordshire Bull Terrier	Breed_Dogs	Mastiffs	Bull Terriers
STAF000003	Staffordshire Bull Terrier	Breed_Dogs	Mastiffs	Bull Terriers
STAF000004	Staffordshire Bull Terrier	Breed_Dogs	Mastiffs	Bull Terriers
STAF000005	Staffordshire Bull Terrier	Breed_Dogs	Mastiffs	Bull Terriers
STAF000006	Staffordshire Bull Terrier	Breed_Dogs	Mastiffs	Bull Terriers
STBD000001	Saint Bernard	Breed_Dogs	Alpine	NA
STBD000002	Saint Bernard	Breed_Dogs	Alpine	NA
STBD000003	Saint Bernard	Breed_Dogs	Alpine	NA
STBD000004	Saint Bernard	Breed_Dogs	Alpine	NA
STBD000005	Saint Bernard	Breed_Dogs	Alpine	NA
STBD000006	Saint Bernard	Breed_Dogs	Alpine	NA
STBD000007	Saint Bernard	Breed_Dogs	Alpine	NA
STBD000008	Saint Bernard	Breed_Dogs	Alpine	NA
STBD000009	Saint Bernard	Breed_Dogs	Alpine	NA
STBD000010	Saint Bernard	Breed_Dogs	Alpine	NA
STBD000011	Saint Bernard	Breed_Dogs	Alpine	NA
STBD000012	Saint Bernard	Breed_Dogs	Alpine	NA
STBD000013	Saint Bernard	Breed_Dogs	Alpine	NA
STBY000001	Stabyhoun	Breed_Dogs	Dutch	NA
STBY000002	Stabyhoun	Breed_Dogs	Dutch	NA
STBY000003	Stabyhoun	Breed_Dogs	Dutch	NA
STBY000004	Stabyhoun	Breed_Dogs	Dutch	NA
SUSP000001	Saint-Usuge Spaniel	Breed_Dogs	Pointers	Pointing Spaniels
SUSX000001	Sussex Spaniel	Breed_Dogs	Spaniels	Flushing
SUSX000002	Sussex Spaniel	Breed_Dogs	Spaniels	Flushing
SUSX000003	Sussex Spaniel	Breed_Dogs	Spaniels	Flushing
SUSX000004	Sussex Spaniel	Breed_Dogs	Spaniels	Flushing
SUSX000005	Sussex Spaniel	Breed_Dogs	Spaniels	Flushing
SUSX000006	Sussex Spaniel	Breed_Dogs	Spaniels	Flushing
SVAL000007	Swedish Vallhund	Breed_Dogs	Spitz	Nordic Spitz
SVAL000008	Swedish Vallhund	Breed_Dogs	Spitz	Nordic Spitz
SVAL000009	Swedish Vallhund	Breed_Dogs	Spitz	Nordic Spitz
SVAL000010	Swedish Vallhund	Breed_Dogs	Spitz	Nordic Spitz
SWEH000001	Swedish Elkhound	Breed_Dogs	Spitz	Nordic Spitz
SWEH000002	Swedish Elkhound	Breed_Dogs	Spitz	Nordic Spitz
SWEH000003	Swedish Elkhound	Breed_Dogs	Spitz	Nordic Spitz
SWEH000004	Swedish Elkhound	Breed_Dogs	Spitz	Nordic Spitz
SWHN000001	Swiss Hound	Breed_Dogs	Scenthounds	Swiss
SWHN000002	Swiss Hound	Breed_Dogs	Scenthounds	Swiss
SWHN000003	Swiss Hound	Breed_Dogs	Scenthounds	Swiss
SWHN000004	Swiss Hound	Breed_Dogs	Scenthounds	Swiss
SWHN000005	Swiss Hound	Breed_Dogs	Scenthounds	Swiss
SWHN000006	Swiss Hound	Breed_Dogs	Scenthounds	Swiss
SWHN000007	Swiss Hound	Breed_Dogs	Scenthounds	Swiss
SWHN000008	Swiss Hound	Breed_Dogs	Scenthounds	Swiss
SWHN000009	Swiss Hound	Breed_Dogs	Scenthounds	Swiss
SWHN000010	Swiss Hound	Breed_Dogs	Scenthounds	Swiss
SWHN000011	Swiss Hound	Breed_Dogs	Scenthounds	Swiss
SWHN000012	Swiss Hound	Breed_Dogs	Scenthounds	Swiss
SWWE000001	Swedish White Elkhound	Breed_Dogs	Spitz	Nordic Spitz
SWWE000002	Swedish White Elkhound	Breed_Dogs	Spitz	Nordic Spitz
SWWE000003	Swedish White Elkhound	Breed_Dogs	Spitz	Nordic Spitz
SWWE000004	Swedish White Elkhound	Breed_Dogs	Spitz	Nordic Spitz
SWWE000005	Swedish White Elkhound	Breed_Dogs	Spitz	Nordic Spitz
SWWE000006	Swedish White Elkhound	Breed_Dogs	Spitz	Nordic Spitz
SWWE000007	Swedish White Elkhound	Breed_Dogs	Spitz	Nordic Spitz
SWWE000008	Swedish White Elkhound	Breed_Dogs	Spitz	Nordic Spitz
TAZI000001	Tazi	Breed_Dogs	Flockguard Sighthound	Central Asia
TAZI000002	Tazi	Breed_Dogs	Flockguard Sighthound	Central Asia
TAZI000003	Tazi	Breed_Dogs	Flockguard Sighthound	Central Asia
TERV000001	Cardigan Welsh Corgi	Breed_Dogs	UK Herding	NA
TERV000002	Belgian Tervuren	Breed_Dogs	Belgian Herders	NA
TERV000003	Belgian Tervuren	Breed_Dogs	Belgian Herders	NA
TERV000004	Belgian Tervuren	Breed_Dogs	Belgian Herders	NA
TERV000005	Belgian Tervuren	Breed_Dogs	Belgian Herders	NA
TERV000006	Belgian Tervuren	Breed_Dogs	Belgian Herders	NA
THAI000001	Thai Ridgeback	Breed_Dogs	Asian	Asian Spitz
THAI000002	Thai Ridgeback	Breed_Dogs	Asian	Asian Spitz
THAI000003	Thai Ridgeback	Breed_Dogs	Asian	Asian Spitz
THAI000004	Thai Ridgeback	Breed_Dogs	Asian	Asian Spitz
THAI000005	Thai Ridgeback	Breed_Dogs	Asian	Asian Spitz
THAI000006	Thai Ridgeback	Breed_Dogs	Asian	Asian Spitz
THAI000007	Thai Ridgeback	Breed_Dogs	Asian	Asian Spitz
THAI000008	Thai Ridgeback	Breed_Dogs	Asian	Asian Spitz
THAI000009	Thai Ridgeback	Breed_Dogs	Asian	Asian Spitz
TIBS000001	Tibetan Spaniel	Breed_Dogs	Asian	Asian Toy
TIBS000002	Tibetan Spaniel	Breed_Dogs	Asian	Asian Toy
TIBS000003	Tibetan Spaniel	Breed_Dogs	Asian	Asian Toy
TIBS000004	Tibetan Spaniel	Breed_Dogs	Asian	Asian Toy
TIBS000005	Tibetan Spaniel	Breed_Dogs	Asian	Asian Toy
TIBS000006	Tibetan Spaniel	Breed_Dogs	Asian	Asian Toy
TIBS000007	Tibetan Spaniel	Breed_Dogs	Asian	Asian Toy
TIBT000001	Tibetan Terrier	Breed_Dogs	Asian	NA
TIBT000002	Tibetan Terrier	Breed_Dogs	Asian	NA
TIBT000003	Tibetan Terrier	Breed_Dogs	Asian	NA
TMSK000001	Tamaskan	Breed_Dogs	German Shepherds	NA
TOSA000001	Tosa Inu	Breed_Dogs	Mastiffs	NA
TOSA000002	Tosa Inu	Breed_Dogs	Mastiffs	NA
TOSA000003	Tosa Inu	Breed_Dogs	Mastiffs	NA
TPOO000001	Toy Poodle	Breed_Dogs	Asian	Bichons
TPOO000002	Toy Poodle	Breed_Dogs	Asian	Bichons
TURM000001	Turkish Mastiff	Breed_Dogs	Flockguard Sighthound	Central Asia
TURM000002	Turkish Mastiff	Breed_Dogs	Flockguard Sighthound	Central Asia
TURM000003	Turkish Mastiff	Breed_Dogs	Flockguard Sighthound	Central Asia
TURM000004	Turkish Mastiff	Breed_Dogs	Flockguard Sighthound	Central Asia
TURM000005	Turkish Mastiff	Breed_Dogs	Flockguard Sighthound	Central Asia
TWCH000001	Unknown	Breed_Dogs	n.d.	NA
TWCH000002	Treeing Walker Coonhound	Breed_Dogs	Scenthounds	American
TYFX000001	Toy Fox Terrier	Breed_Dogs	American Terriers	NA
TYFX000002	Toy Fox Terrier	Breed_Dogs	American Terriers	NA
TYFX000003	Toy Fox Terrier	Breed_Dogs	American Terriers	NA
TYFX000004	Toy Fox Terrier	Breed_Dogs	American Terriers	NA
TYFX000005	Toy Fox Terrier	Breed_Dogs	American Terriers	NA
TYFX000006	Toy Fox Terrier	Breed_Dogs	American Terriers	NA
TYFX000007	Toy Fox Terrier	Breed_Dogs	American Terriers	NA
TYFX000008	Toy Fox Terrier	Breed_Dogs	American Terriers	NA
TYFX000009	Toy Fox Terrier	Breed_Dogs	American Terriers	NA
TYFX000010	Toy Fox Terrier	Breed_Dogs	American Terriers	NA
VILLAF000001	Afghanistan	Village_Dogs	n.d.	NA
VILLAF000002	Afghanistan	Village_Dogs	n.d.	NA
VILLAF000003	Afghanistan	Village_Dogs	n.d.	NA
VILLAK000001	Alaska	Village_Dogs	n.d.	NA
VILLAK000002	Alaska	Village_Dogs	n.d.	NA
VILLAK000003	Alaska	Village_Dogs	n.d.	NA
VILLAZ000001	Azerbaijan	Village_Dogs	n.d.	NA
VILLAZ000002	Azerbaijan	Village_Dogs	n.d.	NA
VILLAZ000003	Azerbaijan	Village_Dogs	n.d.	NA
VILLAZ000004	Azerbaijan	Village_Dogs	n.d.	NA
VILLAZ000005	Azerbaijan	Village_Dogs	n.d.	NA
VILLAZ000006	Azerbaijan	Village_Dogs	n.d.	NA
VILLAZ000007	Azerbaijan	Village_Dogs	n.d.	NA
VILLBG000001	Bulgaria	Village_Dogs	n.d.	NA
VILLBG000002	Bulgaria	Village_Dogs	n.d.	NA
VILLBG000003	Bulgaria	Village_Dogs	n.d.	NA
VILLBZ000001	Belize	Village_Dogs	n.d.	NA
VILLBZ000002	Belize	Village_Dogs	n.d.	NA
VILLBZ000003	Belize	Village_Dogs	n.d.	NA
VILLCG000001	Congo	Village_Dogs	n.d.	NA
VILLCG000002	Congo	Village_Dogs	n.d.	NA
VILLCG000003	Congo	Village_Dogs	n.d.	NA
VILLCG000004	Congo	Village_Dogs	n.d.	NA
VILLCG000005	Congo	Village_Dogs	n.d.	NA
VILLCG000006	Congo	Village_Dogs	n.d.	NA
VILLCG000007	Congo	Village_Dogs	n.d.	NA
VILLCG000008	Congo	Village_Dogs	n.d.	NA
VILLCG000009	Congo	Village_Dogs	n.d.	NA
VILLCG000010	Congo	Village_Dogs	n.d.	NA
VILLCG000011	Congo	Village_Dogs	n.d.	NA
VILLCG000012	Congo	Village_Dogs	n.d.	NA
VILLCG000013	Congo	Village_Dogs	n.d.	NA
VILLCG000014	Congo	Village_Dogs	n.d.	NA
VILLCG000015	Congo	Village_Dogs	n.d.	NA
VILLCG000016	Congo	Village_Dogs	n.d.	NA
VILLCN000001	China	Village_Dogs	n.d.	NA
VILLCN000002	China	Village_Dogs	n.d.	NA
VILLCN000003	China	Village_Dogs	n.d.	NA
VILLCN000004	China	Village_Dogs	n.d.	NA
VILLCN000005	China	Village_Dogs	n.d.	NA
VILLCN000006	China	Village_Dogs	n.d.	NA
VILLCN000007	China	Village_Dogs	n.d.	NA
VILLCN000008	China	Village_Dogs	n.d.	NA
VILLCN000009	China	Village_Dogs	n.d.	NA
VILLCN000010	China	Village_Dogs	n.d.	NA
VILLCN000011	China	Village_Dogs	n.d.	NA
VILLCN000012	China	Village_Dogs	n.d.	NA
VILLCN000013	China	Village_Dogs	n.d.	NA
VILLCN000014	China	Village_Dogs	n.d.	NA
VILLCN000015	China	Village_Dogs	n.d.	NA
VILLCN000016	China	Village_Dogs	n.d.	NA
VILLCN000017	China	Village_Dogs	n.d.	NA
VILLCN000018	China	Village_Dogs	n.d.	NA
VILLCN000019	China	Village_Dogs	n.d.	NA
VILLCN000020	China	Village_Dogs	n.d.	NA
VILLCN000021	China	Village_Dogs	n.d.	NA
VILLCN000022	China	Village_Dogs	n.d.	NA
VILLCN000023	China	Village_Dogs	n.d.	NA
VILLCN000024	China	Village_Dogs	n.d.	NA
VILLCN000025	China	Village_Dogs	n.d.	NA
VILLCN000026	China	Village_Dogs	n.d.	NA
VILLCN000027	China	Village_Dogs	n.d.	NA
VILLCN000028	China	Village_Dogs	n.d.	NA
VILLCN000029	China	Village_Dogs	n.d.	NA
VILLCN000030	China	Village_Dogs	n.d.	NA
VILLCN000031	China	Village_Dogs	n.d.	NA
VILLCN000032	China	Village_Dogs	n.d.	NA
VILLCN000033	China	Village_Dogs	n.d.	NA
VILLCN000034	China	Village_Dogs	n.d.	NA
VILLCN000035	China	Village_Dogs	n.d.	NA
VILLCN000036	China	Village_Dogs	n.d.	NA
VILLCN000037	China	Village_Dogs	n.d.	NA
VILLCN000038	China	Village_Dogs	n.d.	NA
VILLCN000039	China	Village_Dogs	n.d.	NA
VILLCN000040	China	Village_Dogs	n.d.	NA
VILLCN000041	China	Village_Dogs	n.d.	NA
VILLCN000042	China	Village_Dogs	n.d.	NA
VILLCN000043	China	Village_Dogs	n.d.	NA
VILLCN000044	China	Village_Dogs	n.d.	NA
VILLCN000045	China	Village_Dogs	n.d.	NA
VILLCN000046	China	Village_Dogs	n.d.	NA
VILLCN000047	China	Village_Dogs	n.d.	NA
VILLCN000048	China	Village_Dogs	n.d.	NA
VILLCN000049	China	Village_Dogs	n.d.	NA
VILLCN000050	China	Village_Dogs	n.d.	NA
VILLCN000051	China	Village_Dogs	n.d.	NA
VILLCN000052	China	Village_Dogs	n.d.	NA
VILLCN000053	China	Village_Dogs	n.d.	NA
VILLCN000054	China	Village_Dogs	n.d.	NA
VILLCN000055	China	Village_Dogs	n.d.	NA
VILLCN000056	China	Village_Dogs	n.d.	NA
VILLCN000057	China	Village_Dogs	n.d.	NA
VILLCN000058	China	Village_Dogs	n.d.	NA
VILLCN000059	China	Village_Dogs	n.d.	NA
VILLCN000060	China	Village_Dogs	n.d.	NA
VILLCN000061	China	Village_Dogs	n.d.	NA
VILLCN000062	China	Village_Dogs	n.d.	NA
VILLCN000063	China	Village_Dogs	n.d.	NA
VILLCN000064	China	Village_Dogs	n.d.	NA
VILLCN000065	China	Village_Dogs	n.d.	NA
VILLCN000066	China	Village_Dogs	n.d.	NA
VILLCN000067	China	Village_Dogs	n.d.	NA
VILLCN000068	China	Village_Dogs	n.d.	NA
VILLCN000069	China	Village_Dogs	n.d.	NA
VILLCN000070	China	Village_Dogs	n.d.	NA
VILLCN000071	China	Village_Dogs	n.d.	NA
VILLCN000072	China	Village_Dogs	n.d.	NA
VILLCN000073	China	Village_Dogs	n.d.	NA
VILLCN000074	China	Village_Dogs	n.d.	NA
VILLCN000075	China	Village_Dogs	n.d.	NA
VILLCN000076	China	Village_Dogs	n.d.	NA
VILLCN000077	China	Village_Dogs	n.d.	NA
VILLCN000078	China	Village_Dogs	n.d.	NA
VILLCN000079	China	Village_Dogs	n.d.	NA
VILLCN000080	China	Village_Dogs	n.d.	NA
VILLCN000081	China	Village_Dogs	n.d.	NA
VILLCN000082	China	Village_Dogs	n.d.	NA
VILLCN000083	China	Village_Dogs	n.d.	NA
VILLCN000084	China	Village_Dogs	n.d.	NA
VILLCN000085	China	Village_Dogs	n.d.	NA
VILLCN000086	China	Village_Dogs	n.d.	NA
VILLCN000087	China	Village_Dogs	n.d.	NA
VILLCN000088	China	Village_Dogs	n.d.	NA
VILLCN000089	China	Village_Dogs	n.d.	NA
VILLCN000090	China	Village_Dogs	n.d.	NA
VILLCN000091	China	Village_Dogs	n.d.	NA
VILLCN000092	China	Village_Dogs	n.d.	NA
VILLCN000093	China	Village_Dogs	n.d.	NA
VILLCN000094	China	Village_Dogs	n.d.	NA
VILLCN000095	China	Village_Dogs	n.d.	NA
VILLCN000096	China	Village_Dogs	n.d.	NA
VILLCN000097	China	Village_Dogs	n.d.	NA
VILLCN000098	China	Village_Dogs	n.d.	NA
VILLCN000099	China	Village_Dogs	n.d.	NA
VILLCN000100	China	Village_Dogs	n.d.	NA
VILLCN000101	China	Village_Dogs	n.d.	NA
VILLCN000102	China	Village_Dogs	n.d.	NA
VILLCN000103	China	Village_Dogs	n.d.	NA
VILLCN000104	China	Village_Dogs	n.d.	NA
VILLCN000105	China	Village_Dogs	n.d.	NA
VILLCN000106	China	Village_Dogs	n.d.	NA
VILLCN000107	China	Village_Dogs	n.d.	NA
VILLCN000108	China	Village_Dogs	n.d.	NA
VILLCN000109	China	Village_Dogs	n.d.	NA
VILLCN000110	China	Village_Dogs	n.d.	NA
VILLCN000111	China	Village_Dogs	n.d.	NA
VILLCN000112	China	Village_Dogs	n.d.	NA
VILLCN000113	China	Village_Dogs	n.d.	NA
VILLCN000114	China	Village_Dogs	n.d.	NA
VILLCN000115	China	Village_Dogs	n.d.	NA
VILLCN000116	China	Village_Dogs	n.d.	NA
VILLCN000117	China	Village_Dogs	n.d.	NA
VILLCN000118	China	Village_Dogs	n.d.	NA
VILLCN000119	China	Village_Dogs	n.d.	NA
VILLCN000120	China	Village_Dogs	n.d.	NA
VILLCN000121	China	Village_Dogs	n.d.	NA
VILLCN000122	China	Village_Dogs	n.d.	NA
VILLCN000123	China	Village_Dogs	n.d.	NA
VILLCN000124	China	Village_Dogs	n.d.	NA
VILLCN000125	China	Village_Dogs	n.d.	NA
VILLCN000126	China	Village_Dogs	n.d.	NA
VILLCN000127	China	Village_Dogs	n.d.	NA
VILLCN000128	China	Village_Dogs	n.d.	NA
VILLCN000129	China	Village_Dogs	n.d.	NA
VILLCN000130	China	Village_Dogs	n.d.	NA
VILLCN000131	China	Village_Dogs	n.d.	NA
VILLCN000132	China	Village_Dogs	n.d.	NA
VILLCN000133	China	Village_Dogs	n.d.	NA
VILLCN000134	China	Village_Dogs	n.d.	NA
VILLCN000135	China	Village_Dogs	n.d.	NA
VILLCN000136	China	Village_Dogs	n.d.	NA
VILLCN000137	China	Village_Dogs	n.d.	NA
VILLCN000138	China	Village_Dogs	n.d.	NA
VILLCN000139	China	Village_Dogs	n.d.	NA
VILLCN000140	China	Village_Dogs	n.d.	NA
VILLCN000141	China	Village_Dogs	n.d.	NA
VILLCN000142	China	Village_Dogs	n.d.	NA
VILLCN000143	China	Village_Dogs	n.d.	NA
VILLCN000144	China	Village_Dogs	n.d.	NA
VILLCN000145	China	Village_Dogs	n.d.	NA
VILLCN000146	China	Village_Dogs	n.d.	NA
VILLCN000147	China	Village_Dogs	n.d.	NA
VILLCN000148	China	Village_Dogs	n.d.	NA
VILLCN000149	China	Village_Dogs	n.d.	NA
VILLCN000150	China	Village_Dogs	n.d.	NA
VILLCN000151	China	Village_Dogs	n.d.	NA
VILLCN000152	China	Village_Dogs	n.d.	NA
VILLCN000153	China	Village_Dogs	n.d.	NA
VILLCN000154	China	Village_Dogs	n.d.	NA
VILLCR000001	Costa Rica	Village_Dogs	n.d.	NA
VILLCR000002	Costa Rica	Village_Dogs	n.d.	NA
VILLCR000003	Costa Rica	Village_Dogs	n.d.	NA
VILLCU000001	Cuba	Village_Dogs	n.d.	NA
VILLFJ000001	Fiji	Village_Dogs	n.d.	NA
VILLFJ000002	Fiji	Village_Dogs	n.d.	NA
VILLFJ000003	Fiji	Village_Dogs	n.d.	NA
VILLFJ000004	Fiji	Village_Dogs	n.d.	NA
VILLFJ000005	Fiji	Village_Dogs	n.d.	NA
VILLFJ000006	Fiji	Village_Dogs	n.d.	NA
VILLFJ000007	Fiji	Village_Dogs	n.d.	NA
VILLFJ000008	Fiji	Village_Dogs	n.d.	NA
VILLFJ000009	Fiji	Village_Dogs	n.d.	NA
VILLGR000001	Greece	Village_Dogs	n.d.	NA
VILLGR000002	Greece	Village_Dogs	n.d.	NA
VILLGR000003	Greece	Village_Dogs	n.d.	NA
VILLIR000001	Iran	Village_Dogs	n.d.	NA
VILLIR000002	Iran	Village_Dogs	n.d.	NA
VILLIR000003	Iran	Village_Dogs	n.d.	NA
VILLIR000004	Iran	Village_Dogs	n.d.	NA
VILLIR000005	Iran	Village_Dogs	n.d.	NA
VILLIR000006	Iran	Village_Dogs	n.d.	NA
VILLIR000007	Iran	Village_Dogs	n.d.	NA
VILLIR000008	Iran	Village_Dogs	n.d.	NA
VILLIR000009	Iran	Village_Dogs	n.d.	NA
VILLIR000010	Iran	Village_Dogs	n.d.	NA
VILLIR000011	Iran	Village_Dogs	n.d.	NA
VILLIR000012	Iran	Village_Dogs	n.d.	NA
VILLIR000013	Iran	Village_Dogs	n.d.	NA
VILLIR000014	Iran	Village_Dogs	n.d.	NA
VILLIR000015	Iran	Village_Dogs	n.d.	NA
VILLIR000016	Iran	Village_Dogs	n.d.	NA
VILLIR000017	Iran	Village_Dogs	n.d.	NA
VILLIR000018	Iran	Village_Dogs	n.d.	NA
VILLIR000019	Iran	Village_Dogs	n.d.	NA
VILLIR000020	Iran	Village_Dogs	n.d.	NA
VILLIR000021	Iran	Village_Dogs	n.d.	NA
VILLIR000022	Iran	Village_Dogs	n.d.	NA
VILLIR000023	Iran	Village_Dogs	n.d.	NA
VILLIR000024	Iran	Village_Dogs	n.d.	NA
VILLIR000025	Iran	Village_Dogs	n.d.	NA
VILLIR000026	Iran	Village_Dogs	n.d.	NA
VILLIR000027	Iran	Village_Dogs	n.d.	NA
VILLIR000028	Iran	Village_Dogs	n.d.	NA
VILLIR000029	Iran	Village_Dogs	n.d.	NA
VILLIR000030	Iran	Village_Dogs	n.d.	NA
VILLKE000001	Kenya	Village_Dogs	n.d.	NA
VILLKE000002	Kenya	Village_Dogs	n.d.	NA
VILLKE000003	Kenya	Village_Dogs	n.d.	NA
VILLKE000004	Kenya	Village_Dogs	n.d.	NA
VILLKE000005	Kenya	Village_Dogs	n.d.	NA
VILLKE000006	Kenya	Village_Dogs	n.d.	NA
VILLKE000007	Kenya	Village_Dogs	n.d.	NA
VILLKE000008	Kenya	Village_Dogs	n.d.	NA
VILLKE000009	Kenya	Village_Dogs	n.d.	NA
VILLKE000010	Kenya	Village_Dogs	n.d.	NA
VILLKE000011	Kenya	Village_Dogs	n.d.	NA
VILLKE000012	Kenya	Village_Dogs	n.d.	NA
VILLKE000013	Kenya	Village_Dogs	n.d.	NA
VILLKE000014	Kenya	Village_Dogs	n.d.	NA
VILLKE000015	Kenya	Village_Dogs	n.d.	NA
VILLKE000016	Kenya	Village_Dogs	n.d.	NA
VILLKE000017	Kenya	Village_Dogs	n.d.	NA
VILLKE000018	Kenya	Village_Dogs	n.d.	NA
VILLKE000019	Kenya	Village_Dogs	n.d.	NA
VILLKH000001	Cambodia	Village_Dogs	n.d.	NA
VILLKH000002	Cambodia	Village_Dogs	n.d.	NA
VILLKH000003	Cambodia	Village_Dogs	n.d.	NA
VILLKH000004	Cambodia	Village_Dogs	n.d.	NA
VILLLK000001	Sri Lanka	Village_Dogs	n.d.	NA
VILLLR000001	Liberia	Village_Dogs	n.d.	NA
VILLLR000002	Liberia	Village_Dogs	n.d.	NA
VILLLR000003	Liberia	Village_Dogs	n.d.	NA
VILLLR000004	Liberia	Village_Dogs	n.d.	NA
VILLLR000005	Liberia	Village_Dogs	n.d.	NA
VILLLR000006	Liberia	Village_Dogs	n.d.	NA
VILLLR000007	Liberia	Village_Dogs	n.d.	NA
VILLLR000008	Liberia	Village_Dogs	n.d.	NA
VILLLR000009	Liberia	Village_Dogs	n.d.	NA
VILLLR000010	Liberia	Village_Dogs	n.d.	NA
VILLLR000011	Liberia	Village_Dogs	n.d.	NA
VILLLR000012	Liberia	Village_Dogs	n.d.	NA
VILLLR000013	Liberia	Village_Dogs	n.d.	NA
VILLLR000014	Liberia	Village_Dogs	n.d.	NA
VILLLR000015	Liberia	Village_Dogs	n.d.	NA
VILLLR000016	Liberia	Village_Dogs	n.d.	NA
VILLLR000017	Liberia	Village_Dogs	n.d.	NA
VILLMM000004	Myanmar	Village_Dogs	n.d.	NA
VILLMM000005	Myanmar	Village_Dogs	n.d.	NA
VILLMX000001	Mexico	Village_Dogs	n.d.	NA
VILLMX000002	Mexico	Village_Dogs	n.d.	NA
VILLMX000003	Mexico	Village_Dogs	n.d.	NA
VILLMX000004	Mexico	Village_Dogs	n.d.	NA
VILLNP000001	Nepal	Village_Dogs	n.d.	NA
VILLNP000002	Nepal	Village_Dogs	n.d.	NA
VILLNP000003	Nepal	Village_Dogs	n.d.	NA
VILLNP000004	Nepal	Village_Dogs	n.d.	NA
VILLNP000005	Nepal	Village_Dogs	n.d.	NA
VILLNP000006	Nepal	Village_Dogs	n.d.	NA
VILLNP000007	Nepal	Village_Dogs	n.d.	NA
VILLNP000008	Nepal	Village_Dogs	n.d.	NA
VILLPE000001	Peru	Village_Dogs	n.d.	NA
VILLPE000002	Peru	Village_Dogs	n.d.	NA
VILLPE000003	Peru	Village_Dogs	n.d.	NA
VILLPE000004	Peru	Village_Dogs	n.d.	NA
VILLPE000005	Peru	Village_Dogs	n.d.	NA
VILLPE000006	Peru	Village_Dogs	n.d.	NA
VILLPE000007	Peru	Village_Dogs	n.d.	NA
VILLPE000008	Peru	Village_Dogs	n.d.	NA
VILLPF000001	French Polynesia	Village_Dogs	n.d.	NA
VILLPF000002	French Polynesia	Village_Dogs	n.d.	NA
VILLPF000003	French Polynesia	Village_Dogs	n.d.	NA
VILLPF000004	French Polynesia	Village_Dogs	n.d.	NA
VILLPF000005	French Polynesia	Village_Dogs	n.d.	NA
VILLPF000006	French Polynesia	Village_Dogs	n.d.	NA
VILLPF000007	French Polynesia	Village_Dogs	n.d.	NA
VILLPF000008	French Polynesia	Village_Dogs	n.d.	NA
VILLPF000009	French Polynesia	Village_Dogs	n.d.	NA
VILLPF000010	French Polynesia	Village_Dogs	n.d.	NA
VILLPF000011	French Polynesia	Village_Dogs	n.d.	NA
VILLPF000012	French Polynesia	Village_Dogs	n.d.	NA
VILLPF000013	French Polynesia	Village_Dogs	n.d.	NA
VILLPH000001	Philippines	Village_Dogs	n.d.	NA
VILLPH000002	Philippines	Village_Dogs	n.d.	NA
VILLTC000001	Turks and Caicos Islands	Village_Dogs	n.d.	NA
VILLTH000001	Thailand	Village_Dogs	n.d.	NA
VILLTH000002	Thailand	Village_Dogs	n.d.	NA
VILLTH000003	Thailand	Village_Dogs	n.d.	NA
VILLTH000004	Thailand	Village_Dogs	n.d.	NA
VILLTH000005	Thailand	Village_Dogs	n.d.	NA
VILLTH000006	Thailand	Village_Dogs	n.d.	NA
VILLTH000007	Thailand	Village_Dogs	n.d.	NA
VILLTH000008	Thailand	Village_Dogs	n.d.	NA
VILLTH000009	Thailand	Village_Dogs	n.d.	NA
VILLTH000010	Thailand	Village_Dogs	n.d.	NA
VILLTJ000001	Tajikistan	Village_Dogs	n.d.	NA
VILLUZ000001	Uzbekistan	Village_Dogs	n.d.	NA
VILLUZ000002	Uzbekistan	Village_Dogs	n.d.	NA
VILLUZ000003	Uzbekistan	Village_Dogs	n.d.	NA
VILLUZ000004	Uzbekistan	Village_Dogs	n.d.	NA
[truncated: 78 more rows]

## Sheet: Table S5
Table S5. Runs of homozygosity (ROH) statistics per sample.
Group	FID	IID	NSEG	KB	KBAVG	FROH
SPANIELS	ACKR	ACKR000001	1624	969749	597.136	0.435148
SPANIELS	ACKR	ACKR000002	1549	923434	596.148	0.414365
SPANIELS	ACKR	ACKR000003	1473	901233	611.835	0.404403
SPITZ	AESK	AESK000001	1272	723923	569.122	0.32484
SPITZ	AESK	AESK000002	1030	462627	449.152	0.207591
SPITZ	AESK	AESK000003	1483	856032	577.23	0.384121
SPITZ	AESK	AESK000004	1416	847750	598.693	0.380404
SPITZ	AESK	AESK000005	852	345417	405.419	0.154996
SPITZ	AESK	AESK000006	1254	735706	586.688	0.330128
SPITZ	AFFN	AFFN000001	1675	949880	567.093	0.426232
SPITZ	AFFN	AFFN000003	1291	714441	553.401	0.320585
SPITZ	AFFN	AFFN000004	1388	741214	534.016	0.332599
SPITZ	AFFN	AFFN000005	1450	863811	595.732	0.387611
SPITZ	AFFN	AFFN000006	1370	721858	526.904	0.323914
FLOCKGUARD SIGHTHOUND	AFGH	AFGH000001	1203	696898	579.3	0.312714
SCENTHOUNDS	AFOX	AFOX000001	1449	861217	594.352	0.386447
SCENTHOUNDS	AFOX	AFOX000002	1053	470588	446.903	0.211163
SCENTHOUNDS	AFOX	AFOX000003	1195	551494	461.501	0.247468
SCENTHOUNDS	AFOX	AFOX000004	1174	547081	465.998	0.245487
SCENTHOUNDS	AFOX	AFOX000005	1077	489703	454.692	0.219741
SCENTHOUNDS	AFOX	AFOX000006	1252	614215	490.587	0.275612
SCENTHOUNDS	AFOX	AFOX000007	1185	590852	498.609	0.265128
RAT TERRIERS	AHRT	AHRT000001	1261	789656	626.214	0.354336
RAT TERRIERS	AHRT	AHRT000002	1509	962346	637.738	0.431826
RAT TERRIERS	AHRT	AHRT000003	1643	1.1196e+06	681.435	0.502388
RAT TERRIERS	AHRT	AHRT000004	1075	535978	498.584	0.240505
RAT TERRIERS	AHRT	AHRT000005	948	386801	408.018	0.173566
TERRIERS	AIRT	AIRT000001	1837	1.24938e+06	680.118	0.560623
FLOCKGUARD SIGHTHOUND	AKBH	AKBH000001	823	374779	455.382	0.168172
FLOCKGUARD SIGHTHOUND	AKBH	AKBH000002	675	235728	349.227	0.105776
FLOCKGUARD SIGHTHOUND	AKBH	AKBH000003	664	232552	350.228	0.104351
UNDEF	AKIN	AKIN000001	1501	932444	621.215	0.418408
UNDEF	AKIN	AKIN000002	1272	709011	557.398	0.318149
UNDEF	AKIT	AKIT000001	1038	513104	494.32	0.230241
UNDEF	AKIT	AKIT000002	1398	817464	584.738	0.366814
UNDEF	AKIT	AKIT000003	1386	782676	564.701	0.351204
UNDEF	AKIT	AKIT000004	1027	523190	509.435	0.234767
UNDEF	AKIT	AKIT000005	1230	696212	566.026	0.312406
UNDEF	AKIT	AKIT000006	1005	564859	562.048	0.253465
UNDEF	AKIT	AKIT000007	1065	576097	540.936	0.258507
UNDEF	AKIT	AKIT000008	1266	743568	587.336	0.333655
UNDEF	AKIT	AKIT000009	1166	684702	587.223	0.307241
SCENTHOUNDS	ALDB	ALDB000001	1283	724794	564.921	0.325231
SCENTHOUNDS	ALDB	ALDB000002	1237	669078	540.888	0.30023
SCENTHOUNDS	ALDB	ALDB000003	1342	740588	551.854	0.332318
SCENTHOUNDS	ALDB	ALDB000004	1399	728486	520.719	0.326888
SCENTHOUNDS	ALDB	ALDB000005	1164	583142	500.981	0.261669
SCENTHOUNDS	ALDB	ALDB000006	1377	705874	512.618	0.316741
SCENTHOUNDS	ALDB	ALDB000007	1378	740734	537.543	0.332384
ASIAN	AMAL	AMAL000001	1242	643540	518.148	0.288771
ASIAN	AMAL	AMAL000002	1296	693212	534.886	0.31106
ASIAN	AMAL	AMAL000003	1096	502321	458.322	0.225403
MASTIFFS	AMBD	AMBD000001	1402	771152	550.037	0.346033
MASTIFFS	AMBD	AMBD000002	1527	859861	563.105	0.385839
MASTIFFS	AMBD	AMBD000003	1490	816440	547.946	0.366355
MASTIFFS	AMBD	AMBD000005	1260	639727	507.72	0.28706
MASTIFFS	AMBD	AMBD000007	1180	512980	434.728	0.230185
MASTIFFS	AMST	AMST000001	1301	738678	567.777	0.331461
MASTIFFS	AMST	AMST000002	1251	617517	493.619	0.277094
MASTIFFS	AMST	AMST000003	1421	798453	561.895	0.358283
MASTIFFS	AMST	AMST000005	1303	633019	485.816	0.28405
MASTIFFS	AMST	AMST000006	1374	717702	522.345	0.322049
SPANIELS	AMWS	AMWS000001	1807	1.09093e+06	603.727	0.489526
SPANIELS	AMWS	AMWS000002	1353	769235	568.54	0.345173
SPANIELS	AMWS	AMWS000003	1198	567704	473.877	0.254741
SPANIELS	AMWS	AMWS000004	1380	750207	543.629	0.336635
SPANIELS	AMWS	AMWS000005	1404	807995	575.495	0.362565
SPANIELS	AMWS	AMWS000006	1140	544563	477.687	0.244358
FLOCKGUARD SIGHTHOUND	ANAT	ANAT000001	711	289165	406.701	0.129755
FLOCKGUARD SIGHTHOUND	ANAT	ANAT000003	733	293990	401.077	0.13192
FLOCKGUARD SIGHTHOUND	ANAT	ANAT000004	751	295517	393.497	0.132605
FLOCKGUARD SIGHTHOUND	ANAT	ANAT000005	1309	779138	595.216	0.349616
FLOCKGUARD SIGHTHOUND	ANAT	ANAT000006	702	268054	381.843	0.120282
FLOCKGUARD SIGHTHOUND	ANAT	ANAT000007	733	294943	402.378	0.132347
SCENTHOUNDS	ANFH	ANFH000001	839	301976	359.923	0.135503
SCENTHOUNDS	ANFH	ANFH000002	1051	445933	424.294	0.2001
SCENTHOUNDS	ANFH	ANFH000003	1080	491372	454.974	0.22049
SCENTHOUNDS	ANFH	ANFH000004	1089	518045	475.707	0.232458
ALPINE	APPZ	APPZ000001	1965	1.19727e+06	609.3	0.537244
ALPINE	APPZ	APPZ000002	1785	1.10216e+06	617.454	0.494562
ALPINE	APPZ	APPZ000003	1904	1.20691e+06	633.88	0.541566
ALPINE	APPZ	APPZ000004	1801	1.18522e+06	658.088	0.531833
ALPINE	APPZ	APPZ000005	1781	1.20067e+06	674.155	0.538767
ALPINE	APPZ	APPZ000006	1887	1.159e+06	614.2	0.520067
ALPINE	APPZ	APPZ000007	1780	1.17278e+06	658.864	0.526252
ALPINE	APPZ	APPZ000008	1711	1.09041e+06	637.291	0.489289
ALPINE	APPZ	APPZ000009	2094	964986	460.834	0.43301
ALPINE	APPZ	APPZ000010	2356	1.01269e+06	429.833	0.454415
ALPINE	APPZ	APPZ000011	2098	1.08921e+06	519.164	0.488751
ALPINE	APPZ	APPZ000012	2130	1.00747e+06	472.992	0.452075
ALPINE	APPZ	APPZ000013	2252	1.1515e+06	511.325	0.516705
ALPINE	APPZ	APPZ000014	2138	1.08995e+06	509.798	0.489083
SCENTHOUNDS	ARHO	ARHO000001	1392	788772	566.646	0.353939
SCENTHOUNDS	ARHO	ARHO000002	1370	834136	608.859	0.374295
SCENTHOUNDS	ARIE	ARIE000001	927	370191	399.343	0.166113
POINTERS	ARIP	ARIP000001	1235	654930	530.307	0.293881
POINTERS	ARIP	ARIP000002	1247	644228	516.622	0.289079
POINTERS	ARIP	ARIP000003	1353	845512	624.917	0.3794
POINTERS	ARIP	ARIP000004	1156	590284	510.627	0.264874
POINTERS	ARIP	ARIP000005	1272	680279	534.811	0.305256
POINTERS	ARIP	ARIP000006	1182	636401	538.41	0.285567
UNDEF	ASKT	ASKT000001	1012	447341	442.037	0.200732
UNDEF	ASKT	ASKT000002	1036	438874	423.624	0.196933
UNDEF	ASKT	ASKT000003	1049	439492	418.963	0.19721
UK HERDING	AUCD	AUCD000001	1806	1.13021e+06	625.806	0.507148
UK HERDING	AUCD	AUCD000002	1229	615210	500.578	0.276059
UK HERDING	AUCD	AUCD000003	1204	575131	477.684	0.258074
UK HERDING	AUCD	AUCD000004	1158	550560	475.44	0.247048
POINTERS	AUPO	AUPO000001	1284	659993	514.013	0.296153
POINTERS	AUPO	AUPO000002	1403	785089	559.579	0.352287
POINTERS	AUPO	AUPO000003	1353	787251	581.856	0.353257
POINTERS	AUPO	AUPO000004	1186	617224	520.425	0.276962
POINTERS	AUPO	AUPO000005	869	314823	362.282	0.141268
POINTERS	AUPO	AUPO000006	1258	618653	491.775	0.277603
UK HERDING	AUSK	AUSK000001	1296	732294	565.042	0.328597
UK HERDING	AUSK	AUSK000002	1236	649875	525.789	0.291613
UK HERDING	AUSK	AUSK000003	1089	544830	500.303	0.244477
UK HERDING	AUSK	AUSK000004	967	429921	444.592	0.192915
UK HERDING	AUSK	AUSK000005	1295	680450	525.444	0.305333
UK HERDING	AUSK	AUSK000006	1060	515027	485.875	0.231104
UK HERDING	AUSS	AUSS000001	1365	821980	602.183	0.36884
UK HERDING	AUSS	AUSS000002	1021	447268	438.068	0.200699
UK HERDING	AUSS	AUSS000003	1140	610453	535.485	0.273924
TOY TERRIER	AUST	AUST000001	1286	723724	562.772	0.324751
TOY TERRIER	AUST	AUST000002	1244	687408	552.579	0.308455
TOY TERRIER	AUST	AUST000003	1203	628440	522.394	0.281995
TOY TERRIER	AUST	AUST000004	1227	665685	542.531	0.298708
TOY TERRIER	AUST	AUST000005	1217	646382	531.127	0.290046
FLOCKGUARD SIGHTHOUND	AZWK	AZWK000001	348	98464.5	282.944	0.0441832
UNDEF	BAND	BAND000001	1012	398218	393.496	0.178689
SCENTHOUNDS	BANO	BANO000001	1424	881211	618.828	0.395419
SCENTHOUNDS	BANO	BANO000002	1611	1.02399e+06	635.621	0.459485
SCENTHOUNDS	BANO	BANO000003	1462	781301	534.406	0.350587
SCENTHOUNDS	BANO	BANO000004	998	454342	455.252	0.203873
SCENTHOUNDS	BANO	BANO000005	1692	1.01126e+06	597.672	0.453775
SCENTHOUNDS	BANO	BANO000006	1594	933840	585.847	0.419035
SCENTHOUNDS	BASS	BASS000001	1515	875134	577.646	0.392692
SCENTHOUNDS	BASS	BASS000002	1372	789670	575.561	0.354342
SCENTHOUNDS	BASS	BASS000003	1515	871188	575.041	0.390921
SCENTHOUNDS	BASS	BASS000004	1311	680686	519.212	0.305439
SCENTHOUNDS	BASS	BASS000005	1396	818693	586.456	0.367366
SCENTHOUNDS	BASS	BASS000006	1343	723952	539.056	0.324853
SCENTHOUNDS	BASS	BASS000007	1743	1.14562e+06	657.27	0.514066
UNDEF	BBLS	BBLS000001	1198	785176	655.406	0.352326
UNDEF	BBLS	BBLS000002	1228	797700	649.593	0.357946
UNDEF	BBLS	BBLS000003	1377	920510	668.489	0.413053
CONTINENTAL HERDERS	BEAU	BEAU000001	1277	656771	514.308	0.294708
CONTINENTAL HERDERS	BEAU	BEAU000002	1356	752777	555.145	0.337788
CONTINENTAL HERDERS	BEAU	BEAU000003	1125	526104	467.648	0.236074
CONTINENTAL HERDERS	BEAU	BEAU000004	1176	576355	490.098	0.258623
CONTINENTAL HERDERS	BEAU	BEAU000005	831	309310	372.215	0.138794
CONTINENTAL HERDERS	BEAU	BEAU000006	1188	612178	515.301	0.274698
CONTINENTAL HERDERS	BEAU	BEAU000007	1013	476971	470.85	0.214027
TERRIERS	BEDT	BEDT000001	1485	851889	573.663	0.382261
TERRIERS	BEDT	BEDT000003	1671	1.01064e+06	604.809	0.453495
TERRIERS	BEDT	BEDT000004	1637	978555	597.773	0.439099
TERRIERS	BEDT	BEDT000005	1747	1.10307e+06	631.406	0.49497
TERRIERS	BEDT	BEDT000006	1634	1.03332e+06	632.385	0.463672
TERRIERS	BEDT	BEDT000007	1703	1.00499e+06	590.128	0.45096
TERRIERS	BEDT	BEDT000008	1848	1.16168e+06	628.613	0.52127
BELGIAN HERDERS	BELS	BELS000001	1333	745514	559.275	0.334528
BELGIAN HERDERS	BELS	BELS000002	1261	703948	558.246	0.315877
BELGIAN HERDERS	BELS	BELS000003	1478	889128	601.575	0.398972
[truncated: 1,809 more rows]

## Sheet: Table S6
Table S6. Publicly available test samples used to measure imputation accuracy.
[truncated: 11 more rows]

[truncated: 15 more sheets: Table S7, Table S8, Table S9, Table S10, Table S11, Table S12, Table S13, Table S14, Table S15, Table S16, Table S17, Table S18, Table S19, Table S20, Table S21]
